# Supplementary material for: Differential Gene Expression in the Siphonophore Nanomia bijuga (Cnidaria) Assessed with Multiple Next-Generation Sequencing Workflows
Source: PLoS One. 2011 Jul 29;6(7):e22953. doi: 10.1371/journal.pone.0022953 (PMC3146525; doi:10.1371/journal.pone.0022953)
Supplement: File S2 — Gene reference (in FASTA format). Contigs (fasta format) of both the Newbler and the CAP3 assembly of 454 reads which were used for mapping the short reads. Unique counts of Newbler contigs belonging to the same isogroup were summed up to generate isogroup counts. (FASTA) [file pone.0022953.s011.fasta]

>cap3_Contig1
GGAATTCTGATCCTGCATTGTCTTCGAGTACATGCGAGCTTGGCAGAAAGCAAGTACTTG
TGGAATGAGTCCACGAAGGCCGAGAAGTTTACTTCCGCATTCTCCTTCACCACCGCGAGC
CAACTCTCCAGTTCCAGTCGGTATCCATCTGGATGAGAGTCCCAAACACGCATCGAACAA
CCCACACCC
>cap3_Contig2
CATTGTTGCAATTCCATTTAGCACTAGGCAAACAATGATAATTCTGGCTTAATTATTATT
GATGGCTACACAATAGCTGTATTTCAACTTCCTGATGGGAAATTTTATGTATTTGATTCT
CATAGTCGTGATGAGCGTGGATTCTCTGTTTTTGATGGAAATACCTGCCTTTTGTAAATT
TAAAAC
>cap3_Contig3
GTAAAGGGGAATTCTAAATTCTACGGTTCTCTAGAATACCGGAAATATAACGAAGGAGTG
CAATTTTGTTGACAGATGAAAACACATCCAACCCAGCTTATATCATGTCCTCATCAGCAT
GTATGCGTCCTATATGACTTTGTTCAATGCATAATAAAAATGACAAATATATGCTATAGA
AATAAAGATTGTAGACAGTAGAGGGTGTGCTTAAATACTGTTTGAAAATTATTTTTAAAT
TATTTTAAAAAAAAATTCACAATTGTATTGTGCAATGCATTATATTGTTAGTTCACTAAT
CTAGAAGATCTGAAAGACATCAGGTCCGACCCTTCCATGCTGCTCAATAAAAAAAGTCCA
ACAAAAAAAAAGATCTGTATGCAAGTCT
>cap3_Contig4
TTTACCTGGTGCTGTTTTGACAAGAGATCTTGAAATTTCATAATTACCAGGACCAGGTGT
TTCATTAACTCTCTCATCAAATCGTTTCGACCGATTGCCTATTGAAGATGCCCCTTTTAT
GTGATCATAAATTATCTTTGCCTCGTACGAACCAGGACCAGGCTTCATGATTTCATCTCT
ATTTAAAAGATGAGACTCTCTTGCATGTAATGAAGAAAATGGTGCATACCCTTCTCCCTT
CCTACTTCCAATTATTGTATCTTTAATATCATAACTACCAGGACCCAAGTTATCAGAAGT
TGAAGTTTCATTAACAAGTCCCTGGTCTTTGAAGCGTACAGCTCGATCATACATTTTTGA
AAATCAATTTTAACCAAATATCATTTTTAACTTCTTTTTATTCACATTTCCATCTTATAA
ACAGTGACTAAAAATAAGTTTGTTTATTTTATTTGT
>cap3_Contig5
GGCAGCGCTTAATTGAACATTACTTTGTTATAGTTGATTTAGAGGACGACATTCTAGACT
ATCAAAGATATTTCATCTACTTCAACTATAACAAGTAATGTTTCAATTAAGCGCTGCATT
TAAACCATTACGCGATGCTTAATCAAGGGCAACGCTTAAAGATATATAAAACTGCGCCGC
TTATTCGAGGACGGCGCTTAATGGAGGGCAGCGCTTAATGGAGGACGGCTCTTAATCGAG
GGCGCTGCATAATCGCGGATTTTTGGTATCTAATCAAA
>cap3_Contig6
CCATTATTTCTTGTTTATACTCATATTCCTTCTTGTCAGTATTAACAAGAATAATGGGCT
TTGTAAGAAACCAATATAAATTCAACACATTGATGGATTATCAATATTTAACGCCCAAAC
CAATGTGGAACTATTTTAACGATATACATGGAAGTGAATTAGGAAAAGAGAACTTCC
>cap3_Contig7
ACCAATTTGCCGGTAACGGATCACGTTCACGGCAATCATGCCCGCCAATCAGCAAAGCGA
GTTTACAAAGAGCCGCGCAAAAGGAATTCGGGGCCGGGAACGAGAATGTACTCATAAACC
AAGAACCGTATTATACGAATGTTGATAATCCGCTGACAACGAATAACGTAAATCGTCGGA
ATATTATCAATAATAATACTAATGATAATAACAACAACAACAAGCGTGTTTTTCACTCGG
AAACCGAG
>cap3_Contig8
CAGAAGCCAAGAAAGCATTACCTAAACTCATTCGTGAGCAAGAAGAGAAGCTTGCTCATG
CAAAGCGCTTTGCTATGGAACAGTCTGTGCAACATGTTTTAGCTAAACAAAAATTGTGCA
ACAAACTGATTTGTCAACACTCCATAGCTCTGCTCAACGTCAACGTGCCTTAGCTCTCAT
GTGTCGTATATACATTGGTAGTATCAATTTCCAGTTAGATGAAGACTCTGTCCGTGCTTC
TTTTCTA
>cap3_Contig9
GTTACGACATCGGGAAGCATTTTCAGAGCTGTTGCCGTATGGTTGTTGTCGACACTTATT
TTGCGCCGTTATTTTATTACGGCCATCGAACAACCGTTTACATTCCTGAAAAAGATAACG
CTAGCATAAAAATACGGTGTACGGTTGACCGCTGGCCACAGATTGCTGGTTTAACATACT
ATTTCTTAACCACACTTTTCGTTTATATAACTCCATTGGTAATCATGATTTTCTGTGGCA
GGGAATTAACGAAGAAACTAAACAAAAAGTTGCAAACATCTACTATTTTTACCATCGATC
CTGAACCTGGAATTGAAAATGGTGGCAACACAAGGATAAATGAAGGAATCAATGCTAAAA
GACAAAAAGAACACGATTCGACGACAGCCATAGTAAGGCTTTTAGCTGTCGTCACGGCTG
TCTTCTTTGTGACCTGGACACCTTATGTTGTTGTACGTCTAGTCTGGCTATTTGATGG
>cap3_Contig10
GGATTATCTTCTTCAATAAATATGAATATGACATTCTTGAGATGAGACTATCTGGAGTAG
AATGAATTATATTTTATGAGTGGCCACCACACCATATTTGCCTTTGCTAAAATGAATGCA
GGACTGCCATTAGTGTACTTGATTCGTTACACTTTTGCACACTACAGGGCTTACACGATC
GAGTTTATTTAAGGCTATTTTCTCAAACTAATTCTTATCCAATCAGTACAACCAATCTTT
ATTTCTTTT
>cap3_Contig11
GGAAACGCCGAAGGAAATATTATGAAGGAAAATACAGAGGACCACCACCACGAAAGACCT
CATTCCTTCGCCCAATAAAGAAAGGGACTGGAAAGGCAACAATTGGTTTAGCAGTATGTC
TACTGAAACATGAACGGTACAAATGGTACAAATGGTACAAATGGTACAAATGGAAATGGG
ACTCCCGATCTTGGAATTGCTCCCGGGTTGAGTGGTGAATATACCGATCCACATCTCAAG
GCACACAGGGGATAGG
>cap3_Contig12
GGGATTTACCAACATATTCGCCGAAGATTGTACAATCAATGAAGGGTATGGGAACTGACG
ACCAAGCCTTAATTCGAGTTATGATCACCAGGTCCGAGGTTGATTTAGCACAAATTAAAC
AAGTATTCCAAGACAAGTATGGTCAAGCTTTGGAACAATTCATCAAGGATGACACTGGTG
GTGATTACAGAAACGCTTTGATCCAAATATGTCGTGGAAATCGCTAAGTATTGTGCAGCT
TGGGTAAGAAAAACAGCCAGACGTATTAATATCTTAACTGCACCTCACGAAGCTTATTGT
ATGCAGGAATCATTTTCCGCTCTGGTTTTCCAACAAATGCTCATTTATTTCTGCGGGAAT
TTACGGAAATAGACATTTAGCACATTTCAATCATATTTATTCGCCAAATAATTGTAATTA
TGTTATGACTTAGTAGAATTATTTTTGTATCAATATTGTATTTTATGTAATTAAAGTGTA
CACGTTTCGTTGGATAGAAAAAAGAGTCATCTCCAGTCGGATGAGACACTATGGATAGAA
AAT
>cap3_Contig13
GCATCAACTATGACAACGAAACAGCATGAATCACAGCAAGAGAATAAAACTAAGTCACTT
TCAGTTCTCATTACTGGATGTGTGGTGGGCACTGGTTTCCTTATTTTCCTTGTGCATTCA
GTTGCTCAATATTTCTGTTGCAAAAGAGGTCTTTTGTTTAGGGGACACGCTATGTTGATG
TCCAAGAAGCAACAATGGGTTTTGTATTGATAGCTATGGCTTTATTTAGCTGTTTGAAAT
TTGTTTCTAACTAGGATTTGTCTAAGTTTGTCAATGTTGCTTTGAAACTTGAATCTTTAA
ATCTTGTATTCCAGACGATTAGTTGAAAAAAATATATTACCTAGAAAGTTTAAAG
>cap3_Contig14
TTTCGATTGAAATCCATGGAAATCAAAACAAAGATGTTTTAAAGAAAGAGAGGTACAATT
GATGTTGATTAGAGAAGTAGAGTTCTCAAGAGATTAAGCAAATGAGAAAGTACCTCCTTG
TTTTAGCACATTCTAAAGGTGTTGCTGATATAGGTAATTGTTTGTCTCTTTGAAATAACA
TAAAAAAAGTTGAAGATTTTTTGTGAAAACTTAACGCCTGTCAGGTCAAAGTGACTTTAC
ATCAACCCTTATTTATTTCATAAGAAGGTGTTTTTTCCATAGGCATAAAAAGGACTGGGG
GGCGTGGGGGGGGT
>cap3_Contig15
GGCGCAACCAACTTTCTTAAGTTCTTATCTTGTTCTTTCGTTCCCAAACATCTTCTCGTA
ACCAGGCAGGTTCACGTCTATTGCGAGCTGGATATGTACCGGTATCATTGTCACTATCAT
TATCACCGGTATCATTGTCACTATCATTTTCACTGTCATGGACACTATTATCGTCATGAT
CACTTTCACTACTATTTTCTTGTATCTCACTTTCTTCACTTTCCTCAGTTGCAATGAGAT
CATCAACAGGGGTAGATGGTATCGGACCATCATCACTTGATTCTTCTTCTACAATCGTAG
ACGTAATGGGTTCAGTCAGCTTAGCTATAACAGGAAAGATACGTGTTAATGGTACCTCAT
ATCTCTTGGACATAAGTTTCGATCCATTCATCTTCTGCAGTACTGCATCTTGGTTTGTTA
TTTTAACGTATG
>cap3_Contig16
TTTTTGCTATTTTATTTGTTTATTACTGTATTGTACTGCACGTCGCCTCAATTTCCACTT
TTTCATCAAGGATATTTCGGGTGAAAGAGATACGATCTTAAAGACCACGAGAACTAGCTA
TTGGTCTCTCAATTGAACATGCTTTTACAGTAGACAGTAGCTTTTCTTCACATCTCTCCT
GCGTTTCTTCACCCTCTAATCGTATCAAACATTAAAAAACAAAAGCACTTAATGAACTGG
CTTTCATATATGCGATAGGCCTAAGTCACCATAAAACTAAAGTTTGAACAATGTATCCTT
AGATACAGAAACAGTTTACGTAATGATGTCCTTTTATGACTATAGAAAAAGTATCGATAT
AATGATGCTTAAAGTAACTTACCAATGCGGCATGGTGTTTTGGGGGTACAGCATCCATTA
TCGTGCCCATCACATCGTAATTTATATGTTGGTTTAGATGCAAGAGCTTTTGGTTCATAC
AGCAATCGTCATTGTCTCCCCATGGGCAGTTGTTGTGTCCACA
>cap3_Contig17
TGTTGTTAGGTTTGTATTGAGGCAGGTAGTAGATAAAAGATAAATTTAGTTAAATTATCC
GCATGCATTCTTATCATTGCAGCTTATCTTGTCATATAAATAAACATTAGATTGTGAATT
TATAGATTTATAATTATTTTTTTAACAGTCCATTACTGATTGCTAAACGTACGAAGAGTC
AAGTTGATGCATCTATTGCATGTAGTTCAACAATACGAAAACACGCCAAGGAAGTTGAGT
ACTTCATAGGTATTGGGTCTCAGTTTAGTGAAAAAACTCTAAAAATTATGAAAGAAAAGC
TGTTTCGACGTATGCCGAAAACTGATCGTCAAGATATTCTTGAAAAATTAAAGTTATTGA
AACCAATGAATGCTGAAGATGGTCTAGCTATGTTGGCTGATTTGAGTATAACATGGTACA
CTTATCGTTCTTGGGGAAGGTGGATGCGTAAGTTTGGTTTCAAATGTCCTTCTGAAAAA
>cap3_Contig18
ATTGCCCAGTGTGTCAAGATGATCCGCGATTTGATGTTCTCTGTTCACGCTTTGGTGAAG
ATTGCAAGGGTTCTGGTGGACTTGCACGATCTGTCCGAAAGCATTGTCCAAAAACGTGCA
ACTTTTGCTAACTTGGTTCATCGATAAAAAAGTCCAATTTGCTTCTGATTTTGTATGAGA
TCCACTGATGTACCCTTCAAAAGAAGCATGTTAAAAAGC
>cap3_Contig19
GTCGCCGTCGTCGTCCGTTATCCGTTATCCGTTATCCGTGGGTACATTCGTCGTACCTTC
GTCGTCTTCCTCCCTTCGATCGCCGTCGTCGTCGTTCCATCTTTGACCGTCGTCGTCTAC
GACGACGTCGACGATCTTCCTACAGTCGTAGATTCTCAAATAACAAAATCAACAAGTATC
TCGTCAGACTTTCGAGATATAATCGTCGTCGTCGTACTATCCGTCGCCGTCGTAAAATAT
AAAAGATGCCATCAAGTTTCATTTAAATGTTACGAAAATATTTTCAACCTATTTCATGCC
AAAATTAGCCTTAATTTGGAGATACTTCCTTTAGTGAAATATAAACACAAACG
>cap3_Contig20
TTTTACATTCCTTTGTCCTCGAAAGCAGTTTGAAGTTGCTTTCCCATCCAACTCATCGTA
TTTTAGCAACTCTTTATCTTCATTATCGTCGTCTTCAGTCACTTCTTCGTCCTTCAGATT
CCTTCTCACGCCAACTAGACACCCTATTTGATCGATAAACAGGCAACTGACCCATTCAGG
CATTGCTTTTATCCCCTTTTTCGTCGCTCGAAAATGCACAACTAACACAAAACAAGTTCC
AATGAGTGAGCAAGAACTAGCACCCATTGCCCAGACATAAAACAGAGATAACGCAGGTAC
TGTTGTCGATGTTTTCGGTAAAATTATCACTTAGCACTTGTAAGTAAACTGCAAATACAA
GGAGAACTGTTATCACGACTCCTATTCGTTCTCCGCTATCAGGTGGCAAAAAGAACGTGC
TAAGAATGATGAGCATTTGAATAAAACATGGAATGATTGAAGTG
>cap3_Contig21
TTTATTTTGGTTCAAGAATTAAGGGTCAATAGAAATGTGTTGAATAGTTGTTCAAATGTT
GGCCTACATGATGGCTCAGCACTCCAACAACTTAGCATAACTTGATATGTATGGTCAGAA
CAGATATCTGGTTTCTCTAACCTAAGACCTTGATCTAAAAAGCAATTACTTCCCCTCCTG
TTTTTTGACCATAGGGTAAATCACCATAGGTAAAAATCTCCCAGAGAGTAACACCATAAC
TCCATACATCAGATTTGTGCGAGAAGGTACCATAATTTATAGACTCAGGAGCATACCATT
TTACAGGCCACCGACCTCCTTCCTGTGCCTGATAATAATTGCTTCCAGCTCCTACAGCAC
GTGACAATCCAAAATCACTAATTTTACACAGTTTCTTTGACGCTAACAAAATATTTCTGG
TGGCAAGGTCTCTATGAACAAAACGCTTTTGTTCTAAATACATCATCCCCATTGATATTT
GTGAAGCCCAGATATTCTGATCTTCTTCAATTATATCACTTTGATGGTCAATAATAAATC
CAACAAGCACCCATTCCACAAGTTCAGTTATACAAATCATGGGTCGTCCCCGG
>cap3_Contig22
TGCACTAATGGACTCTAATTGGTTAAATTATTGCGAAAGATGACGCGTTACGAGTTAGTT
TAAGTATATCAGGTATCATGATGAGCACATCGTTAAATAGTAAGGGGTGTATGGCCTGAA
GCTCCATTATTTAAATACTCCACACAGATATAATACATATATTGACATTATAGTACGTG
>cap3_Contig23
GGTACTTCCTTTCGTGCCTGTCTTCTTAGTATGTCCTTCAGTATTATTGTCTTTTCGATC
TGGATTTTCTTCCAGTTTCGTAATAGAACCATTTTCTTCTTTTATTTCATTTGGTTGACT
TTCTTTCTCAGCTGGCTGAGCTAGAGGTGGTGTACTTGATGTTTTAAGATTTTCTCCTTG
AGGCGTCTTTCTTGTATCTTTCGTAGCAGCTGTATTTGGATTAGAATCTAAACTTGCAGC
ATTTAATTAATAGAGTCCATAGAAG
>cap3_Contig24
TTGACCTTTTCATCGGAATCGTTCTCGTATATAGTGCTCGAGTTGCAATGTCAATATGTA
CATCTGCAATGAGCAAAGAGTTTTCATGGTCAAAACAGCTTCTGGAATGGCTCTATCAGC
ATTTTTCTGTGGATATGTCACAACAAATGTTGTTGGTGGTTATTTAGCTGATCGGCATGG
CGGTGAAATTGTCATTTGCTATACAGCTCTTGTTTGGTCTATAATAACAGCATTTTTACC
GTTATTGCTTCTTCTGGAATAATTGGTGATTCAACGTCATCAGTCTTGCTGCTT
>cap3_Contig25
GTAAGAACGCATGCGCGCGAATATCAAAATAAGTAAATTATCTAGTTGTACATAATTCGA
ATGAAGAGAAATGAAGTGGACAAACATTGGAGGTCTGGGATCTACACCACCGCCGTAATG
GAGAGATATTGGTTCTAGAGCGGTGAAACTTCCATCGTACATAGAGAACATGCATATCAA
CGACTTTATGGTCTCTAAAAGAAACAATATGGACAGGAAAATGTTGTTATTGAGTAAATA
AATC
>cap3_Contig26
CGGATTTTGAGCAGCCTACCTACGTAATGTAACCTTTCAACAAATTGGTACCATCAGTGA
CGAAAGAAGACATTCAATAAATGACTCCTCCCCATTAGCAAAAATATTTTTCGAAATTGT
TTTGATATACAAAAGTAAATTATTGGAATTTCTGATTTTTACTATATGATAAAAGACCAA
CCTACCATACGAATTTATGGTAACCGATTGAAACCAAATACCGGACACCTACCTACAATA
CCAAGGTTACTTAATGATTAAATAACCCCTATATGACATCATAAGAAAGTTCAATTGCAG
ATAGGTGACATGTTACGATATCCGTCTTATAAAAATCAGTCAAGACATTTCAGGATGATA
>cap3_Contig27
GTGAAATGTAATCGCACCCACTCGCTCGTTGTGTCCTTTCAAAACCCGCAGTTCGTTTCC
ATCAGGGACAGTCCATAACTTACAGACGCCGCTCCACGACGATGTCGCCAAACAATTTCC
CGTTGGGTGAGAACTCGCAATACGACAACGGTCGACTATCGCCGATTTGACTGCAGAAAT
TGACAAGAGCTCGTGACTTTCGATGAAGCTCTTGTGTTTTAATAGCGACGTCTGCTTCGG
GGTTACTCAAATTCTTTCGTGCTTTCTGTAAGCGCTGATCGGCTCGCACCAACGAGTACT
CTGCGATATACAAACGAGACACTTTCAAAGAGTCCTCGCCCTCATAGGTACCACACTTCC
G
>cap3_Contig28
ACGGCTTTGAGCAGGCCATGTCATAAGGAGAGCAACCGCGCGCGTGCACCTCCGCACGTA
CCTAAATCATCAATTTACCGCGCATCTGAAACGTATTTCGAGTGGTAATGGTGAGGGTGT
GTGTGCGAAGAATACATAGTGTGGTGATAATGTCCC
>cap3_Contig29
AGAGATTATAGAGCAGAAGATATGTGATACCAAACTTGATGGGTCATCGGTTGCATCAAA
GGTGATTGTTTTCGAGAGGCAACATACAGTTCGTTTCATCAAAGGTTTTTATATATTTCT
GCAGATTGAAGTCTTTGGAGGAGACCATCATCAGTAACAAAGTGAAACTGATAATTGTTG
ATTCCATTGCATCACTTGCCAGGAAGGAATTTGGTACAGATGAC
>cap3_Contig30
ATGAGGCAGGATGACGTTTCTCATCTCACTTATTATTGCCCTGATCATAATCGCGTTGGT
CAAATGATTGATGAAATGAAGGCCAAGAAACAACTCGCAAGAAAAGAAAACTTCACGTCA
ATAATTTCTTTAACTTTTTATTATTTTTCCATCCTTGTAAATACAATGTTAACAAATAAA
ACTGAAAGTAAACAACTAGAAAAATACAATCTTTTTGTTTTTACTTTTGTCTAATCATCA
TCTTCCTCTGCAGCTGAACAATATGGTGATATCTCATCATTTTCATTAGAGTCAGTTGCA
GAAAGTACATTATACCTTATATTTT
>cap3_Contig31
ATTCCTTCTCTACTACTCACTTTCTTTACCTTCTTGAATAACATGAGTCATTTGTTCTCT
TACCACCATCTTCAATTTCTATTAGCCCGAAGGGCATTGTTTGGTGAGAATTCTTCAAAT
TTAGATGTCTGTCTACCCACCTATCACCCTCTCAGTTCC
>cap3_Contig32
GGGTGGACCACCTCCGATGCGCCCACCGCCAGGGGTCCTCCAATGAGACCACCACACGGT
GGACCACCGATGCAACGACCGGGGCAAGGGTTACCACCTCCACGGCCACCACCCATGCGT
GGACCGCCACCAGGTCACCTAATGAACATGCATCCACGAGGACCACCACCAATGGGCGGT
CCACCACCACACGGACCACCGGTAATGGGAGGCCCACCACCACATGGACCACCGCCACGC
GGCCCTCCACCAGGTATGCCGCCACCAGCGGGCCCGCCTCCGACCGGCCCTCCAGGTATG
CCGCCATCTGGAGCACCGCCGAGTGGACCCCCACCTCTTGGTCCTCCGCCGAATATGCCA
CCTCCAGCCGGACCGCCTCCAGGTATACCACCGCCGACAGGCCCACCTCCGAACATGCCG
>cap3_Contig33
AAATATTCGAAATATTGAAATCTCGTTAGACATGTTTGAGCCGGTGAGAATTGAACGTGG
CACCGGATCATTGACTCAGGGTGTGCTGTTTATCTAAACCATCTTCCACCCTCGTTCCCA
GTGCTTATATGCAACAGCCTTAAAACCGCTAAGAAGGCACTGGTTAAGAGTTGGGTTTCT
TTATCAAACAAATATTCGGTCACAGTAAGCTTTCGTTTCTTCTCGAAATTCCCATTCAAT
GTCGTCAAATCATTCCTCGCCGATAAACAATCCAACTCCGCATCAATGGGCACACGCACT
TTGATATATTCCTCGTCACTTGTCTCTAAAATATTCAATACAATATCAATGTTTGGGCGG
CCATGTATATTGACCGGTAAATCAACTGACATTGCTCGTTGTTTATTCTTCTTCG
>cap3_Contig34
TTTTCGAATGCTTTTGTCACGTCATTCAAACGTTTTCTTATAGAGTAAAAAAGTTATTTC
AAAAATGATAAACAACCCTCTTTTCTCTCCATCTTAGTTGTTTATCTGGGTAATTGTTTA
TCCAGGTAATAAAGCCAATACTAACTGGCTAGGCTGGTACAAACGCAGAGGAGAATATTA
GCCTGAAGACACTAGTATTAGCCTGACCGCAGGGAGGGCTAATGCCTTGTCCAGTGGTAG
ATCTGGCTCAAAAATTTACTTAAGGCTGTGGCTCCCTAAGGGCCCAACATCGACATCGTT
GAGACCTAACGAGAATAATTTTGGAAACTGAATCATTCTTAACTGTTGTAAATGCATGTC
AGGGTCGATTTATCGATTTATTACTTACTTTGAGGAGCTGGATATTTTAAATCTTTGAGA
AAATTTTTAAAACAGAATGTCCATATGAATAGTATCTGAAACTTAATCATGCAATATTTT
GAAATATCAATAT
>cap3_Contig35
CTTTAACCCTTTGAGAGAATGCAGCTTTTACTGAAGCAATTAAACCAATATATTCCCTTA
AAGTTTCTGATAACAAATAAAAGTCTGTTGATGCTTGTTCCGCATGAACCAGTTCAACTT
TTTCTTCCAACTCAGCAAGCTGAGCCAAAGCTCGTGATAGACGAGAATGCTCCTCAGTAC
TACTTAGCAAAGAGACACTCTTTGCAAAAGCTGATGTATTGACAGACACTTCTCGACGCA
GAGATACCAGCATCTCAGATGCTGCATGTAACTTTTTTACTGTTGGTCAGATCATCAATT
CGACTTTGCTTCTCTTCAAACCATGAATCAGTTTCTGTCATTTTAGACGTCATTTTCGAG
AATGCTTCACCGACACCTTTAGCCAGTCGAGACAAGCCACCCTTACTTAGAGCTGAAGTA
TTTTTAGCACGAGGAAGTTCTTCAGCTTCCAAAAACTCCTTAAAATCATGATCATCCAAT
AACAATTTGTGTTTTGAGATACGATTTAAAAATTTCTCCAAGGCATGTTGTCGTTTGGAA
ACAAAATCTGTACTGGCTTGGTCATCCTTAGAACCTTTAACTTTAACCATTCCAACAACT
GACTTATCTGGAGGTGGTGGAACAATTCGGCCATAAGGCATGTGTTTTTCACTCAAGCGT
TCATGAAGACCAAGAAAATCACTAAATCTACGTTTCACAGAAAAATCTAGAGCGTTTAAA
AGAAGCCAGAGATGTCTGTGTTGTAACAGAATATGCCATGTAGGCATTCATTCATCGCCT
ACTTTCATTGGATCAGAAACTTTAATTGTCTATATCGAACGTATCTCCT
>cap3_Contig36
TTTTTTCTCAGCAGCTTATGCTTGATACCCAACCTGCCTTCACAGATATCTTCTGTTTTA
AAAAAAGAAAACTGTTTTGGGCTGGCGTTTTATTCATAAATCTATACCAAAATATTTTTC
TTTCCTTTTCAGTAGATCAACTTTTATCAGTGTGAAGAGACCCTTAGCTTGCACTTTGTT
GAGTTTGTACTGTAACGAATTCAACCCTTCGACGAGGGAATATTTCTTTGCGACGTCCAT
CAGTTTGAACGTGTGTCGTCTATCGGAGACGCTTCTGTTCGCTTCGACCACTGATCTATG
GGGCAGCATGGTGTACCTGGCGATCTGAAGAGACTGTCTGTGAAAGTTCATACCTACCTT
TCGTACACGGTCTAGCAGATTATCATCCTCCCCTCCCCACGTGTAGAAAAGATTCGAAAA
GCCGTTTGTTTACCGGAAATCGTGCGCCGTAAACATTTCACTCCGCCGAAAATATCCGTA
TACGGCAATTCATAATTAAACTTATTTACGGCAGCCGAAAGATGCATTGGTGAGTGTTTA
CATCGATAATTGAT
>cap3_Contig37
GGAAGTTTGTCGATCGCTCGAGAAAGAAGAAATTGTTGCTCTTTATCACAACTGTCATAA
GCATCTAAGCCTGATTCCGTTCGGTGGTCGGTTACTGCAATAATGTCAGACTTTGGTATT
TGATTTCTTCTCATATTTTGCTTTACCTTCTAGAACTAATCGCGATCGTGCGAAATATTG
ATGATTCAATATTGAGTATTGATAGTTTTTTAACCTCAAACATCTCTCTATACTCGCCTG
TAATGAGCGAATTTGGCTCGTACTCTTCACCGTCCTTCTTTCTAACTTCAGTAAAAAAAA
TTGTTTGGAGTACAAGATCAAGTTCGAAATGAGCTAGCTTCCCAATTTCATGTTCTTGTT
TTCTTGCTGTAGCCCACTCATTGAAGCAATTCATCCATTTCTCAGTGCACTTTTGAGTAT
TTGCATTAGTGGCATTCCCAACATAAACATCAATGTTATTTGAACTTCCAAATCTCTCCA
TTGTCGATTATTATTATTATCGATGATCGATCAGTACAATGTTTGTTTATGTCTGTTTTC
TAGTTTCTATTTTTCCGTTAAACCTTGGTTTGTTTATAGTTACGCGGACGGTGTATATTT
TTGTCTACTCGTGATAAA
>cap3_Contig38
GCTGAATTGACCTTTCCAGTCAATTGCTTTCCACAGGGTACTATGGCTTTCACAATCCAT
TATTCGTTCCCAGCGTGACGTTGCAGGGTCATAGGGTTCAGAATGAGGTGGGGGAGCTTT
ACTTTGTGTGATAGTGGCGACAACAATTCACCGAATTCGTTAGCCATCGTGTTGTGGTCA
CCTGTGATTGCTAGCATTGGATCAACAGAGTTCATATTTTCAGCAAATAGGATGGGATCT
ATTTGACGTATTCCGATTGGCGGCTTACAGAGTGGTGTTGGCTTTTCTGGATAACATCCG
ATGTCTGCTGAGCGTGTTGCTATTTGTCGGAGACTGAGTCTTTCTTCTGGGAATGTGAGG
CTGGCGGTGACTGGTGCATGGTTTGATGGAAATGCAGTATTCTGGTCGATGATGAGTTCT
GACACACACAGGATGAGTTTCTTTCGACACGATACACAAGTCGAGCTGGGACGTCCAACG
GTTTTCATTCTGAATGTAAGTCCACCTTCGAAACTACTT
>cap3_Contig39
TCAAGCCGCTACTACTGCCCAAAAGAAGAAGAGTAGTTTAGAAGCTGCATTAAAATCATT
GAACGTTGCAGTCAACTATCCTGGACTGAAGGTGAAGAAGATGCATATGTTATTCTTGAA
ATATGAACGCTCTGAAGAACTCGAAATACTCGGAACTCCCGAACGCTGCACGCAGTTACA
TGAAGACAAACAACTTGTATAACAGTGACTACATCACACATAGTGAGAGTGACATACATA
AGAAGGGCTACTACAACGCGCGCATGCTCGCACGGATCAATAATGAAAAGAGGAATCAGA
TTGCCAAAGCTGCAGCTGTTGCCCGTCACAATGCAATGAAATCCCACCAGAGAATGATGG
CTAAGGCTGCACCGATAACCCCTCTTAAACAGACCCTGAAAGAGGCGGAACACATCAAGT
ACAACGTTGCGAAATCTTTAGCACTCGAGCAACAAGACGACTATTCCTGGAGAAGAACTA
TTAAATCC
>cap3_Contig40
TTTTATCTATTTTTCTTTTTTTGCTTGTGTTTTATCAAAGAACTGATCAATCTTAGATGT
ATTGTCATCTTTTTTGTGTTGTTTTTTGTTTGAATGACTGTCTTCTTTCTTGTTAAATTT
TTTGACTGGCTCAAAAACTTCTTTGTTACTTTGATCTTTCTTCTCACTTTTCTTTTCATC
ATTCTGTTTGTTTACATAGTCAGAAGCTTTCATGAAACCAGTATGGAGCTTAGCAGTGTC
ATCTTCCTCCTGATCCTGGCAAGCTTTC
>cap3_Contig41
AGTAGGCTGCAACAGAATTCCTACTAACTCTCCAGCTAGAACCTGCTGCGTAGTGTCATT
TGTTGTCTCTGATCGTCTTTTATTGAGGATTTCACGGTGGCAACTTCGCATTGTGTATTA
GACAGAGGGTGAGAATGTTCATTGGTCGTTTCCACGAATCTATCCATTGCATCCAACTTT
AGAAGTGCTCTACATGAACCAGGAAATTTC
>cap3_Contig42
GACTTCAGCTCTTTAATGGACTGACGTCGGTTAATGACATTGCGTTGTGAAGTCATTAAA
ATGCAGATATTACAACGTCAATTGTAAATATTCTATTCATTAGCTTGAGAATGATTTGGG
TAGGGGTCGAAATATTGAGAAGATTTGATGTCGTTGTTTCTCTCTTAACATTTAAGAGAG
AACAACGT
>cap3_Contig43
TTTACGATACATAAAGGTCAGTCGTATTAACTAATCAAATGTCGTGATATGATATATGAT
AATTCATTAGAATCCATTAAATGCATGATGACTCAAATTTCTATAAAGTTATATAGACAC
CTTTAAGAGTGTGTATGTGATTGAAACCGAGTCATTATATACAGTGAAACATTTTTTATA
GATCGAAAACAATTCGTAAATATCATTTTGTTATTGCTAGGTTTTTGGGGACACGCCCTC
TTGATTGTAAATATAATCGCGGGAGTCTTTCGAAATTTAAACATGATAGTTTCAATTGTT
GATAGTTTAATAGTTTGATAGTTTAACCATTAAATGCGATGTGCCTTTGTTATTCATTTT
CAGTTTTGTGCACGAAACCTTTATTGAATAACATTGGGTTATTTGGGTAAAATATTTGTT
AAGTTTTCATTTTATGCTGTTGACAGTTTTAAGGAAGTAATAATCTTTGGGAGAAGTCAT
GAGATAGGT
>cap3_Contig44
AGATAATCCACCAGTCGGTACGAGATGTTATATCACGGGGTGGGGTAAAACGAAACACCC
CGGTCATATGACGACAATTTTACAACAGGGTTTACTTCCAGTTGTATCAAACAGGGTTTG
CTACGAGAAGAATCATCATTCAATTCCCGTACCAATAACAGATGGCATGGTGTGCGGTGG
AAGTGGTGGCACTAGCCGGACTTCTGGTTGTCATGGTGATTCTGGGGGACCGTATGTTTG
TCATATTGACGGTCCCCCAGAATCACCATGACAACCA
>cap3_Contig45
ATTGAATACTGCATTACACGCGACAACACCAGCAGTTTGGTTACCGTATACGTCATTCGA
TCAACTGATAACTGCGTTGAGAGCCAACTATGACAATCCGGATGCGGCTATGTTGTGCGA
AGAAATTCAAGACAAATTAGACGACTATTTCATGAAAGTTGAAATGATATCGTTGGACAA
ACTCAACTATCTTCACAATGTGAATTCAACGTTAGCTGCCGTTAGCTAACACAAAATTCT
TCGGTTCCAGATCGTTTATAAGGTATTTGCTGTACCTCTCTACCTCTACGATTGATTAGC
TGCCATCGCAAGGTTCTAATTGACCGTACGCTACTTTAGCAGAACCTTTGGTGCTTCATT
AATTTGAAGACTGACACACAAATGAAGACTAGTTCTAATTTTGTTATTTGTATTTTATGA
AGGAAATTAGTAATGAAAATATTTCCG
>cap3_Contig46
GTGGAGGTGGAGGTGGTGGTGGAGGAATACAAGCGAGGTGCTGGGGCAGGGCAGATCTTC
ATACAATGATGGAGGCAGACTGGCGGTGGTGGAGGGGCTGGAGGAGCAGGGGCCCCTGGA
GGTCCTGGTGGTCCTGGTGGTCCTGGCATTCCTGGGCCTCCTGGGCCTCCTGGTGGTCCA
GGTGGACCGCCGGCACCTGGGGTTCCTGGTCCTCCTGATGGACCAGGTGGTCCGGATGGT
CCAGGTGGTCCTGGAATTGGTGGTGGTGGTGGTGGTGGTGGTGGAGGAGGTGGTGGTGGG
GGAGGTGGTGGTGGGGGAGGTGGTGGTGCACAGCCTGCACCGCCTCCTGCTGGTCCAGAA
GGAATTGTAATTGTGTGGGTGCTGATTCTTGAACAACTGGA
>cap3_Contig47
GAAATCTGGTGTCATATACAATTTGGTTACTCAATTCCATTGCAAACGATTTCGAGACAA
ACCTAGGAATACTGATCTGTTCTATGATGAAGTAATTATGAATTGAAATGTTAGATTGTG
TTGATACTTATGATTTTATGAGTAAATCAGTTCGTTTGTTCGTCCAATAGCATATCGAAC
TGCAATCAATGAGCTTCAAGATATAGGTGCAATAGATGAGAATGCAGATTTGACAAAGTT
AGGCTATTTT
>cap3_Contig48
TGCATAGATTAAACTTTTCAATCAACAATATTTTCTATTTTATGAAGATTAACTTTTGCA
GTAAAGCCTTCATTGGAAAATTTTCAGATTTAATTTCACAATATTTACAAAAACTGCAAA
ATATGCAAAATTTATTTGATACAATGATTTTGGAAA
>cap3_Contig49
GCATCGCATCAATGGCAACATTAGTAGCGAATTCTATGAACTTGCGAGCAAAAGGGTGAT
CTTCGTGAGAGAAAAGAAGGAAATGAGTGAAAGTAAGGGTACAAAAAAACGGTTGGTTAT
TGCGTTTAAGACGGGTTGATGGAAAACAGCCTTCTTTCGAACAAATAACAAGAACTATAC
CAGGAGTATCTTGCCTTAAAACTGGTATGTTCGAGTTACAAAAGCAAAGATGATAAATCT
TTTTCATTCATTATGAATCAAAAGATTTTAATTGTTGATAAATATTCTAAAGAACTGACT
TGATAAGCATCAGGGGGCGATAACGAGATTTTATAGGGTATCCAAGACGGGTATTCGACC
CATTTACATATAATCAGAAGAAACGACGAAGAGCAGCATGCTTATGCTTTGGATAGAGAC
AAAATGAACCTTTTAGATAGAAGATGCTGTAAGGTACATTTTATGTTGAATTGGTAGTTG
ACAAATCTTTAGAATGAAAT
>cap3_Contig50
GCCGCATACCTTCGTTGCTGCTTAGATCATTGCTTTCTCCCTTCATGATGTCATCGTTGG
ATTGTTTCATGTCACTTCTATCGTCATTAGATTTGATTGCCAGAGACCAAACCTGGGTGG
TGACTGTAACCATCAGCACTACAAAAGTTACGATGATCCGATTCATTTTGTGAAAACTTT
CCGTAATTGCAAATTTCCTTTTTTAAAAAAAAGAATAATTCGACTCTGATCTATGACAAG
TAATGTTGAACTCTTCTCATTACCGAAGTGTATCTGTTATAAAATCTGTAAAATTGAATG
AATATATAAATATATATAAGTCGGAACT
>cap3_Contig51
GTAAGAACGAAAACGACCCTATAGAGCTTAACTTATTGTTCTTTTTAATTAAAATAATTA
TAAGAAATTATAATAAAAAAGCTAGGTAGTTTAGTTGGGGCGACTACCTTTTATTAATAT
CAAAGGTAAACAAAATAATTTATATATTTATTGTATAATCCATCTGTTTAACAATTACAA
AAGTAGGTAATAATGACCCGTTATTATTAAAAAGAAAAATAACGATTAATAGATAAAAGC
TACCTTAGGGATAACAGGATAATTTTGATATGGTCTCTAAATTAAAATTATCCTGTTATC
CCTAAGGTAGCTTTTAATTTAGAGACCATATCAAAATTAAAGTTTGTCACCTCTATGTTG
AATTAAGATATCCTTATGAAGCAG
>cap3_Contig52
AAGGAGTATTGACTGATTGTATAACAAAGCTGGTACTTTGAAAGAAAAAGCCCATTGTTT
TGTTGACCTTGGTGTTTGTGTTGGGGAAAAGGCAGCTGTTTGCGCCAAAGAGTGTCTCAT
GCCCTTCGCCATGTGTCAAATGGCTGCTGGTGTCACGTGGCCTGCTATTGTAAAGTGTGG
TAAATCATTCCTCTCTTGTTCGGTGGCTTCTTGTATGAAGAATGAAGCACCCACCAACAT
GGTATCCATTGACGATGAGATGTCTCCATACGAATTTGCAATCCAAGCTGTTGATGACAA
CTCGGTTTCATTTACAGAATGCAAAAAAGAATTCTTCACATGCATCAAAACAGGAGAAGG
TATCACAGGAAACTCCAATGTTTACAAAAAATGGGAAAATGTATCGGAGGCGAATTGATC
GGTTGCTCAGCTCACTGCATTCCA
>cap3_Contig53
CGTAACAACACTTCTTCCACTTTCTGCAAATTCCAAACCTGTCTTTACAATTAACGTATC
AGCATCCCCATGGCATTGAACTGTGGCGAACCCTGCAGCCTTCAATCTGGTGCACATCAA
TTTGATTAACTGATCCTTATTGCTTTGATTTGCTAAAAAGGCTTCCATGCTACAGGTTAC
CTTCGTGTTTTCTTTGATCTGTATGCTGTCTGAGGTTGTTCCCATTCGTCTAAGATGTTC
TTGTGATTTACCTTACTGGTACTAATTTTCGCGGGTACTAATTTTCGCGCTATTCGCGGT
TTTTTCCTAAAACGAGTGGGCTTCTTCGATAATGTTTTCTCCAAATTTTAAGTTTGACTA
ATGCTCCTCGATCCATGATGTATTTAGTTATACGACTGATTT
>cap3_Contig54
AAAACTCATAAATTATTAGAATAATGTACATTTCAGAAGCAAAACTAATCAAAATCAAAC
CTGTTGAATTCAACATAAAAAGGTTGCCACAATCTTAACAAAAAAAATCAGAAAATGTAG
AAAAATCGTGACCACTGGCAACCCTGACATAAAAAAGAAAAAAGGAAAGAATTGTTATCA
AGAACCAGCTGATAATCAACCTCAAATTAACTTAAAATTACACAGAAATAGACACATAAA
TTTGGCTACCTTAAGGGCTATTTTATTGTCAGGCCAAGTTTTAAGCCAGC
>cap3_Contig55
GTTTTAAAGAACATTTCTATCACTGCATATCTATTGAGAAGTTTTGTGAATGTCAATCTG
AAGTGATGAAGTTTATTGCAGCCTGTATCTATCCTCGTCCATGTAGCATACTTGAATTGT
TCTGTTCTTGCAACTATATTCAATTCTTCTACATCTTCTTTAAATGCAATCATGATATTA
TAAGCCCAAAGAACTGTAACATCGAGATTTATCTTGAAACCAATTTCGCCAACTAAGTCT
GCTCTTGGACAAACTGAGCAAATTTGCTTACAAGTTTTTAGATGTTCAATAGTTTCTGCA
CTCTGACTTGGTTGTGTGGGTATTTGACACTTTCGATCACCTATAGTTAACTTTTGAATT
GACGGAGGTGGACCACCACAATGCATTTTCTTGTTCAGAATTTTCATCTTTACGTACACA
TGA
>cap3_Contig56
GTCTTGTATCGTTTTGGAATAAAGGGGGTATGATAACTAGTGACTACATTGTAGTCATCT
AAATCTAAACTGAATTTCACACCGATACAAGACCCAATATTTGAAAAATCTAACAAGGAG
AGTCGAAAAACTATACCCAGAGGAAAATGTCGATAAACTAAGCCTGAGTGTTTTTCAAGA
CCTCCAGATTACGCGTAATGATTTTAATCCTCTCAAAGAAAGTTGTATAAAGGAGAATTC
TTCCATTATCTCCATCATATTCCTAAATAAAACTGGCATAAAAATGATTATGGAGATATT
GCAATTTATGATGAAAGCGATGAAATTGTGACGTCATTCCATCCAAGATACGGCCGGGTT
ATAGTGATGCGATGCGGAACAAAATATCGGATTGGACCACCATCTTTACGAGACATTTTA
CCTTTACATTTACGGTACATCGAA
>cap3_Contig57
CGTGAGCTGGGTTTAGACCGTCGTGAGACAGGTTAGTTTACCCTACTGATGAAGTGCAAA
TGCCAATTGTCTGAATCTGCGGTTCCTCTCGTACTGAGCAGAATTACTATTGCAACAACA
CTTCATCAGTAGGAGAGGAACCGCAGATTCAGACAATTGGCATTTGCACTTGCTTGAAAA
GGCAATGGTGCGAAGCTACCATCTGTTGGATTATGACTGAACGCCTCTAAGTCAGAATCC
GTGCTAGAAAGCAATGATAATTACCTCTGGATAATCTTAGGCGAATAAGAATAGAACAGC
TTCAGTTGTTCCTGAATCTCAATGCACTGACCTAGAGAAAAACTAGTGAGGTGCTGTCAT
TATCAAATTCTAAAATTTT
>cap3_Contig58
TGAACTGATTCATTCAACATTTGGATTCTCTGATATGCAGCATGTATTGGTTCAAAGCGC
AGATAAATGGTTGGTTGGTTGGTTGGTTATCCGACTCGTATCTTCTAGCTTTCAAAATCA
ATCGAAAATATAATTTTGCTTAGAATGTGTTACAGATATCGAAGAATTATCCCGGAAAAC
CAGAACGGGCTTTATGTTTAGAATTATATCGGCAAAATGATCTTATGGAATAACAAGGAA
AAAAATAGTTTTTGATATGTGCGCGAGTGCGTATGTGTGTGTGCGCGTATGTGTGTTCGG
TTTTTTTTGTTAATTTCTTTTTTTATTACAAATTGTAATCATAATGATAATTTTGT
>cap3_Contig59
ATTTTTGCTGTTCATCATGTAAGGTTTCCTTGCAGAATCAAGCATTCGTTGAAGAAAATA
ATCAGCTATTTTGTGAGAAATGTTACAACCAGTTTTATGCTCCTAAATGTGCCCATTGTA
ACAATGCAATAATAGGGAATTGCGTTAATGCACTCGGCAAAAGTTGGCATCCTGATCATT
TCATATGTTCCTTTTGCAGTAAGAGTTTTGGTAACGATGGATTTTTGGTCGATAGCGGAC
GTCCCTATTGTGGAAAATGTTTTGAAGATTTATTCAGTGTTAAATGTGCCAAGTGTGCGC
AATCTGTGACTGGTGGTGAAAAGTATGTCGAAGCTTTAAATAAAAATTGGCACTCTGAGT
GTTTTAATTGTA
>cap3_Contig60
GTTTTTGGAGCGTTGCTAGGCATCTCCATCGTTTGTATCCTAGCTGTCACGTGTTACATC
CAAAATAAACCCTTCAAAGGCGCAAAAGAATTTGTCATTGATGAAGAGTAATGGCGTCAT
GATTCCTTTAACAGTCGGAACCCGACTACAAACAATAACAATTATCATTCAGCCTGACGC
CAATTGTTTACATGTTGCCTCCAAAACCGCGGTAATAAAACTCGTTACTACAAATGATAC
TAAAAGTCACAAATTGACAATAAAGATGGAATCGATTTCAGGCCTTATCAAAAGAAGCTC
ACGATCGCACGCATGCGCCTCCACATGTACCTAAAGCGTCGATTTAACACGCGCCTCAAA
CGTATTTCGAGCATGGCGTACTATAATAACATAAAAATCTAGTTCAGTGCCTTCCGGCAA
TTCGTTTGACTCTATTTTTTCAGAGCAAGTTTATATTATCAAATATTGTCTTTAGAATTT
ATTTTCAAACAAAATGGTTGACTCTTCCTATAATTATGAGGTACTTTCGTTTATACTAAA
G
>cap3_Contig61
TTTTTGCCACCCTGGTTATTGCTATCATATCTTGTCTTATTTATATCACTTTTAAGGTAG
TGGGTAGTCACATCAAATCATAAATTGATTACTAAGCAGTTAATATGAAACCTTACGAAG
TTCCATGAGATGTGCGCTGAAATTTTTTCACGCTTAAACTAAGTATGTTATGACGTTATT
TCTAAATTCTTTCTTGAAATATGCTTGATGTTCTATTAAGTGCATAGACAGGTAAATGTA
AAATGATACAAGGTAATGTTTTTGTTACTATTATTAATTTAAACCCTGATCTAAAGTTTA
CAATATAGAAGTATGAGGTACAGTATTAGCATCCCCATTTCAATATAGTTGAGTCTTATA
TCATAATCAGGTCAACTCTAACTTTTTTTTTGGTTTTTGGTTTGTTTTGTTTGGTTTTGG
TTTGTTTTTGTTTTGGTTTTTAGTTTCGTTTTTATTTTAGGTTTTAAGTTCTTGTTCAGT
TATAATACTATAATCTATTTAGTTTTCTATTTGGTCACTTCTTGTTTCTTTCTACTTCTA
CGTAGGTTGTGTAGTCTCTACTAATGCTTGNGCTCGTTGCTC
>cap3_Contig62
TTTTAAACAACGATCAAACTGTTTACACAATGATGATAAAAGATGTGTGAAAGATTGGTA
GCATTAAACTTTTGATTCTTCTAAATCTGTTTGCTTTGTTTATTTTAAGGTAGCACGATA
CCTTTCAAACAAGTTTGAAACTGTTCAGGAAAAAGGTTATTTAACACACTGATTATTATT
TTTTCTTAATTTTTTTTATAAAACTAGTGAAGACACTTATATGTGGACTGATGTACATAC
AATAAATAGATTTAAAACTAAAGAAAATATGGAAAAAATCCCTTCAAAAAGTTAGATTTT
TTTGGACTATTTTGAGCTCCAACTCACTAAATAATTTAGATATTTATCAGATTTTTGCAT
CATAATGATGAGAAAAATCAGTTCAATCAAAGTGTGTCTCAAATTTTTGAAATTTTGGTT
TCCTGCGATTTTATCATTATTTTTCCAATATTTTCAATCAAAGAAATATACTATCGTCGA
GAAAAGTCCTTGTAATTAAA
>cap3_Contig63
AAGCATTGACAGACAGTATTCAAATAAAAAGGATTAAAGATAATGTAGCCGACGAGACCG
ACATGCAAATACAGAACCACGAGTTAAACATTCACACGAATGAAAGTGATGTTGAGCAGG
AACAAGACGCAGATGTGGTCGGAGAGGAAGTGGACCCCTCCACTGCCGCATCGGCTCTTC
TACAAACAGCTCTTGACGAAGGTCAGTTGCAATTGATGCAAATTGCTGCTGCATCGTACC
GCCAAGAAGTTGGTTTGGAAAATTGCCTTTGATTAAGTGCATTAAGTAGTATTTATTTAT
TCCATTATTTTACACAGC
>cap3_Contig64
CCAAACTTACTAGCATCTCCAAGCAAAAGCTGGCTGCTCATTATATACTCGTACAAAGAT
TTCACCAACAATAAGTCTTTAGCATGGATAGAAAATTGAAAATCAGATCCAAATGTTTCA
TCTTCCTGTAAATACTTGTTTGCTTGTTTCTTCGCCAGGAAGTCCAAAAGTTCCGCCCTT
GACACATTGTCCCATATCAAGTATGGATTCTCTGTGTTCGAATTCAAAATCTTCAAGATC
TGGTGAGGTTCTTCTACACCAAACTTCCTTGCAACATATGGAGTGAGGAGTGCAGATACG
GAACTTTTGACAGCAGGATTATCTGGAGTCGCTTTATCACCAGCATCATATCCTCCCATC
CTCGATAGAGCCTTCACACTAAGTTGAGCAAGATTGTTCGAAACAACCTGCTGGTTAGTG
TCAACATTAGCTTCCACACCACTCTCATGCAATGTAAAATCATAGTTGAAGAGGAATTGA
AGTAGGTTCCACAAAGCTCCACACTGTAACAAATTGGTCTGTAGCCAAAAGTCCACTGAA
AAATTACAAATACATTCAGCCACTACACAAGACAAAGCACTGAGATTCTGCCAAAATAGA
ATACTACACAGATTCTTCACAATAGAAGGTAACTCCGTTATTTTCTCCCTACAACCTTCA
AATTGAGCAGCTACTGTGAAGCACCTTGTAAGATGAGTGCTGATCAGGACTGGGATTTCT
TTCGAACTAGTTGTGTCAGAAGAACTTGCGTGCATCTTGAAATGCTTCTTGGAGGACTTC
AATGCCTGCTTCTCTCCTCAACTCTTCAGCATTCAATGCAG
>cap3_Contig65
TTTATATCAGTGGCTGAAAAATAACAAATTAATGAGAGCAACAAGTTAATTTGTTGAACC
AACTTGAACCAATCCTACTCATTCTACATCAACACTTTCATTAACAATTTCATTAATTGG
AACCAATCGAGAACAACAAATTTGAAGTTCCAAACATATCCAGCGAAAAACCAATTGTTA
AAATTTCTTTATGTACCAAGATCATAATCAAAGACCACACAAGGGAAACCCAATTATGAT
ACCCATCATATCATGCACCTAGCACCAATGAATCAATGACCAGGTCACCATTTCTCAAGA
CGGTAACTCAATCAATCAAATACGTTATAATACTGGCTCTTTTAATGAGAAATGCTGCCA
GAAGTGCCTTCATTTTAATCAAACATATATAACTGTACCACTCCATATACACAACAAGCC
AAACAGTTTAATTCCCAAACTG
>cap3_Contig66
CCCATTTCAAAGTTTATTGTATGCATTGATTTCATCCCTATCATCCAAATATCTCTACCT
CAACAAGATAAAGGACTTGATCTTGACCTGTTACTTTAACTTGAACGTGCTGTGCAATTG
TTTCAGTATCACACGTGATCTCAACCATGATGCTTGCTGGTGTACCAATCATTTTACAAA
GAGACCAGTCATCTGAACTTGTTAACCGGGTGTGAACTGCTAACAGAGGATATTGGTTCG
TTTCAAAGGCGTACTTGTTGAGATAGAGTCTGATCAATTGAATTTTCGTTGGTCTTTTTA
AGTTCACCTCCCAATGTGGATTTGGTTGCGAACCTGTAACGGAACGAGTCGTGTCTTTCC
CATCATTTGCCATTTTAGCGGAATTTTCCTCTGCACCATCACCGTAAGTGGATGGCTGTG
ATGACGGTTTTTCCAAGAGCCAAATTATTGATCGTCCTGTTGGCTTCCCCTTGACACGCA
CAACCTCCATGTTGTGGTCGTTGGGGAAGAGCATGTGCGAATCATCTGCATTCCTATACA
ATCTG
>cap3_Contig67
GCAAAATAAAATATCGACTGTTTACCAAAACATAGCCAAGAATAAAATTCAAGGTGTAAC
CTGCCCAGTGGTTAATAATTAGAATAATAAACCACTGGGCAGGTGACAAACTTTAATTTT
GATATGGTCTCTAAATTAAAATTATCCTGTTATCCCTAAGGTAGCTTTTATC
>cap3_Contig68
CTCGAAAACAGAGAAGACTTGCATGCTTTTAAAAGAAACATGAAAATATGAAACATCAGC
ACATCCAAAATGTCTTACCAATGCGAACAAGGCAAAAATACTGCCAACAAAAACATAGCT
AACTGCACATACATACATACCTCTGCACTTGTACTCACATACAATTCAATGAAAACAAAA
ACAAACAGATGAATACTCAAAAGCATAAAGAACGTTGTTTCTCTATCTCTCTTTTAGTGA
TGTGCAC
>cap3_Contig69
CCTATCCCCTGTGTGCCTTGACATTGAAAGGATATTCAGATGCAGATTGGGCAGGAGAAT
TGGATACTCGAAAGTCAACATCAGGATACTTGTTCATGATCAACAATGTTCCAGTCAGTT
GGAGGAGTAAACTACAATCCTGCGTAGCATTATCCACTGCTGAAGCGGAATACATGGCAT
TAGCCAGTGCTGCCCAGGAAGCAATTTGGATGCAGAAATTGATGTTAGAATTGGGACAAC
AAGAAGATGGAATAAGACCCACTATCATTTACGAGGACAATCAGTCAGCTATTAGCATGT
CAAAGAACCCACAGTTTCATGGAAGA
>cap3_Contig70
AAAATTCCCACCCGTTGATCTTGGTCCTTGATAAAGTCTGCCGTTTCCAGATTGAAATTG
ACCAATTGGAAGCTTGCCAAGACCCTCCAAATCTCCAAATGCCATAATATGACTATGTTG
TACTTGACTTTTGATGTTGAGGTATTGCTTCCATAAACTATGTGTGCTGAAATCATGCGA
TTCTGAGTCTTGCATCCATCGAACACTAAATTCGTCACCTAAAAATGTCCTTCTGAGTCG
GTCGTAGTAACAAGCGTATGACGATTCCATGCGGTTAGCAGCAGTAATAGCGTAAACATT
AAGGTTCGTAGGGAGCCGATTGTAGAACATTGATCCAGAGAAGCATGCTTCGATATAGAA
GACTAGCTTGGAGTACCTTTTGTTCTTGTACATGGATTTGATAGCTTTATCCAATTCCCA
GGAGCCTAAAACATCACCGTCAGGGAAGGCGATAATTTGTTTGTTACCATGGTCAGCATA
ATACACGAAAACGTTATCGTTTGGTCCACTTTCAATGATACGACCACTACCAACACCTTT
CATGACAGAGGCTTTTCCTTGTAAGACATTGAGAAAGTTATCTGGTGTGACATCCCCCTT
TTGTAATCGATTTTTACACCTTTGTAGACGTTTGGTCCATTCGGCTGGTTAATGATGTTT
CCTGGTACGGGATTTCTTGTGTTGTATGCAATGT
>cap3_Contig71
CTGGCAGTGGCGGATCTGGAGTATCTTCAGTGTCGTCATGAAGACACTCATTTTTGATGA
GAGCAATTTTTAGTGTTAAATTGTGAAACTAGGTTCAAGATGAGGACAAACACTAAAGTG
CTTTATTAAAAATTTCTCACAGCTTGGGGTAAATACCACGTAGGCAGACACTCAGAAATA
ACGCCATAGGCTGGGGTATTAACGACACTCCACATGATTATTGCGTGAC
>cap3_Contig72
TTATACTACATAGAAACATTTATAGACTCGCCGAAGAATGATTGTATCGGACTGGTAAAC
AGATCATATCCAATTGCATAGTGAACGCCTAAACCAACCATTCACATCGTACACACCTTT
CAAACTATCCAAAATAACAGAAATGGAAACAAAAAGTCCAACTAGATAGGTCACCTACAT
AGAGAGGACAGCACACAGCATACAACGAAAAAAATGCTTTTAAAGGACACTATGGAAATA
TTATATAATTCCACCCCAATATGTATTTGGCTGAACCATTCAAGGTCCAATTACATAGTA
ACAAGCACCAAAATAAATCTTATTTTAAAAAGGATACTTCTATTCTCTTAGAAGTCGGTC
ATTTTTTTCGGCTGGCGCAGAATTTCAGACCCCTTAATTATTTTGCAATA
>cap3_Contig73
GAAAGAAAAATTGATCCTTTAAATAATCAACCAGAAGCCATCTGAATAAAATGTCAACAT
GCCTTTAAAATAATCCAAATGTCTGATGGCAATTTCAAACGAATTAAAATGGTTTTGATT
ATCAGAGATTGTCAGTCATCTGATAGCATCCGGATACCCACTCAAGATACCACCAGTCTT
CCGGAAAATCAATCTCAGGCGTTCACACATTTCTCCGTGTGATAGCGTTCAAAGAAATCA
TTAGATGGTTATTTGATTGCAGATCAAGTCGATATCGCCGGACTTAACGAAGGACGAGAA
AGAAGGTCGGGACATCTCAATGTCACATGACACTAACGATGAAAAAGCTCGGTAAGGGAC
GGGTTTATTGCGGTTGCATTGCACTTCCAAAGCCGAGTCCAATACCGGTCAATCCTCCTG
CACCACGTGACAGTTGGAAAGCACGCGACTTCTCATATTCTTTTCTAAATCATCGAGAAC
TTTCCGAC
>cap3_Contig74
AGCTATTGAAAAATACATTCAGCATCCTGATCTCGTTTAAATAAGTTCAAATCAGCCCCA
CTAGATTCGATTCCAGTGAATATTCTAAAATATCATTTTGATCTAATCGCTCCAAAGATT
GCAATAGATGTTAAGCATTCAATCGAGAAAGAATAATCGATACAGGAATTTCACCATAAC
ATCAAAAACTGTCAGATGTTTCGTTTTGAAATTTTCTGTGCTGATAGAAGGCGTTATGTC
TTTTTTGATCTTATTTGTCAAACTATTTGGCGAAAACAATGTTTGATTGATGGAAGATTT
GAAGGACTCGGCTGCTTCATGACTTGTAACATTTTCGGCCTTAATCAACAACAAGTCGAG
AACAATACCGCCAGGACTTGCACTGATCAC
>cap3_Contig75
GCGGTTGCATTTGTAGTTGGAAATTGTTTTCTCCGCTAATGCGCGAAGATCGAAATAGAA
TTTTGCGTAAACACTAGAGGGAACGTTGATATTGTATTGAAGAAGGTCAAGAAACACTCG
CTCAAGTTCGTTCATATCTTCAACTGTAATATCCCTCAAGATTTGACAGTAATCAACATT
CCATACTGCTTGATCGTCCCAAACTTTGGAAGCCAAGAGAACAGCTCCTAATACAATTCT
CTTCCAGTTACTGGGGTGAAGGTCAAGTTCAGCATATGTAATTAAACGTTCCAAGTAAAT
AAGAGTGATAATTGCACATTCTGCTGTCAGCTGCGCTGCACTAAATAAATTCTTTATAAA
ACGGTAAATATGTTTATGCTCAGGATTAGTCCTATTATAATTTTCCGGTACCGGTTCTTT
CGTTAACGGATGAAGTCTCTCGTCAAATATATCCATTAGGAAAGCATCCGAATACCGATT
TTTCTACGTGATAATATATAGCTAACGAAACACATTTAACATCATCTTCAAGTTCGGTTG
TACTAGCAGTATTATCAT
>cap3_Contig76
CGTGGGAAAATGTCGCGCATAGGTTTGCGCGACATTTATCAGGAAAGTCGCAGGAATTTA
ATGTTGCGCATAGTTGGAAAATGAAAAAGTCGCAAGAATCAAATGTCAGGGAAAACCTGG
AAATTAGGTATTAATTTAAAATAGTCGGGGAAAAGGAAGAAAAAGTCGCTGGAAGAAAAT
GTTGCGAAAAGCCGCGCAAAATATTTGTGCGACATTTTCTCCTGCGACATTTTCTCCTGC
AAACTTTTTGTGACAAAAAGTAACTGTTTACC
>cap3_Contig77
CTGGAATTGGTGCAGGAGCTCATGCCAAGTAGGTGCAGGTGTACATGCAAAGTTGGTGCA
GGAATCCATGCTGGATTTGGAATCGGTGGAGGGCTAAGATTTGGAGATGAACAAAAAGCC
GATCCTGCTAAACCTGCCAAACCACTCTTCGGATTAGGAATTGGAGGTGGACTCCATGCT
GGATTAAAAGTAGGAGCCGGACTTCATGCTGGTGCTGGATTGAAGGT
>cap3_Contig78
AAAAATTTGCGAAAGTTGCGAGGAAAAAGATTTGCAACGTTCTCTTCTTGCAAATCTTTA
TGCCTTCAAAGTAATCGAAAGGAAATGAGCAAGACAGACATACAAACATGAAGACAAACA
GACATAAAGAAATAAAAAATACATTTTTGACAGATACTAATAATTATTTCACAGCCACTC
TTTGAAATGCATATCACCATCAGCTCGGAACTTATCTAAACATGTGTGATCCCCAGCCTT
CCAACATTTCAGAAACACACCCGCATTGTATTTCGCCCACCCCGATCCTGTGCCCGTCGA
AAACCAATGCTCAGCATGTCTATATATCTCAGGTCCGTACCGATTCCGAATATACAACCC
CGGATTTTCGGGAGTGTAAACCCAA
>cap3_Contig79
CGAGGTCAGCTTCACACTCGTCTTTCAGCGCTTGCGATTCACCTGCTTGTTCGTTGGCGA
CCGCTTCGTCCTGACACACGATCTCCCGCTGAGCTTCGGCGATCGCTGACTCCTTCTCGA
TGACCTTCATCATAGATTCATTTTCTTCAGAAGCAATAACTAACTTAGGTTGTAACTCTT
CCAATTCGACTTGCATTTCAGCGACCTGAGTGGAAGCAAATGCAAGTTTCTCCAAACCAC
CTTCGTACCTTGTTTTGTTCTTCCACACCTCGTCTCGTTTTTGTGAGAGTAATGTCTTGA
AAGCTGAAATGAGTTCCAAGTAAGACGTTGGAGTCACGTAATTGTGTCGGCCAGCTTCTT
CCAGATACCTCGTGGAGTAGTTCAGCGCATCCGTGTGAAACTGCTGACAAATGCTGACGA
CGTTTTTCCGTTCCTTATCTTTCAAACTCACTTTCTCAAGGAACTTGTACGCCACCATTT
CCAAAGCATCAGCAGGCCAAGGCTGGAACCAATCAATAGTACAGCAGTTGATGAGCGACG
GGAACTGTCTCAACCGGTTTCGGAACGCGTCTCCGATCGGACTCATACACAGCAAGATGT
GGAGGTTGTCCTTGCACCGGCTCACGAAGTAATTGAAGAGGGCGAGCGGGGAGAACTCCT
GGTTCTTGTCAACCGCTTGCGCGACAGCGAACGGACGAACAGCCTCGACTCAACTC
>cap3_Contig80
TTTTATGTAATGTCAAAAATATCGGTGGATATGGAAGTGATTTTACGCAATATTAGTGAC
GTCACAATGACGTCGTGTCAACTGGAGTGTTTGCGGGATTCCAAGTGTCAGACGATCGGA
TTGACGACACGGGAACCAAAAGAGGGTGACGGTGGTAGAGGGCTGTACACCTGTCATCTT
TTGAAGAGAAGTGATGTTGACAACGCAGAGAAGGACAACACGGATGACAAAATGATGAAT
AATAACAATATGGAGTTGTTACAGATCAATAAACTTGAAGTTAAAAGAATGAGCATAAGT
AAATGGAAACGATTCACTTTTGTCACTGCATGCGACGAACGAGAAATCAAGAAGAAACAA
TTATTGACAACACTAAAGAAGGGAAAAAAGAAAACCATAGTAAAGACTAGCTCCAGAGTT
TGATAACGATTTCTGTTTTGATGTGGTGGTCAGACTGAAAATCCGATCTGGAAAATCGAT
GAAGCAGTGAAGTCAAAAGCAAAAGGATTGGTTCATCCGAGCATATAG
>cap3_Contig81
CGAATGACTTTGAACCTGTATCTGTGTCCTGCAATTGTGATCCAGTGCCAGCCCATTTTC
ATCGAACCTCCTCCGAACCGAACCATGAAATGATACACTCTTCCTCCTATCTTTATGATT
GCTTTGCCTTTGTTGATTCCGAACTTGATGCGATGGTGGTGATTTATCAACCAGCCGAAT
TTGTTGCCTGGAGCAATTTTGAATTTGTATTTATGTCCTCCAAGTGTGATCCAGTGGAAT
CCCATCTTCATTTTCATTGGTCCGCCACCAAATCGAATCATGAAATGGAACACTTTCTAC
CAATCTTGATATCTGCTTACCGTTCTGATGATAAACTTGATACGTTTTCCATGATAGACT
GAGTCCAACCGGAATTTTCCGACCTGGAACTAACGTGTGAAC
>cap3_Contig82
TTTTCTTCAATAAATTTGTTGACAAATTTGATGAGAGATATGATTTGTGGTTTTCCATGC
AATTTTTTGGCTTCTGCCTCAGCTATTTTTCTGATTGCATCAATAACTTTGACTGGAAAC
ACCTTACTTTTCACTTCTAGTAATATTGACTCATTTGGATAATTTTTAGGAAATTGAAAT
TGACACATACATTGTTTATGTTTTGTTCTAGTGACTTTAATCTGGACATTAGCTTGATGA
CAACCAATGACTTCTGCTGTTGGTACAACTTTGCTGATGCGATCTTTCACGTCTTTCAAT
TCTTCTTGTATAAAAGAGGACATTTTATCTTACATGTATGTACGGATAAGATCAAAATCA
AGTGTTTAGCTAGTTTTCGTGGGGTACGAATATTCCAACACCTTAGAGAGGATTTAGGAA
TTTTAGATCTTAATAACTTCTGGAGGCATGGTACTAAATGATAGCATCTAAATCAGCGAA
ATATTAGAAAGAGAGTAAAA
>cap3_Contig83
GACAAAACCAACTATACATTAGATGACAGTACGGTGGGTGTATGGGGAATACATTTGATA
TCATCATGTTGACTTCATAGTAGATAATGTAGTTGATGATGGTTGTATGAGTGAGAAAAA
ATCCCTAATCTCGAAAATAGTGTAGTAGGAAAACGGGATGCAGCTAGATGGAAAATTCAT
TATCTAGTAGAAGACCACAGCTATAGAAGGCAATTTCCCATCAACTCTTAATCTAGGGGG
AGCGAATTGTAGCGTCCATAGTTTGGGAGGAGGCAGTAGCTAGCAGTGTAGTTAACATCA
AATTTGAGAAATATCTCAAATTTCCAATGTAAATTCAATGGGTGAATCATATTTGCAACC
AAATGTTGATTTCCTTGCCTTAACCATTATTCCCATTAGATGCGCAGTGAACCACCAAAA
CTAGTGACTTAATAATTTTTGCGATAGAAGG
>cap3_Contig84
GCAATTTGATGATATATTATACATAAAACAGAATCAAAGACTTAAGAAAATAAACCTAAC
TGAAGACATAAAACAACGTATAATACGTTGGAATCATGCTGATATGATGCTGTATCAGCA
TTTTAACGCGTCTTTTTGGAAAAAAGTCTCGAAATATGGAGAGCAATTTTGGGACGATGT
CCGTGAATTTAAAAAACGTAATCTAGAATTTGAGAAAGTTTGTTCACCAAAGAAAATGAC
AACAAAAGGGTTCAAGATAAATGTTGATGTAAC
>cap3_Contig85
AAAAAATTCATATTCACAGTTAGAATGATTAAAACAACTGTGAATTGATTTCAATTTTTG
AGAAACAGTTCAATCTTGGTTTAATTCACTGCGATGATCTCCAAATCTTTATGGACAGGT
GTAAACGGGAAATAGTGTGGAGGGTGGTTAGTCATTGATGATTAAGAAATAGAATCTTTC
AATCCATTGCGTCTAGATATATGTATTTTAAGAAATAGGAAAGGTATTTCCCCTGTTGTA
GATATACAAAATAATCAGTGACATTAGGGC
>cap3_Contig86
AAAAATCAAAAACCTCGTTCGTCGAACAATATCGAATCCATGTATTAAAGCCACATGAAC
ATCCCATCTTGTTGTTGCCGTGGCAATTTGTCGGCCATCTTGATGTTCATGTGGCTTTAA
TACATGGACATCAAGATGGCCGACAAATTGCCACGGCAACAACAAGATGGGATGTTTTTA
AATTGTTTATCATTTTGTTTATATTGAGTAGTGGTGGTAGTAAAATCGAGTTGAAAATGC
CTGCTGTTTGATTGGTTCAGTATTTCTTTGTGTGTAAT
>cap3_Contig87
AAAACATTACATACAAATACACACAGATGACGCACGAAGCCAAAAAGTAGAGGATGGGTG
AGAGATGCATTAACATACAGGGGAGACAGGTGTTACGTCACGGCTGCACTAGGAGTCACA
TGCACCTTTTTAAAAGTCTACACATGCCCAAAAACATTCGTACGCATTCAACTGAAAAGC
CCGTCAGTGTATACAGTCCCTTCACAAATCTATACAAATTCCACTTACAGTGTACATGCA
CAAACACACATGACAAATAATTAACCCACATCAACACAAACATGAAACAACAATATATAT
TTTAAGGGCAGAATCATACATTGGACCATTATTCCTTGTAAAAGAAAACAATAGATCTCG
ACCAAATATCCACAGACACACACATGCCGAGCGAAATTACGTAAGTATAAACCACTCTGG
TATGTTGTGTATATATTGATACAGGTAAGACAAACAAAACAAAGGATTATCG
>cap3_Contig88
CCACAACAGAAAGTTTTTTAAAGGACAAGCGAGTAAACACGAAAGAGCAAACTTCTTCTC
GAGAAGAATAAACGAATGGGACGGCCTTCCTCCCAAGGTTGTCGATGCACTGCCAATCGA
TTCGTTTAAGCGTCGGCTTGACGAATCGATTGGCAGTAGCTATACGACAACCTTTGGGAA
GGAAGGTCCGTACCCTAAGGTTGTCGGATGCACTAGTCCAATACG
>cap3_Contig89
TTTTTAAGTCAGTCATTCTTTATGACAAAATATTCACAACACATAGAATTCATATGAAAA
GATACATAACAAAATATCAATGTTTTTCATAATATTTATTGTATTTCCAACGGTACTGAC
GGAAGCGTGTTTGCATCGAAATCATCGAAATATGGATGCTGCATAGCTCTTCTAGCTGAA
ATTCTGTTTTGTGGATTATATGCCAAAAATTTCTCTAAAAGATCTATTCCATTTTTGTCA
AGATTTGGTATGATGGTTTGCAAATCTTTTTTCTTCCATTTTGGGAAAACAGATTTATAT
TCAGGAAGTTCTTCAACACCTTTCCAAGTTTCATTATCTGGTGTACCAAGTTTTTGGAAT
ATTTTGAATAATTCATCTATTTCTGAATCTCCTTGGAAAAGCGGTTTCTTGTTAGCCATT
TCAGCAAATATACAACCAATACTCCAAGTATCAATACCAACTG
>cap3_Contig90
ATTGGAGCAAGCATGGGAGCTTTCTTGATCCAGCCTCAACTTCATTTGATATATGAAAGG
GAACAGGTAACACACTAAGGTCTGTAATAATTCTAGGTTGAGGATACTTCCACATGATAA
TAGGTGAAAAACTGTAATGATCGTCAGTGAAGAACAATTCATTGTCTTTTGGTGCCATCT
CTTCTTCTTCTAATACGTTGTATTTGAAAGAACCATTTCGTAAGTCGTCTTCACTCTTCT
CAAAGCCAACACGCCACTCACTAAAATCTTTCATTGAGGGAATGCTGGTGTCAGCATTTT
GTTCAGCATCCACCCGCATTATATTGGACATTTTGGTTGACAAATCAAGTATCAATCTGT
AAAGCTTCTGATTCACATGTAGTTGAAGCAAACCGCATTGAAGGAACACATAAATCTTCG
GAAATGAACTCTTATGCAAATTGTTTCCACTATGCAGAGAGAAATTAAAGGCAAAATTCA
CATTCATATTACATGGCATTAGAAGAAGAGCCTTGGTTCCACATTCAACGAAATATATTT
CTGCACCAGAGAGCTGACACTCAATATTGATGGTATCAATCGAATCTTTGTTGATAGAAT
ACAGTAGGTTTGCATGAGATTTGACCTCTTGGCAAGAAACATTTATTGAAACATCATTCG
TATTTTCCGAAACTGATAAGGATGCGTAGATTCGCTTACTCGCAAAGTAAATATTCTTAA
TTCTGAAAGAAAGTTGACTCGATTTCTTAGTGCAATGTACATCATCCTTGATATTTGCAT
C
>cap3_Contig91
AGAGAATTGATGTACGGGCTGGCGTTGAAGAATGATGAGATCTCTCAGGCTGATGTGAAC
CAGATCCGGCTTGCTCTTCTCGAGACGTTGGGACAGGTACAAGAGGTGGTCCCTCTCATC
AACAAGCTGCAGTTCGGCGCAATGGCCTACCTCTACGGGGTGTACCAGTTGGAGAGTCTT
CGCATGCAGATGGACTCGAGCACTTTACAGAACATGTTCTTGTACCTCGAAGATAGGGCA
GTGCAAAAGGACAAGACAGACGTGTGGCGGTGCATGAGATGTGGATACCCGGGATGTCAA
TCTCACGGGATAACAACTGG
>cap3_Contig92
CGTCTTTCTATCATCATAAAAACTATGGAACATCAAAAACTTTAAGTTGATAAAAAAGGC
TAAGATGAAAAATTAAAACTCGATAAAAATCTAAAAATAAATAAAGTTTAGAATAGAGCG
GAAAACCCCGTTAAAACGCAGAAAATTCCACAAACAGAAACACAGGGGTCCCTCTTAATT
AAGTACAAACTTCAGTGTTAAACGAAGAAGCTGATTGGTCTACTAAGAAATGTCAATATT
TAAATTGAACCAATCAGATTTCCTATGACGTTATTTCCAACTAATCAAACAACATATAAT
TTGGAAACAATTCTTGAAACGAACGATAGATGGAAACTAATATGGCTGCGAACGTTGGCG
ACGATTATTATTGTTACGCGAGTCGTTTTGTCGCGTTGGTCCAAAAATTTCGAGTTATCC
CCTCGGGGGAAGAGGACGAGTTATGACGATTGTATTGATTGCCATGTGATTGGGTTAATG
CTTTGCATGTGCAT
>cap3_Contig93
TCGCTGGGTCTTGCGTTTGGAAGGTTTTGTCACAACCTGTGTGTCGAGAAGACAGTAGAA
GTGGACCAGTGTATTCATCACTCGACAACCTATGTTTTGATTGGTCGTGATAATGGGAAG
GAGATTGTCATGAAAACAAAAAGACCTTCGAACTTATCATTTTTCTCAAAATACTTTGAA
GGTGAGAATTTAATAGTCCAAAAATTGTTTAAATTTTGGAATCAGTTCAGGTTATTGAAA
TTATGCATCAGTTCAGGTTATTGCAATTAACATCATGAAGAAACTGAGTTGTTTATCAAT
CAGCGGTTCTATGATTTTATTTTATGTCTTGACGAAGCATCAATAAACATCTTTGTAGAA
GTACGTAGTCAATTAGTTT
>cap3_Contig94
GCTCGTACGAGAAACAACCAAATGCACGCTAATACAAACTCAGTATAATCATTATGAATT
TCAGCTATTAGTGGTAAAAGTGGATATAATACTGCAAATTCAAGGATGGAGAGTACAATT
GACTTTCTAGGACCAAGAAAGTTGCAGATTCTCGACTGTAGTAATAATTGAAAAAGAAAA
GTAATATGAATGCAATTGATAGTGTCAATCCAACTTTTGCAGGATTAAATCCTAGCCCGT
TCAGGGTTTTGGCTGTCGAAGCAAACAATGGATATGTTCCTCCCCCTGTCATAGAGTAAC
ATGCATATAAGATGCAGCCAATAAGACATTCTTTCGTTTTTAAAGCTTGCAAAATTTTTA
CTCTGCATATTCGTGAAAAAAGGGACATAAAGCTGTGACAGAACGTGTTTTCATATCCCG
CAGAAGGCTTGAAATCTCATCATTA
>cap3_Contig95
GCCAAATTGCTATATTTTCTATCGATCATACAATAACAGAATAAACTGTTTTAGGCAGGC
ATCAAGCCATTTTTCTTCCCAGTTATAGAGAAATACATTGGTTAGGATAGATCCTAAAGG
ATCCCCTCATTCCAACAATGTCCAACTGTATGTGATTTCCATTAAATATGAATAATCCTT
CACTGCTGATTGGAGTCCTTGTCCAAATTCATCTTTAGAGAATTTTTTGTACTTTTGTTT
TCTACACATGTTAATTGTCTAATAGTTTTTCTTTCGAATGTTTTCAGCAAGGTATTTTAT
ATATATGATGAGTATAATGTATCCAGTAAAGAGAGTGCTCGATACGCAATGGAGCGACCA
GTAGAATTATAAGAAAATTTCTCAATTCGCTAATAAAGTTTCACAAGGTTTGAAATAAAG
AAAAACTTGTATCTATTCTCTACTGAAGCGAAGATAGTGACCACCTCATTGCATCAATCC
ACCCTTTGTGTATCTGTCTCTGTATTTGTATAGAAATAGTATGTTCGCTATTTTCCGTAG
CGGCGGAACAG
>cap3_Contig96
CTGAATACCTGTTTAAAGATGGTTTACATTTTGGCATTTTGGCATTTTGCCTCCAAAACC
ATGCAGATGTTTTGTAAATATTACAATATGTAGAATTGAATGGATGGCTTAAACAAATGC
TCTTATTTCACATGTGTAAGCATATGCTACCAAGTTCATTGACATGAACTTGAGAATTCT
TGATTTTTCTATTATGACATACATTCATATTTTCCAAAACATGCATAACAGGTGAAAGTA
TCTCAAAAATGTGCAAAGAATTAACATGTCCTGTAAATTCTGAGATTTGACCTAAATCAT
GTTTTTTATTAGGTTTCTATCAAGGTTTCCACACCAAAAATCCTTCCCAGGGGATCATTA
TTTTAAGGTTGAAAAAATTAAAATTATTTACAGGTACTGCAAAATGTACTAAGAGAAAAA
ATGATGTTTCCATGATATTAGTAGAGAAGTAGAGAATTGACTCAAAACTCAAGACTATTT
TCATTATTT
>cap3_Contig97
GGCGCAGTACCAGAGTATCATCTCAGACCTGAGGGAGGAGATCACGAGGTTGAAATCACG
CTCCGCCGCAGCAAATGTAAACGATAAACAAAACTCAGGTCGAGCAAGCGTCCATAGCGC
CCACGTGATGACGAAATTAAAAGATGAACTCAAGTCGTGTTATAACGACCTGCTGGAAGT
TCGAAAGGAGATTATCCACTTGGAAGATTCGACGATGCAATACTCGGTAGAGTATCAACG
CCATCTCCTTACCATAGACGAGTGGAATCAAGAACAAGCACGCCGTCAAGCAAAAGAAGA
ATTGAAACCAGCAAACAAGAATTCAAAAACATATTCAACAAGCAACCGCATCAT
>cap3_Contig98
ATTTGATTTGATTGCATAGGTGACAACCGACAAAACGAAGTTATATTTACAGGTCGATGA
GGTTTTCGGGGTTCTTGATTCTGAGCATTTGGAGGAGGCTGACCTGGGAGTGTACAACTT
TTACCATTAACTATTATTTTACATCGAGTTGGATAAAGATTCTTCCTGAACAGCACTTGT
TTCTGCTAAACAAAATCTTAATTGTACTTGAACAGCATACTCAATCATTGATTTGACATG
ATACGATCTTGAATTGGGTTATAAGTTGAGTTTGATAAGGTGTCAAATGATAAACTAAGT
TAGTCTCTTGATAACCAGTCATTGTTTTTGAACTAAACTTGTCGATTTGATAAGTACATC
TACTATATCATAAAATGGTAATGAAATAAACTTCACATCTGGATGAAT
>cap3_Contig99
CCGAATTTACAATCAATTACCACACCAAATTGCCCGTATTATATAATACTACACGAAGAA
CATTAACATATAATCTATCTATCATTCCTTCTTTCTATTATATTAAAACATTGTAAACGC
CATTTTTTCCTGCATTCCAGAAAATCACAGTCCGAATACCGTTTCGGAAATCCCGGGGAA
CTCCAATATCATGTATATTCTGATATTGAGGAGTCTATCATAATAAGTCGTACGAAATCC
TATCAAGGAAGATTAAAAATTATAATGATATCTAAAACATTTTGTCGTCTTGGGAATAAC
GATCATCATTATCTCTTTGAGGAAAGAACTTCAAAGACACAAACGCTACACCCTTGATTC
TAATCATCTATTTTTTTCCTACAGAAAAGAGACCATTTTTAAAATGATTTCACATCCTTT
CTGCACACATCACCACATTTTTTAACCAATTCAAATTATACGCACTGATCTTTATGCGCG
CGCATTTATTTCTCTTCCGGCGCTTTGTTGATTCGATTTGATTTTTCGCACTACAACTGC
AG
>cap3_Contig100
GCTCAATTTGCTAATGTTTTTGCTCAAAACGAGCCTGACTCTCATAGCGTTCGGATGTAT
ATTTTAAGTACATTAAGCTATTGTAAATGCAAGCTGCGACGCAAGTAGGAAGTAGATAGT
ATGGAAACTTCGATCGAAAATATGAATGAATCAAACCAATCAATTGAATTGACCCTGCCA
ATATTGGGTGCAAACAACAATACAGCAGTGACAAGATTCCTGAACTTGGAGAAAAAGATT
GAAGATCTTAAAAAAGTCGTTTCTCTTCTAGATAAAAAACTTTATGCTAGAAAATCTTGT
TAACGATTTAGCTAAGAAAATGATGAAAACGAAAATATATCAGAAGTCAAGACGTCTATT
CAAGAAGGAACAATGTTGAATTTTGTAACATTCCAGAAAATGTCAGTGATGATCGTTAAA
GAAGAACACATTATAAAATTTTTGAAATCAATTAACGTTGATAGTAATAGCTACGACATA
GTTGCTGTTCATAGAATAGGGAAAAAATTAAATAATCGGTCAAGAAATGTTATAATAAGA
TTCGTCAACAGAAAAGATGCCTATAGATTTCTGAAGCTAAGATACAGATTAAAAAACTCG
ACTTTGTATAAAAGAATCTTTATGACAGAAAATCTTTGTCCTACCAATAAAAGGATCTTC
AATGCACTTAACAAACTAAAAAAATCTGAAGTAATTCATGCAGTGTGGTCGTACAATGGC
AATATATTTTATAAAAATAGATGAAACTGATGAACATCAAAATGCAGAATGCCTTGATGA
CATCTTATACCTATTTGATAACACCGTCAATGATAACGATCAAAATATAAATACAAAATA
ACGAAGCATCTCAAGAATCAGTTTTTCATATCTCTATTGTTACTTAAAGGTAACTTATTA
TATTTTTGATTATATTGTAACTTTCA
>cap3_Contig101
ATCTAACTTCACAACGACATTTTCTTGCTTCCTACTATCCATCGAGATGACACTGTTCGA
CACGGTTTGATGAATATGCAGATTATACATGAGACTACAATGACTGTCGTTGTGTAATTG
TACCGTTTTCGAACGAATTCTCCGACAATCGTTTCACCAAGACAGATATCACTTTGATCG
CAACTAATCGTTCCAGTTTGTCCTTCGCCGATAAACCGCAGAACGTATTTAACAGGATCA
GAGTCCAAGCGATCCGTTGAGACAAAGCACTTCGTTTTGAATAAATGTTTCATCTTCAGT
GAAGGTGTAAAGGACCATTCGTGTTCCTGGACTTCATTTGGTAGAATTTGAGATTCTACT
GGTAAAACTCTCAAAATGTTACTGTCGACCTCAGCGATTTTCCAATTCAATCTTAAAGGT
ACTCTCGATGTGTTATGAATAGTAACTTTCTGATGAGAAGTATT
>cap3_Contig102
GGCTTCATGATGCTAGATACAGCAAGTGGCTAAAAAGGATCATCCCCTTATCCCATTTCT
ACCTAAAATCCATCAAAATATTTCTTTAAAACTTGGCATGCTAACTATTTTTATCAATGT
TCAAACCGGAAACTTTACTTACAGGTATAATTTGCAGTAAAGAACCTTACTAAGTGTTGA
ACTTTTAAAATCATGCCAATTAAATTCTCAAATGCCCGAACAGGAAAGAGTTGGGATAGC
TTTTGAAAATTTTCGGGGATTTTGGTTCATCAAAAAAATTTCGGGGGCTTTTTCAGGGGA
AACTTTTCCATTTTCGGGGATTTTCGGGGATTTCGGGGATTTCGGGGATAAGTGGCCACC
CTGGAATGAAAAATGTAAAACTATAGTTAGTCCGCACAGACAGGGGTCATAAAAATAGCC
AAATTTATGCAGACGTCTGATGGATGGTCCCTGGGTAATTTTTTTATGGCATTTACATAG
CTACAGTAATTTAGTTAAAGTCCCTCATCATTTCTATTTTCTC
>cap3_Contig103
ACGTTTCAATAATGCCAAGAATTGATACATCAAAATTTGCAAATGGAAGGATAAAGTTCG
ATCGTGTGCTTATACTTGTTCAAAGAACACTTTTAGCTGCTGTCAATTCTTTGTTTGTAT
TTATTGGATTGATACTTATATGTGTTGCAGCGTACGGGAGAAAGGAATCAATCCTTGCAT
TACCAGTTTTCGGTGGAGTGATAGCATGTGGAGTGTTTCTGATTTTGCTCTCCATAGCTG
GTTTAGTCGGGGCGATCCGACATGACCAAGTGATTTTATTTTTCTACATGATTGTCATGA
GTCTTCTCTTTATTTTACTGCTAGTGTTTTCTGTTGCAGCGTTGGCAGTCACGCAGGGTC
AACAACATGAATTGATCAAGCAAGCTTGGAAGAGTATTGACGAGAAACAAAAACTAAAAA
TCGAAAGTACATTTAAATGTTGTGCTTTGGACATTGATGACAAGAAAGGAAGAGATTGCG
ATGGCAAGCTAGGGTATTGTTTTGAAAAGTTAAGAGAACCATTGGATAAAGCGCTTTCGA
TATGTGGTGGTATTGGTTTAGTTATTTCCTTCACGTTGATATTTGCTGTCTACTGCACAG
TTCGTCTTCGAAATCAGAAAGATCCGAGATTGGATGTGGATGCGTATATGTAAACAACAA
CAGTAACAGTGTACTCTTGCCGTTTTATATTATTTTGTGTTTTGATGTGATATCGTATTT
AAGTATCTACATCGTATTTAAGTTTTGGGTTTTAAGTAATACTTTTATGGCATTTTATCT
AGTTTTACTATTGATTAAGAAACTGTGACAGACT
>cap3_Contig104
GGGAGGAGGCCGATTTGCTGTAAATACTGTCATTTGTGGTACTATAGTAGTGCGCGACAG
GACGACAATAACAGGCTGTAGTAGTAATTTGTGGCAGCACGCGTGACAGGATGATATGTC
AAGAAGAGATATAGTATGCTATTGCTGATCGATCAGCACTCTAGCGCAGGGGTGAGAGTG
CGTCTATTGATGGATCAGAGTATTAATATTGTATTACTATTAGTTATTAAAGCGGGGTCA
AGGACGGAGCGGTGAGGATGCGGGTTAAAAAAACACACTTGTAACAGGGATGGCGATATT
AAGTGTCGATATGTCGATAGCGTTGTTTCGATAGGCACGTGGTGCAGTAAAATAATATGT
CCAAAACGCGATGTTGGGATTTCGTTGTCGACACACCAATAGAAATTTACGAATTAACGA
TAGTATTACTTCTGCATATAGATTT
>cap3_Contig105
CAGGGGTTAACAAGGTGGCAATTAATGATCCACAATTAATGGCAAAGTAAATATGGAAAA
ACTTTGAAGCTTCTCTTCTTGACCGCTTTCGAACTGATCACCACCAAATGCTGATACACA
TGGTTTGATTCCTCCCGTGCCAATAGCAATTAAAACTAAGCCAATAGCTGGACCGTACAA
TTGGACAGATGACAATACTGAGGGAACTGCAGTAAAGGATACAACAACATTACCTAGGGC
ATAAATTAATGAAATATATAAAATTGTCTTATATTTTCCCCAGAAACTATCAGCAATAAT
AGCACCAAATATTGGTGAAAAATAACACAGCATGTTAAAAAGCATGGTAAACTGCAGTAG
CATCATCTTTGTTCATTTTCAACATTGACATGAGATATATAACAAGAATAGCGTGCATGC
CATAGTACGAAAAATCTCTCGCAAAAATTCGTTTCCAAAGAATAAAATAAACTTGA
>cap3_Contig106
AGTAAAGTGAAAATCTACAGATCTATCGAGCAAATTTGTGTGTTCAATGATTGCTCAAGT
AACGTGAATTATAGAATCCATTAGGGTCATAACCAAGCCATTTATCATAAGTGTTTTAAG
GTAAATACCTACATATAAAATCCAGTAATATGTACCCTAAAATCGATTCTAATTAAAAGC
AAATATGAATGGTGTTGCTTCTAGTCTAAAACGATTTAGAAGGCAGTGGTATTACTTATT
ATTAAGTTGGGTGATCGATAATACTAGAATGAAAATCATGAATAGCTGTTGATTGACGAT
GCATCAGACAATTTTTTATCTCGGACAGTTAACTTTCGTCTCCAAAACGTATAACTGCTA
ATTCTGTTGTCATCAGCTTGTTTTCGCAAGCCTTCGTAAAGTTCCACTTTCCTCATAACT
TCGTTATCATAAGCTTCTCTTGCAGTTCGATCTTTTGAACACATAACAGCATGACCTCTG
TAATCATATCCAGCAAAGAATTTGAATTGCGAAAGGTGTTTTCTAGTTGATTCATTACCC
ATACAAACCATTTCATTACTACGATGCCTAATCGGCCATTTTCGCTTTTTTACTACCTAT
TATTACACTG
>cap3_Contig107
CTTCATGATATTATGATTTTCTTATCATACTTCGATGGTACATCTTATCCAATAACTCCA
TCGGGTCACTCTACAATCAATACCTAATTATCCATTTATCACCAATGGGTCAAAAGATGT
CTTTTTAAACTACTAGCAATATGGAACGTTTTATCGCACTGGTTGCAAGGATAAGGTTTA
TTTTCGTTATGAATACGCGCGTGGATTACAAGATTACTATGCCGTCTGAACGTTCTCTTG
CATACCTTGCAGCTGTGCGGGTGAAAATCCGTATTATGAGTCATAATATGACTATCCAAA
TTGTCTTTTCGATTAAATTCTTTCCCGCAATCGTCACACTTGAATTGTTTGGCACCTGAG
TGAACAAAGGAGTGTGCACGCAGATGGCTGATGTCGTGGAACGTTTTCCCGCAGGGTTGA
CACTTGTATGGTTTTTGTCCGGTATGGATTATACGATGACGCTTTAAATGGAAGCTGCGA
CCGAATTCTTTACCACAGTCTTTACATGTATAACG
>cap3_Contig108
AAGACACACTTCACACCAATGGATCTGAACACAATGAAGAAGGCAACAGATGAAGATCTA
TTTTCAGATCCAACTGCTCAGTATCATCTCCATGGACTTATGAGTTGGTTGGCTCCAAAT
ATTGATGAAGCACATTTTCCTGTTAAGAATTTTAGTGGATTTCTACCTCCTGCACATGTA
GAAATTTCTCCTGGATCAACATGGCAGCTGATAAGAACTGAACTAGCAGGGATACATGAA
AATACTCAACACCTTGGAGGTAACAGATATTCACCTCCATATCCAGAAAATGACATGGAG
TATTTGTTACATTTCTTGTTAAGCATGTTCCATCCAAGACCCTTCCTTCACATGAGGTTT
CCTCCTCGTGGTGCAATAGCTTCTATTCAAGCTGTTGGTGAAGAATATTACACTATCATG
TTTAGGGTACATCCTGAATTCCAGCTGAATGAACCCTCCCCGCCATTCCTTTTTGGTTCT
ACACCTGCATCGTTCACTGGAGAACTGGTTATACAAGAAAGATGCTTTGC
>cap3_Contig109
AATCGAAGTTGGCAACAAGGAACACAGGAACTGGTTATGATTATGCCTCGATCATGCATT
ATGGGATGTATGCTTTCACAAAAAATAGAAAGCCAACCATTGTTGCTTTAGGTAATTCTA
AACAGCAACTTGGTCAACGTTATGCTATGTCCCAAACTGACATCGATTCATTAAATCGCT
TGTACCATTGTGATAAAATTAAAAAGTATTGGCTCCGGACGAGTGGACGCAGTGGTCAGA
TTATGGTGGGTGTCATATCTTTCAACCACAAGTAGCACTTAATTGTGAGAAGAGAAGATA
CCGATTCTGTGGTAACTATGGAAACTGTGCGTGTGATAAGGATAGTAGCGGCAAACAAGT
GTGTAACGAACAAAGTGAGGCATGTCCAGCATCTTCCTGTAGACTGGATGGTCACTGGTC
TATCTGGGGCTCATGGAGTGCTTGCAGTGTTTCAGCAGAGTGTAAAAGGAACTAAACACG
TTCCCGAACATGTAC
>cap3_Contig110
TTTGGTCTCGTAGCGATTGTGTTTGCAGGTCGTTCTGTTCCTCCTTGATGAACTTCGGCC
CTTCCTCTTGAAGGGATTGATACTCGTCTGCATGTGCATCGATAACAGTCCTGACTTCGA
AGTGTTCATCAAGTTTCGACTCTGCTTCGGAGAGTGACTGTGGAAGATCTTCCGCACTGC
ACGTCTCACTGACCTGCTGTAACCAGTTCACGAAATCGTCGAGTGAAATGATGAAGCGTT
TCAACTCGCCCGTTTCAGCGAGTGACTCGTTCTTCTCTTTCACCATCTGAGTGAGGTTGT
TCCAACATGACTGAAGGTCATCAAACTTCGCCTGGATGGTACCTGCCTCTTCGGGGTACT
CCACAGAGAGGTCGACAGCTTGCGCATGGAGGTCTTGTAACTTAGTAGGAACAGCAGCGA
TATCCCTCTCGATAGTGTTCAACCTTCTCTGGAGTGTAATAACACTGGACAGATCTGCTC
CTGGATCTTCCACTGATGCTAATAAACCAGTTTTCTCCAAGATCCATGCCTGTGTTTCAG
TAATTTCACTGTACAAAGTTTGGATGACCAAACAAGCAGTTAGTTCTTTCTTCTTCTCCT
CGGCTTCTTTAG
>cap3_Contig111
TGCTGCTCCAGCTGCACCACAAGCCTCCAACTCAACTGCCACTGCTCATCAATGGAACCA
AAGCACAACATTAGCTCCAACTGCTGCTGCACCAGCAGCTGCTGCAGCTGCATACAACCC
ATATGCTGGATACCCCAACATGCAACCAGCCACAGCATGGCCAGCTGCAAGTATGCAACC
TCAAGCGTATCCATTCGGTGCTGGAGTACAACAGATGTATGGGGCCTACCAAACACCTCA
GATGCCTGGAGCTACAGGTTCAGTGCCCCCTGCTTCGGTCCCAGCAGTATCAGCTCCATC
ATTTGCCAGCCAACCCATGGCATATGGCGCTAAACCAGTTGGTAAAGTAGGCATGTAGAT
AATGCCCAGCAAAATTCAGGATGCTGTGGGAGATAACTGATACCATAACAACAAAAGAAC
ACCCAGCAGCCATATTATTATTGTTGA
>cap3_Contig112
AGAAAATTACCATTCGGGAACGACGTCATGTCAGCTACTGCTGACGTTACAACCAACCTC
GAAGAAATCACGACTGAAAAAACGAATCAACAACCCGTCAGTCTTTCACCGGCACCCGAT
TCGGGGATCGCGGAACCTGAAGTTATAATTCCGGAAATGGAGCAACTCATCACTGTTAGT
CCGGTTAAATCACAACCGAGAAAGGAATCGATGAAAGGCTCGACGTATAGCGGGGGAAGT
GAGACAGATCTTGAACCAAAATCGAGAAAGTCGAGTATTTCGAGAAAATCGAGTATTTCG
CGCAAATCAAGTGTCAGCCGTCTTGATCGTGGCTATTCGACAGATCGTCTAGATCACGGC
TATTCTGAAAAGTCGTTGAAATCTCTTTACACGACGGACTATTCGGAGAGTGATAACGAC
AGTGTACAATTCACGACGTATCTTTAAAATTATGTTTTAAACACCTCCATATTAGTTGTA
AGATTT
>cap3_Contig113
TTCATACTTTCTTCGTATAAAATTTGATCCTTGAATGTTGTACCTGATGGTGTTTTGGGT
TCCAGAGGCGCTTGGTCATGATAGTGTTTAAACCAAACATTGAATGCATCATGAGCAATC
ATGTAAGCTTTTATGGAAAAATATTCCCTAACTGCATCATCATCGACAGGAGGTAAAGCT
TTTTCACCAGCTCTTCTTCTCCATTGTGTATATACAACATCAACAGAATCAGCTGGTAAG
ATATCAAAAACAGCTTTAGCAGCAGAATGATTCTTTGCTGCAAGGAAGACACGACAAATA
GCATTTGCTTGTTTCATAGCCTCAGCACGTTGTGAATCATCAAAACAATAACCATTTGAT
GGCATTTATTTTAAGATCATCAAACTCACTACTATCAAGATCATTTTTCTCATAATCTTT
AGCACAAATATTTTCAACTTATTTTTTTTGTAACTTCTCTTTAGATTCTAAGCCAGCTTG
TTCGCCAAGTTTAAGATAAGC
>cap3_Contig114
AGGAAGACTAGGGTTGAACGAAAAATGTGTTTTCGAATATTTTCTGAATCAGTTGATGAA
AGCTTATTGTATGGTTCATGTCTGCCACGCTTGTCTGGCGAAGGAAGCATACCTTTTTTT
ACCATGAGCACCAGAATAAACCTTTTTTTAAAAAGGAGTCGTCTTGTCATTCCTAACGTT
ATTTCGATACATCAGAGAACAGTACGGTTGTTAATTCGTAACAAAATT
>cap3_Contig115
TTTTAGATGAGATTGAAAAATAATTCAAAGAATAATTTACAATCAAACAATATTTGTACA
AATAAAAAACTCAGAATAAGTTTAACCATAATTCAGAAAATTTTCAATAGATATAAAAAA
GTAATGAATAAACCATTAAAATACATAAAATGAATCTGGTTTATTTAACTGAATAATAGA
GAATTAGCACAACCATTTTCTCCACTCATAGACTCTGTAGGTACAGAGTTAACATCGTTA
TAAATGGATGCTCTAGAATTTATGGAATCACAAATACTAACATTATCCGAAGTTAAACGT
GAATCAACATCCAACAATTTTCTCAAAAGATCTGGGTCGATCAAACGACTTGTTTCATTT
CCCTCACTTAATCTGATTTCGGCGAGTCTTGCTTCAATATTGTCTAAACGAAGTGCAACA
GTCCTCTCATCGTGCTCATTTTGCAAAACTTGTTCTCCACATTTGCTATCTCCTACAACT
ATATTGCAATTTTCTGACATTACATCAAAATCACTGAAACTAGATGTCTTGTTTGATTCT
TTCGTGTTCCCATCAGAATCAAAGGAAAGAGTGAAGTCGTCAACAAGGACAAGTTCATTC
AACTGTTTATCAATCAATTCTAAATTTCGTGACTCTTCATTACGAAAATTGATACGGACT
AAGCGTGATGGAGGGTGTGGAGAAAGGATTTTCCACCATAAACAAATCTCCACTATCAGC
TAACAATTCATCGAGGCGTTTC
>cap3_Contig116
AAGACCAATCTCCTTTATTCCATTCTTGGCATTCATGGAAAGTAGACTGCATAGATCTGT
GATTTCGATTTAGAATCATACCAATCTGTTTCCAATCATTTCCATTTACAGCATAAAGGC
TCTTGAATTCCTGTAATTCATTAGCACTAAATCGTCCACTGTCTAAAAATGACTTACTAA
ATTTAGAAAATATTTTACTATTCACATCGGCCCCAGTTCTTGATATACCTTTACACATCT
TTAACACAAATTGAGTTTGCTTTCTAAGTTTCCTATCATCTTTAGTCCTAACGCTTATTA
AGCCTTTAAAATCTTTCACCATATTAGCATCTAGGAACTCCTCCAGATTTTTCTTAATTG
CTCTTCTTCTTCTGGTGTCCACTTCCCAACATTCCTTACATATCCTAGTTTAGCTAACCT
TATTATTTCGTCAGGTCTTTTCCCATCTCTTATACGATGTAATGGACTATAGCCTTCCCA
GCTTACCTTAACATCCTTCATTGCATTTTCGGACTCATCATCACTCAAAACAATCATACA
ACAACCACCAACACCTGAGTCTCTTCCATCAGAAGACAATTCTATTTGAAGACTCTTATT
TTCAGTAGTGTTCTTGTTATTGATAACAAATTCTCTTTTTCCCTTTTCCACAACAGATGA
AGCACCAGTATTGTATATTTTCTTTTTGGTGACTTCAAGGTTCCTTTTAT
>cap3_Contig117
GTTTTGATTCAATCCTAGCCTGGATGTTCTCATCAACGAGGTTCTTATAAAAACTGTACA
GAAAACTAAACTAACAGGGGTGGATTATCATTTTACTGAATTCTTTGCCTACAAGGTTTC
CCTTTTGAAAAATGAGTGTGGCAATAGTTTGTTGACTTTAATTTAAAAAGCGAGCGTAGC
ACACAAAACGAGCGAAGCGAGTGCCAAAGCACTGGGGGTCGCTGTAAGCGCCCCCCAACG
GGGTTTATTTTGTGATTTTCAACATGCATCAGATGCGATTTCAGTGCCTTTTTCCATCCT
ATTTTTAATCCTAATCAATTTTTTTTGTTCCATAATTTCTTGGCAAAATATGAAAGTAAG
ATGGTAAATAAGGTCCTGCGAATTTAATGGAGTTGGCAGCCTGTCACCCGGTGAAATT
>cap3_Contig118
CTGATCTGTCCTCCATATATAAGCAGAATTATCACCAGAACCACAGAGTAAATATCTGTC
GTCTGGTGAAATAGCTGCTTTGATGTAGAAAGATGATGCAAGATGTCCTTGATATGTTGC
AATTGGTCGACTTGATAGATTTGTCGTTTGAAACTCGTAAATGATGTTGTTCGTACAGAC
AGCAAACATTCGTGATCGAGTTGAATTCAACTTTAGAGAACTAAAACCATGTTTTCTTGG
TCCTTTCCCAGCAAAGTTGATCACATGATATGCTTGTGCTTCTACCTTGACCTTCGAGTT
GGAATAACTTTTTCTTATATCCCAATACTTGATCGCACCATCACAAGCCCCTGTTGAAAT
GATGTGACAGTCATCGAGAAAAACAGCAGCTGTGACACTTTGTTTTGTATCTTGACATGA
TGGCTTTTT
>cap3_Contig119
TTTTGTTTGACAAATAGTTCAGTTTTCGCTTGTCTCAACGCCTTGTCAACTCTCTTTCGT
TTTCCGTTCAAAGGAATGATCCGGTCAACAGCTCTGTTAAACGAGTACGCATCGTCATGT
TCGTTGAGTTTGATGGCTAACTCGGTGTCTTCGCTGTACGAGATGACACCACCACGTACT
TGGTTCAGACTGATGTCGAAGTTGGAAGCCAACGTTTTGATGAAGGTTTTTTCTTTATCG
AAATTTTCACGCACTTCCTCTGAAGAATCGAGTAAGAATCCAACATCAGATTTGCCGTTG
ATTTTGGTTCGATCTACTTGAAAGCATGGTTTCAAATCACAATCAGCGTATCGTCTTTCT
AGTTTGGCGTACTGGACGATTCGGTCACTCAACAAGCAGTCTTTACCGCCATTCGAACCG
GGTGGGCGGTCACACTGTCGGTATTGATGACGCCTGCTCTTTCCACACGTTGCGTCACAA
TTCCCGAACGACGACCACGCGCCCCAGTTCGCCGTGCACTGGACATGGAGCTGAAGAACA
TTTCTCATCCTCGAGTTCTTCCTTCCATACGCATCGCTCACTTCACCA
>cap3_Contig120
TTGAGAATGAAAAGTCCTATATACATGGGGCAAATATCGAGATATAGAATTTGAAGAGAA
TGTATGCTTTGCTTACGAGCAAATAGTTTACTGGAAGAAAAATTTGTTTATGCTTCCTAC
TGGAAAAGCAGGTCGACTCTTCATCGACGAAATTACAAGACTTATTAATGCTTGGGTTGA
AGAATCGCCATTAAAAGGAATTTCTATGAAGGCCATAATGATAATGCCGAGTCTTTTGCT
CCAAAAACCATCAAAGACAAGTAAGTCAAAAGATCATCTTAAAGCATTGGAACGAAGAAT
GGAAAGTTGGCAAGCAGGTGATTTGTTAGATCTTTTACAGGAGAGCATAACTATTCAAGG
GAGCTTAAAATCATCCTCACACAACATGACCTTCTCGAAGATTTCAGAAAAGTTTGCTAT
TGAAATGCAGAAAGGTAACATCAACGGTGCGTTGAAGCTGCTAACAAACAATATGCATAA
TGGTATTCTTACCACTAAATGATAAGACAATCGCTGCACTACGAATGAAA
>cap3_Contig121
ATGGATTGTCCCAAAGTCTCATTATTCAATGTAATATTTTCATGGACAATTGCATTTTCA
ATCAAAAACAAATTATTAATTAAACGCTCATGGTTTGGATCAATATCAAGTAATTCTTTA
GTAAATTTATAGGCAGCTAACAAATTATCAATCTGATATTCAGCCCAAGACAAAACATCC
AAAGCTTGAAAGCGTGCTCTAGTAATATTGAATTCAACTTCAATTTTGTTGTGATTTAAA
ATATGCAACACTTCTTTCATCCAACTAGCTGTTTGATAGGCTCTTTTCTGTTGAAATGCT
GTATAACCAATGTGATATATATCTACAACATCTAATTCTGAGCCATGATAATCAATGCCA
TCAACAATCATTTTCGTTGGTAAAGCAAATGTTTCTTGCAGTCTTAGCAAGGCACTTTTG
GCACCATACACATCATCATATGTTGGAAAATACTTTTTTTCCTCTGATAGCAAAGTAAGA
AACCATTT
>cap3_Contig122
TTTCTCAGTACCAGGCTCAGTCTTTAGGAGGCTATAAAATTTTGAATTGCTGCTTGTTTT
GATATAGCTTAGAGCGTCTTGGTTAAATTGGTCTCTGAGTCTTTGATAAAGTAAAATATT
AGGCAATTGTGATATGCTGGTTTCCATACCTGCTGTCATGAACGTTTCTATCATGCCATT
GGTCTCAAGTACTTTCTTTATACAGGAGACCCATGGAAGGTTTATCGTTGTTACCTCGCC
ATTGGCAGCTATGAGAAGATCGTTACAGCTCCCAGTTCTTCACAGATGCTTTTATTGCAT
TGAAAAGGNTTGGGACAGATCCAAGCTCAAGGTGGACTGCATGTGTATTGGTCTGAACTC
ACAACAGTTGTTTATGAAAAGTGAGATTAGTTCGCTCGATTGGGC
>cap3_Contig123
CGAACCAACAGCTTTTATACTTCTCTGTCCGTCAGCTGCATTTTGAACGATTTTTATCAA
GTCTTCGAGATTCTTCGGTTCTACTCGAGTGAAACCAGCTGGCATACGATTGAAGAGATC
TGAATTGTTAAATGGTTGTTTAGGTACCAGATCTGGCTGTGATTCATCTTTAATAATTTC
CGAGTTATCTGTTTTTGCGATTTTTAAAAATGTGTGAAAACTTTTCAGTGTTTCCCTTGG
ATGGGTTGCGAGAAACTGGATTTCCTGCATCACATCTTCAGCCCCATCTTCTTTTTTACG
ATAATTCTTTATAACCTTCTCAACAGCTTTATCAACGGATTCCAATATGTCAATGCGAAT
TGCGAAAAGGTCTAGTTTATGTTGAGAAGTTGATGTTGTGAACTGTGAAAATGGTTTTCT
TTTTATTCTCATTGGTAGATTGGTA
>cap3_Contig124
AGAAAATCGATTTTCGTATCAATTTCCCTGTATCTGCTTACCTTCAAGCTATTCCTATAT
CCAGCCAAGACTTTACTCAACTTCTGGCTTCTGGTAACTTAAAAGAGAAGCAAAATGTTA
AGATAAATTTAGAGAAGAATATTGCACTAGGTGAACTCGTTCAAGCGATTTGTTTGAAAA
TGAAGTTAGTCGTTGTCGAACACGTAGACGGTTGTGCATCTTTTTATGGGTTTACTTTTC
GGAAGCAATCAGTTTGTTTACTTGTTAAATTTGTGGAATTGACGATGAGTATAGATGGGA
AATCAGATAATTTTCAACTTTTAACATCTGTGCTTAGAGAGGTGGAAGAGTTGGTGAAAA
ATGTCTGAATGAATATCAAGGAAAATTATGGCCTGACAATGACATTGGAATTGAACGGAA
>cap3_Contig125
GTGTCAATGAGTTGTATTTCGTGTTTCGTGAACCGAATGATACCGACGAGATTCGGAGGG
AGTACACACCAGATCCTGTTGTCATCAGTCACAAGATTCAGGAATTCACCAAGCGATGGA
AAGACGTTATCGATGATCGCATGCAGAACGTCCTCCCCGAGAAAGCGATCGAACTGATAG
CTGAGTTAGAACATCACATCAAGGCAGGGTGTTTAAGCTCAATCCCACCCGAGGTCGGGG
ATGAGAACTTCACAGACATTCACAACTGTTTGCGCAAGTCTGTCTCACATTGTCGCATCA
CTGTGCCACTCGTCTCTGCTCTCTTCTCCATGTGTCTCCATGACATCAATCGCAGTAAAG
GTGCGCCTGTCGACTTTCGTTACAAACCAGCCACTGCTCCTCTTGAAGAGGTGAAGAGTG
AACTGATTTTACCACAAACAGACGAAGGTCTTCAGACGGTTTCTATTCAAACAGACGACG
GCGAAGAATTCCAAAGTGCAAATAGTTCAGCCGATCTCACCTGAGAAACAAATCCTACTA
CCAGCGTCCACCCTCATCTCGCTTGTCGAAGAGCACTACGCCAAGCACGGTCTCCAAGTA
CCGACCATCCTNTCCAGTCGCTGATGTATTACAAGTATCAAG
>cap3_Contig126
GGTTCTGAATTTTATGAATATATTTTTCCTTCTTTAATTTATTTTTCATATTTATTTTTC
AGAATGATAGTTGACTATACTTCTTCTGTTTTTACTGTATACAAATTACTAACTCACTCA
CTAACACTGACCCCTTCTAAAGTCCTTCTTTCGTGTTTTGTATTTTCTTTGAAGGTGGTT
TTTGAGCTTATGATGCAAAAAAACATTGATCTTTAGAAAATATTTTCCAACGAATTCTTG
GGTTTTCAGGAGGGAGAGGGGCGTCTCTCATGACTGAGCAGTGAAGACATTGGTTTTTAC
GTCCTATCGTCTAGAAGTTGAATCATGGTCCGTTTAACAATCCGGACAAAAACATCTATG
ACCCGGTTTGGAGGGTTTGAATCAAAATCTGATCGAAACATTTTTTTGATCCGGACGAAA
AATCCTTTGATCCGGATCAAAAAATGGTCTTGCGTATGTATTTTTGGCACGTTTGTATTA
TC
>cap3_Contig127
CGAAGATTGATTGCCAGAACATTAAACATCTCAGCATAAACATGCTTTCTGCATAGACAA
GTATTTTAAACTTGTGCAGATCTAGCAAGTAATCACATTTTATTATACAGGTACTTATAC
CTTAAAATGTAGGTGATTGAATTTTTGCCTCTGGAGCCTTCGGATTAAATGGAAAAAGCG
TTGAATCAAACCAAAGTCTTTAAACTATATAATTTTAAGAAAATATTCAATTTATAGCAG
TTATTGACCCCAACTAATGAATTTTTCCAAAAAACTTAAAGGCAAATTTTCCATAAAACT
TGAAACTGATCCTAAGAACCATATATGGTAACACTCTTTGACAGTAAGGCTTCATTTTTA
AGCCAAAAAAACATGTTTCAAATCATATTGTTGTTCGCGTTATGAGCATAAACATTGTTT
CTAATAAGCCTAGACATCGAACAGGTCATTTTACGGAAAGTACCTTCCAAGTATTCCATT
AGATCTGAAACGTTCTGGACACATTGGTATCAGATGGGCAATCATATTAAATTATCGAGA
AAATGTGTCGATTATTTG
>cap3_Contig128
TTTAGCTTAATCAGGCGATAATGTATCCTCCGTGAATTCGTCCACAAATACTAACTGTGT
TTCATCGCTAATCATGCTGCATGTAAATTGTTTCTCCTTTGTCATAGGTGCAACATGTTC
GTCCTGCATGAAGGACAATATGGGGTTAATTATTGTCGTTTTGCCACAATCTTTCGGTCT
TGGACCAGCAGTTTCCGTGTTTTCAATGTATTTTCCGCCAAAGTAGTAATTGGTACCACT
TGCAAAGGAAGTGTATCTTCTCAGCAATGTCAGGAAATGAATTTTCTATTGTATTTTCAA
AATGCCAGGGACTTGGACTTTCTCCTGGTTCATACTATACAAAAGCACGCGGCGTTTCAA
TGCCCAACATTTCGTTGTCAACGGGCACGAACTTCATGGATGGAATGTGCCAGCACACAC
CTCCAGAAATATTGTGTACCATTGTCCGTCCATTAATGCATCCGAAATGTAGAATACCTT
ATTGTGACGTATATGCTTTA
>cap3_Contig129
GGGTGATTGGTCAGGGGTGATTGTCTTTTTTTGAATATTATTTTTCTAGTTTAAACTTCA
GACACATGCACACATGCATTAACCCTGCAATGTTTTCTTTGACATCAAATAACACTTAAC
AGAGATTTTTATTATACAAGTGCTGTTAAACAGCATGCTACAATCTTGCACAGCCTTAAT
ACAACCTTCAAGAACACAAAACTCTTTCATATTGTATTAATTAGTCAATTAATATACAAA
GAGAACATTTATGCTATATTATGATAGACTTAAAAGTGTGTTGTCGTTATTAGAACAAGT
GAAACTTAAAAAGTGTAATAACGTTCAATAAGAATGGGATATGGTTCAATACAATACAAT
AGAGATTTGGACAAATTATAAACACAAGTGGGACACACAAATATATCATGTTATACCGAA
AAACTGACTT
>cap3_Contig130
GTCAAACACAATATCTGGATCATCTGATGATAAAGCAAACTTAACCCTGTCATCTATTAG
TTTTGTAGCTTTGTTTGTGGATGCTGATGCATCATCAGTTAAAAAATGGTACATGGCTCT
GACTACAGCAGGCTTAACATTGACGATAGATTCGAAATGTTCCTTGAACTCTGATTTCAT
AGCCATGGCGTCATTACGTAAAGCTTCCGGTAATTTCCAGAGAAAATGATACGTACATAT
TCCACCTTGGGGAGAATATTTGAAATACACAACAGGAACAGATATCCCAAACTCCCTTAA
CCTCTTGAAATAATGGAATTTCTATATTTAGTACTCAACGATGCAATATTTGG
>cap3_Contig131
GTTTCCACGATCTGACCCGTACTTCGATGCTGCAAATCTGACCTTTAAGTTTAATGTGGT
TCTCGACATATGGGAAGAAGATGGGAAGGGACAATATCAAACAGTCGCCCGTGATCGTCA
TCATTTCAAATTGAGACGACAAACTCAAAGGAAAGTTGTTTGGTCATTGAGCAGACAAGT
AATAAAAGACTAAACATTGAAAAATGTTTCGGTTTCTACTGGCTCAAGGCAAAGATGTTC
CTGATCCAATGATTTCTATTGTCATNAACAAGATTACAGAAATTACGAATGGACCAGAAG
GGCAGAAGTGTTGATATCTGGCCATTG
>cap3_Contig132
TTTTACTCTTCATAAAGAGTGTGCGAAACACCGTTTTAAGAGAGAGGGGGAGAGAGGGGA
GAGAGATATCCCTTCTCCCCTCGAAGCTGGACATTTTTTACGTTTTTTCTCGATAGAAAC
ATGTTTTACTCTTCAGAAAAAGTGTGCAAAAAATCCGATTTTTTAAGAGTGTTTTTTTTC
TCTCCTCAAAACTAGACGTTTTCTATTTTTTTCTAAATCTTTTATTCTATGAAAAATCAT
CACACATCAACACGTGTGCGAAATATTGCTCCGTCTATTTTCTGGAAGTTAATAAGAAGT
GAAGATTTACTAATCTGATTATGTAAAAATAAGTTCTTTGTAAAATGTGAATTATTTTCT
GTTGTTTTTTTTAGATATTTTTCAACTCTCTATTTTTTATTTTGAACTCAGATACGCAGA
AATATATTCATATCAAGAGAAAATCATATAAAACGTACGTCTTTGAGTAAG
>cap3_Contig133
AATACTTCGACAAAGAAGAGGAAAATAAACGGTTGAAATACCCTTTATAGCTGACGTCAG
TCCAAACTTTCATTCATTGTCTGATGACGGCGGGGCGGTATCGACAACCCGTCGAAAATT
TACATTTAAATATATTAGTACTGAGGTTATCCATACATGAAGTTTATATTTCTCAAGAAA
CCAAGTCTCACTACAGAAATAGCATGACCTAAAATCCAATTTCCGAAAAGCATGAGAATC
TTAATTAACTTAAATTTGATTGGTCGTTAAAAACGTAAAACAAATAATAGAATCATTATC
AAACAAAACTAACAATCAAATTGAAGTTAACTAGAATGCTTATATCAACTGTGGACAATT
TTCCAGTTGTGGGGACACTGAATGAGTACTGGTACTTACTTTTTGTTGAAACCATTTCAT
GGAATCG
>cap3_Contig134
TTGAATACTATAAGGAGTGGGTACAAGATGTGGAAGATCATGTGCCAAAAGAACGATTAC
TCAAATTCAATGTCAGAGAGGGGTGGGGGCCGCTTTGCAAGTTTCTGAGTGTTCCTGAGC
CAGAGATTCCTTTTCCGAATGTCAATTCTACAGCGCAGTTTCAAGGGAGAATTGGGGACC
GCAAACGCAAATCGTGGTTGATCTTGTATGAATTACTTACGCTTCCTGTGTTAGGTTATT
TCTGTTATAAGCAGTGGCTTAACTAGTTTCTCAGCACCTTTGAAAACAACAGGGGAAAAT
TGCTTTGACCTATAAATGAAGATTAAAGAAACTTCGGGATGTTTAGTGGAGTAAGATTGA
CTGGTTTTAGATCTTTCATAAGAAAAGTAGCAGTATCCTCAAAGATACCACTTTTTTAGC
TTTAAGACAATCCAATTTTTCTTGTTTTTTAATAATCGTAAGTTATTTTCTCTTTTGTTG
GAACCTAAACCAAGCGCTATTCAATATTCTTTTGT
>cap3_Contig135
AGATGAAACGACAAAGCCTTTAGAAAGCCAGATGAGATTGAGCGTGTACCCTTGTCAAAA
GTAAACTTTACCTTGGAAGGAGAACTTCTCAGAAGTCACGTTCATGTAATTTATTACTGA
CCAAGGTTATCTATTTATTATTATTGAATTGAATTGAATTGTAGTTAATGTAATTTTTCG
TCGTATTTTATAAAAAACAACATTATTTGAAAGTATTTCTATTTGTAGTTGACCTACTCT
ATTGACCTAATTAACTTTCGGTTTGTCAAAAACATGTTGGCAAATAAACATCTTCCTTGT
CATTGTATTTAAGAGTTGAATTTGATATCTGGGTAATACTTACTGATCGATAAGTTCCCT
TATAAATTATTGTTAAAGCATCTGCTGTGATTATCATAATGATAGTACCTTGGTTCAAAC
TATAGTACTTTTCG
>cap3_Contig136
CTCAACAGCAATTGAAGTTGACTACTTAAGTGATATGCAAAATCCTGAACCTTATCTATT
TTCATTCAGAGAAAGACGTGGTATGTTTGCTCCAGTTCCGCATAACATTGTGGATTTTCA
CCAACCAATAACTTCAAATTTTTTTACTGAAAAACCACAGATGATTTGGGTTGGACTTCA
AAATGGTAATGCTACAGATCAGACCTTTAATCACGCTTTGTATGAGAATGAAAATGGCGA
AACAGCTTATATTCAAATGAATAATGCGCAATTTCCTCGAACTTTATTCAAGGCTGATTG
GTCTGAGAATGCTAATGGTTTCTTTTACGAAATGGCACAGCATGTTAGGGCAAACTATTT
TTCATGTTAGGGTAACATGCTATCACCAGTTAACTTCAAAGATTTGTTTACCATTTTTTG
TTTTGACGGTTTCAAAACTAGGATTTTGACACTTGGTAGTTAAAGTATATCATGCGATCT
TCATATACAC
>cap3_Contig137
AATATTATGATCTCGATTAATAGCGGATGAGGTATGGGAACAAATGACGCCGACACCTGC
TAAGCCAACCAGCGCGCCCCAATCTTGATACGAAATCAATTGTGCGTTATCAAATGTCAG
TTTTAGTTCATCGTGTAGCACATCCCTTGTGTATTTCTCGAAATCACCCAGCGTCTCACC
AGCACCTTTTGAAATCGTTGCCATATTGTATAGGTTCCAAACAACTACATTCATAACGGC
AATCCGCGTGTTCATCGTCTTATAAACGTAATCGACGGCGTTGAAAATCTCAAGTCCTCT
GTGCTGTGTTTTATTTATATTGCCGCCATGTTCTTTGTATTCAAAGTTGTCAAAGGACAA
CGACGACTTCGACATATTTCATGTTTATACTCGAACGACGCAAACGACGATGTTCGTTTT
CGCTATGGACAAGAAGATACGAGTTTTCCTTCGTCGGCAAATAGTGCATTTTACGTACTT
TACTTTTCATTGACTGATGCGTTTTACGAGAACTGTCTGTTGTCTTATAATGATAGTCAT
GAGAATTTTCCGTGAATTTTTTATCTTTGACACCGCATAAGGTTCTCGTTCGGCCACTTA
TAATATCTTTGTTTTGTATAGAATATATCGGTGCGTATTCCAATCCTTTGTTACGTTTTT
AATGTCATGAGGATGGGGTTCTATCACAAATTCGTCCGAATCTTCGTCAGTCAATGATCC
CTTAAGCCCGTGACATACGCTAAACGTACCGTAAGAACGTCGTCTGTTCAATAGATATCC
ATGATAATAACAATTCTGATCGGCAACCGTATTAGTATCCTTGGTAACATACGCACCAT
>cap3_Contig138
TTTTTGCCACCCTGGTTATTGCTATCATATCTTGTCTTATTTATATCACTTTTAAGGTAG
TGGGTAGTCACATCAAATCATAAATTGATTACTAAGCAGTTAATATGAAACCTTACGAAG
TTCCATGAGATGTGCGCTGAAATTTTTTCACGCTTAAACTAAGTATGTTATGACGTTATT
TCTAAATTCTTTCTTGAAATATGCTTGATGTTCTATTAAGTGCATAGACAGGTAAATGTA
AAATGATACAAGGTAATGTTTTGTTACTATTATTAATTTAAACCCTGATCTAAAGTTTAC
AATATAGAAGTATGAGGTACAGTATTAGCATCCCCATTTCAATATAGTTGAGTCTTATAT
CATAATCAGGTCAACTCTAACTTTTTTTTTTTGTTTTTGTTTTGTTTTGTTTGTTTTGGT
TGGTTTTTGTTGTTTTTAGTTAGTTTCGTTTTTATTTTAGTTCTTGTTCCTTGTTCTAGT
TATAATACATAATCTATTTAGTTTTCTTATTTGGTCACTTCTTGTTCTTTTCTACTTCTA
CGTAGGTTGTGTAGTC
>cap3_Contig139
TTTGTTTGTACAAAGTCATCCATTTTCCGTTGGAAACATGAAGTACCATTGGTGACTCCA
AATGGCATTCTTGTGTATTGCCAGAGCTTCCCATCTGCTTCAAAGGCTGTAAACTGCCTA
TCGTTTTCTGACAAGGGGATTTGATGGTAGGCAGCTCTCAGGTCCACGGTACTAAAGAAT
TTATACTTTGCTATGCTGTTCACCATGGTATCAATTTTTGGCAATGGGTATGGATCTAAC
TGAGTGTATTTATTGATTGTTTCAGAATAATCAACTACCATTCTCCTCTTAGATCTTTCA
TTTACTACAAGTACTTGGGCTCGCCATGGGGAGTTACTAGGCTCAATGATATTTGCTTCA
GCCAATCGGAGTATTTCTGACTTAATAAAATCTAAATCGTTCTTGGAATATTTCCTTGAT
TTTGATGCAATTGGTTTACAGTCATTAGATAAATGAACAAACAGTTCAGGTGGAGATGTT
TTCATTGTGGTAAGTGCTACAAAACTCAGTGGTGGTTTACTGCCTCCATACTTTATGGTT
>cap3_Contig140
CACAGCTTTAGAGATGATATTGGTTGTTCAGGCACATGGCAATGGTGGGGTGAGAGAGGA
CATAATTTTCGTCGGCAAATTTCGTGAAATTTCGTGGTTTGTCAGCAAATTTGAAGTTTA
GGTCAGTTTAAGCAGCTTCCAGTCGCTTTAGATAAAGCTATCGGCAACAAGTGCCAATTT
ACATGTTTCGTTGTAAATCATAAGATAAAACTGTTTGTCATACTAAGCAGAAAATAACAA
TACAATGGTTATTTTTCTACCATTAGTTAGATATTTCCGACATGTTTTTGATCATCAGAC
TTTGTGTACAATACAATCAAAATCCATCCGCTTCTTTCGAGTTTCAGCAGACAATAAAAA
TCTATTCTTTGTCAATAATATTTTTTCAGTTTTAAAAGTAACAATTCGGTTTTCAAAGTA
ACAAATCTACTGAAATTGCAATCTCTTCCTTCATAAATATCATAACTTGTGTCTCAGCAC
AGAAGAAATCATCATACTATATTTTCTTGATTTTGTTAAGGCATTTGACACTGTTAAACC
>cap3_Contig141
TTGATGTCTCTTTAAACTGCCTTTTACGTAAAAATTGCCAGCTAAGTTACTTGATTGGTC
AGTCTCAGAATTTTTCTTAAGCATACCAACAAATGATGCAACGCGTTTTTTTCGCTCATC
CTGTTTAACATTGGTATCACTATCCTTTTTAAATGTTCATTTTCTTGTACTTTTTTCTTC
AAAATGGCTTGTTGCTCTGCAGTTAAATGCTGTAACATTGGTTTTACACTAGCTTGGCGG
TTAACTTCAGCAATTTTTTGTTGAAGTAAAGCTTGTTCTTGAAGTTGTTTTAAAAGTTTC
TCTTTTTCCTCAATTTGTTTTTGAAGTTTACGTTTTACCTCAATTTCTGGATCTTTGTTC
GGTTGGAATCCTTCAGCAGCAGCTTCTGCTGTTTCCTCTTCATCATCGTTTTGATTGAAC
ACTGATGCAGCTGCAATAGCAGATTTTTTCGGCCCAACAGATACTGGTTTCGATTTTAAC
CTAAGTCCAAATTTCACTTTTGAATTTTTCTTACCCTCCTCAT
>cap3_Contig142
GCTTCTTAGAGAAACTAGGCACGAACATTTTCAAGAACCTCCAGCTCACCATTCGCAACA
TACATATTCGTTACGAAGACGCGATCAGTGATCCGACATCTCATTTCTCGATTGGCCTCA
CACTCGAAAACCTTTCCGCCGAAACGTGCGATGAGAACTTCAAACCTCAGATCATCAAGG
AGAGTGTGACTATTATACATAAACTGGTCCGGTTGGATAACCTTGCAGTGTACTGGAACC
CGAACGACACATTCTCAGAGTTAAAGACTGAACACGTGGTTGGAGTTACTCGAAACAACG
CAAATCGCGCGACTACAGTTCTCATCCGTCTGAAGCGAACATTGCC
>cap3_Contig143
TGATACCATTTTGATGATTGCATCGACCTATGCTTCTCCAAAACCAACTGTTAGTACTAC
ATACACTAAAAAGCTCTATCCAACCAATTTCGATTATTGTTTCTGCTTCAGATACTGCTT
CTAAATCCTCCACATTTAAGTCTTCTAGACCCCAACTTTTATTCAACCTTTTGCTAATTA
TTTGACGACAGACAACACTCATCCATTGTTGTCAAGAAACAATAATTCATCCATAAAAGA
ACGTTTAGACGCTGTTTTGAATGGACAGTTTGTAGAGGAAGAACTTAGTAGTGCTAAAAC
AGACACACATAATGTTTTACAAAATCAAATTTCAACTTTTGATGTTAAAACTTCGACAGA
TCGTGATTTACTTATTCAGATATTTCAGAATTCTCTTGAGAATAAAAAGCAAATACAAGA
ATTACATGACAAAGTAAATAAAGTGTACGATACATTATATCAGATGAAATTAAAATCACC
ACGGACAGCAACAAAAACAAA
>cap3_Contig144
GTCAATATTTTTCTGAGTTTGTCGGACTGCCCTTCGTTACGTCACTGCTTGGGGGTATGG
TTCTAAAAACTGCTGTTGTATCTTCTGACTTTTCATTATTTGAGAGAGAGAAAAATAACA
TTGCAATTCAATAAAAGTAGTCATTTTATTTGTCTTTTGCCGGTATAAAGATGTCAAATG
TCCTCGTGATTCAAAATGCATTTTTTCGTCTAATAAAGTTTGCTCATATCCAAGAACATA
CAAAACGAAACGCCTAAAACCTTTTTCACACAAACATAAAAGTTGCTTTCCTACTGTGTG
AATACTTCACTTGGTGTGAAGCCAAACACATGAATAAAGTATGTTTTAAATGCTAACTGT
GTACATTGGTAAATGTGTCATTATGAATGCGTATTCATGCGTGGAAACCAAGTGGGTGGT
GACCAGATTCAACCGTGGTACTATGCAAGATATGAATGGTGGT
>cap3_Contig145
ATTAGACAGTTCGATATGATATATTTGAAATTACTGTTTTTGTGTTTCCTTAGCGGACTT
GACAATGTTCAAGAAAAAACACAAATTCTGTTCTTGGACGTTCCCTTAACTAAATTACAA
AAATATATATATCCATTCAAAACGATCAAAAAACCTTGGAGAAATACCTACCAATCCTAG
TAGAAAATAATGAAATATAAAATGAATTATTACAAGGTAAAGAAAGTCAGAAAATATCAA
ATCATTTGGCACCTCTTTTGCATACTGTATGATTTACAAACTGAGAGCGCCTTATTGTTT
TTCGTATTTCTTTTTGAAAATTTCAGATTCGTTTTATACTAAAGATATTCCGAGAGAATC
AATTCGTGCATCCTAATTAGACCGGTCGTATTTTGAGGTTTGTACCGGAGAAGGCCATTA
ATG
>cap3_Contig146
GAAATGTGCGTATGGATTTGAACTATTAATCTTCTTTCCACAGAGCCAGCAGAAATAACA
TCTGCATTTCGAACAAGTCATTTTATTACAACCGTCAATCTTCTCGATGGACGTATTACA
TTGCGGGCAGTTCATTGCGTTCTCTTTGATCCACGCTTCAGTGTAATACTCATTACATAT
ATACTGTAATCGAGCAACGCCGTACTTCTTCTCCAATTTAGCCTTCACCTCTGGGCTACC
ATTTATATACTCGTCCCGTAGATTTAGTAAGTCCTTATTCTTGATTTCACAATTGGTTAT
ACCATGATAGGTTCTCTTACAAAACACACAGAACACAAAACTACACACAGGGCATCGACC
CATATTCTTCGAATCGGGTTCCATGATGACAACAGATTGACAAGTCTTGCGTGGACAATA
CGTCATGTCTTCCATACAATCGAGTGTCGTCTGAAGGAGAACTTTCTCGTATCGTTCATA
TTCTTTCTCTGGTACTAGTTTC
>cap3_Contig147
TTTTCTTTACTTGTGAAGTACAATACAATGAAAATACTTCTTTTTTACAAAAACGCACAG
TCTTTTACCACAATGCTGCGAGCTCTCACGAGTATTTGCAATAATATTTATAAACAATAT
TGACCACTGGTACTGTTTTAATTACTGCTTTTCGTACAATCTACCTCTTTTATCGAAACC
AAAAAAGTTATTCAATTTAGCTTTTTTTTAATACTTATGTCAAGATGTATGACTAATTTT
CTGATTTAGTCCAAATGTGTTCTTTTAAGTGTCCTGCACCAACTAAAGTTCAAAAACGTA
GCACCCAAAATCAAAACCAAATTAACTAAGCAAATTAAATGTTGACTTTCACTGTCCTAA
TGAAAAAAGAATATATTTTTTTGATCCACAAATAAAAACGAAATTCCAGTTTATTTCAGT
AAGAATTAATTAACTCTGTGTCTTCAAAATGTCACGAGATTTTCCACCCTAAATACATTC
ATCCGTTCGTAGATACTTTTCTGGATGCTCTAAAATCACCCCTTTGACACGAGTAATAAA
TGATTGACTGTGTAGTTGTATACTCAAACATATATCAACAAAAAAA
>cap3_Contig148
TTTGTTTGTGCGTTCATTAACATAAGTGCGATCATGGTTTTTGATAGTTACGGTAACGAA
GAATCTTATGAGGAAATTGAATCACCAGGCGCCGGCGAGTTCCAAGGATTTTCTCCAGAA
CAGATAAAATTATTCCGAGAAGCTTTCGCCATTTTTGATACGAACCGAACTGGATGTATT
ACTTCTTCTGATCTCACCGCAGTCATGAGAAATCTTGGACAGAATCCATCCGAGAAAGAC
ATTCAAGATATGGTCAGTGAAATCGACGCAGATGGAAATGACACAATTGAATTCGACGAA
TTTCTCAACATGATGGAACAGAAGATGCGATCAGTCATTCCTGACGACACCCTATATGAA
GCTTTCAACGTTTTCGATAAGGATGGTAATGGCTTCATCTCATTGGAGGAATTACGTCAC
GTGATGAACTGTCTCGGAGTCGTGTTGACAAAAAGTGAAGTCCAACAGATGATGGATGAA
GCAGACATGGATAAGGACGGGATGTTGAATTTCAGAGAATTTGCTGCCATGATTCACTGA
CCATATCTTGAATGTCTTTCTCGGATGGATTCTGTCCAAGATTCTCATGACTGCGGTGAG
ATCAGAAGAAGTAAT
>cap3_Contig149
TTTAAATGGAGGATGTATTTCTTTGTTAATTAATTTATCAAAATCTATTGTTTTGAAAAA
TGCTTGTAGTTTCATTTCTTGAATACCAGTCTTGAAACCTAAGCGATTTTGAGGATTCCG
TTTAAAAAGTGAACGTAATAAGCAATTGTGCATCTTGACTTAGAAATGGAGGCATACCTA
ATTTTGCCTTTAATATCATTGTCATCGTTTCTTTTCTATTTTGCCCTTGAAATGGTAAAT
TTCCTGTTAGCATTTCAAACATCAAAACACCATAAGACCACCAATCAGATGCAGTTCCAT
GACCCCGGCGATTAACGACTTCCGGTGCCATGTATTCCACAGTTCCACAAAAAGAAAATG
TTTTCTTTTCTGTGTCAAAAATGCTTTCCTACTTAAGCCAAAATCGGTTAATTTGATATG
ACCATCTACATCTAGCAACACATTTTCAGGTTTAAGGTCCCTGTAAATAATTCCAAGATT
GTGTAAATGGTCTAATGCCATAGCTAATTCTGCTAAATAGATCTTGACATCCTCCTCAGT
AAACATTACTTC
>cap3_Contig150
GCGATCCTTATTGGTATACAGATACAAACTAGGAAGGAAAATAAAACCAAACAGTTTCAC
AGAATAAATATTCATAACAGATCAGTAGGGAAGACTCTGTAAGACCATAAAAACCATAAA
AAGCGTAAAAAGATATCAAGAAATAAGTTACCTTAAAATATTTATAATGTAAGCAATCTG
GGCAAATAAATAGTTTCACATTTAAGTGAACTTTGACCGACCACTAATCTAGTCCATATT
CTTCTGGAGAAACAATGTATATGAACCATGGAGACGATTCTTTAGGAAATTATCGGGTTT
TTAGACATTTTTGAGCCAAGTAATTCCACTTCCCGAGGATCATCGAACGTTCCTCCACTC
AATATAACCTTAGCACCAACAATTAAAACCGCCAATCAGTTCAAAGCACTTGAAAGCATG
GGCCCGGAAATCGACTTTAATTCATCACCCACCATCCCAAAAACCCTTATCGAATTCATC
CAAATTAACAATGACAACAAGAACTCTGGCCTACCTAACATCAACAATCCCCCAAAACTA
ACATCCAGCTGGGGACGTCAAGATGTTACAGAAGAAAAACTCAAAGGATGGATCACGGCC
GACAACGGAAAAAAGAAAGAAAACAAAACAAGACCCAAGTCAACAACCAAAACGAACCAA
CCAAAAAAACTGCTATTAACAACAACAACAACAACAACCAAACTGACCGACAAGCAGCAC
CAACCAACAATCACCAGCCAGCACCAACCCAACCAACAACAGATAATAGTGGCGCAGAGC
AGAGCTCAACCCAAACAATCACCATCAAAAATTATCACCATATCTAACATCCAATCCAAT
CTACCCATG
>cap3_Contig151
ACGATTGCGACCATTTTTACTCGATTTTATTTCAATAGCTTCTTTTATCATATCCAGAGT
TTTCTTCTGTGAGAGAAATATCTTCGATTTGGCTGTCTCAATTTCAAGTTCGATTTCCGA
ATGGCGTTGCGCGAGCTTCTGTACCTCGTTGTTGACGACCGTCAGGTGATCGGTGTTGAT
CGGCTGTTTATCTTCTTTTAAAAAGGTTACCTTGCCTAAGAAGTTAGTCAACTCTTCAAC
CATGTTCGTCACGTTGTCAATCCCGATATTGACATTCTGACGATCATCTTCATTCTTTGT
CGACCCTTCAACGGATACAACCATCGGTCCACAGTTATGGCGCATGTATCTTCTAATATT
CTTCGCAGTGGCAAACGACAGCTCATACTCCACATTGATCATGATAGATGCAACGAGAAG
ATTTG
>cap3_Contig152
GTTTCCTACCTGTTAGATATTTATTCGTTGTTTAGGTCAAGTGTTTGCATCGAATATCAT
TCTCAGTAATTCTGTAGCTGGTCTCATGATTGGTTTGTTGGGAACGGTCTTATTGCAGAG
TTCGTCCACCACAACTTCTATTATTGTTGCCATGGTAGCGTCAGGAATCCTGCAAGTACG
TCCTGCCATCCCAATCATTATGGGCGCAAATATCGGAACAAGTGTCACCAACACAATCGT
CGCTGTCGGTCAAATCGGCGATAAAACCCAATTCCGACGTGCGTTTGCCGGTGCTACTGT
TCACGATATGTTTAACCTGCTATCCGTCGTCGTGTTTTTACCTATCGAATTACTCACCGG
TTACTTGTATCACATCACCAACTATATCATTGAAGGGATGGAATTGAAGAAAGGAGATAA
AGCTTACAAGAAAGAATTGCTAAAAAAAATCAACTAAACCCTTCACGAAACTGTTCGTGC
AGCTCGATAAAAAGGTCATTCTTGCCATCTCACAAGGCGAC
>cap3_Contig153
GTTTTGTTTTCGGTAAGGGTTCGATTCGTCTGCGAGAGCAATCTGAGGGTAGAGTCCACT
GCTGATGATCAGTTTCAATATGTTGATGTCACGGTGTGTGAATCTGCGGTTTCGCTTCGA
GCTCGCCTCGAGACTTGCTAAATTATGATTTAATTTAAAGTCGATGTCGTGAATATCAAT
CTGCGCACCGTCGTCATCCTCAGCGTCACTGTCCCCGTCGTCGACTTCTTCCTCGCCTAT
ACATTGTAGCTTTAACATTTTCCGTTTACGGCTATTACTCGAATGATGCTGACGTTTTAA
AGAAAGTAGTTCTTTACGTGAAGGTTGTTTTTTAGATCTCGACCAATCAAAAGATGAGTT
CATCTTTAATGCATTATTAAGCAGTCCGTAATCTTTCAGAAGGTTTTCAAATTGTCGTTT
CAACTTCGAAATCTCGTAGAGACGTTGCTCCTCGATTCCGCGTCGTTTACACCATTTCCG
AGAATTCGATTTTCGATCGGCCTTGACGAGAATCCACTCGTCATATATATTTAGCAGTGA
GAATGCATCGCCGTGTTTCGAAAGAAGCTCTTTCCGACGACTTTCGTCACTCGGCGATCG
CTACTCGACGAAATACGTTTCGTAGAGAGGACGTGTGCACACTTAGTCGCTGCAGAAA
>cap3_Contig154
GTGTGCACCAAGAAGTCCACCTAACACTCTAATATTAGTTTCAAAAACTGACACAACAGC
ATCAGCGTTAAACGACACATTCGTGATAACATATTTTACTTGAGTTTCAAACTCGTCCAA
TTTTCCAAGAACAGCAAGAGTATCCAGAGTATCAATCAAGGTAAGAGAGAAATTTCCTAG
AGAATCATCAATATCTCCACGGTCAGGTTCAGAACCACGATAGCGACCTCTACAACTTAA
TGGCATTAATTCATCAGCAGGGAATGCATGCTCCTTGTATGCTCCATATGCATGCTCAAA
CATTTCCATAGCAATGTTTTTCAGCGTCTTCTTTTCTTCATTACTCATTGAGGCACTGGC
AGAATCGACAACAACATGTGAGAGTATGTTTACTCCAATAAAAAGAAATAACATCATTGT
GCTAGCAGAAGAGTAAGCCATTTTTAGAAACAAGATTTGTAATCAAAGTAAAGTATTCTT
TCCGTCAGAGTGTAAAAAAATAAAATAGAATTCGGTCAAAGTAAAAATTTTGGCTAAGTA
AATAAAGGTTGTAAATCCCAGCAACCAGATGAAAAGTCAATGGTGTGTTGTTTTTTAAAG
TGATTCTTTTCTTGGCTACATTTTTTAAATGGAATTCGCATGGAATGTCCTTGATTCCTC
AGGCTGATTGCCTGATCAGGAATCAGGNTATAATTTATAAAGTC
>cap3_Contig155
AGGAACTTTCAAAGGGTCCCTCCTTTAAGTACATGTTAAGTGCAGTGACTCGTGGACACT
GGGGTGGCATATGGAAAGCTCCCAGACATTACTCGTTCTTAGGAACAAGTAAGCAACTAA
CAGATGTCGAGTTTATAAAACAGTTCGATAAATGGAAATACAACAAAGAATGGTGGCAAG
GTCCTGCCAAACGAATGCCCTACTTGGAACTAAGACCAAATAAAAACAAGGACTTTTAAC
AACAGCATTTTACCCTGCATCACATGAATGGGGAACTATCATCTCGCATAATTCTAATAA
TGTACCATCGAAATGGATTTACCCAAA
>cap3_Contig156
GCTCTCTCCAATTTATTGTTTTGTTTCTCTCTCTCATTTGGGGGCTAAAGGGCTTTCTTT
TTCCCAAAATGTCCAAGTCACATAGTATACAAATGGCGAATTACATGTACATGAAAACGA
CAAACAATTACTATAAAGAATCATTTCAAGTAAGTCCTGTTGATATTGGAAAGATTTTGT
CTCCCTTTTTCCTCAACAAACCAGGTGTCAAATGCCAGCGTATCAGATTGATAGTCTTAC
AGGCCAATTCACGTTCACGGCTTTTAAGACCCGCAAAACTACCATACAAATTAAGTACTT
GCACATCGTTTTTGAACGCGCTCCCTTGGAGACTAACAAACATATTGAAATCATCATCGA
TACGAGGGCAACAAAAGATGGTAAACGTGCCGTCACCATTTT
>cap3_Contig157
GTAAAAGAAGGGTTGATCCGAGAGTATACTCGATCAGCCATATGGTTGCTATAATTACAA
GAAAGAGTCAACATCTTTGCCTTCACCTAAGATTTAACTTAAACAAGGATTTATAATTTT
GAGGTAAGATAAAATATTGGAGGCCGAAAAAGTAGATTTTAGGAAACTAACTTTTAAGAA
TAATTTATGTATGGGATAATTAAACATATCAATATAGAAATAACTTATATTTTACGCTTG
ATCTTTTAACAAAGGAGGAGTTGGTTTTTGAGTAAACATATTAATATAAAGAGAAAGAGT
TACTGTATTTTACGCTTAATAAAAGAAAACTATGTCTTTGATAGGTGCCGTACATGTACC
TGTTCCTTTCTCAATAACAGAAAGAAATAAGTTAAAAACAGGAAATGGGTTTGTTTATTT
AACAGGTAACGTACACTGTCCTCTTATGTCTGTTGTGTTTGTACAGGAATGCTAAAAGGT
GCAAAAATGATTAAGTGCAATCATGGTGAAATAAAGTAAAGTTTTCGATCAAGTGTCTAC
CTTTTAAGAAAAATAGG
>cap3_Contig158
ATGGCAGATGTTGCCAGAATATTGACCAGTGAAAATTTACCTAATTTTTCAACATCTGCA
TCAAAATTCAATGGCAGATTGATGGTCGCATGTCACAAATTTTGTTGCATAATGTCAAAA
AATGTTGCAGTTCACTCAGCAACATTAAACCTGCAGTTTATTTTTTCCTGTTTATCAATT
TTCTGCGTTTCATAAAATGCATGGTGGGATTTTCTAAAGCAATTAAGACAATAAAGAGTA
TTGCATGTATTAACAAAGATTTTTATGACGTTATCTAAATAGAATCATACAAAATTTTAT
GCAACAACTTAGGAAGGTTTTGAGATTCCCATTGTTTTTATAGTTCAAGAAATGTAGAAT
TATAATCTTAACCATGGAATCATTTCTAGGATGCTGTTGATGATGAATTCGAAGCCCTGC
C
>cap3_Contig159
CCTTCAGCTACAATATCCACTTTAAGTACACCCATCTTTGCAAACACACCCAATGGTAAA
CTTCCACTCCACATGTTATAGTAGAACTCAATTCTTTGAGCACCATTTCCAACCATTGTA
CGACTAGCTACAACACTAGAACGACCAGAGTCTCTGTCATTTTCTGCTGTCACAGCTAAG
AAAGAGCCTCCTTCAAATACACGATCAGTTATTCCGGTCTTATTGGCTTTGACGTGTGCT
CTTAACTTCCATTGCGCTTTTGATAAGGCGGCTCCTGGAAATGGCGCTTTGTTAACCATA
CCTCCCATTCCACGATCGAAGGAGATGTTGAATTTTAGGATTGAATTTGCTGGTATTGGC
TGCTTTGTGGTGCTAGGAGCAGAGGTTGATGAACTAACAGGCGATGGAGTCGACGAACTA
ACAGGCGATGGAGTCGACGAACTAACAGGCGATGGAGTCGACGAACTAACAGGCGATGGA
GTCGACGAAC
>cap3_Contig160
AGCAGGTCTGGCTGAGCCAGGCATCATTGATTCTCTTAGCAAGCCGTAAAACTACAAAAA
TACTGATTATATCTCAGATGGTATTCTCATCAGGGTTTCACTAGATAAGATTTGTTCATT
GCATGGTTTGTCTCCCATGTAATCGATGCATAACATCTGGACAGAAGATAATGGAATATG
CAATACTAAACGTCAAACTTATTCCTCAGTAAGAAATAAAGCGAGTTTGGTTGATATTAG
ACTGTGTGGATCGGATATACATAATTGATTCCAGGGAATCTATGCCCAAGCCCACAAGGA
ACAAACATGGAGGGAACTACCCCAACAAGATGTCCAAAGTCTGAAGTTCAAGATACATCA
GTGCATATTATCCTAATTATTCATGAGAGGCCAAGAACAGTTCAGTTAAGACTATTTTAC
AGTATCAGACAAACAAATTCAAGTGTTCTATTAAATAGCCATTTATAAGAATGCTC
>cap3_Contig161
AGAAAATCGATTCCGCTTTCATTGGAAACAGAACAATGGCGTACGACTGGTTAATCGGCT
TATGTGTGGTTTTGGTTCCTAAAGAAATTTAATCTTTTCCTAAAGACATGAATATTATTA
CTGTTTCAAAAAGCTAAAAATAACATCTCAACACATCTTTCTCTTTACTGTTTTGATTGA
TCGTTAAATTTTTGTTGTTGATTTGAGGGGTGAAATCTTTTGCTTTTTTTTTGCCGAACA
ATATTTGGCTTATTTGAGAAATCAGTTGTAAGGTAATAAGACTATAACTACCTTTGGTTT
GATTTTTTTTTTCTTATTTACATTTTTAAAAACACGTACAAAGATACAAGTAATGAAACT
AAAAAAAAAATCACATATAAAAAACAGACCACGATATAGTTGAAAGTTC
>cap3_Contig162
CGAAACACCAGCAGAGGAACCCGAAACACCAGCAGTTGAACCCAAAATACCAGAGGAGGA
ACCCGAAACACCAGCAGGGGAACCCGAAACGCGAGCAAAAGAGCCCGAAACACCAGAAGA
AGAACCGGAAACGCCAGTAGAGGAACCCTTTGAAATTATCCCAGTAGCACCCGAGGTTGT
AGAAGCACCTGAAGTACATGAATCCACCACTGTAGAAGAACCTGAGGTACCTGAAGTCAC
TCCTGCTGTAGCACCTAAAGTTACCCCTGATACACCTGACGTACCCGAAGTCACTCCTCG
CTGTAGCAACTGGAATTCCTACAGTTGCACCCGTTGAAACACCTAAAGTATCTGAAGTCA
CCCCTGTAAAAACACCTGAAGTACCTGAAGTCACCCCTGTAGCGGCACCGTGAAGTACCT
GAAGTAATCACTGTAGAAACATCAGAAGTACCTGAAGTCACCCCTGCTGTAACACCTGAA
GTACCTGCATTACACCCATCGAAACACCAGAAGT
>cap3_Contig163
AAAAGTCCGTCTACAAACAATGGTTTTGGTTCTCCACAACTTCTATTGTAAGCTCTCGTG
AAATATTGCCAAAACCTTTTTTCCACGTGGCGCTGAGGGTGTAGCTTGTGAAGGCCGAAG
GACTGCGTACACTTTTCTTTATCTTCTAGGCATCTACTTGACCTAAAGAAAAAGAAAAGT
CGTTATAAGAACAGCATATTCCATTCATGCATTGACCGCAATGCGCAGGTCGTGCAAAGT
TTGTAAATGTATTTGCATGTCAAGTAAACATTGAGCGGGTACTTTGTCTAAGCAACACAT
TCACCATAGATCATACATACAGTTATCTCACGGTTTCCCAATTTTGACTCTAAACTCATT
AACTTATTAACTCATTAACATACATGAATTAAAAATTGATATTCTCTTTTCCGATGTGTC
AAATGTCAAATCTCATGCAATAATTAAACCAATCTTAATTCTAGGTAACTAAATCGATCC
AATAAATTCTTGGCTAGAAGCTACAACTAACGAAAAT
>cap3_Contig164
AGCGATTAAGTGAGCTGTCTAGTCTTTACGACGAACTTAAACGACAGACCGCCGTTGTCG
CGAAATCTCGAAACATGCGAAAATCACTCCATTCAAATAGTAAGGATGGTGCTTCTACAG
TCGATCAACTCAAAAGAGAGTTTTCGACTTTAGTCGATCGTGTGGCTAGCCTCAATGACG
AAAAGAAAGCTGCTCCTGGACTTCTTCAAAGAAGCACAGCGAT
>cap3_Contig165
GTGCATCCTTGGCGGTGCAAATTTGATTTGGATACTGTCATCAACTTCGTCGATGATTTG
TTGCATTGGATTGAGTACCTTTCTGATTTGATTTGCGGATCTGCCAGCTACGTGACTGTT
GTACCATGTGTGGTAAATGATGTTTTTGTATTCTGTTGCTTTCCAACGGTTAGTCATGGT
AAATGTAAGTCTATTTTGGTATACCACATGCTTCTCCTCGTACTCTATACTTTGAAGTGC
TTCCATTATGTGTTCCTCGAGAGGATCTGTTGATTTCGTGGTTTTTACTGGAAACGTATC
CTTTTCCAGATCAAAGGTTGGTTCATTTTCGTCTTCTTTTTCTTCTTCTTCAGCTTCTTC
TTCCATCGGAGTGTTTGTCCGATTCGTGTGGGTCGATTGATCAGATTCGGATTCATCTTC
TTCATCATCAATTTCCAGATCTTCATCTTCTTCTTCATCATTCTGTTCTTCATCATCATC
TTCTTCATCTTCTTGATTCTTG
>cap3_Contig166
AAACCACATCCTTTGTGCCTTAAAAGAGCACATGGATAAAAAACTGGAAAAAGAAAACCA
TAAACAAACATATCGAACTTGGTGCAAGACGAATGGAGAAGGATGAGTCGGATGTCGAGT
CAATTGTAAATACAATCAACTCCTGGATACCAAAATTGTACAGTAAAGATCAGCCTCTAA
TCAATTTGAGCAATGGCAAACCTGCCTCACCAGAGATGATTTTGAATGTAAATACAACGT
ATGATCGAGGAGTGTCAGAAAGAGATCTTTTTATTGGTGGTTTAGTGACTTATAGAGATA
GAGTATCTGAAGATTCCAGCTTGAACTACCACAGCACGATAAAAAAACAAGTGGTTATCA
CATTCCAAGACAAGAAAAAGGCAATCAAAGCTAAGTCCATCTCTGCTGACGAAGGAGAGT
CATTTCAATTTATATTGTCGATACGATGGAAAGATCCTAGAATGAGAGCTCCTCCTCAGA
TGGCCAATCACCAAGACACCATGGATGATATGT
>cap3_Contig167
ATTTTAGTAGGGTCGGGCATTTAATGTGCAAACTCGTACCCTGTGCCGTCATATCGTCGC
CGCTATTATACGAGATAAAAGCACTGGGAACGAGGGTGATTTAAGAAGGTAAAGAGACTT
TAGAATAACAATCTTTTCTTTGTTTCCCAACTTCCTTTTCTTTTTTAGGGTTTATTTTCT
TATCTTACAATTCTTCGTTTGATCCAATCTGTTCTTGGACTTTCACCAAAATCGTCTTAA
TCGTTTTCTCCATTTCCATTCGGTTGAATTTCATGCTTCGAATTTCAGTCTCTTTATTTG
CAATTTGCATCGTCAGCGAATTGGTTCGTTGCGAGGCAGTGAGCATGCGCTTACGCATAG
CATCCATATCTTCTTCCAATTGTTCGTATTCGTTGGAACTGAAAGCGGCGTTTTCTGCCG
AACGCTGTGTTTCTTCTGTTTTTCTCTCGGCACCAACTCTCAAATGATGTAATTC
>cap3_Contig168
GGCTCATTGATCGAGAAATTCGCCTCAACTGATTATGATCAGGAGTTTGATGACTGTTGA
ACCGAGTAAACTGTGATTTAGAAAATGAATTTGAAAGGGACACACTTTCATCGCCAGGGA
CATGTGAATATCCATCAATAGCAGACATGCTTCTCTGAATCATAGTTTCCCCGCCATGAC
TTTGCGAGTTTGTTCTAAGAATAAAAGAATCAGTTCTATTTCTTGGTGATGGTCTTGGAT
TAGGTGTACTGACATGTGTTGTTCTTGGTTCCTGCCTCACCTCAAAATCAGCTGGAGTTG
CTTGAGCAATAACCTGTGTAGTAGATGTCAAAGCAGTATCTAACTCTGATTGAAAAATAT
TATCATCAGAATAAGATAAATTTGTAACACAATCT
>cap3_Contig169
GTATCATCATATGTTGTTCAGATGAGAAAAATGATAATTTCTTTAATGATATACGAAACA
CTCTGAATATTATTAAAGAAATTATCAGAGTGTTTCGTATATCAGATTGATTTTCAATAT
TATTGTTGTTCTGTTGTTAATAGCGACGCGCTGTTTGTGTTCCAGTTTCCTTTATCGTTT
TCTATGGTTTGATTTACTGATCTATTTCAAATAAAAATAAGGTGCGCTATTTTAACGGCA
CCGAGACATTGGTCACGTGTTAAATATTTTTATGTCGTTTATGTTTTAGTGAATTTAACA
CGATATTGTAGATTGTAGCAAAAAAGTAATTTTTTCACATGTCTGTACTATATGGAATTT
TGTATGGCACCGTAAATTTTCTATTAAGCGCCTTGTGGCGATGCGGCTCTTAATCAGGGC
GGCATGTAATTGACTATTTACAGTATTTG
>cap3_Contig170
ATCCAACATTCGTTCTCTACTAAACAGAAACACCAGATTTTGTTTGACGGATGTACACCA
AGAATAATTCGACGCTATCAAAATTTATTTTCGTGAATCTACCACACTCATTCTTCGATC
CTGAGCTCCCCACATACATCTTAGTTGATGCAGCCAAACAAGGACTCTCTTGTCAGAGCT
CAAGGATCTGACACAGACAATACTGATGTTGTTGCCTTTGCTAGTCGCACAACTTCAGCT
GTTGAAAGACGATATCCGCAGATTGATCTCGATGCAATAACAATTTATTTGGTCTTCGTC
AGTTCCGTGAATACTGTGTTGGAGGAAAATATTCATGTCGTCACTGATCACAAACCATTA
AAACCATCTTCGAAAACAACGTCTAGGTTCAATACGCATCGATCGTACAAAGCTACGTCG
CCAAGACATTGA
>cap3_Contig171
GCACCAATGACCAAAATGGTAACCCCTTGACTTCGGATATCGAATGCCAAGTTGATTGCT
TCAGGTTGTTTTGAACCTGCATTTTCAACACCATCAGTTAAGATGATCAAGACTTTGTTC
GCATCTGGTCGCCCGCCATTTGCTGGCTGGAAGACATCTTGTCGAGCAAGTGTAAGTGAC
ATATCGAGAGCTTTGCATCCTTTTTCGTGTTTGAATGTTCTCACTTCTTCCATGAACGAC
GAGGTATACATGAATTGATCAAGTGAGATTCGAATCTTAGCTGTGCTTCCACATGTGATA
ACGGCAGCGTGAGTTCCGACATCGATGATGTGGAATCGTTAAAATGAACCGAATCATGAA
AGTTTTCATGGCTTCAAATACGGCGGCGTCACTTTGTGAAGCATCCAAGATAAAAAGCGA
TGTCGGCAACAACGTTTTCGTACCTGTGAATAGGTTTGCTACCTAGGGGTCTGGTAACG
>cap3_Contig172
ATTGCTTTCGCCTTTGGGCTGGGTTTAGAACGCTTCGCAATGAAACTATTTCAAATTCCA
GACATTCGTTTGTTCTGGAGTGAAGATCGTCGCTTTCTATCTCAATTTGAAGAGAACGAA
AATGCGACTTTTAAAGCGTTCAGTAAATATCCACCGACGTATAAGGATATTTCGTTTTGG
GTCGACGACGCTGATTTTTCAGCCAACGACTTGTTTGATATCGTGCGTTCGATTGCAGAC
GATGTTGTGGAAGAAATGCATTTAGTGGACGAGTTTAGCCATCCGAAGACCGGACGGACG
AGTCTATGTTATCGCATCACGTTTCGGGCGATGGATCGGACGCTGACAGACGAAGAGGTC
AATGCAATAGAATCTGAAGTTAGAAACACTGTTGTGACAACATTAAAAGTGACATTGAGG
TAGTGAAGAGTGAGAATTAGGCCAATTAATTTTTACATTTTAATATTTGAATATTTTATC
ATTTCGCCGAAGGAATATTGGAAATGGAAGCTTGTTTTATTACTTATTCAACACTGTTAT
TTAGGTTCCATTCAAATATGAATCTCTTGTGTTCGGAAATGTGCGTAGTTTTTGTTTTTT
ATATTCTAAGTTGTTTGG
>cap3_Contig173
CTTATTTTAGAATGGAATAATGACTCACCCTTAAAGACAATTTCATTGAAAGCACTTATG
GTGATGCCGTCGTTACTTTTGCAGAAACCTTCAAAGACTTCAAAAACTAAAGATCATCAA
GCAGCTTTGGAGAGGCGCCTCCTTTTATGGATCAATGGTGACATTCCAGAACTAGTTCAC
GAAGTGGAAACTATTCAAAAACATCTAGTGTTCAATGGTAACAGAAAGTCGATAGCGGAA
ATATCTAAATCTTTTAAAAACTTCATGAGAAAAGGAGAGATAAACTCTGCTTTAAAACTT
TTATCGGAAAACATGCAGAATGGTATATTACCACTTGATACAAAAACCTTAAATCTCCTG
AAATAAAAACATCCACCACCTGAAGAACCGGATCCTAACCTAATCTTTGATGATGAACCT
GAGAAAATACACCATATTCGGTTTGAGTCAAT
>cap3_Contig174
GAAAAATCTAAAAGGGTAATTCAACCCCTCCCCCTACATTTAATCGCAAAGGAATTATTT
TTTCAAGATAGAACTGTTATAAATCTGTAACAAACTGTATTGACAAACTAAATAATAAAA
ACAAAATTGATATAAATATCTCTATATGTAGATTCCAGGATATCATAGACAACTAGACAA
CATAGACTAAACAGTTTATTTTTCTATTCTTCTTTCATACTGCAGCCTGGTGCGTAATTG
ACTGAATGAATATTTCTTTATTAACCCAGAACATAAGAGAAATTCGTTAAATCTATTTCT
GGTTAGTAATCCACCTTCGATAAGCTTGGCTCCATATTTTCTTAAATTAATAATATCTTC
TTCACTAAACAAGCATTTCCTCTTATGAGGGCTATTTACCACTCTTCTTCTACAGAGAGA
CCTAGCCTTGTCATAAATTTGCCTCGGGGAGGCATTTAAGTCTTTGAGGGTAATACTCTT
ACTCTTGACCTCTATTGTAATCAATGGGCTTGGTAATGTCGAACGTATCTTGAGAATTTG
ACATCCTC
>cap3_Contig175
AAATTGATAAGAACATGTACCAATCCTGCTCCTCAAAATGGGGGTAGAAAATGCGCTGGA
AAAGCAGAATATGTTCGAAAATGTAACACGAAACTCTGCCATCCTCCAGTACACGGACGA
TGGACTGCGTGGTCTAAGTTGAGCAAATGTCCAGTAACTTGTGGAGGCGGTTACAGAAAA
TGACAAGAACATGCACAAATCCTGCTCCAAATATGGCGGAAGAAA
>cap3_Contig176
ACCATACAGTGGCGGAGAGGCAGCAAAATTTTTATCGGTCCAAAACAGATTTAGGGCGGC
GAAAATACGTCATTTATGAAGATTTTTTTACTGATAGAGAAGGCTAGATAATAATATATT
GAATTAAAAAGTCATTAGAGTTATATATAATCGTCCGTATGTGCACGTGCATTTTACAGC
ATCTTTTATTACACTAGAAGAAAGGATAAACCATTGTTATTTTAACAAAGCAACAAATCG
TCTCGATATTTTGACTAGATTTTGAGCTTGATGTACGATTGCTTTATTGAAATAAC
>cap3_Contig177
GCATTTTCTGGATAGAGATCAACATCTAGTGTTCCATAACCACCAATTTGACGATCTGCG
GGGAAGGTGAAGCTCTCTTTGTGTGAAGGAATCTCGATATGAACAGCATCTAACTGCCAT
GTTGTGAAGATTCGTGGTTGCTCATGTCCAACTCTTATCTTTCTGATTGGTCCAACATCG
AGGGACATAAGGGTGGCTATGTGGGTATCATTTGCTCGAATGACTTTTAGAGGTAATTTT
CCTGTGTTTTTCTTCTTTCCAAATATGTTGATATATACATTGGGTTCAATGCAGCCATCA
GGTATGTCACCAGTCTTTAAGTGAACAATGTACCTTCTCATCTCTGATTCTCTGACAAAT
ATATCAGCATCAAGGGTGCATGATCCACCTTTAGTTCCAATCCATCTGTTCGCAGGGAAG
GTATAGACAGTCTTGTTGTTGTCTGTAACAGCCACTCCGAGTAGGTACCAGC
>cap3_Contig178
CTTATCAAAAGCATCCATGATGATCACAGCTATCGAAAACAAAACAATAACAAAATCAAA
ACATTCATATGCGATTTGAAGTATTCTAATTCCATCGCGATTAAACGAACGACAGCTTCA
ATCGTAAAGATGCCAGTGAAGACAAAATTGAGATAATTTAGTGCTTGAGTGAATTCTTTG
GTTTGATTGTGATGTTGTATCATCATCGTCGTCATATTTAGTACAATGACAGACATAATA
AAGAATTCAAAATATTTCGAAGATGTGAAATCAAATAGTGTGCCTCGCCACTTTGATTTA
GGTCTTTTTGTTATTCGACATGGTTTTTTCAGAGCAGCAACCTTTAATGTATTGATCCAA
TTTCTCTGTTCGCTGGTGAGAAATATATGTGCTCCATCCTCGTACTGTTGCTTCAAACGA
TTGAAATTGTCAATGATGACACCAATAAAGAGATTCAGAATAAAAAATGAACCAAGCAAA
ATGAACAGTACAAAAACATTAGGTTCATGTAGTTTCTCTATAGCCAGGCTGCAAGCCAAC
CCTCGCACATCGTGTGCATCAGCCATAGCCTCAAACCAACCCTCCAATGTTGCCGTTTG
>cap3_Contig179
CTGTATCATCCCATGGCATGTTTGGATGGTTCCACTGAACCCAAGATAACTTTGTGCCAT
TGTGGGATACCCGAGGTGAAGAGTAAAAGTCATAACCTGAAACCACAACATTCTCTTCTC
CTGTCTCGACATTAACAACAACGATCGTGTTCACCGGTTCTGGATGATTGGTGATGTTTG
AGTGGTCTTCACGCACACAGAACAAATGTCCAGGTTTGTGGAAGTCAGCATCAGCATACC
GAAGGTTCTCAGTTGAGGTGACAGCCACAGGTGCCCCACTATCTTTCTGTTTGTATATCT
TCCCATCATCAAAGTTCGAAAAGTAAATAACACCATCATTTACCATGAGAGCGCCACCCC
CATACTCATGCACCTTGTCTGCAACATTGAACCCATCCTTGGGGGTCCAGCGTTCTGGAG
TCACTGATGTTTGTGTGACATCGCAGCTGTAAACAATAGTGTGACCAGAC
>cap3_Contig180
TTCTGCTGGACCAACAAGCGGTAGTCTTCTTTCACACATTTCGTTTGATGGATGAACCGA
TGTCCCTGACATTTATGAAACTCAGGAGGAGAACCAGAAAGATCACTGTCAGCAACAGCC
GAAGTACTGTCACTGTGGTGTGCTGGTGACGTTGAACACTCAGACAATGGTGGTATCGAC
GGTACCAATTCCAAACTGTCATCAACAGGAGAAGCATTCGTTGTTGGTGAAGCAACATCT
GTTGGTAACGACGGCAGTATCAAACTCTGATCTGTTGCTAATTCGCTATTGGGAGTGGAT
ACTTCTGTAATGTCATCGTCATCCCCAATCATTTCATTCAGCCCCTGTACACTGGAAGAA
GGGGCATCCAACATATTCCCATCGGCAGTCTTTCTTGGCTGGCAGAATGCCATTATCGAT
TTCTCAGGCATGATTTTCTTTTTGTTACAAACTCTGCAAAGTTCACA
>cap3_Contig181
CTTGCCTTTGGTGGTGTAGTTATTTAAACTTCAATCAGATCTAACTGTTCATAGAAATAC
TGCAATCAACACCTTAGCTTACTTCTTATCCGTGCATCATCATCATTCACCAGTCGAATA
GTTTTTCATTTCCCTTAAAATTCTCACTTCTTCTCACATAACTAATTAGCTCGCCATAAT
AGCTATAATAGCTAGCAATACGACAATATTAGTAATTTGGCTACTTGAATACAAGCCAAA
TAATTATCAACATGGTACACAGAGCTTAAATTCACTTAACCATGGAGTTTTAGTTTTGAT
GATGAATTTAGCTTGAATTGTTATTGACATCATAGATACAAAACCAAATTGTAACTGAGC
ATTATATTTTACTAAGCTCATTCTCCTACAATAATTGAAATTACAACAATTGGTGTGTTC
TGGATTAATTTATTACTTGCCTGTTTAGCTAGTGATCGTATAGCTAAACCATCAGAGGAC
AATGATAAAGTTATTTCTTTAAAGACTCAGCAAAATGAAGCTAGTAAAACAGGTGGTGGT
GCGAAAACGTGCTTCAGCAGCACAATTGAGAGTACAAAAAGATCTTTCAGAATTACAGCT
TCCAAAGACATGTCAGACAGAATTTCCTGATAATGATGATTTATTAAATTTCAAATTAAC
AATACAACCAGATGAGGGTTTTTACAAAAATGGCAGATTTATATTCACATTCAAGGTTGG
ACCAAACTATCCACATGAACCACCAAAAGTCAAATGTGAGACAATGGTTTATCATCCTAA
TATTGATCTGGC
>cap3_Contig182
TTTTTGCCAAAATATTTACCGGTGTTTAATTTAGTTTCGTGAAGAGTCACACTTAAGAAA
TATGCGAGTCGGAAGTCGAAATAAATAATGAAGCAAGCATATTAAATGTTTCCTATAGCA
TCCATTGAATCTGTGTCTTTATGCCATTCATTTCATTCCTTTTGCATAATTCGTGAAGAC
GATTATTACTACTTATCCACCTTCTCCACCTTCGGTACAGGCTTCCGATGTAACTAACGA
CTGTCCGGCGGTGAAAGGACAATCTGACCCACCATTGGCCGGGGGCGGGTTTGAACAACA
CTTGTAACGGTACCTGAAGCCAGGCCCAGAACTGCCTCCACCTGTAATATGACACTCGGT
CCAACGCGTCCAATCTGCCCATTGCCCGTTGACGGGCACATGGGTGTTCGGTTGCAGTTT
TCAGTCTCCATTCCTTCGCCCGGACATGTTTTCCCGCCGAAACGTGCCGACGGCGCATCA
CACGTACGCATTCTGAATCGTGTACCGCTTGTTCCGCAAGCAGCTGTACACGCGCCCCAG
T
>cap3_Contig183
GGTACATTGAGAAAAGACAGTCTTGGCACACCTCTATCTGTTGTCAAGAAGAAATTGCAG
AAGGGTGAAATGGAATTTGCTAGTAACAAAGAAGTTACCGTGGCCAAATGGAAAGACAAA
AGAGAAGTTTTGGTAATAAGCAATGCCCATATCCCAAAAATGGTGGAGGTAACGAACAGA
TATGGTAAAAAAAATGAAGCCAAATGTTGTGCGTGACTACAACAATGGAATGTCTGATGT
TGATCGTTCTGATCAAATGCTGTCATGCAATACTGCATTGAGAAGGTGTTTGCGCTGGAA
CAAAAAAGTTGGCATTCACCTAATAGCAATGATGCTGCATAATGCTGCATAATGCACATT
ATCTTTTCAAATATCAATCAAAACAAAAGATCAGTATTAGTGAGTTTAAAGCAAAAAGAT
GGTTAAAGTGGTTAATAGGGGACGTACAAAATCCAACAAAAATTCAAACAATAGCTAATT
TTCATTATTGTTGCCAATCCCTGCTACTGAAAAAAGAAATCAACC
>cap3_Contig184
GTCTGTTAAGTTGGTAAGAGTCTTTGCTGTAATGAGTTCTTTGACGCAAATATTTCGGTA
GAAATTACTGAAGATTTATCTATAACCTAAATAATACACTTCTTTTCTCGAGATTCATCA
TAAAAGTTGAATAAGTTGATAACTTGGCGTTCAAGAAGTTTCATGAATTAGTTAAGAAAT
AAGAAAGCATTAGTTTTATTTGAAGATCAGCAGTAGTATACCAGGTCGTAACAACTTAAA
CAGGTGTAAAAATTTATACAAAAATGAAAAAAAAAATTACAACACTATCATCTGATACTG
ACATACTGATACATTTTGCAGGATTAAAGGATCATAAGGATCACCAAATCCATTACTAAA
ATGATGGACCAAAATAAGCTTTTTGTAATGTCACTAGCAAGCCGCAAATATTATGAATTT
ATATGAGAAACATCCGAAATCTGATAAGCAGTATTGTGAGCGAATGAAA
>cap3_Contig185
CCCGACGGGGAATTTCCCAGTCACCAAAGAATACTTGAAATTATTATTAGACTTATTAAA
CGCCGTCATGGCTGGGGAACTAGCGGAAGATAGTTCTTCGAATTTAAATGGAATTTTGAA
TGACTTGGCTGTCAATTTATCGTTCGTCATTAAAGAGATTTTTGTGAACTTTGGAAAGTG
GAGGTATTCAAATGCAGAAGATAAAGAAGTGATTGGTGAAAGATGTTTAGAAATCTTCCA
TACAATTCTTTCACCAAACTTCACTGATATAAAAATCAGCGACAACAAAAGTGCACCTTC
GTTGAAAGCTATAGTAAGGGAGGGCCTGCTTTACCACAATGCATCTGCTTCCCTCATCTC
CATCATCGGGATCGGTGTGGATGGAATCGAGACGCTCTTCTGCGACAGTGCTTGGCAAAA
TGCAAAGATAACGCAACTTGTCAAACTCTCGCTTTCTGTTATAAACAAATTATTTGCTGA
AACGGAAGAGAGTGAAGATGTCTCGCCTTTAGAAGAAGCGTTATGTCACCAATACGT
>cap3_Contig186
TTCCGATTGGCAGTCATTGATAACACGAAAGCCAACAGCAAAACAAGTGTTACTTGGACT
TACACTGCATCGATTAACTGGAAGCAAAGAGTGTGCCGATGAGCTTCATAAGTGTGCTCA
CTCTATATCTTACTCATTGATAAGACATTTTAATACTAAGTGGTCTAAAATGCATACATC
AGCTCACAGAAAATTCCAGAAGAATATTACTCTGCATTCAACGATAGACAATAATGACTG
GTGTCAGGAAACAGCAACAGGTGCTGGAACAACACAACACACAAATGCTACCCTTTTTCA
TATTCCGTTACTGAATGAGCAGATGATTGTCGACATTACCCCTACAAAACTTAGAAATAA
CTGTTGAAGAATATCCTATCGAAATACCTAAGTATTCAATGCCCAAAAAAGCTACGAGTC
GACCCAAAACCGTTACATTCAACTCTTATGATACTTGCAGCTATGATACAACTG
>cap3_Contig187
TTTCTTTATATATATATATATTAGTTGTATTAGCTGAAATAAATAAAATTGCTAAAAATT
GCGAAAGTCTTTCAAATGTCAACTAATGAAACCTTACAGCAAATGCAAATAGCATCCCCA
ATTGATCAGAAAAACATTTGCAAACATTTGAAGTCTCTTCGACTTCAACATTAAGCTAAC
ATTCGATCTTCTAGATTAGTAATTATAATTATTTATTCATTTGCGAAAACTGAAAACAAA
GACACGTTAAAAAGACGAAGACTAAAACTAGAATAACTAATAAAAGGTCTCTTATAGAGG
AACATCTTCGCTGCTTCTGAAATCCGATGAACGTCACCATCTCACAACAAGATGATGATG
TCGAAAATTCTGTACAAAAATGTAAATTTTCACGCGCATGTCTCTATAGTTCATTCCACC
TATCGTTTTACGCGTTTCAATGATTCGGATTCGCCG
>cap3_Contig188
TGTATTCAAAATCAATAATATCCTTTCTACATACGCAGTAATTATATCAGACTCGCTTTT
TTCACCACTTCTAAACAACAGAGAGAGTCAATATTTTCATACGTTAAAACATAGTAAGTG
AATTTCTCTGCTCTCTTTAAACCGGTTTTATCTACTTGTAGTGGTTTCTTGTACAGTTTT
CGGTTTTCGGTGATTTCTTTCTCAAACTCGCTATTCGGTGTGAAAATTATGGCGAAGTAG
TAACAGAAACACATGAGTGTGATAATAATAAGTTTTATTAACAGTTTGATTAAAGAATAG
GCTTTTAGTAATGAGATGTATTCCAATATTCTTAAAGAATACTGCATGCTAATGATCATA
ATTGTAAGATCAAAAACCTCATGCAGTAAAAGGAAAAATATCGCAATATGCAAATACCTC
GTTCAAATTACTCGATAGTTGCTCCACAATTATAATCAAGTTCGAAAAGAGCTTCAAAAC
CTCCCTTTGGTAACTAGAGCAAGTAGTTACGCTTACAAACGCATTTCTGAGTCTTGTATA
AGTCGTCAT
>cap3_Contig189
CGAGGCTAAATCAACCGAGGACGATAAAGATGATCAAAAAGATTACGCCATTACTTCCGA
GAAACGGCAAAGACGACAATGTCGTTGTGAGGAACCGCTTCAAAGTACCGAAGACCAAAC
TTTCATCGACCACTCCTCTCCCAGCTGCCACGACGAGTCACGGTGATCCAACTCCAACTG
AAGAGGAAGCATTGTTGACTCCTGATTCGACGACTTCTGATCGAAGTGAAATTGTTCATG
AAGACGAAGAAGATGAAAAGGATACGTCACTTTCGTGCGAAAGCCTTCCTGTTGCTAGTA
ATCCTACGACGAGAACCTTACGTCGCTCGTTAAGTGAATCCGAGGCAAGTCTTTCTGCAC
CTGATGGCGATTCCCTTCAAAACCTCATCTCCAATTACGTCTACGATACGGATATGGAGA
ACTCGACAGCCAATCAGAAGACGGGGATTCCCGCTTCGGTTATTACCTCTGAGACTGAGG
ATGATAAGGATAACATCCTCTCCGACCATCATTGCGAGTTTAAGAAG
>cap3_Contig190
TCTCAGATGACTATTCAAAGTACTACTTTGTCTAAATTCCTTTTACACACATCACATCTA
TATCCACCTGTATGAATCCTCATATGTGTTTTCATACAGGCGAACGTCTTTTGAAATGAA
AAGTTTATGAAAAGCAATTTAAACGTAGTCATTTGAGAAGACATATGATGACCCATATAC
AGGTGAAAAAGCCGATACTGGTGAATATTGCTTTAAATGTAAAGTTTGTGAAAAGCAATA
TAAAGAAAATTGTAATTTGAAAGCACACATGAGGACGTCCTTTTAATTGTGAAATATGTG
GAAAG
>cap3_Contig191
GATGTTTCACTCGAATTTACATAGCAAAATAATTGTAACTCGTTCTTAAATTTTTACTGC
AGTAACTGCAGTATTATCAATGGTGTACAATTTCCAAACATCAGAAACCTAAACTCGTTG
CATTTGATGCAACGAATGTTGTCTATGTGATCTAAGTTAGTAGCACACAACATAGTGATT
GTTTTGGAAGATTCCCCTCAACAAGCGAAAGCG
>cap3_Contig192
GAAAAACCTCATTGCCTTAAATCACCATTAAAGTAGAATTCCTCACATTCTTAATTAAAT
TTGTGTATGTGAAATGTACCGGTTAATCTGCAGTAAATACTATGTTGATTTCACAGCAAT
TAGAAATTGATTTATACCGTCAAATATATCAATAACATTTGTCTTTTGTTTGTATCTTGA
GATCACATATGTTATAACATATTTACAAATGTATCGAAATGAAGTATAGGTCTGTTCAGG
CGCGGCGCAGGGAGCTTCGGGGCCCTTACGATATTCCAGGTTTCGGGGCCCTGTTAAAGG
AGAGGAATTGCTGTTAAAGGAGAGGAATTGCTGGACCCCGCTTACCCTTCTGCGCCGCGC
CTGGGTCTGTTGTCAATTACATCAAATCATATGACAAAAGATGTATATTTCCCCGGAATG
CTAAATCAGTGTTAAAAGGTAAAACAGAAAAACATCTAAAATTCAAACCTTTTCTTTCAT
TTATCTTTTCGCACATCAAGACTATTCCCTCATTGTATCGTTTAGTCTTATATCTTTTAA
ATAATGCATG
>cap3_Contig193
GTTAATCCCGATTTGAAATGGTCTCATGAGAAAGGGTCAATTGACATGTTCACCTACATG
ATAAAAGTGAACGAATTGAATGCTGTGTTCACTGACTATGGATTGGATGACGATGACATC
ATTTTTATAAAAGAATTGATTGCTGGACAACCATTGGAGGAAAATGAACAGGATTGGCCG
TACAAAGGAAGGCCTGAAGAGAAAAGTTTCCTGTATGAGATCGTTTCAAATAAGAGATGT
GGAATCGATGTAGACAAATGGGATTATCTGTCACGTGATTGCTACCATCTTGGCATTACC
AACAGTTTCGATTACAGGAGATTTCTCAAGTATGCTCGTGTCATCTCATGCGACGGTCGA
CGACAGATTTGCACTCGGGATAAGTTGTTGACCTGGTATCGTTTCGTTCGACATTTTTGA
ACAGATTTCTGTATCCCGAGGTCAAGTCAGGCGTGCACGTGATATTTCAAAAGTGATGGA
AAATAGGGAATTTAAATCATCGGTGAAAG
>cap3_Contig194
TCGATGTGGACTTTCTACTCGAGATGAAATCTTGCAACGCCGCTCCCCAGTCCTGTGTCG
ACGCCTTCATGACGAGTGCACCCAAGTTCGCTTGAAGCCTTCTTGAGCGTTGGGGGACGA
TAAAGTCTGGTGGTAGGACAGGATCTCGTTCTTCTTCAGCTGCTTTTTGTTTTTCTTCTT
CAGCGCCTGAAAGTTTGCTGCTCATTTCGCTGTGTTCTTTTTGCGCGACGTCCATTCTCT
TCTCGAGTTCCTTCTTTTCACGAAGTACTTTTTGAAGGCGATCGTTGGCTTGTTTCACTC
GCACGTTGAGCTGCTTCAAGTACAGCTCGTAATCTTCTTTCGCTGTTCCCTTGGCGACTT
CCTTCTGTTGTCGTTTCCGTCCGTACTTCTCTTCAGCATATTTGAACATGCCATCGAGCA
GCTGCTGTTGAAGCTTTTTTTTGACTTCTTCAGTAAAAGCTGAAACAGTTTTTCCAGGTA
TTCTTTCCAGTTTCTTTAGAGAACGACGCAAACCAATCATCGTCGTCTAT
>cap3_Contig195
GGTGAATGATGTGGCGATTGATAAGGTGAAGCACTTGGTGATGATGCATTTGGTGACGGT
GGAGGAGTCACTGTTTGCGCGACGCGTTTAAATCTTGAAATAATCGTGTTTAAAAGTTCT
GTCAACACATGAAGAGCACTAGGAATGTGTTGGAGTAACGAATCTTTTAGTTCACATTTA
CGAGACATACTCATGTCCTCACGTGGGGAAATGAATTCTTCAGAAACCATCTGAAGAGCA
ATTACGCCGATAAGTGTAGTGTCTGTATTCTGTAGTAATTGCATAATATTAGAGAAGAAC
ATAGGATAAAACATTGGCCAATCATATCGGCCTATGTTAACAAGAACTTTTATTGATTTA
TTTCGGATAAATGTTGGAACTTTCGAATAATTTCGCATCAAGAAATCATAAAGAAACTTT
CGTATTATTGTTTATCATTTCCTTGCATCCCATGCCATCTCTGTGTCACAATTGTCTCAA
AAATGCTTAGTGCATACATAAGAA
>cap3_Contig196
GTTTTCGTTATGCCTGGTGTACAAATAGAGGCTAAATTGTTATCTGAAACCATAGGACTT
TCTTTTTCAAAATAATTGTTCAAGTTTGACCCATGTCTATTATTATACGAATCGATTTCA
TTTCTCGTATCGTCAGTAGTAGGGGTAATAGTAGTTTCAACAGTATTTGTTGGAAATACG
GAATGGTTACAAGGATGAAAAATATTTTGCAGAAACCCTCGTTTTCCTTTGTTTTGATCT
TTATCGTTATTGTGTTCTTCCCATTTCTTTGAAGCGGTTTTACTGTTCACAGTACATGAA
GGTTGTGTATAAGGGTCAGGAGGATTCGGGTAATATTCTAAAGGTAAAATACTACGTACT
GATCCCTTGCTAAAAAACATGGCAAAGCTCTTCATCAACTTCCAATTATCTGTCAAAGCA
TTTCTAAATTTTGTTGATCCTGAAGATGACATTCTTGCTAAATCGATTGATGGAATATTT
ATCGATTCCATACTGACACTTCGTTTTGTTGGAGTTGTCGAGTAATTCTGACTCGTTTGA
TAGC
>cap3_Contig197
GGAGTGAAAGATTTTGTTGGCTTGATAATCATTTCGTGGATCATTTCGTTTACCGTCGGA
ATGGTCAATGTTGTCTCCATGCACGACATCCATGTTATATTCTCCTCTCTATACTTGTCG
TTTGTATTCTTACTCCTTGCCACGTATATCGCCATCTTCAGAAAACATAAAAAGAAAAAT
CAGTTGAAACGTGTATACCAACAGACCTTTCTCGTCCAGAACTGTCGACAAGAAAAAGGA
GTGAAAGGTTTTTGGATGTTGAAATTATTTGCTGTTATAGTCTTTTCTTATGCTGTTTGT
GCAATGCCGTGGTTAACAAACGAGTTTAGAAATGCTTTGGGTTTAGGGCCTGAAGTAGAA
AGCCTTCATAAAGCATCAGTAATCATGTACTCTGTGAACTTTTACCTTCCATCTGGATCG
TGTGTATATTTGAGATGTATGCAATGGATGTCAGGAAGAGGAAAGACAAGAAAGCGGGTC
CATTCAACATAATCGATTTAGAGATATATACTAGAACACGGACCG
>cap3_Contig198
CTTTCTTCAACGCGAAGTAATTATACGACGGGGCTAATTCGCGGATGGTGATGTTCATCG
CACCACGTGGTAACCTCAACACGTGGTTGTACCCCACTGACATTCCATTTGTCTTCAAGA
TGTTGTTCTTGATGTACACCCATCTCTTGTTGCTCGTGTGTCCGGACCGGAGGTGAGGAT
TGGTCGGAATATTGGGTTGTTGTCGTCGGCCACTCACTCCGCCTTGCGATGTAGTCGGTC
TTGAAAGAACTTTATTTTTGGCTTTTCCCTTTTTGCATTGTCCTTTCAAACAAACGTACC
CATCTTTGTGACCGCACATCGACCCATCCTTCACGTAGCCGAACGACTTGAACATCTTGT
GGCCATCAGCCAAACAGTTCAACTTGCATTCGCTCAAACCGGCTCTCATGTAAGGTATCC
ACTTGTAGCTGACTCCACCAACAACTTTGTTTTGTTTTGCGCACAGCTCCTTTCGTTCAG
CATGTTT
>cap3_Contig199
CGTTGCTGAGACAAGCACACCTGTGTCCCCCAGATGGGGCTTTGATACATTTATGGTTAC
ATCCACCATTGTCAGGTCCGTCACATGGGTGAACTTTCTGGCAAGATTTTCCATTCCTTG
TTAGTTGATATCCTGGTTTACAAGTGCATTGGTCAACTCCGTTTTGGTTGACACAGTTAT
GAGGGCATTTGTTATCTTCAGAGCATTCGCCAACTTTAGTACAACTGCGTCCATCTTTTG
CTAAAACAATCCATCTTCACATCCACATCGGCCCTCGTATCCTTTACGATGACACTTTTG
TGAACAGCCTCCATTCTTCACTTCACATGGATGAATCTTATCACACATCCAGAAATGAAT
CAGTTTGTATCCAGGAAGACAGGAGCAGGCGTAGAGATCACCTTGCCGTGTGCACACTTG
TTCGCAACCACCTTTCGCTGGTTTGTCGCAAGGATGGTCTTTTATGCTATGTTTTGCCTA
TCCTTTTGCTAACTTGAAG
>cap3_Contig200
GGAGCGCCTGCGGGTTGTTGAACTGGGTATGGTTGTAGTTGCATTGGGTATTGCATTGGG
TAGCCATAGGGAGCTTGCTGAATAGGGTATGGGTAATTTGGATCATAACCGGGATAACCT
TGTGGGTAAACGGGGTATGGTAAATCTACAACTTCTTCCTCTTCATCGCCACTATCATCA
TCCTCGTCATCTTCATCTTCCTCGTAATCTGCAGATGCAGCAGCCCCACTTCCATCTACA
ACGTATTGTTCTGCATTATCTGCACCCGACTCCCCTGTATCTCCTTCTGACTCATCAGAT
TCATTTGCATCACCTTGACTTTCATCTGAATCTGAAGCATTTTCCTCTTCAAAAACCAAA
AGCTTAGCATATTCGTCCTCTTCATCGTCTAAGCTTCTTCTGTGACGCACTTTCTTCACA
AGTTTACTAAGATGCGATGAAGATTTTGCTTCTTTTTTATTGATGTTTCGTTTTACTTTT
TTGTTTTTTACTTTTAGATACTGCTGCACGTCGTGCAATGCTGTTCCTCCTCTTACGACG
GGCATTTTGTTTCAAATGACTCGTTGATTGGGTATGTGATTTCCCATGCTGAGCTGCGTT
TGGNGATTGTGATATCTTATTAATTGTGTGTGTCAGAACAGTTCCTTTTTGGAAGCAGCA
GTGTCGTTTAACTTTCTTCTTGATGGTATTTTCTTTTTCTTGTTTATTGGGGTATTTTCT
TAACTA
>cap3_Contig201
CTTATACTAATTAATAAAATAAATTAACTGATATCCTTCTCATGTTCCTATCTTCTATTA
TCAACAAATCCCAACACTAAAATTTCATGATCGCTAATCACCACTTTCAGCAGTTCAGAT
TATTCTTCAGATTATTTCTTCTTTCTGGGGAATCGATTATTGCAGATTTTGAATTTGGCA
TGATAACTCATTGATTTGAGGATTCATTTATTCCTTCAATTAAAGCATCTCTATTGAAGA
ATGATCAATACTACATTTTTCATCAAAATCATTATTGTTTTGTATGGTTGAGTCAACACA
ATTAATAGTGTACCCTAATGTTGTATCATTCAACACTTTCTCTGCTGGACCATATCCTTC
TTTGAATGTACCATCTGCATTTATTCCATGTTCTTCTAACACACGTATCACGTCTCTTAC
AAGAAGGAAGAGACTATTTATAAGCTCGCTAGTTGTTGTTAGTAATT
>cap3_Contig202
GTTTATGCGAGGAAGGAGCAGCGCTAGGACATGCGTCTACAACCTTAACGTTAATGAATT
TAATCCGAATTGGCAACAAAACCGTAGAAAAACATACGACTGCTTGAAATTGCGTGACGC
AGCCCGCACAATAACAGAAATTACAACGGGATTGCCGTGCCATAGAAACCGTCCCGTAAT
TGGCGAACGAGCTATTGATGTTGTTTTCCGGCGGGAACCGTTACGGCCACTCTTTAAAGA
ATTCAACATTCCAGATTTCTTAGGTCTTGACAATATTGTTAGAATAAGTGCTTCGTCAAC
TCCACTGATGTTAATGAATAAATTGTTACTTTATCATGGTGCAAATCCTGACTTCAATTT
CCAACGAGCCTCCAAGATGAAGAGGAGAGTTCTGACAGACCTGAAGGCTGAGAAACGTGA
AGATTACAGTAGTGCTGTTGGTATTTCAATACTTTATGAACGAGCAGGTGGGATACTAAC
ACCGGACATGAGAGCTGCAATCAATAAGCAAAGGGAGAGAAGCACACATGGACAAACTTC
GAGATGAAATTCG
>cap3_Contig203
ATCTTTCCAACCTTTCGCGTGCTTGCTGCACCTGTTGTCTCTCAAACTGTAATTGCTGTT
GTAACAGCTGTAATTGGGATGCTGTTGTTGCAGCAGACTGCTGCTGGGCAGCACGCCGAA
CACCAGACAGTTGCGATAGCAGTTCAGCTATCGGATCAATGTTTTCTCGCGCAGATGAAA
AGGTAGTGGTTGAACCAGATGTGGATGTCATCATTGTAGATGAGGTGATGCTTGATGCTA
GTTGTTGAGCGGAACGTCTCGATCTTGGCGGAGGGATGTTCCGAACTGGATGGAAGATCC
GGCGAATATTTCTGTTCAGTGGTTCCTCCAAATCTCTTTGAGATCCACTTTTGTTGTGTT
CACTGCTGAGATGACTCCCTAAATCATCTGTTACATGGTTGGGATTACCGCCAGGTAAGG
CGGCACAAATGGGACAAATCACTTCAGACGCAGAATTTGAGTGTTCACCAGATACATGTT
CTGAAAGCTGTGTCTCACTTAAGCCTAATTTACCACAGTGTGGGCAATACAAAACGAATA
CGAAGATGCTTGATCAAATTGAAGATTCTCTCCACCATAAAATAATTACAAAATCAGACC
TTG
>cap3_Contig204
ATGCAGTTGTGATTGCTGGAGCAGCTTCTGCTCCTTCTGACACCTTCTCAGATTCTGATT
CACTATGATTTGCATCAGCTGAAGGAGAATCTTTGGAATTATTAGAATTTCCTTCAGCTA
AAGGTAAATCTGTCGACTCATTAGTACTATCTTCAGCTGAAGGTAAATCATTAGGATTGG
CAACGGCAGAAGTTGATTCTGTGGAATCTGCAGATGGTGTATCATCGTCTTCTTCTGGTG
TAGGAGATTCTGAGTTTGCAGTGAGACATGGAGTCTCACAATCAGTCTGAGATGTTGGTG
GAGGTGGAGATGGGGGGGCTACGGGTGGTGCTGCTGGCTGCGCTGGTTTTGGTGGAGGTA
GAAGTGTTAGACATGGTAGAGCAGATAGTGGTGGGGATGCTGCAGGAGGCGCCGCAGATG
CAGATGGCGATGCTGCGGTGACGCAGAC
>cap3_Contig205
AAAGCTAACGCATGTTTGTAGAGAATTGAGCAAATGATTTTGACGAGAGGTGCAGATTCT
TGGTATTATTGATTGGTGAAAAAACATGATAATATTATTTTAAAAAAATGTACGGTATTG
CAAATCTGTCGCTTCCCATTCGTGGGAAAATGTTACCGGCCCTACGAAATGGTGTTCGTG
TCGGAAAGAATCAACAAGTGTGTTGTAAATTGAGTCCCCGTTATTATGCTGCAGGAGCAG
AACCGTTCATCAATGGAACAAGTGGAGCTTATGTCGAAGAAATGTATGAAAGTTGGAAAG
AAGACCCCACAAGTGTACACAAGTCATGGGATGTTTTCTTTCGAAACTCAGAAGCTGGAG
CTGTACCTGGACAAGCGTATCAATCACCACCTGAAATTTATGGTCATCCAATGAGATATG
TCACTGAAGTTACTGTCCAACAACCTGCTACTCAATCGTCTCAAGTTCAAGTCACACCGG
ATGGATTCACGATCTCATTCAAGACCATTTAGCTGTATATGGCTTGATTCGAGCATACCA
GACACGTGGTCACAACCTTGCAGAATTGGATCCTCTTGGAATTCTCGATGCTGATTTGGA
TTCTAGAGTTCCAGA
>cap3_Contig206
TTTCTCTAGGGGATTCTTTAACAACAACTCCATAGTAGTTGTTTCATGCATAGGAGCCGA
AATCAGAATCTTCTTCTCTGGTTTTGCTGGCAATGAATTAATTGAAACAGAATACCAAAG
TCGATACGGTCTTTGAAATTTATTTGTTTGTGATAAGTCTGCAAATTGCGAGGAATTGCA
AGTTAAGTAATTATATACTTCAGTCTTTGGATCAATGGGTTCAGAATGTTGATCCTCATC
ACTGTCTGAATCAATTGTTTTATCTAAAGATAAACTTGATGTAAACTCAGAATCATGAAT
AAACATGAGACAGCCATCAACCTTGCCTACGTTTTTTGGAATGATAGAAATGTTAACTGG
AACAGAACTCTTTAGGTAAAACTGTAAAC
>cap3_Contig207
CAATGAACCAAAAGATCCAGAGGTGAAAAAGAGAAGGGACTTTGTGAAAAAGATGATGAA
AACCTCTTGGGATGGTTATCAACGTTACGCTTTGGGTCAAAATGAATTGCGTCCAATTGC
CAAGGTTGGTCATTCAGCCGGTATATTTGGTTCATCGTCGATGGGTGCAACAGCAGTTGA
TGCTCTTGATACGCTTTTTATATGGGCTTGAAAGATGAATTCAAACAAGCTCGTGATTGG
TGTGCTGAGCATTTGAACTTTGATGTGAGTACGTTTGTTTCCATCTTTGAAATGAATATC
AGGTTCATGGGTGGACTGTTGGCTGGATATGCGCTCACCAATGATCAGATGTTCAAGATC
AAAAGCGAAAGTGTTAGCTGACAAACTCCTTGCTGGATTCAATACACCGACTGGCATCCC
ATCGGGCCCTCGTCAATCTTCGAACGGGCCAGGGGATGAACTACAACTGGGCATCCGGCG
GCAGTTCTATTCTTTCTGTAATTTGGTA
>cap3_Contig208
CTTTTTTTGCCCCAGATGACATCATTAGGGCGACACTTTTTGATGCTTTTTTTGTTTGGT
TCCTATCACTTAGGACATTTATATGAGCCAATAAAATAAGAGACGATTCTGAGTTTCGAG
TTCGTTGTTAAGCGCATGTGCTCAGGTGAATTTAAGGTGAACTTTGTTTGAGGGTTGTTT
AACTACCTTCATTTTTTTGAAAAATTTAATATCTTTGGTCTTGATCTTAATCTTAATTGA
TATGACTTAAGGGGTGCCCAGTCATTTAATTCATATAATTTTTATCGTAAATGCTTAAAC
CTAACATATAAAAAATTTTCATTTAAAGTAACACAAATGGAACAAATTGGATAGGGTATC
CTTTTAACTTTGCCACTCTTTCTTTTAACTTCACCACCTTGAAATCTCAATAAATACTAT
CTGAAAGTCTAATATAGAGTCAACTTCTATAATCTATGAATTTTTACTAGACAGATATCA
CATCTTTTTAACCTCATTACGTAGTATGGCGAAACTGGTATTGGG
>cap3_Contig209
GTTTAGTTAAATTTTAAGTTTATTATTCTAATTATTAACCACTGGGCAGGTTAATAATTA
GAATAATAAACTTAAAATTTAACTAAACGGATGCGGTATCCTAACCGTAATAAAGTAGCA
TAATCATTCGCCACTTAATTGGTGGATAGTATGAACGGTTAAACGAATATTTACCTGTCT
TATATAGAAAATTATGAAATTAAAATAATAGTAAAGATGCTATTTAAGNTTGTAAGACGA
AAAGCCCTATAGAGCCTTAACTA
>cap3_Contig210
TTTAAAGGTAACTTTTTAGCACACATGAGAATGCATTCTGCAGATAAACCTTTTGTCTGT
AAGATCTGTGGAACACAGTTTTCTAGGAATAATAGTTGGATGCAACATTTACGATTAGCA
CATTCAATAAATGATCCATCTGAGTACGAGAGAAAGTATGATGGTGTTGCAGAGGATAGT
AATATTCTTAAAGAGAATAAATTTCAAAATTTAAATGGTGACATGAATGAGTTAGACGCT
TATAAATGCAATATATGTACAAAAACTTATTCAACGTTAGGGAATTTGACTCGTCACAAA
AAGGCCCATGCTGGGGATAAATCTTACGTCAGTCAGTTTGTTAGAAATCGTAACTCAAAA
TCAGGTTCAAACCAAGATGAAAATTCTGTCGAAGATTCTGAAAGCTCTCAACGTAAGACA
TTTCCAAACAGTATTGATGCAACAATTGACAGAATTAAGAATAACGGATTAGATATACAA
ATCTAAAAGAACTAGAAGACCAAGTAGTAAGGTTTG
>cap3_Contig211
CACATTTTTCGTCTGATAGATGATAATTCCCATTTTATGTGACTCCTCATCAATTGAAAA
GAAAAGGAATAACATGTGATCTGAATCTAGAATTTCCATCTGAAATCGATTCGTTTAACA
ATAATGCTGCTAACTATATGCAATCTCTTTTAAAGCCAATCTCCAAATCGTCACCTTACG
TAGATGCTTCTCAGAATGCAAAGCAAGTTTCCAATGACGATATGTTTCAGCAAATAAATG
CATCACATGAACAGATAATAAAATTAGAGCAAGAGAAAGAGCATTGGATTTTTGAGCATA
AATTATTGACTGCCAAATTTGAGAAAGAGCTAAAGAAATCATCTATGGTCAAAAAGAACT
ACAAGGCACACAGGGATTACGGA
>cap3_Contig212
TGGGATTGCAAGTATTCTTAACTGTGCNGGTTTTATTCAGGATTGAACCGTCTGAAGTTA
ACAATGACAAATATGAAGTATTGGATGGGACAAGGATTCATCCAGAAACTTATGATTGGC
CACGGAAAATAGGCAATAGATGCTTTGGAGTACGATGATGGCATGGATGATAATAATCCT
TCATCTGCTGTTGAAGAGATTTTAGAACAACCTGATCGTCTGAAAGATTTAGATTTAGAT
GCTTTTGCTGAAGAACTTGCCAGACAAGGTTATGGCAACAGACAAATCACATTGTATGAC
ATTCGTGATGAACTTATTGATAGATTTAAAGATCATAGAAATATATACACAGGATTGAGT
AGTGAAGAAAAATTTAGACTACTTACAGGAGAAACCCCCTCAAACATTATATATTGGTAA
GATGATTACATGTAAAGTGATAGGTTTTGCATATAAAAAACCATCACGGGAAGAATTGGA
TTCTGCTAATCCTACAAGAAATGATGAATCAAATTTATGGAAATGCCCGTTTTGTCTTCA
AGATTCATTTCCAGACTTAAGTGAGGTTTGGACCCTATTTTGATAATGG
>cap3_Contig213
CAGTAAAAGAAATATCGTCTCCAACTTCATGACGAATCTTAGTGTCCAATGATTCAATTG
AAATATTCATGTCTTTCTCTGCACATTTATCTTGAATAGCAGCTAAAGGTGGGATTGGTG
AGAAACTTGCTCGCCTTAACGCACTTTCAGTAAAAACATTATCATCGGCAACTGAATCAT
CAGTATCATTGCTCATGTGTTCGAAATCGGATGGTACTTTTAGAATAGGAGCCAACGAAG
GTAACCTTGGATCGATGGCTATGTTAGCAGAATGCAGTATACCATTGGATGAAAACTGCT
CGCTTACATCTGGATGATCGATCTCTTCACTTGACATGATAATTTTCGTCAAACTATTGT
CACAAGAAAGTAGCTCGAGCATGGCTGTTGCTGCGATATTAGTTGTCGCGTCGATACTTG
AATGGTCCACTACACTCTCGGTGACCATTCGTACTATTCATCAATGT
>cap3_Contig214
GTTTCCCGAATAAGTCAACATTAAAATTCATTAAAAATGAAGACATGGTAGCGCTACCCA
ATGAAATAGAAGTAAGATAAGAATTTCTCTTGGGTAATTTGGTGAATTATTACTCATTGA
AATAAAAGTACTAGAGTAGATAGAACTCTCTACATTGATAAATCATTTATCGAGAATAAT
CAGCATTAAGATCCAAACAATTGAAGATTTCAATTTCTCCTGATTTATCGAAAATTACCA
AAAATCAGAAAGAAGAGCAGCATTATTAAAATCCAGATGAAGGAACAGAGTTACTTGATG
ACATGGATGTTGGATACGAGCCACTTTCTGCCATACTGCGAGCCATCTGTTGTTGCATCA
TCATGTTCTGAAGCATTTTCAGGATTCATACCTTGTGACAACATATTATTCATCATTGCA
CTTGATCCCATAGGAGGCATCCCCATTGGGTTACCTGGACCTCCTCCCATAGGATTACCT
GGTCCAGTCATGTTAGGTGGACCCG
>cap3_Contig215
TTACTGAGAGCATAAATCCTTGCATAACTATTCTTTATATGACTGTAAGGTGTCTTTTTA
TAAACCATGTAGTACAAAATACAACCTAAACTCCATACATCAGACGATTTTGAGATCCTA
CAGTTAACCGTCTTATCTTGAATGAGTTCAGGTGCCATGTAATTCAATGTTCCCATTTGT
GATTCCCTGGTCACACTAGTCCGATCATCATGTATTCCATTGGCAATTCCAAAATCAATC
AATTTCAACATATTTCCAACATACAGAAAGTTTGCTGGTTTCAAATCGGCGTGAACAATA
CCGTGTTCATGTATTGTACTAACAGCAGTCAACATTTGTTTCCAATACTTTTTTAAGTCT
TCTTTTGAAATTAATTTTTCAGTTCGTAAAATCGCAGATAAATCACATTCGCCTTTTTCT
AGTACAATCAACAAATTGTCATTCACAACGTCCCAATCATACAATTGTATGATATGTTGA
TTTCCTTTC
>cap3_Contig216
AATATTTGTACTATGATTTTAGGTAGACGGTTGGTATTCATAAGTTCAACAATCATCAAG
AATAAGTGAAGAATTAGAAGTCATCGAAAATAATGTAGAAAGTCAGATTAGGAAGTGTAG
TAACGACAATGAGTACTTGTGTTTAACAAATCGTGCTTCCATGAATGATGATAATGACAA
AATGAATGATGATCTACAAACGTCAACAAGAATAAGTGAAGAATTAGAAGTCATTGAAAA
TGATGTAGAAAGTCAGACTAGGAAGTGTAGTAACGAGATAAATCATGTTTCCATGAATGA
TGATGATGACAATTATGATGATCCAGAGCCTAAAACATAATAAACAAGTAATAAGATGTC
AAGAACAAGAAGAATGGAGTGAGGCTATGACTGAAGAAATATTAGCATCAAAGAAACACA
AAACTTGGGAATTAGTTGATCTCCTGTAGGGCGAAATCTAATAGGTTGCAAGTGCAAATG
GAGACATTGATCGTTATAA
>cap3_Contig217
GTTGTCGTTAATGTTGATATACATGACGTGCAGCAAGTGAAGACGAGTTTTTTGAAACTC
ATGAAAGTGTCAAATCCAAGTAAACCAAGTTTAGAAAGAAAATTTCTCTCCGCTGTTGAA
GAATCAAAATGGATGCAACAGATCTCATCGTTACTCCAGGTTGCATGCTCAATTGTGAAC
TTGATTGACATTCAAGGTTCATCTTGTTTAGTTTCCTTCGGGGACGGATCTGAAGTCACT
GCTCAGGTGGTCAGTTTAGTGCAAATTCTATCGGATCCATTTTATCGGACAATTGAAGGA
TTTAAAGTTCTTATTGAGAAAGACTGGTTAGCTATTTGGTTACCGCTTCTCACACCGTGG
TAATCATGTGTACCCTGTGCAGCAAAGTATTGTCCCCTTTCTTTTACAATTCCTAGATTG
CGTATATCAGGTCATCTGTC
>cap3_Contig218
ATTGATCACATTGATGGATAAACACGGTATTGGAACAGATGCTTCAATTCCACAGCATAT
AAAGAATGTTCAAGATCGTCATTATGTAGATGTTTGTGGTCCTGGTGAAGATGGCCAGAA
AGGTGCTATCATTCCAGTCAAGAAATATTTTGGGAAAAATAATCGGGGTGGTGGTCAACA
GCAACAGCCAAGGCCAACATCTCGACACATGGTTCCCAGAGGATTTGGAATGGCCTTCTT
ATCTTCATTTGAATATTTAGATGGTGAGCTATGTGAACCCACTATTAGAAGTTACATGGA
GAAACAAATTACGAAGATTGCTACTGGTGAGACTGATAAAACTGATGTTGTGTCTAGTAA
CTTGAAATTATTTTTAAAAAAATTTTGTAGACTTTCGTCAAAATTTACCTAAATGTGATC
GATATTTTGCACCCAAGCAATTCACAGATGGTGGTGATGGTAGAAGAGACAGTTTTAATA
ACAATTTTAATAATAACAAACTTTGGTAATCAAGATAGAGGTAGGGGTAGAGGAGGACGA
GGTGGTAATCCAAGAGGTAGTAACGGTAGAGGAAGCGGCGGTAGTCGTGGTGGTGGTAGA
GGTGGATATAACAATTATGATAATGATCAAGGTAACCAAGGAGGTTCTGACAGAGGAAGA
GGTCGAGGAGGAAGAGGTGGAATAGGC
>cap3_Contig219
GTCGGTTCAATTTTGTTTCCGGTGAAAGCGACTTTTTTATTAGAATCTTCGGTAGTAGAA
TCATCTGTAGGAGTCGTTGGAGCAGCGACTACGTTCTCATCTTTTTCGAAAACAGGATTG
TCGTATTTCACTTGTTTCTCGTTATTCGTTTTCAAATTCTCGGCTTCTTTTGCATTATGA
CGTATCACGGCGTTCGCTATGGACATTGTTTCGATGACATACGTAACAGTCGCATAACTA
AACACGGCCAATATATTGAGAAATATCAAACCGAGAACCCATCCAGTTTCGGCGAAGGCT
TTCGGCAGGGCGAGTAAGGCTGCACCGACAATTAAATTAAAAACATAAACAAAAACCTGT
CTGCCACGAATATCCACCACCATTCGGTTTCCTTCCGCCATATTTGAAGAAGTACCCAGC
TATTCCAAG
>cap3_Contig220
GGATTTAAGTTCAACAATGTCTTTTCATATAACTCAAAACAAACACTTTTTAACAAATCA
ATTGATCGTAATAATATTAATAATATTGATAATATAGATTTAGGTATAACACTGCACTGT
ATGAATGATGGTAGAGCAGAGGTGTAAAAAATGTTATTAGTTAATTTCATACCAATATCT
AACTATTAAATAAATATTTAAGAAAAGTCATTTTAAAAACTAATCGTGTCCAACATGGCT
CCGAGACATTGTACGATGTTCGACGTCATCACTTTATCGACATTTTCCTCTAAATGTCGT
TTAGGGTCTTGCTTACCAAGTCGTTCGGTAGGCTAAGGGCCAACTACGTACGGGGGGGGT
ACTAAGGTCGTATCCTCGTCTTCAAGTGCCTTGTTGTAA
>cap3_Contig221
TTAAAAGAAGAAATCATAAAATACAAATATGCAGTAGGAACATCAAATAAAGTAGAAAGC
TTGAAAAACAATGCAAGAGGATTTGATTAAAAAACCTACCACAATTTTTACTCTACATAC
GTAATCAATAAATAGTTTCAAATCATAATATAAACAAAAGGAACAATGGCTAAATATTTA
TTATTTAAAAATAGTGTCACTTACAGATTTTCTGATACCTAACACAAGAATGATAGATAA
TTAAGACTCAACAACAAAAACCAAGATTTGTTTCAATATCATCTACCAGTTTCACAGCTG
CTATCGGTATTCTTGTTCCTGGGCCAAAAATACTGTCACGCCAGCATCGTACAAAAATTG
ATAANCTTGAGTGGAATGACCCCGCACAGACAACAACAATATCTTCTTTT
>cap3_Contig222
CACGCATCATTCCGTCACGAATTCTGTCAATTGTGATCCAGACATCCAACATATACCGTT
CTTGGCCGTGTCCACTGATTTCTTTAAAAACATGTACTCTAAATATTACAACCGAACAAT
GAAGTTCGACAGTGCCGCTAAATTTTTTCATCTCTGCACAGCATTTTTTGGTTCTATCCT
GTGATGATGCTCGCACGATTCAACCTCTATGCACAGAGTATAATACACAACACGATTGGT
CCTGGCTCGAAGAGCAGTGACAAGTATTACGAACTCGGTACTCTCGTCTTCTTTTTTACG
TGGTTCACGTACATGCTGACGTGCACCGCGTCGTTCGGACACGCTATGCTGTTCCTATTT
ATCTCGCATGCTGTCGCCGGAATAGTTCACGTGCAAATCTGCATCAACCACTTCCCGATG
CAGACGTTCGTCGGAGTACCGCAAGACGCATACGAACAAGATGGCTACATCAAGTCTCAA
CTTGTCACTACCACCAATATCGATTGTTCGCCATTCATGGACTTTTTTCATGGCGGACTA
CAGTTTCAAGTTGAGCACCATCTATTCCCTCACATTACGAGAAGTTGGTTGCGTTACGCG
CATGAAGAGGTGATGAAACTGTGCAAGAAACNTAGTTTGCCTTACTACAAGCGCTCGTTC
GTTCAAGCGAACAAAGATGTCATCGATAAACTATACAAAATCTCTAAAGAAGCCCGCGTC
GCTGAAGTC
>cap3_Contig223
GAAGCTCTTAGAATTATATATCATGTATAAAATTATATATAATAACTCTTTAACAAATTA
AAAGAAAAAGTAAAGCTGTAAAAATTAAATTTAAAATAAAGATATGCATCAATTATAACA
ACATTTTCTAAGGGAATAAATTCAAAAAATCAAAAACAAATAGGATAAAAAAACAGGCGA
GTATATTTAGACATGCCCATCAAAAAGACTTCCTCGTCTATCAATCAATGGTTGATAAAT
AGGATCATCTTTCTTTTTACATTCACCATTCTGTATCGTCTCATACGTCTGGTGCCCACT
GTTCATATCCATATATATCCCAGGGGAATCTGGCCCTGGCCCTGGTGTATGGAAACTAGT
TGAATCGTTACTACTTTGCGTAGATTCAGTGTCTTTCGATAT
>cap3_Contig224
TTGAGACAGACAAACAAACAAACTCCCTGGGTCATAAAAAAACAAAAATAAAAACTGAAG
ATTAGTCGACCTACATCTTTTCCACTGTGCTGTCCCAGTAAACTGCTGTAATGTACGGGG
GAATCCCATTTCGTGTCCTTCTCCTTCATCTGAGGACTACTCACCAAACTGTCAAGCCCC
CAAATATTTTGAGAACTTCGTGAAAGTCCGGGTGGTGGTCGGAGGTGTTCCAACGCCGAA
TCGTCAACAGTCGCCCACGAGTTGTCCTTCTTGGGGTTAGATCCTACAGCCTTGTTCAAA
CGTTGCCGAAAGGGGGACAAACTCTGCGCTATCCGGGGACAGCGTGCTGCTCGAAACAAC
AGGCGGTTCCACAGGGACCTTCTTTACTCCACTTCCAGGTGCCTTGGTGTCAATCGGTTC
AAGGTCGCGAGTG
>cap3_Contig225
GGAGGAGTATGGCGCCACCGCACCGTCAGTTGTCTCTTACATATGACAAAATATTATGCT
GGTTCTGGCTGTACAGAGGTGATTCATGGTTTGGATCCGTCCTCTAATTAATGAAATCTG
GTCTATCAACACCTTATATGGTTTATTTCTTGTTCGTATGCAGGGAAACTAACATAAGTC
AAGGTGAATGGACGTCAGCAACTGCAGAGATTGATGGACAGAAGCTTCTTGCAGTACGCT
TCATGTTGCCCGTCCAATGTCATCCATAATCATTTCAGGACTGGGTCATGCGGCCTTGAA
GATGAATGGAGGACGCATAACACCATGCATTGACAACTAGCAGGCGTCTTAGGCTTCCTG
TTTACTAATGCATTCTCTTGACAAAGCGATATTTTCAGAAGAATTTCTCTTTACGTCACT
ACAATTT
>cap3_Contig226
ACAAACTATAGGAAAAGTAGAAGTATTACATGTTTGATTTCGGTACAATTTGAATGGGTT
CCCATGGTTGCTATATTCAATTTTAGAAGAGGACTTGAAGAATTTCGCCATTTCAAGCTA
GACCTGCATCTTTTACTAGGTATAAACTGTCATAATTTTGGATGGTGCAATTTCATATTT
GAAAACCCACAACAGATTAGTCATTAAAGCAAACATCATCAAAGAATTGTCAAAGGGGAA
AAATCTGTGTTGAACTCTTTGATCCTAAAAGAAGAACTAGTATAAACAAGGAGATGGTCG
ATTTAGGTTATGCAACGCTAAAAACTTATGAAAACTGTGATATAAGTTCTGATGATGAAA
TCTACCCAAATTCAATAACTATACCTATTTCTGAACAGCCTCAGCACAGAGGATTATTGC
CTTTACCCAAACCTGAAACAACACCTGAATTGGTAATAATAGCTCAACCGGAGGAAAAAA
CAAATTCTGAGACAAGACCTAATGTTGAAATAAGGCAAGCACCTTTGCAAGTATCCGAAA
AATAGCTGAATCTGCAGCAAAAACAAACTCTAATACAAATGTTGAAATAAAGCTAGCACC
TTCAGAAGTATCTGTAAAACCTCAAGATTTGGAAGTATCTGAAAAAATAGTTCAACCTGA
GAGAAGAACAAACTCTGATACAAATAATGTTAGAAAAAAAGCCAGTACCTCCAGAAGTAT
CTGTGAAACCTCAAGATTCTGTGTCTGTGGTTTCATGGCATTCCC
>cap3_Contig227
GTGGAGGTTGTTGCTGTAATTTCGGATATGAATCAGGTACGGATGGAAATACTTGATGAC
CTTTAGGCGGTAGAGGAATCCATCTCGGCTGGACGTTAGGTATTAAAGTCCCACCCGGAT
TGACCCGGTGTTTGTAAGAAGAGTTAATGTGACAGTTGGAAAGAGTTTCATAACCACAGC
CGGCTGGTTGTATGTTATTTCCAGAAGCGTTTCTTTGTGCGACAGCTTGTGCTTTCAAGT
AAGCTATGGTATCCATAACTTGAATTGATCGTTGGACAGTTCGACAATAATAGAATTGGG
TGAGATGAGTGAACGTAAAAAATGGATGTCTCAGCATTTCTGATGGTTTGATTCTTTTTG
CAGGGTCAAGTTCAAGCATCTTCTTCAGTAAGTCGACGAAAACAGACCTATCAACTCTTT
CAGCCATGTTTTCACTTCCTGTTAAATTACTTGGGAAGTTTCTCGAAGCGATATCATCAA
GATTTTGAACACATATCTTCGATTACCTTCTTCCTTTCTC
>cap3_Contig228
ATTTGTTTACATAGAATGTAAATAGTACTAGTTGTATGGACTCCCGTTCCAATATGTTAT
ACTTTAACCGAATCCCGGTGGACCACCAGATACACCACCACTTCCGATCTTAAACACATA
ATCAGCACCAGCTCCACCAACGCACAATCCTTTACTAACTGTTTCGTCTTTGCACGGTGC
ATAGGTTCGTGTCGAAAAACATTTGTCGGATTTGAGCGATGTCTTTAAATCATTCTCTAT
GCTAAACAAATTTAAACCAACACATTCTCCCCAAAATCTCAGTGAAAAGTGCGAAAAGCC
TCTATCCTCAGCAAGTCTGGCACAAGCACATTTGGAACGAGCCCAATTCCATGATGTAGA
AATAGATCTCCTCCATAACATTGTGTAGCGAAAATTCGCCAACATCACCATTGAGCTTAA
CGGCTTTAGATATTGGTTCCCACAACCCAAAGGTTTGAACGTTATGTCCTTTTTACTACA
CCATACTTTGTTTTAGTAGAACAAGTAGTTCGTTTATCGGAACCTGTGCAAATGAATCCA
TCACCAGTAAAACCTTTCTTGCATTTACATTTGAAAGAACCAGGTAGGTTTGTACATTCA
GCATGATATGCACATGGTTGTTTCTTTGCGCATTCGTCGACATCTTTACAGGTCTTTCCA
TCT
>cap3_Contig229
AGGTGGAGGTGGTGGTGGTGGTGTTGCAGCTCCTGTTGATGGTAGAACTGTTGTTTGTGT
GGCTGTTGTAGCATTTGTAGTTGTTGGTTGCATCCCATAAGGAGTTTGAGCTGTTGGTGG
TGCTGCAACAGCTCAAACTCCTTATGGGATGCAACCTCCAGCACAGATGCCACCATCAGC
CCAAGGACAAGCTCACCAAGCTCCACCACCTCCACC
>cap3_Contig230
AAAGAGTTGGACAAACAATGCAGCTAATAAGCTGTCTTCATTTCAAATTTCATGAATAGG
ATAGTTTTTAACATTTCAAAAATAATAATCATAAGATGTAACAAAGCTTAACCAAATAAA
ACTTATTCATGGCAATCATGGCAAAAATGGTAAACAATGTCCAATATGTAACAGCACAAT
TGATAAAAATCAGCAGCTCCACTTGTAAATCAAATAAACACATAAAATGCAATCAAACTG
ATGTCAATTCTAATAACAAAATTGTAAAAGACAACATTGATGCTATTTTCGACAATGAGA
TTCCCAACTCAGTGGAAAAAATAAACTACTTAGTCAGCTTTTCTGACGCACCAACATTTT
TTTACTTTTTTTCTTTCCTTCTTTTGTACTGACAAGATAAAAAGTACTTTCAGGAACAAC
ATTAAGTCTAAAATTGAACTGAATGCAGATAAAGGTAGGTCGAAATACAA
>cap3_Contig231
AATTGAGAGAAATTGGCGTAAAAGGACAATGATTATTTTCGTTTACAGCACTGTTAGAAG
TCCAGAAGTGTGCAGAAGTTCGTTCAATTTGTAAATTTCGTAACGATTTCAGCGAACTCA
GTGAAATCAAGGAGTGCAAAGATATATCAACATTAGATATTTGGAGTTCTCGGAGGTTAG
TTAAACGTCCCAACAGCCAATAACCATTCGAATCAATACTTTCACAACTACATATCTTCA
ATTTCTTTAGTGTTTCCAGTCGTGTGAGCTGCTCAAGACTTTTCTCTGTTATGTCTGGGA
TTTGTAGAAGATTCAGCGTATGAATGTTTGAATTGGCGACGAGATGTTCCATACTAGAGT
CATTGAAGTTACATTGGCTTATACTCAACGGTTTCTAAGCAGTTCAAATTCCCAATATAC
TGCCAATCAGCGA
>cap3_Contig232
ACGAGCGAGATACATCAGACAATACGTAATTGTCTAGACTGGAAGTCAGGTTCTCAACCT
AAATTGAAATTAATTTCTCCAAAAATCAGCTTGACGCGTGCAGCGATCATATGTTTTTGT
GTCTTGCTTATTTGTTTGTAGTGCATGCATTTCCTTGAAACAACAAAATATTACTACTGC
GATTCAACCATCCAAACAATACTACTAAATGAATTTAAATTCATCTTTTATCTCAAGTTT
TCACAATCCAAACCAAATTTTGGTGTTGAAGCAAACCTCCAAGTTGATGAGTTATATAAG
CTGGTATATTTACTAAACTTTGTTTAACAGATCTTCTAAAACCGTCGTTATAGTAACGAG
ATTGTCCGGTGCAGAGAACCGATGGTCCGCGTTATCAACGAGTAAAACTTCGGCATCATG
ACTAGCCATCTTTTCGGCGAGTCGAAGCGAGTTTTGATACGGCACTAGCGTATCACTTTT
CCCGTGTATTAAGCGTACCGGACAGAATATTGGTATCGTATCGAACTCGAACAGTGAATG
>cap3_Contig233
TTTAGAGGTGCATTAACATACTTGCAATTGATTTAACTTGTTCATTATGCATTATGAATA
GCACAATTAAATCACATATCTATTTCTATAACTCATATTTTTCATTTTTTGATAGTTAGG
AAATAATGAACAATTTAATAGATCTACATTTACAGGGGCAAGTACTTTTAGTGGCATGCC
ATTGAAGTGTTTTATAATAGAGACTCTTGTGATTAATTACAAAATTGTTTTAGGAAATGT
AGACAAGGGATCAACTTTGACGTTATTACAGGTGTCGGTAACCCTGATGGTCTATGTACC
CCTAGATGGTATATTCCAACAAAATCGATCGGTTTGATAACAAATTGAATATATATAACG
ACTTATCGAGCTTATTTTTGTTATTTGAGTAAAATACAACTACGAAATCTGTAATTTGAT
ATGTTGAAATTTCAG
>cap3_Contig234
GGGAAATAAATCCGGGGAATGCACTCAAAGATGGTGGGATTCCCTTGATAGGTTCTTGAG
GGAAATCATTAGTTGTCTCAACAACTTTCTCAGCAGAATCGTCCGATTCAGCAACAGTTG
ATGTTGGCGAAACTCCTTCATCTTGCGTGGTTGAGGCGTCGTTGACCCCATTCTCATCAG
AATCTGTGGGAGAGATTGACGAAGAGACAACAGTATCGTCTGCCAACGATGGAGATTTAA
AGACAGTTGTATTAGACAGAAACGAGGGTTCTGGTTGGTTTGATTCAGGTGAATCACCTG
TTGGTATTTCACTTGTAAAAACATTAACATTAGTTAAACTTTCATTCACTGGTTTGGTCG
GTGCACCTTTGCCCCAAAAGCTTAGCGGATCAACAGTTGATGTACCACCAAATGTTTTAG
CAGCAGTAGGTACATCTGAAGGTTTCGACGAAGGCTTAGCTGCAAACTCTGAAATGATCT
TTGGTTTACCAGTAGCTTCAGACGAAGATAAAGGTGTTACC
>cap3_Contig235
GCGATATTTATATTGATATTTATATATTTGCGTAATAGAAAGCACATTATCAATTATTCG
AGATAACAAATCGTGAATCTGAAATAATTTTTGCTAATTCATAAAGTTTCCATATCTGTT
TGAAGCATGTATTTGATTAGAAAGCGTGTAGACGAACAAGTATGGCAAACAGTCGCTTAC
TCTTAGAATATAAAGAATTCTACGTTTTCGAAGATTTGAACTACACTTGAAAGCATAATT
CATGAGTGAAATATTTGTTCAAACCTTCATGTTTGCTTCCCTTTATCAAGACTACGCGAG
TCTCATTCTTCTTTAAATATGCCATAGAGTATGGTGATCGCCTTCACTGTGCTCAATTAC
AGACTACTATACTAAACGGACTTTTAACTCGAGG
>cap3_Contig236
CCTCATAACCTCATAACTTCGAAGTCTCAGACAAAGTTAGAAGTCGTGTCTTGTGCGATA
ACGCAGTATTATATGCACAGAGATAGAAAGCACCACAATATGTTTTTGCTTGTACTAGAA
CAAGGTTAAATGCCAATACAATTCTCATGATGCAGGCTAGTTTTTTACTATTTTATCTAT
TTTTTACTTTCTTAACAGTTACTGTAGCTTTACTTATTTAGAACTAAATTAAGTAAAAAT
TAGTTTTTACATTTAACTGAAAATGCAGCAGATGCAGCAATGTCCGAATCATCAGCACCT
TCAGTATCAACATCTCCAATATCAACATGTACTTCGATGTTCTATTTACCCTTATGATCC
AAGTTCAATTCCTCATCTGAGTCTCCATATTCAACTTCAGAATTACCATGATCAGAGTCC
AAATCTTCATCTTCGTAAGATTTAGTTACAATATCAACATCACTACCTTCACCGTCAATA
GTGAATTCTGTAAAAAGAACTCGTTTATTTATCAAT
>cap3_Contig237
GTCGGACAAGTCAGGTGCTAAGAAAATGTAATAAATTTAGAAATTTTATTCCCATTTAAA
GGTGGAAAAAGGTAAACCAAACCTTTCAACCACTTACCATAATCTGGTGAAATTATTTAT
GACAATGAACCCTGCTGTCTTAGCAGCAAAAGGCAATTGCCGCACATATTGCTTTTCATT
CTAAATGAAATGGGCATTTGCGAACTTTACAGTCGTTTTCACGAGAATAAATTTTTATGG
ACTTTAATTTCACAAATAAGAGGGTCAAGATTAGCGAATTTCGTAATTTTATTTCGCAAA
TTGGCAAATTTCTATCCACTAAAAAAAGTTGAGAAAAATGAAGATTTGAGTGGAAATGCT
CAATTTTTACGTGTTTTGAGGAATTTTATTTTGCGAATTGGCAAATTCTATCCACTATAA
AGCTTGAAAAG
>cap3_Contig238
CGATGATACCAAAAGACATTCAAACTTTATATCGACAATACCAACCAGGGGATGGGAAAA
ACAGCTTTCAATACGCCCCGTCTCAAGATGAGGTACGGGAAGAACGGAACTACGTAGAAC
ACAAGAACGAAAACACAAACGATCGTGAAGACGGGGGTATGAGTCCATTCATGTCACAAC
AAGATCCACAGATGTCAGCTGAAAACGATTATAATAATCGAATCGCTGAGCCCAATAGCG
CACCTATTAATCCGAATCGGGATTCACCATCTCAATGGGATCAAGGTGATCAACACATGT
CGGATGGAAGCAGGAGAAGTGATGTACCTATAGTTTTTACGAAGGAACATGTCGGATTTG
GTCCGATTACTGTTGTAAGCAAAAACGGCTGATGCACACCTGATGACCCTGCTTTAGACG
AATAGAGAATCATGTTCG
>cap3_Contig239
TTTGTCTAATAGTAACTAAAACTTGATTTATTCCCAGAGAGTTATCGCTCGTCTTCTTTT
AAAAAACAAACAAAAACGAGCGATATTACATTAATGTTTTTTTATCATCAATAATTTTTC
TATCAAAAACAATTTCTTTCATATACACGGTATTTTCATCTTTTTTACTCTAGTCGGACC
TAACGCCGTCGTCTTTACAACTTGACGTCAAATTCTGACGAAGATCATGACGTCATCATG
ACGGTAACTCCATATGACGTATTAGATCTATACTATACCGTTATTTCGCGTTCTTGAAAG
CTACTGGTGCATCATGGGAGAGCGTGGAGCTTTCGCGCATGCGTTTTAGAAGCAGTTGTA
GCAAAGATTATCTTCATTTAATAATATTATTGGTGCTACACGATCTCTTTAGGCTTCTCT
TCTAATTCTTGTGTGTCGTTCGTCTCTGTATCGACTGGTAAAAACTTCTTATCTTTACTG
GCGCAAAACGTTTCGAAGCAACAGTGACTGAAGCCGCAGTTGTTGAAGAAGCAACAGAAG
AGATCGACAACAATCAAAAGGATTAATATAATGGCGACGATGATACCAGCAATCTCACCA
GACGACAGGCCCCCAGGCATCAGAACAGAAGGCTCAGTGGGTGGTGGAGTCTCTCGTGTT
GTAAAGTAGAATGGATCACCTTCTTTGCCTTTCTTCCCCTGATTATACGCAATGACAGTG
ACACGGTACTTGGTCGTTTCGATCAACTCGTTCAATTTCAGTTTGCTTTTCTTTTTCTCT
TTTAGTAAAACTATCCTTGTTCAGTTCGAATTGACAATCATACAATAATTGGTATGGTAT
GT
>cap3_Contig240
GACAAACTTGGTCCATTGAAAAGCTGGTTGGACTATGGCTGAAGGAAAGGATGCGATCTA
CAAGGAATTTGTCTTTAAGGATTTCAATGAAGCTTTTGGATTTATGTCTCGAGTTGCTAT
CAAAGCTGATAAGATGGATCACCATCCAGAATGGTGGAATTGTTACAACAAGGTGCAAGT
TACCTTAAACACGCATGATTGTGGAGGTGTGTCAGTACGTGACATTACCCTTGCAAATTC
ATGGAAGAAAT
>cap3_Contig241
TTGACTTCCATGTGACTAAAAAAAGAAGAAAAGAAATATCATATAGACATTTAAGAAATT
TACGAGGTTTCAGTCCCGTCCATTCTCACCCTGGTATCGGGTGATTTTAATTCATGTAAA
CAATTGCAGTTCATACCATCCCCGTTATTGCAATCAGTCATATTCTTTCGTATTTTACGA
AAAAGTTTCACCGAGTCCCGACTGCTTGTATCATCCATTGAACTATCGTACGGAATTCGT
TGTGTATCGAGTTTCGTGTGATTGTTTACATGAACATGATGTCCTTTCATATCTACATAG
TCATCGTGACGTATGCGTCGACATTTATTATTATTGTCTCTAACGATGATAAATCGCGGG
TCTCGTTTTGATGCCGCCGAGTGTCCACGTGTTCTGCACGATTTCGAACGACAATCGCAC
GTGCGTGCGTTCGACGATGGAAGAAACATTCGACTATCTTCCTGATCTGTTGAAAACGAG
CTACTACATAGTGAATCGGTACCAGTA
>cap3_Contig242
GGCTATTATGGCTGCTACTCAATTGGGAATTGGTTACTCAGTTGGTAGACTAACAGCTCG
GCAAGAAAGAGATATTCTAATGGTTGATTTCTATTTTGTTGAAAAAGTTTGGTTCCCTGG
GTCAGGAACAAAAGAGACCCCTTCACACAAACACAATGACTTTAGATTTAAATCGTATGC
ACCAGTAGCTTTTAGATACTTTCGTGATTTATTTGCTATTCAACCAAGTGATTTTTTATT
ATCCTTAGCTAATGAACAGATCCGTGAGATATCAAATCCAGGAGCTAGTGGTTCTTTGTT
CTTTTTATCTAACGATGATATGTTTATTGTCAAAACTGTTCAACATAAAGAAGCTACTTT
TTTACAACAATTACTTCCCGGCTATTATATGAACATTCATCAGAACCCACGTACATTATT
ACCAAAGTTTTTCGGTCTTTACTGTTACCAGTCAGGAACATCAAATATTAGATTGACAGT
TATGAACAATCTTTTACCTTCAAGATATAAATGTACATAAAAAGTTTGATTTAAAAGGC
>cap3_Contig243
TCACCTTTGATTACAATGGCTGCTATTAATGGTCCTGCTCCTGCTGGAGGTTGTGCCTTA
TCATTGAATTGTGATTATCGTGTTATGGTTGATGGTGCCAAACATGTTATTGGCTTAAAT
GAAACACAACTTGGGCTAACAGCTCCTTATTGGCTGTGCAAGTTATTTGTATCAGTTGTT
GGTTACCGCACAGCAGAGAAATTCTTATGTTTGGGAACTCTCGTTAATCCTCAAGAGGCT
TTGAAGATCGGTATGATTGACGAAGTCGTGTCAGCCGAAGAACTGATGCCGACTGTTGTT
AAAGAGATGCAAAAATGGCTAACCATACCTGATGTTGGACGTATGAAAACTAAAGAGTTA
CTACGTATGGAATATGTGAAAGAATTTGAAAAGTTGCGTGAATCTGATTTAGAAGGTTTT
GTAGCTGTTGTTAATAATCCATTATTGCAAAAGACATTAGGAGGGTATTTGCAATATGGA
TTATTAACAACAGACA
>cap3_Contig244
GTGAAACTAACCTGTCTCACGACGGTCTAAACCCAGCTCACGTTCCCTATTAGTGGGTGA
ACAATCCAACACTTGGGAACGTGAGCTGGGTTTAGACCGTCGTGAGACAGGTTAGTTTTA
CCCTACTGATGAAGTGTTGTTGCAATAGTAATTCTGCTCAGTACGAGAGGAACCGCAGAT
TCAGACAATTGGCATTTGCACTTGCTTGAAAAGGCAATGGTGCGAAGCTACCATCTGTTG
GATTATGACTGAACGCCTCTAAGTCAGAATCCGTGCTAGAAAGCAATGATAATTACCTCT
GGATAATCTTAGGCGAATAAGAATAGAACAGCTTCAGTTGTTCCTGAATCTCAATGCACT
GACCTAGAGAAAAACTAGTGAGGTGCTGTCATTATCAAATTCTAAAATTTTTTCTAGTAG
TACTAAATTCTTACGTAACAGAGGCTTAATCTCAGAAGATCGTAGCACAGAGGCTACTCT
GCTTTTTACAATACCACGTTCTTGTTTAAGTCGTCTGCATAGGATTTATCTCTGAAAATT
TTAGAATTTG
>cap3_Contig245
TTTTGTGCACCAATCTGCGGGGTTCAGTTCTCCTTTCACCCACGCCCAATTTTCCAGCTT
ACCGTCAACGAAGGTGGTCGAGGTTTGGATTTCAGCTACTCGAATCCCTACATATGGATG
AAACACACCATACTCCTTGTTAATATAACCTAATACAGTTGAGCTATCAACCAGGTGGTA
AACCTTTTCAAATTTAAAGTTTGTAGTATTACAGAGAAAGTTCTTAATACGGTTGCCAAG
AACAGCTCCATTAAGTTCCATACGAGGAATCAATACTATCTTCTTGGGAGAAATCTTCCC
TTTTGCCATAATAATTCTAGTCCAGAATTTTCCTGACACCAATCTCCATCATATATATGC
CACTGCAAGGCTAATGCAGAGAAGTTTTGCCTGAAGAAGTAACAGAATTAGAAGTCCCAT
TGGATCAAAGATACGATGAACATTAGAGATCAGTCCAACTTGAAGATTACTAATTGTTCT
GAAGACGTAATATGAATATCTTCACCACGTTTGACTTTGAAAACTTAGTCACAACACATT
CTGAGCTCTCACCACTGATAGAAATCTCACTCACATCATCACCTGAGTACGTCCACCCTT
TGTTCGGCATGCCAGCATGTTTCAGGATCTCATCATGTCTGGATGTTTATAGAAGAGCAT
GCTCTTTATCATCTGCAGCAATTAGATCATCGT
>cap3_Contig246
ACGAATGCGGCTCTGTTCCGTCTCAATAATCTCAAAATATGCGGTAGCGTTTACGTTCAA
GGCAACGAGGTGGGGATTGGCATCGTACCATTTCGATTCCGAAACTGACTGTTATATTTC
GTACGCGAGTCCGTGTTGCTTACTGTGTCCGTCGTTAGACAACGGTGATCGGCCGCCGGT
CCGAAAACCGTTTGTGAACTTTCGAATCGACGAAGAAAACCGACTATTTACGGGTGAAAT
ACATTGGGTTCCGACCTCGTGGCAAGGTAACGTGTGCTGGGTTTATCGAATGCAATTCTC
TGAAGATTACGAGGAGATAATATCAGGGACACTTGTAAAATATGATTCTATTAGTAGAAG
AAATATATTAGGTGTAGTCGAGTTCGGGCATAAACTGCGGTACAGACGTTTGCAAAGCAA
CGATTTGAAGAAATTATTAAGTTCTGAGTTACCTTCGTTATATGAAGTCTTATGAAAAGA
AAAAACAACAACAACATTTTGTTGTACATATTACAAAAATATTTCTTCATGTTGTAAGAG
GTATTTTGAGTTTTTGGGTTTCTTCTACGAAGGAATATTTCCTCGATTTATTTCTGAAGC
GCGAAGTATTATT
>cap3_Contig247
GTTTCCAGCTGGACATTTCATACAATTCTCTCCTTTTGCTGCACATTTTTCACATTTCTG
TGTTCCTCCCATCTTGACATTAGTTACACCGACGTAGTAAATTTTCAACCTTGAGTCAGC
ATATTTATACGTTTGACGATCGGGAAAGTACTTCTTTTCGAATACCAATCGATAACGCGC
TGGAGCACTGGAATGTCGAACATAACTATATGTTGTACGGGCAGTTTGACCTTCATAGGT
TCGAATAACATGAAGCGACTCATCAGCATCCATCAGTTCAATTTTGAATCTACATTTATC
AGATGGACAATGAATGGAGAACTCAATTTTGAATTCATTCTTCTCTTTGGTGAACTCGGG
GATGGTGAGGACCATTAAGAGTTCAGCGTCATCAGAGTGTTGTGATCCGGTTGATATGTA
TTCGTCTTGTGCAATCCATCCCACACTTGTCTTACAACCAGTTCTTGGTTTAGCGATAGA
C
>cap3_Contig248
GCAAAACTCTTTTGGATCACTTGGAATATAGGACGGATCTCTTGTTACTTTGTGAATATC
ATTTATTGTCTGGATGTTACCTTGTTTTGCAGATGCACAAACCAATCGACACATAGATGC
AACGATACATGCTGTAGAGGAACTATCAATGCCTCCACTAAGAGGAAGAAAAATCCACCA
CATTCAGATCTTCTAAGATAATCCCACAACCAACAAGCAGGTCCAAGTGCAATTTCCTCT
TCCGGACTGTATATATGAGGTTTTATAATTGAAGTTTCAGGAGCACATAAACTATCACTT
CGAGTCAATGAAAAGTCCAATTCAACCCTTTTATAGACATGGCTAACGCTAGCTTGAATA
CCAAAATTTGGACTGCGTCTATAAGATGATACATCATCTAAGTCGACTGTTGCAGTTACA
ACATCAATTTCATCTACAGAAAATTGTTCGCCTTGTGCAACCAGCTCGCCGTTTTTTACA
ATCATACATGACCCATCATAATATACACGTTCTCCATCACAGCCTTTGATGTTTGCATAC
AAATATATTCCACCATTCTTAGCAGTAG
>cap3_Contig249
TGCAACCTGTGTTCGAACTTGTAGTATCCCAACAATGACCAATTAACTGATTTTCAATGC
CATTTTCATCAATTATTCTTACCAAAGCGTCACATTGTGCAGCTCCTGTTCCATTTGGCA
GTTGAGGTGCTCCAAGAAATCTACCCTGAGATACTGACGCCACTTGTTGTAAACATATGA
TCAACCTTTCTTGGACGTCTCCTGATTCATAAGAAACCTTTCCATCAAAATGAAGTATAC
TGTATGGACTATCAACTGAAAGGCTTTGACATTTCAGTTGATAGTCCATACAGTATACTT
CATTTTGTTGTAAACATATGATCAACCTTTCTTGGACGTCTCCTGATTCATAAGAAACCT
TTCCATCAAAAT
>cap3_Contig250
GATGTGACAGGTTTACCAGGGTCATCATCATAAATTTTATGAAAATTTTCCAATAGTTTA
TCAAGAGCTTGATTTTGATAGTTAATCAGAGACTCAAGTTTAGATTTTTTGTCTTTTTTC
ATCTGCAAATCACTTATATCATATGAAGCTTTCTTCTCTTTTACAGCCCCATAATGAGAA
GCAATGGATAAAGGGCATGGACTTTGTACTCTATCAACAGCATCATGAGAAGATGAAAAA
GAGGGTTGTGACTTAAAGATCTTTTGAACACTATCTTTCTGATGAACCAGTACATCACTG
GATGAATTAAGAAGTTGCTTTACACCTCCTTCGAGGTCGATATCATTTTCTCAACATAAA
CCTGCATCAAACCACATTTACAAGATAATGAAGTTGTTTGGAATGCAACATTTCCATCAC
CCAATGTACATGCCTTAGAAGCTAAAGTCTTTCTGTAGTTCATAGAAAGTAATTATGAAC
A
>cap3_Contig251
GCCATTTTGCCAGCCTCTTCATTACTGAAGTTCTTGATGCCTTGGCATCTAGAACTTCAG
TAATGAAGAGGCTGGCAAAATGGCGGGCGAAAATCCTGATTTTGCTATTCAAGATCTTTA
TGATTCAATCGCGAAGGGAAAACACCCGAGTTGGTCGTGTTTCCTTCAAATAATGACATT
GAAACAAGCTGAAACGCATCCAGATAACCCGTTCGATTTAACAAAGGTTTGGGCTCATTC
CGAGTACCCGTTGATTCCGGTTGGAAAGATGGTGTTGGATCGGAACCCGACCAACTACTT
CGCAGATGTCGAACAGTCCGCGTACTCTCCTGCTCACATGATCCCCGGGGTGGCTGCATC
CCCCGATAAAATGTTGCAGGGACGTTTGTTTTCATACGGCGATACTCACCGCCATCGTTT
GGGCACCAACTACCAACAGCTTCCCGTCAACTGTCCGTTCAGCAAGGTGAAGAACTACGA
GCGAGACGGGCCACAGTGTATCTACAATCAAGGCAACGCACCCAACTATTTCCCTAACAG
TTTCAGTGGGCCTGAAGAGCAGAAGGAGTATAAAGACCCCGTCGAAAAGTATTCTGGAGA
GACTGCACGATATCAAAGTGGC
>cap3_Contig252
GGATTAAAGTTTTTTGCACAAGTTCCAGATTTTCGTGTCCTTTGTTGCGGTGGTGATGGT
ACAGCAGGCTGGATTTTGTCAACTATAGATCGTTTAACCAGCCTCAAACAGAGACCTGCA
ATGGCAATTCTTCCACTAGGTACAGGAAATGACCTTTCAAGATGTCTTGGATGGGGAGGA
GGTTATGAGGGAGGTAGCATAGACAAACAATTAAACAGAATTGCAAATAGTACTGTTGCA
ATGATGGATAGATGGCAAATCCATTGTGAAAATATCGATAACTCAGAAGAAGTAGATAGT
ATACCGCAATCTATTATGAATAATTATTTTCTATTGGTTGTGATGCTTCGATTGCGTTGA
AATTTCATTTACAAAGAGAGAAAAATCCTGAAAATTTAATAGCAGGTTTAAAACAATTAA
GGTATTTGAAGCTAGGAACTATAGAACATTTAG
>cap3_Contig253
GACTAGTTGATCTTGGTTCTGATCAAACATCTTTACACAACCCATTTAATGGGGGCTACT
ACCCAGTGCAGTTGTCGTTTGATGAAGCCAATGACATGATGCATACGGATCCTGAGAAAT
TCAAAAGTCTCGTTTATGAGAGTTTACGTCGGCAGGTGACAGCTATCGACAAATTATGCG
ATGGTGGAATGTACTTCTGGGATTATGGGAATGCTTTCCTCTTACAAGCTAGTCGTGCAG
GAGCTCCTGTTTCAAAGCCTGGTGCAGCTACTGGTCTTTTTAAATATCCAACTTATGTAC
AAGATATCATGGGGGACATCTTTTCAATGGGATTTGGTCCTTTCAGATGGGTCTGTTCGA
GCGGAGATGAAAAGGATTTGGAAGAAACTGATAAAATCGCTGCATGCGTCATTAAGGAGC
TGGCTGCAGAGAGATGTCAGATGTGTGTCGGCAGTATAATG
>cap3_Contig254
GTAAAGTAGACATTCAGACTAGAATTTATTGCGGCGTGCGTTTTTATTCATCATGGTGAA
CAAGAATTAGNAAACCCCCCAGAGCGACCGACTTATCCTGGGTTGGTAAAGCCATATACC
GATGAAAACGATTACGTGAACCAACCTAAGTTCATTACCAAAAAAATTTCGAAAACTGTT
GTAGCAGAATGCATAAATCATGATCCATTTTCTATATACGATGATGATAGCTCACATGAT
CATTATTTTTTTGTCCTGCTGGAAAGTTAGGATCAGAAAGTAAGAAAACAGACATTAATC
CTCTTGAGAAGTGCACTAGTAGAGATATAAGGTGTAAATGTAAAAATTGGGATCAAGGTA
ACATGACAACTGATCTTATTAATGAACCTATCTCAAGTAAAAACATCTCACCATTATCAC
AACGTTGTCAATGTTGTAAAACTTTGACACAACACACTCGGCTTTTACATCATAACCATC
ATCAGAAGAAAAATATAAGTCACAGTAAAATAATTTGATTAATACAAAGAAAATCAAAAG
ATCTTACATTAGTGGGGAATATTGTTCTTTATCAGCTGATGCAATTGGTCCGAAGTACCC
TGGCATTCTACGCACTC
>cap3_Contig255
GGCATTTTAATGTGATTGCACTACTGAAGTTTTTGATGCATAAAGCTCAGCCACCCACAT
TCACATTTTTGTTTGAAATTTTTATAGGGAATGTCTCGTCAAATAACGTTCAAACCACCG
AAGGTTTTACCCTACTTTCGTTCAAGCCAAACTTTATATGAGAAATTTGTTATCAAAAAG
TGGGTTGAGGATTCAAACCATTATGCCACACGCCAAAAGTTTATAGAGACAACTAACTCG
CAGTGGAGTTCAATGAATGAAGAACAAAAACAGTCTTATCTAAGTACTATTCCTAGAGAG
CAGGATAAGAAGCATTCTTTAAAATCCTATTTCCAAACCGTACCTAAGTCTGAAACTACA
ACTGCTACGTCATCCTCACCCTTTAGTTCAAAACCCAAAAAATTAATGTTGTACCAGCCA
AAGTTCTTCCTAATGCTGCTTCAGTGATAACTAATCAGGTTACTGATAGGGGAAAAAGAG
TTTTGTTGCTCGACAATATG
>cap3_Contig256
CTCACAGTACAATTTCTAAATCTGGATTTTGTGCAAAATCACCATCTTGCAATCTGGAAG
AGCACTCTTCTTGCCATTCATTCCATTTCGAATTAAAGTCACTAGCAGACTGACCTTGCT
TCACCTGAAACAATGGCATTTTCTTTAGCAGTTCTTCAATATTAGCAAACACGTCAAAGG
TACTTCGGTCTCTGTGAGGATGGTGTGTGAGAAGATCACAAACTTCATCTAAACGTCCTT
GCAAAACGAAACCGTAGATAGTGGACCAGTAATCTGAATGTGAATATGGATCTTCACATG
CCATCACAGCCTGTCCCAACTTGTCTGCATCTGTGAAATGGATTTTTATCCAACTTAGCA
ACTGCTTCAAGCAATAGCCACCTGATTGTGATTCTATAAGTAAGACTTCGCATAAATGCC
AGATAAGTTCCATGATACTGAATAAATCCAACTCATTTTTTATATCCTCATCAAGACTTT
TACTTCTGTCATTCATCACTGTCTCTTGAAGTTTCATGATGCATGATCCAAGTACAGCAC
GGTAGTGTAAACTCACAGAAAGTAATGAATCTCTATCAGGTGTCTCGTCATCGCATAGTT
CTTGAAGATCCATAAATATACCATGAGTCTCGTTTAATAACTTTCTTGTACCACTACTTT
GTAGATCGACCTCCCATTTGAGTTCTTTTAATGAAAGTGCTTCTGCAGTAACACCTACAC
TATCAGCATCATGTTGTGGACACACCAACAAAGAGTTGAC
>cap3_Contig257
TTCTTAGATGGTTCAGTCCTTGATTGATCCTTACGATGTTTTGATTCTGTTGGATTTAAT
TTTCCTAAATTATTAGATGAATTTGGTTTATTTTGCCTAGTAAGTGACATAGTGTTGGTA
GTAGTGGGAGCAGTATGATCGATGTCAGTGGGGGAATCATCAGAACTTGAATTCCCACCT
AACAATTTTTGCTTCTTAAGAATAATGTCATCTTCTTCATCAGTTCTATCAGGCTCAATA
TCTGAGATTTCAAGAACTGGCCTCTTGAGCTCTTCGTGTAATCGGTCCATAAGGCATCTA
AGAAACTCTTGAGTGTCTTGCTGTGCATATCCACGAAATGTTGAGTTATGTATTCGAATT
GCTCTTAAAAGAGCACATGGTGTAAGATGTTTCGGTCTTCTTTTGTCCCATAAATCAATA
AGCAGATTACGATAACATTTACCAACAGTCATGCGACCATCTTCAGGGAATTTGAGAATA
TTTTTGCACATTAAAAAATATGTTGTCAGCTGTGAGCAATTTGATAGAGCTTGTAGAGCT
GAGTTCATGTAAC
>cap3_Contig258
GTTGCATTTACTTTTAAACTTTCCTCAGTGGCAGTAGTTGTATCTTTTGGAGGAACACAG
CGCTCAAGTTTGACAATAACATACAAACTTTTCTTGTTTATCAGCTCAGGAACAATGATA
GTAAATTGACCTGATAACTTATTGTCCATAACAACACTTGAGAACAAGATTGGTCCACAG
ATTAATCTCTCATTGTTGACAGCGTCACTTGTATCTGAACCTTGTGAGTTGACCTTTCTT
GACTCATCAATGTAAAATGAACATGAAAAGTCGTCGTTTTCTTTTAGAGGAGTTTTCAGG
TTGACAAGTATATCGAAATATCCAACAGATGTTTGAACGAGGACAAACATTCGGAATGTA
AAATCAGCTTTGCTTAGTTCAATGTCTAACTGCTCAGTCCTCTTCATCAATCTTTTATCC
ATTTCAACAGGTGACAAACGAAGCATGTGGTTCGGTACGGGAGAGGCTTGTGAAGCCTTG
TTCCCTCCAGTTCGTGTCACATACCAGTTGACAGGAAAGAATATGTAACATCCTTGAGTA
ACAGGTTCAAACTTGATCAAATTTGATAAGAGTTTCAACTCGGTTTGTGAAAATCTTGAA
TTCCATTGGGAAACTGACATATTTGAGGTTTCATCTAGTGTCATCTCGAACGGTTGATCT
TGATTAGTGAGACATGGGCAAACCCTTAAATGTCCCAAATTGTCACATATGGCAACAGAT
GACAATGTACTGCAGTACGTCAGTTTGTGTATGGAACGTCCTAGGTCGAATTACTTGGTC
TATTTCTAGTTCTAATTAG
>cap3_Contig259
GTGCATTACATTCCGTTTAAACGAGATTTGAGTGATATTGAGGAACGTCTGCTTTGGGCC
AAAGCGAATGACGAGAAAGCACGAAATATAGCTTTAGCTGGTCAGCGGTATGCACGTGAT
AACTTGACAAGTGAGAGGTTGTATTGTTATACGTTACGCGTGTTCCAAGAGTATGCAAAG
AGGCAGGAACAAACACCTAAAATACATGAAGGTATGGAACACGTGAAACAAGATGATGGT
CCCGATTCGAATTGCAAATGTCTTAGAATGAGTGGAAAGGCAAATGAACATGGAGAATTG
TAAAAGGATTGCGTCATCGTGAGTCTCATTGCTCATATTCTAATATATAAGTTGTTCTAC
TTCAATTTCAGTTTGGTTTATTATCGACTGTTTCTATGTACTTTGATAGATTTTTTAATG
AATGAATTTTAACAATTAATATTGATTGTTAATTGCGCGTAATATGTTTTTACATTAGTG
ATATTACTTGTTCAATGTGGATGTAGTCT
>cap3_Contig260
GCAGTATCTATTTAAATTGAAAGACGGATGTGATGGAGCTGGACAACAAGATATATGGAA
GAGTAAATCTATGAAAAATGCGAAGGGAAATATGTTTCAATATGGAATACCCCCATTATC
TATGACAGAAAATGCTATTAAAATATGGCAAAATAAATCTCCAAATTCACCTGAAACATT
AAGTGTGATTTATATGATAAGAGAGAAGGAATCAGATGAAGAGATGATTAATTTTGTATT
GGTGAAACAGATAGCTGCAGAAATGAACTTTGTAAAGAAGGATTTGATGCTATCATAGAT
GGTATTTCTGTGCATGTTGATGTTGAAATTATGGACACAATGAAAGATATGAAGTTGAAG
CGTTCGATATCAGGGTTGGGTGGAGCACCATGTATATTGTGCAAACGAGGGTTGAAGACT
AGAGTAACATTAAAATATATACAAAG
>cap3_Contig261
GGATTCTTTACATCAACTCTACAATTATTATATTGAAGATATGTCGGTTTTTCATGAAAG
TCACAAATCGAATGGGAAGCAAGCGAGCGTGAGCTAGTGGTTGGTCGAATCACGACAATT
CCAACGAGAACACGTGGTCAAATCACGACAATTCCACCGAGAACACGTGGTCAAATCAAG
ACAATTCCAACGAGAACACAGACTGACACCCTCGTATCAACAGCTTACACATGTTCGTTT
TCATTTCTTCGTTCTTACCAAAACTCAACGAATGATTCTCATTGGCTACCCAATGCATGG
TCACCGTACACGCCATGCTCGACAGCACATCATCCATGAGCTCCTTCTGGCACATCTCAT
CCTTTGTCCCGTTCATAATAAACACGGGACAGTGAGGCCGAGTAAATGCGAAGTCCGTAA
CTCGTTCAGTTTACCCGCCGCGTGGAGCGGATACGATATACACGCGACACCATATATACA
GCTATCGCCCGTTTTATTCGACGCGACC
>cap3_Contig262
GAANCTTTAAATAGCTGCTTCAAGTTACCAATAAGTGAAAATAGATTTACCACACTCACA
GAAAACGGTTTCTCACCAGTATGAGTTATTGAATGTCTTTTAAAGGATTGTTTAGTGGGA
AATTCTTTGTTGCAAATCTTACATATCTTGCTTTCCTCTTCTGCACTCCATTTTCCTTCA
CTGTGTTGCTTAAAATGTGTTTTCAAATGAGCGAATTGTGCAAAACTTTTACTGCATATT
CCACAGCAAAATGGCTTTTCACCCGAATGAATCTTCATATGTCTTTTTAAAGAATCTTTA
CTGGAAAGCTCTTTATCACATAGCTGACAGCTTACTTTTTTTTTCTTGCTATTCAATTCA
CCATTAGTATTAAAGTGAATCTTTACATGATGTTTCATTGTAGATAAATATGGAAACCTT
TTACCACAGACCTCACACGAAAATGGTTTTTCGCCAGTGTGAGTCCTTGAATGTCTTTGT
AAGGAAGCTTTACTGGCAAGCTCTCTGTTACATACCTCACAAATGAATTGTTTTTCCTGT
GCTGTGTATTCGGTTCTTCTCAG
>cap3_Contig263
GTGTTGTTGGCGCGATCGTTTTCCAATATCTTTTGAACGAGATATTTTGCAGCATCGTCT
ATATTTATGTTTTCTTTAGCACTTGTTTCGTACCATCCTATAAACCCTTTTTCTGTACAA
TATTTATCCATCTCCGATGCGAAATTGACGAGACCCTCTTTGGGCTGATCACACTTATTG
GCGAGTAGAACGCAGGGTACGGGCTGCCCATCCGGAAGCTGGACTTTGCTGTCCAGATCG
TGTTTCCATTTGGCGACGGCGTCAAACGTCGACTGTCGGGTGACGTCAAACGCGATCATA
CATCCGACAGCTTCTTTGTAATACACCTGAAATTGCATTGAGAAATAAAGATATGGTGAA
CACTTATTGATCCAACGCGTACTGGATGGGGGACGCGGATGGTAGAAGCGAATGTCATTA
AAAATGATTCGATAAAATGCACTCAACTCGCAATGCCGACGGGTCGACCCATGTCATGTG
AGGGAAACTGGGTAGTCAGTCTGTAGCCTACGAAACACAAGATGTAACTTAAGCCATTGC
CTCAATAAGCACGTAAAGCTATACTGTTCCAGTATAAGTGACAAACTGTTAACCATTGTG
ATGGAACAGA
>cap3_Contig264
GGTTGCAGTGGTTTGATACATAACGATTTCGCATTTGTATGAAGAACAGCATCAGAGTTT
GGACTCCATGCCGCTGAATAGATGGGAACAGCTAATGATACTAAAGTTGACCGCAGCATA
CCACTCCTTGACCATATTTTCACTTGGCCGTCCTCTCCAGCTGTCAAAAATGCATTCCCA
TCATATCCCATCTTCCACAAAGTATTGCTCCTCGGTGACCTT
>cap3_Contig265
ACAAACCCTAACGTACCTGCGAAGAACAATATATTAGTAAAACCGGTCGCTGCAAAAGTA
GCACCTCCTCCAACTGCACCTAGTGCAGCCTTAAACCTTATGGCTGGAAAGGCGGCAGCC
AAAAAAATCAAAGCCAATTTAAAAGTAAAAACCGAACAGAAGGCATTTGCTGCTAAGCCC
GTTGCTGCTAAGCCCGTTGCTACTAAGCCCGTGCCGGCGCCTACGAAGAAAAAAGCGAGG
AACAAGACGAAGATGATTGTTCGGCAAAACCTTGTCAAAAACCTTTGGCGAGGAAGTTGA
ATGGGTTCAGTGTGACAAGTGCGAAAATTGGTACCACATTATATGTGTTGGAATTTCTTC
AGAGGAAGCTTCTGCAGTTGACGAGTATATATGTCCCGATTGTAAACCTGTTACGAAAAA
CTAAGGAGACATCACGGCTGCTGCATAATCGTTATCCTTTAGTATCT
>cap3_Contig266
ATCCAGGACAAATGTTAAAGTAATAAAATTTCATTAAAATCAAAATTACAACTTCATAAA
TAATAATACTAACTTATTTTGTTATTAGCTAAATTTCTCAAGCCTAAGTGTTATTCCTGC
AAAATATTATCACTTACATTAATTCTACTATACAACTTAGACTAAAAAACATTATTGTAA
AAAAAACGTATATTACATATTAACAGTAATTGATGTGGTGTGAATTTCCAATTAAGCTTC
TGCTGAGGTACTAGTTGATCTATAACTAATGTAATGTAATTTTTTCTAGACATTGTATTA
TCATTGCTTGCTAGAATATCCTCCATAAAATTGTTACATGAAGAAACCATTGCATCCATG
AGACAAGCTTGTTTAGAAATGATTTGATTTGTCTTGTACCTTCTTCATCGTCATACTCGA
TTGAGAAATCGCTCTATCTTATTACCATCTTCATCTCTATCGTATTCATCAAGTTTCCAA
CAAAATTTCACGATAT
>cap3_Contig267
CGAGCGAGTCATGCCGTTGGTTGGACGAACATTATTTCAATCTTCAAGATGGTTGGTACT
GGACTAAAGTAGGAGGGCAACCCATGTATAGTCAGTGCAGGATGAGTAGAACAGGTATTC
CGCCTATGAGATGCTCGAACAGACCATGTCACGTTGATGCATCTTGTGAAGACACTGAAA
CAGGAGCAAAATGCACATGCAACTGCGGCTATTCCGGCAACGGACGTGAATGCCGAAAGT
CCTTCCAACCGTTAAAAATGAGAAATGGGACGATGCTAGTAGCGGAAGCGTGTGGACTTA
GAAGTGGTAATCTGCTCACCACTTTCAAAGGGAAACATCTAGAATATTTAGTGCAGTTCG
AGATTTTTCCGTTAGTCTTTGAACGAGGAGCTTATACCATCGTTCATTTGACGACAGGAG
GTGATTGTTGTGGTGTCGGGCAAAGAATTCCGGCTGTTTGGATGATCGGTAATGCACTTT
ATGTATGTTCGGCAATTGATAACAGCGGGACTTTCTGTAAACATGGCCTTGATACAAAAG
TCGTTCTTCGTAGGTGGAGCAAAGTGATAATCCGACAACAGAAAGATGCGACTAATCGGT
ACATTTACTCTATCACCATCAATGGACGCCAGGTTATGAGTGTAGTGAATAATAGCCCAC
GTGTTTTTACATATATTGAAGTATACGTGGGTGACAGGTGGTACCCTGCTCAGAAGGATA
TATTCGGAACTTGTACGTTGAGGGGTATGAGTAAC
>cap3_Contig268
AAAGATTTGGCTTATCTAGTCCCAGTTGATGGAGATTTTGATGATATGGAGGACGAAGAG
TTTGAGGAGAAACCATTATTGAGCACATCTGCACACGAGAAGATGAATAAAGAACCATCT
GTAAAAATACGCTCTCATAATGATGTACAAAAGGCGAAATTGTTGAATACAGACTCTCAA
AATAATATCATAAAGGTGCCTGAATCGAATGGTGTGTCTAACCAAGGCTTTATTTCAGAA
GGACCGTTACTAAACCAAGCTAGTCAAAATCATGTTCTACAGGAACCCTTCTCGAACCTT
ATCAACGAGGAGTGCATGTTAGATGGTGATCCGCTGTTGGATTTGTCGAATCAAAATGAC
GTGCTTGAAACTCCAACTTATAACGTCGTAACGTACAAGAGCCGTTGGTTGATCCTGTTC
ATATTTTCAATGAACACTATGATGAACGGTCTACTCTTCATGTCTTTATCGCCGATCAAC
AACATAGCATGTAACTATTATCGCGT
>cap3_Contig269
GAGAACGATGGGCTCCAATGAGGACTTATCGTCAATATCTTCGTCCTACTCAAGTATATA
TACCCCACCTCCACTAACGCAGGTTCAAGTATACCAGCTGCTGAGTGAAGAACTCGGATC
GCTTGTGAAAGTAACGAATGACCAAGATGCGGAATTAGCAAGAATGAAACTCGAATTGCA
AGAAACTCGTAGCTTTCTGACGAAAACCGAGCACGAACTCGCCACGTCACGTGACTCCCT
ACATACGCAACAAAAAGAAAGCGAGAGACATTTACGCAATGAGCGAGAAAATTACGCAAA
ACTTTCACGGGAATTTAAACGAAATAAAGAAAAAAATCAAAAACTAGCGGAGCAGCAACG
TCATCTTAAGACAAATCCCGAAGAGTTTGTTTGATATTAACTTTTCCCCCTGATACGAGA
TGATGAAGAATTAATATTATCGCGAAATTTAAGTAAATAAGAAATTTATAAAAAAATGTG
CTGCGTGTTTTTTGTTGTTGGTGGAGCTCTTTTAAAAAAATATCGTCTAACA
>cap3_Contig270
CGTTTATTTGTCTGTAGATTCGGCCGTTGAAGATGAAGTAGGTGTTATTAACATAGATTC
TCAACAGTTGTATGATATGTTTGACGGTCATTTTGGTTCTTTCTTTCAGTTTCTAATCCT
TTTCCAGTTCTTCTTTAATTATCCTAATTGCTTCTTCTTGAGGGACGCTTGGGTATAGCG
CAGTGACGTCGTATGAGACTAAGGTTTCATCTTCTTCTAGTTTGATGTCTTTAACTGTTT
CTATGAAGTGTTGGGAATTCTTTACGACGTATTCAGTGTTTCCACGGAGGGGTTTTATGA
TTTTGGCTATATGTTTGTCGACTTCCTTGTAGACGCTTCCACTGCTGTCAACTATTTCTC
GAAGTGGGTTCCCTTCTTTGTGTATCTTCGGTTGACCTTTCATTCTGGGTATTTGTGTCT
TTGATGGATATAGCTTCATGTATGTTGGATAGCTGATCTCTTCTGCCTCATGTATCTCTT
TGTAGTTTAGTAGTCCAGTTCTTTTTTGTATATCATCTGTTGGTATCTTCCTTGTATTTC
TCT
>cap3_Contig271
AACAAAACAGGTACCGATGGTACCGGCAGTAACGGCAAAGACGTTTTCAGCTGGCAAAGA
GCTATATGTCTTTTTAAATTTGTAGTATGGAAAACGTCACATCCCAGTAGCAGAAAGTGT
GCGATACTGCGATGGTGATCGCGGTAAGTAAAGAAAAATCTCAAGATCTCACGGAATGAA
TAGAGCACTATCAAAAAGTATTTTACCTTTTTGAGCGTATAGAAGAAATCGCTTTTTGAT
ACTTCTAGTGACTTCTGATACTTCTGAACAAACAATTAACTCGTATCATACCGACCTATA
TATTTCACGGAAAGAACGACAATAAAACATCCTCATCGCAGCTACTTCAAACATTTTCTG
CTTCTGGGCTCACAGATCCATCAAGTTGGCGTAACACACTAAGAACTAATAATAATTGAA
CTATGAAACCAACTACCAACCCAAACCACATTAAAGCGCCAGAAATTTCATCCGAAGGCA
GATACCTGCGGTGTCCCGCAGCGAAAACTTTTCGGAGCCCTTCCCTGTTTCTCATTA
>cap3_Contig272
TTCGAAGCTGCCCCTGGAGAATCTGGCGGAGCTGCTGGAGCTGTATACGCCGGGCGCGAG
TATCATAACTGAGGGCGTCTTGCGGCAATGCTCAGACGGAGAACTGATACTGGCGCACGG
GCTGATGGAGCTTTTGGTCGACGAGGCCAATAGGCAGTTCATCCGCGTTACCACGGAGAA
AAACAACCGAGCCAGCGACGTCGCACACAGGAGACAGTACGCTGAAACCGTTTACCAGAT
GCAGGTTTAAATTGATGATTCGGGCGGCTTTTTTTTCNCTCTCCTTATTAGTTTTCCGAT
GTCGGATCCACTGACCCCGTTAATACAGTCCTTTAATTGGTTTATTATTATTACTTAATA
ATAATAAATTAATATTGCCAATTGAATTTAAATTATTTGGAATAAAGTATGAATATTAAG
ATAGACTTGTAATCTAATGTTAGAAAGTTTCAATATTATGTATTATTAA
>cap3_Contig273
GTTTTGATGCAGATGTTTAGCCACATCTGAAGTTTCTAAATAATGTTTAGTCCATTTTCT
TGTAATCTTTCCTGGTTTTGCTCTCTAATCTTTCATTTCTTCTTCAACCTTTCTCTTCTC
ATATTATAACTCAGTGATGTGACTTCTTCTTGGTGAGGGAGTGGCAGGTTTTGAAGTCTT
CCTTGGAGGCTTAATACTGAAATGGATGACCTTGTCTAATTAGTTCAAGTTCCCCAAAGT
TCTGAAGTGGCATGAACCTGAATTTGATCATGTGGATAAGAAGGTTAACATTAAATTTTT
GGTTAGTTCACGTTTGACTAATATGTTAATATTGCTCTTAGCTAGTTTATAATTACAAAT
AATAGACCTTATCTTAAATTAATTTAATCGTTACAGTTATGTTGATTTCTTAGAAAATAT
ATTCGATATT
>cap3_Contig274
GTTAAAGTACAGGTAGTTCCAGATAATGACCGAAAGTTCTTCACCAAGACAAAAGGCGGT
GAGAATCCCGTTTTCGATGAAGAGTTTTCGTTCCCCGTTTCCAGTGACGATTTAAATGAG
AAATCCTTACATTTATCTGTGTGTGATTTCGATAAGTTTTCAAGGCAGAATATTCTTGCA
AATGGTGTTGCCAAATTGTCGGAGTATGTCGACAAAATGATGTCAGCAGAAGGGACGGGT
GAGCTGTCCGTGGATTTGACAGAATCAGACGAACTCAGAACGCTTGATAAAGGTGAAATC
GCGTTTTCGTATGCTACCTTCCCACGTGTCATCGACTCACATTGACGATCAACAAAGCGA
AAGGACTGAATATCAACATTGATGACGACACACGTTTATGTGTCAAAGTACGTCTCCTCT
TCGAAGGTAAAGTATTAAAGAGCCGACGAACAGCTTACCATCAATCAAACATCTCGAATC
CAATCTTCAACGAGTCCTGGGTCTTCGAAGTCCCGACCGAACAACTGCAAGTAACGAGCT
TCGTTCTCTCCGTCTACGCATACAGTCACAACAAAAAACGGGTTAATCGGGATGGCGTCA
ACAGGTCCGAACGTGAAATCGAGAACCGGATTAGCACAATGGAACGAAATGGGCAGAGAT
CCCCATCTGCATTGGCATAAACTTGAATGATTCCCTTTTTTATTAATGTAAAATGCAACT
AATATAAAAAAAGCTCATAGATAATTTTAAAAGAATGAAGATTGTATAAGAACAACTCAA
AAAATAGCTTTTGACGCTTAAGATATTTGTCTATAC
>cap3_Contig275
GTCGAGCTCATAAGAGCAATATAATCTCGGAATGCAATAGTGCGAATATATGCGATTCGC
CTTATATGTAGTTATGCAGGTGTGAGTACAGTTTCATGCACACAAATGCGAATATTAAAT
TAATTTCGTACGTACGTTGTGTTAGGTTAAGCGCGTGACATGAAATTAACACGTTCAAAA
AAGACTTTTATGCTGAGCGGGACGACACAAGGATTGGATGGTTGGTTATATGATAGAGAC
TGGACTGTGTTATGCGTATAGATCTAAATATCAAATTGATTTTGTTCGTTCGGTTAAGCG
CGTGACACTAATAGTTAAATACAAAATTAACCCGTTTGGTTGGTTAAATGGTAGATACTG
AGCTTGGACTTGTCTAAAAAATTCAATATTTAGATTTGTAAAGGAAGAAGCCTTGATTAA
TACGAGTTACAATACGAAATTGACCCGTTTGGAAAGAAGTCTTGATTAATACGAGTTACA
ATACGAAATTGACCCGTTTGAAAGAAG
>cap3_Contig276
AGTTGCTCAAGATAATAGCACCGTGACAGGTTATAAAGAACAGAAATCATTATTGGAATC
GAAATGTGTCGCTTATGAGAGCGAGATCAAAGACTTGCATGAGAAGTGCGCCCATCTGGA
GAAAGCAAGTTCAAATGACGCGCATAACGTCATTAATGACACGGTTCTTGTGAAAAATCG
GATCATAGGTGATATGAAAGTAAAAGCTGAATCTTATGAAAGTGAATTAAATCGTCTTCA
ACAGGAAGTGAACAACCTGTTGGAACTGAACGAAGAATACAAGAATATTAAACACGTTCT
TGAATCGAAATGCGAATCTTTTCAGAAAGAAATCGAATCGTTGAAAGAGAATCATCCCAA
CTATGAACAACACCAGAAAGTGAATGACATCGTCAAAGCGTGTCAGGAGCTTGATAAGAA
ATGTAAAGAATTGCAATTAGCCAATCAGAAGCTGCTTGAGGATTATAGCGGTTTAGAAGG
CGCAAAGCAC
>cap3_Contig277
CATCTAAATTTTAAGTAGTGTTGATAGTGCCTGTGTTTTCCATAATGCCAGTACAAGATT
TGCAGATGGATATCGTTTCGGATTAGGCGCTGAAGTTGGAATAAGTACCACTCGTATACA
TGCACGTGGACCAGTTGGTGTTGAAGGTTTGCTCACAACCAAATGGGTCTTAAAAGGTAA
TGGACAAACAGTGTCTGATTTTAGCGATAAAGGTAATCTGAAATATGTACACAAATCGTT
AGAAATTGATAATAATGAGTTTATTGATGCTTATAAATTATAAATTTGGTATTGGTAGTA
CTTATTTATATTTAGTTTCTTGTCGCTTGTCATACATGACATAGTCATGTTTTTAACATG
TTTATTTTGACATTTTTTGTCTAATTTATTTATAAAACTATATAAACCAAACTGTATTAA
ACTAGTTATATTTATATAAAAGATAAAACTCAAGTCATACCACCAGTTTTTGACTCTAGA
ATTGTTTTAAGAAATTATTACTGTGGGC
>cap3_Contig278
CCGACAGTGATCCAGGTGCGATAACGAATTCATTGGCGAGTAGTATCAGCAGTCAAGAGA
GCGATATTCTTCGCAGCACTCACATTCCTAATATCAATAAATCGTTACACATCAAAATGT
CGAATCGAAAGAAATCGCGTTCGGAGAACGAAGACAGTGCATCTGATCGTGATCGTTCCA
ACAGCGTTATATCCGATAACAGCTCGCAAGGTGTTTCCAGGTTGAGAATGGGTAAACGAA
ATCGAGGTAACTCTTTGTTATCGTTAGGTGTAAGTCCGAAGAGTTTCCAACATTTCCCTT
CGATGCCGTCCGATTCGCCCTCGTCGTACAGCCGGGAAGGATACGGCTACACAACATGGC
AATCCTTACGTAAACATCGTTCTTTCAAGAAAGAGATGGACCTTATACGTGGTGGTGGCT
CAATGGCTGATCGCAAACGATTTAGTAAGAATTTAGGTTATCAGTACCGAAGACTACTTG
ACACTCATCGCAAGGGAAGTTCTAATTATATTCTAAT
>cap3_Contig279
TGTTTTTAGCTTGCAATCAGGATTAAGATGAAGTTTTTGGATTTGCTGCTGTATTGATCC
TGTGCATCTCACACATAACGTTTGGGGATGCATTGAACAGTTTAGATTCGGAGGATTTTG
GTCTAGTGAATGAAGAGAACGGTTTGTGGGAAATTTTCGAGGAATTAAAGCAATTGATTA
AAGACTTTCTGGATTCTGATTTTTTCGAAAGATCGTTGAATTTCTTGGAAGATTTTTCGA
CACAATAAAAGCCGATCTAAGAAAAGTTTTCGCCAAATGGTTGCCGAAAATTGTTGAGCA
ATTCACAAAACTACCGAAAGTTGTCGCGAGAGGGAACTTCTGGTATGCCGTTAGAAACTT
GATCGAAAAGTTATATTACAAAATCCACGACATTCCAGAAAATCTTTTCTGGGAAATTGT
ACAAACTCTTGATCATAA
>cap3_Contig280
GTAAAATGTCCTTTTGAAAATTGTTCAAATACCTCATTTGGTAAATTTTTCATGTCTTGT
ACGAAACCTGAACACCACTTGAGATAATGTGGGTGATCAAGAGCTGCAAGCCATCGGAGC
ATTTCATTTAATGTTTTTTGAAAAAAGACCATAGTCTGAATCTCGTAAACTCTTGATAAA
CAAAAAGCAGACTTTCCATAGTCATCGTTGAAAACCAAAATTTAGCAGTAGGCGTTTTGG
TCTCCAAATCAAGTTTCTATGACTTAAAATCATCAAATTCACTCTGCTCATTAAAGGCTT
ATTTGCTAAAGTAATGAGTGCAGATAAAGTAACTTGATGGACATAACGAGATCGTTTAAA
TACCAGATTTACCGGAGCAAAGTGAAGAAGGTATCTGGGTTTTACCTGGAGTAGTTATCT
TTGAATTTACATACTAATTCTGTCCAACCACTCCC
>cap3_Contig281
GTGAATGTGAAAAAACACTCCCTGGATGTTAAAAACTGTCGAAAGTCATGTAAAAATGCG
CAATGTGATCGGGATGTTATCAAACCCCCAGGCACATGTAACGAACCTTTTGGTATTTCA
ATCGGTCCCGATGGTACTCATAAGATACCTGATGCAGCTATGACAGCATCCACTACGTTC
GCACCAGGAGGTCAATGGAAGGCGTCAGCAGAAAATGCTCGTCTGTATTTTGAAGATGAT
TTCGATAACTTCAGAATTGGAGCTTGGTGTGCTGGAGGTAAAGATCCTGATAACCAGTAC
GTTGATGTGGATTTGGGACAGGTCAGGACAGTCGCGTATATTGCAACACAAGGGCGCGAT
CAATACTTCGAAAGAGTAGCCAAATTCAAGATAGCTTATAGCAACGACGGTAAAAACCTA
CACAACCCTTTAAGGAAAATAGGCGGAGGAAGACTGTTCTTTGGAAATTGTGATACACGT
AAACTCCTGTCCTGAACAAGTTCGAAGG
>cap3_Contig282
ACCTGATGATTTACTGATACAGAATTTGAGCAAGGTTTTATGTTGCCATTTCTTGGAGAA
TCCCGGAAGAAAAGTCTGCGTGTGGTGGCAACGGTTTTGTACCTGGATGGTGGAAAATCT
AGGCCCGTCTTTCATTTTCACACTTTCGGGAAGTGTCGGATCGGGTGGGATCAAACTCCG
TGGAGAGGCCGAAGGCCATGCAGTACTGAAAAAAGATGAAGGGAAGAGTGAACTGGCATT
TACTCGATTAGCACTTGCGATTGAAGTACCGTCGATTAGTATCGAAGCAGAATTGCAGTA
TAAAGATAAGACGCTTGGAGCTTGGGATAGACCTCTTATCTTTACTGGGGTCATCGAAGC
TTCACTGACCGAAGTGAGCTTGACTTTCTCGATGGAGAACTTTATTTATCCAACACCCAT
CACTGAATACATTGCCATTGGTAACATACTGCTTGGTATTGGCTATACGTTTGGAGCACC
ACTACCGTCCTTGTCATTTGGAGCTGCTTTAAAACTCGGTAAACTCG
>cap3_Contig283
GTGCTTTTAATTTTATAGATAATCTTATTGATAAAAGCAAAGGTTTAGACAGTCATGACA
AAATGATTTCTAGATTTTAGAATGATTTCAAAAAAAAACCAAGGGTGAGTGACAAAAACT
TTTTGTCATAGTTTTCATGGCAAAAGTAGAGGTGATAGGGTATATGTCAGTGATAGCTTT
ATCTATGGTGTCTCTGGTATAAAATATACTTACTATCCACAAGCTTATACATACTAAGTG
ATGCCTTTCTTTATTGATTCATCACAAGAAAAAGGTCCAGGATATTGGAAACTTAATACA
AGTATCTTAAATGACACAGCATATGTAAAAATTAATCACTGATAGTATCTTACAACTCAA
AAACTATCCTAGCCAGAATCCTTCTTAGTGGTAGGAACTCCTTCTCCTCACAGTTAGAAG
TCTGTCTATCAGTTATTGCCAAAGGAAAAATATTTGGATAAAGAAGTGAAAAATGTCTGG
ACAAGGGAGTTAGTGGAGTTGGAGGCAATACCAGTACTGTCCTTAACACCAACCAAACAT
T
>cap3_Contig284
GTTCATATAAAAATTGTTCTAACGAAAAACTAAGCAAAAAGAAACGAAAAAAATGATGAT
GTAAATGATAAAAATATTCGCTCTACAATATGAATTAAATGCATTGTATGTAAAATTTGG
AAAAATGATATTAAACGATGATAAAGCAAAAATATAATTGAAAAAGAAAAACAAAAAGTA
GAATGCTGATAAAAAGAGGACAAAAACGAATCTAAATACATTTGCACGCCTTTTCTTTCA
CGGACATTTTCCTTGCTTCATTGAAGATTGTTGTTAATTTGAATATCAATCGAATGCAAC
TCTTAACGGACGAGCTTTGATCTTGGTTAACTCTAAATGATCTCTCGTTTAACGATAAGC
GACCGACGGCCATAAAGACCGTCAAATTTTCTCGTCAAATCTGCTGCGTCGGGANAATTT
TTTTACGACGTCGGTTTTTCCGTACTATCGGGAACATCGATATCTTCGAACGAAG
>cap3_Contig285
AAGATCAAGCTTTCTCTAAATTACATCACAAAACATCACAAAACATCACAAGAAACATCA
TAAAAAAGTGAAGATTTCTCTAAAATTGCATCACAAAAAACATCACAAAAAAGGACACAA
AAAATCAAACTTTCTCTCAAGCTCAAAAAGAAGGTGCACAAAAAAGGCAAGTTCTCAATC
AAATTGCACAAAAAAGTACACAAGAAGGTCAAGGTGTCCCTCAAACTTAAGAAGAAGGGA
GGTAAGAAAGGAAAGCTTTCAATTAAGCTTCGAGGAAGCAAAAAAGGAAGAAGATTAAAA
ATCTCCATCAAGAAAAAAAGTAGCAAGAAAGGAGGAAAGGTTTCGATCTCAATCAAGAAG
AAGGGAAAGATCTCGATCAAAAAAGAGGGAAAGATTTC
>cap3_Contig286
GTGACGACAAAATGAGAAGCCTTGAGTCGGGAATCAGTGACGTCAAATCGATTATCATGG
AGAAATATGGGCGACACTATCGCTTAACAGGTGGATCGATGTTGGCAACAAAACGTAATA
AACCTGACCCCATCGTAACGTCAAATGCGTCAGCCCCAACAGTGAACGGCAACGTGTCGG
CAGCACAAGCACAAAACGTGACGCTCTTACCAGAGACAAATGCATCGCTAACATCAAACG
TCACGACTGGAAACGCTACTTCTGCAAAGACGACACTGAACTTACAAAATCCGACTCTGT
CAATGTGACGGCATCGACAAAGTCCGACATTGCAAATGCAAATGACGAAAAAACAACAAC
ACACGGGGAGATATCGTACATTTAGACTCAAAACAGATCAACAACGACACAGTGCAGTTC
GGCGCCCCCCCAGAAAAACCCAAAATACGGTTTAGCTCAAGGTGAAAACAATTACACGAC
TAGAAGGTAATCTGACGACGATTACTGTT
>cap3_Contig287
TTGGTTGCTCTTAACACCACCGGTAAAATTTATACCACTGGCTGTGTCGTGGCTGGCAAG
AATTTCGCTAAAGATCATTTATGGAAGATTGGAGGTGCTGCAGTTGGAATCGGTATCGTA
CAATTATTTGGTATCGTTTTTGCCATCTGTTTGTGTAAAGCTATCAGACAAGAAGATAGT
GGTACTTCAGCGTAAACTAATTTGACATTCGAGCTGGGGTTTTTCGTGCACGGATATTTT
TCTGTCCGAAATTCTTTACTTGTGTATATACATGCAAGTTATTTGTCTATTGGAGCATAG
CCGACATTTTTCTGATTTTTGGAGAATTTTTCTTATATGGAAATCAGCATTGTGTCAGCT
TTTTTGTTCCGGATGATGACCGCTGTCACGTGATATCATTTTTTATCAAATTCGATAATT
TTACACAAAGCATGGTTTAACTCAAATGATTCACGCGAGGAAACTATGTACGGCATGAAG
ACAGCAAAAGTCGATAGCAAAAATGCAACAACAATTGCAAAACAATTTAAACTAACCGAT
GTATAGTACTCATAATTGGTTCTTTTGTTAAGTGGGGTNTAAAAAGACATTATATATCAA
GGTCT
>cap3_Contig288
GTCGAGGACAAAATATAAGAAGGATCAAAACTACTCTACTCAACTAAATTCACCTAAAAA
ATAAAATTCTAAATCTCTTGTCTCTTCTCAGCGAAAAAATTTCTTAAAATATAAACTTGT
AAGATTCCCATGAAGACAATTAATGCAGTTTGCCCTAGGGACCAATACGTGACACGTTCA
AATAAGGATTCAGCAATGCTTCTCGCTCTGGCCTCTCGTAATCGGTGATGCGTCTGATAA
TCTATGATGACGTTGAGTGAGTCGTGTACTTGGACAGCAGAAGTTTCCATCATCGTCAAG
GCGACAGATTTATCCCCCATTCCAGGCAACAGACGGTTCTCTTCCTTCCCAACCTCCCAT
TCGAAGTAGACGGTTTTGTGAGAATACGAAGAGAACTCGTTGCTGTAGCAGAGTTCATAT
GCACCAGGATGTTTAGCTGTGAAAGTGTGACTATCATACTGATCAATACATAAAAAAGAT
AAAAAATTAGTTCTGTAATCATTTAGTATTTGAT
>cap3_Contig289
GTCGGTGTCCGGTGGTCGGTGTTCAGTGGTTTTAGCGATTATGGCAATACGGCCTCTTTT
TCAAAGTAATACCAGAAAAGAAAGAACTCTCTCGGACTTCCCTTCAATTTTAACCCGTAT
TAGGCAAACTGCAAACTCGTACACAGTCCCTTCGTAGTGAATTGTGCCAGGGTAAGGGCA
CTGAGGACGAGGTAAGGAGAAAGTGCACGTCACACGTTCGCTATCAGGATTTCGGTGGGT
TCATATACGTTAGCCGCTCGATGAGTTTTTGTAAATGTACTTTCTGATGACGTAATGATT
GCGCCGAATCTTCTCTCGGGTCCGATTGTGACGTCATGGCCTTACATAAATGTGTCGTGT
ACTCATTGGTTGAAAAGTCTTTGTAGAGGTTTTCTGTGTGGTTTATAGAGAGCTCCTTGT
TGCTGTGAGGCTGTGATTCGAGTTTTGCTGCATATGTGTTCAGAGCTGCTTTCGCTTCTT
CTAGCTGCATTTGAAGTTTCACTTTTTCATCTTCGAGTTCTTTTAGACGAGTAATCTCTT
CCTTCTGTGAAAGCATGATAGAATGTCCCCTTGTTTCGGGAATGCTTTGTAGGTCACCAA
TTTTCGTTGGAAGCATTCCCTTCCCTGAATTGCTTCCATACATTGCACTTCCAGCAAAAG
GAAAGTTTACCTGACTTTGTCTCGTGCTGACAAGAATATCCGGACAGGCCGGACGTACTG
ATTTCACTGGATGCTTGTTGGCGGACAGCAGCGAGTGTCTGGCTGGCGTGCGTGAGCTTT
ACCTGGAGGTCGTGTATTTCACGTTGCATCTTCAAAACGCATTTCTTCCATCT
>cap3_Contig290
CTTGAAACGCCAGCCCCCCTCAGAAAAAAATAGTGTCGTCGCCCCTGCATTATCAATCTG
CGAAGTGGTAAATATTAATCTACAGAGTGAACCTTCTGCGTGGTGGAGAATCAGGGTGTT
GGTTTAAGACTTCAAGTTCATACCCATCATCTTCGTCCTCACTGTACAAAATACCTCTCA
AATCTGCCGGCATCGAAAACCGATTTCTTCTTCGATACGCATAACTCCCAACGATACGGT
TACTGATGATCTTGAAGAATATTTTCTTAATAGCACAGTTGAACTCTTTGTTGAAAGCGG
TGTAAAGAAATGGATTCATCGAAGAGTTAAGATGTGGTAAGAAATTAATGAAAATAAAAC
GCAGGGCTGGAAACCATTCCTCTTTACTAATCGTCTCGTAATTAAAATCATTATAGATAA
TAAGTGTAAGTACTACGCAAGGCATCCAGCATAATGCGTAAGCGCTAAAAACAACCATGA
CACAGTAGAGTCTTTTGAATTGCTGCTTTTCGTGGTACTTTTCTTTCAGCACAGTCGAGT
CATTGAGATCGTACAGTGAGATAGCATTGGCATTTAGTCGCGTTTTCTTGTGGAGAGAAG
CATAGATAAACACGATGAGGCATACTGGGATTATAAAGCATAGTATATAAGTCGTAGTGA
AATAATTACGGTTTATGATGACGCAATCGTTGAGCTGTATGTTACGCCTTATACTGAATC
GTGTCGAAAGTTCCATTGGAATATTCCAAGCACACTACCAAACAACTAGAAAATGTACCA
TACGAAAGCAGTACAG
>cap3_Contig291
TTTTACTCGTTTATCTGTTTCTGTTTTCATAATGAATAAGCACACAGAGACAATAGTATA
CAAATTTACTAAAAATTGGATTGCAGTAGGATATGGTGTGCCAGGTAAAATGTGGACTGA
CCTTGGTGGCGAGTTTACTTCTGGTAATGTCAAGGAACTTTCTGAGGCATTCGATTTTGC
AGTTGGTACAGGTGCAGGTTATTCTGCATGGATGAATGGTACTAATGAAAGAAACCATGG
AGTTCTTGACCGTACTTTTGATAAAATTATGTATGAAAATCCTAAATTAAATCCAGAAAT
AGCTCTAGCATGGGCTGTTAATGCAAAGAATGTTTACCTATGAATAATGGCTTCTCAAGT
TACCAATTAGTTTTTGGAAAGAATCCAAATTTGCCAAATATATTAAAATGATAGTCTTCC
TGCGTTGGAGGAGGTGAATACTAGTAAATCAGTTGCAGAACACTTAAAAGCTATGCATGC
TGGAAGAAAAGCATTTGCAGAAGTTCAATGTGATGAACAGACAAGAAGGGCTTTTAGGCA
CAAAGTTAGATCTATAGAAAAAGTATTCGATGCTCACACGAAAGTTTATTTTAAGCGTGA
TGGCCGGGATAAATGGCAAGGTCCAGCTACTGTTATCGGTAATGATGGATCGGTTTATTT
CTCAATTATCAAGGATCTGTTTATCGTGTTCCTGGATGTCGTATAGTAGATATTGAGATG
AATAAAGGTGCTGCATCAGATGATGTTGTAACAGAAAGCACTATAAAAGAAAGAGATCTA
GAATATACTGTTGATGTTGCTACAAAAGATGTTGATAGAGAAAGTGAAGAGGAGAAAATA
AATATTGATCTTGATGTGGAGAGTACATTGCATGACAATGTAAAGCAAAGTACTATTGTT
GTTGCTGATGGAAAAATGATGAAAGGAAGGGCTGTTGAGAAAAG
>cap3_Contig292
GCGGGCACCTTATTTGGTAACCCGAATCCCAGTGGACAATTCAGTTTTTCTTCGAACAAT
AATGGTAATGGTGGAAGTGCACCTAAACCAAACACGTTTGCTCCACCAGCACCAACAGCG
AACTTATTTAGTATTGGTGGCGGTGGTGGAAGTAAAATGACGAATGATGCTACTGGCGGT
GAACGACGTAAAGTGAAGCGAGCACATCGACGACTACCACGCAAATAGGATATACGGTTT
TCAAGCAACTACCCTTCAGTATTTGTCACTGACGCTGACACAGATGACTGTTTTAACTGA
TGACAATAATGAGTTCTTATAAAATTTCTTGTCTATTGTTGTCCTTGTTATGTGTAGCAG
GCAAAAAATAAGTTAGCCTTACAAACCCTATTGCGTTGAATTGACAGGTATATTTTATAA
TTCATCATCCATTGAATGATCTCTGACTGTTAAATACCAGATTTTACAGGGTTTTTGTTT
AATTCTCGTAGACGAAACAACTAATTCTAATGGATAAGATAATTGAATTATTATTTT
>cap3_Contig293
CGATTGGGAAACGAGTGACGAGTATTGGAATAGCACCGAGTTTCTCGCCTGGTTGTACAA
CGAGAGTCCCGTCCGTGACGTGGTCCTCGTGAACGACCGGTGGGGCGTGGGGACGGCGTG
TAAACACGGCGACGTCAAAACATGCGGCATCGATCGTTACAATCCCAAAGAAATGACGAA
ATTCAAATGGGAGAATGCGATGACTATCGATAAACATTCATGGGGCTACCGGAGAAACGC
GAAACTGGAAGATTACTATTCGATGGACGAGTTGATTGGCGAGTTAGCTGAAACGATCAG
TTTAGGCGGGAACATACTAATGAATGTGGGCCCGAATGCGGACGGGTCTATTGCACCAAT
ATTCCAAGAAAGGCTCATCGACATGGGCAAATGGCTGAAAGTGAACGGGGAAGGTATTTA
TGGGACCAAAACATGGCGAGCCCAAAACGACACGTCTGACAGACGAGTGTGGTACACAGC
GAAGGATGAACTCGTATATGCTATTGTTCTCGATTGGCCAGTCTCCCGTATTGTTACGTT
AATTCAACCGGTTCCGACAGCAAAGACAAAAGTGCATTTGCTTGGGCTTGATAATGAATT
GATTTGGGCTCCATTGACTGATAACTGGGGGTTAAAAATTGACGTCACTAATATTGGCCC
TTCTAATCTTCCGTCTGAGCATGCGTGGATATTTCGCTTAAGTGATGTCTCTTAAAACAG
AGGCGTGAAAGCCGGGGCGGGGTGATATGGTAACATGCTATAGT
>cap3_Contig294
GGAATGCCTACCGAATACGTCATGGACTGGAGGGGATACATTTTGCGTCAAAACTTGTGG
ACGGAATATCATCAGTCGTCCAATTATTGAAAACTGTGCAAGTGGACGACGTCGTTCAAA
GACACAAATGTTCTTCCAACCATGGACGGTTGCCATCTTAGAGAATGGTAAACTCATCTG
TAATGGAATGCTGATTGGCTCAGAGTGGGTCCTTACTGCTTCACACTGTGCTGCGCTGTC
AAGAGATCGGTGGTCTGGTAGCCCAGGAAAGAAAACTATTCAGCTAAAGATGGGTGCTTT
GTATTGGTCCAAAACTGATATTGAATCTACACAAATAAGAACTATCAAAAACGTTCGTAT
TCGAGAGAAATTCGATTATGGTATATACGATGACGTAATGCTGATTCAGCTTTCAAGTAA
AGTGAAATTAGACAGATACGTTCAACCTATTTGTATACCTCACGAAAAAAGGCAACAAAG
AAAT
>cap3_Contig295
AGCTTTTGTGATCATCTTTAAGGAGTTGTTGTGTTTGGTACGGAAGAAATAGTAATATTT
CGCAGCACTGTATTCTAGAAGGATATCGATAAAAGTTGATCCTTTCTCGAGAGACAATAG
AATTTCATAGTCTTTTGATGGTCTGATTTTTGTTTTTGCGGAGACAACTTTGAGACAGCG
GGAACCATTTCCGCCGCACACGCCGCATTCGTCAATTTCAAGCTTTGAACCAAATTTGTT
ATCACAGCCAAACTTGACGCATTCACCTTCAATACAGATATTACTGCTCCGGCGTCCACC
GCACTCTGTTCCGTCTGTCACATTAACATTCATTCGGAACTCACTCGCGTCACGTGTTCG
GCACGAGATCTTACAACTCCCACGTGTTGTTGGTTTCTTAGAAGGTGAACAGAAGCCCGT
CACAGCTGTTATATCATCAACAGCAATATCACTGGCCCAATGTTGTCCACGTTCAGCTTC
AAGAATTAACCTATAACTATCAACTGATTCGACAC
>cap3_Contig296
GTTTTCATTGAAGATAGCGAGTTATGTGTGGACCGAGCATTTGCTGAGAATACCAACTGC
TTTATACGCCCGCAGATATTGAGAAGAGCAAGATCGTTCAACTACCGATGGACGTAGAAA
ACAAAAACCAAAGAGGTGCTTTCTCAAGATATTACATTTTGAATGGTGCTGAAGTAAGGA
AAGGCATCAAAGAAGGATTTGGTAAAAAGAAGACTTTTGACTGTTTTGAAGAAGATGAAC
TTTTGAACGACCGATATAAACTAGTTGAGACTCCCAAGATTGAGCATGGAATGAGAAGTT
ACCGATATCCATTCAACAGGAAAGATTATACGCAGGGACAAAAGCATATACAAATGGAAT
TGATGCAAAAATAAGATATGTCAATACAGATGGCAGCACGACACACTACCTGCAGGATAT
GAAATATATCCTTACTGCTCAGGAGATGAAGAAGAGTATTTACTTCGGTCAATTAGACGC
AAATGGCAACAAAGAATTTGGTTCGAC
>cap3_Contig297
CGTGCTGCTACATAACATGTGTATTGAAAGAGGAGACGCGTGCGAGAGGAGGTGGAAACT
GGAGGATGAGGAGATCGCCACGATGTCGAAGCGCATAGAGGCGATTGAAGATGAAGATCA
TCCGTCGAAACAGAGCTGCATGAAAATTGCAATACGGCTTTAATCAATGTTGCCGAAAAA
CGAACGTGAGCGAAACGCACGTAATTTCTTTGAATGGTCCGCCGAGAAAAACGAATTTTG
CGCTTGACTCATATATTTACTATCGCTCAAGCAAATGTTTTAATTTGCATGTCAGGTATA
TATATAACAACTTTCTTTTGCAAAGTTTCTAATTCAGGCGAACATACGAAGAAATAAGGA
AAAATGCTTGGTCCGTCAAGAAAAACTATTTTGTGATCGACTGTAATGTGCAAGTGCTGC
TCACGTAATGACTCCGTAGAGGAACCATGGCTATCGTAACATGCATCTTACCTACAACAG
AAGAAGGTCTGAGTATTGAATCTACG
>cap3_Contig298
CCACAATGTCTTCAAACAACCAAGGAGCTCTAAACCAACTTGCACAAATACTTCAAAATC
GCGGAATTGATGCAAATACACTCGGAGCTTTGTTGTCAAAAGATTCAGCATCATCTTCTC
AATCCCAAGCAAAACCAACATACACTAACTATTCAACTACGTATCCTACCGTTTCATCAT
ATGATTACAGTTACAATAACAAACAATCTTCCAGTTATGGACCTTCAAAAGATGATGATC
CAAAACGTAGTTATAGACCATACTAGGATTCAATGTGTTGCAGTTTGGCTGATTTGAAGG
AGATGAGAAAGAAGTTCCCTCGATTATCAGAGTAAAAAATAGATTACAGCTATCACATCA
GATTATGTTTTTGAAGAGACTCAACTACAAGAAAGTCTAAGCATCATTTTCACAAAGACT
TCAGAATAAT
>cap3_Contig299
GTTATCCTTCACAGTACCGAATAGTTCTTACTGCAGAAAGGTCGTCTTTTGTAATCCCGA
AACGCACAATGCAACAATGACGAGCATTAATCTGTATTTCGGATTCGTTTAGCAAATCAA
ATCCCCGTTCATTTTACGTGCATATTTTCCAGATTATTCGATAGCCCGTCATTAATTCCC
GAAGCTATACTGTTTATACCTAACCGCTTACGCTCATTTTCGTAATTTTCAATGTTGCGT
TTCATTATATCAACACAAGGTCCAAGCAACCTCTCGAACGCGTAAATGTCCAAAACCGCG
CATGTCGTGTCATCTGAAATGGAAACAACAGACGCTACTCTTGGTTTATTGAGAACTAAG
GCTAATTCACCAAAATATTGTCCACGTTTCAATTTAACAATCTCTTTATCCAGATTTGTC
TTTTTATCTCGTACGCGCACTGAAACTTCACCGTCCATTATAAAGTACATTTTCTCTGCA
CCATCCCCTCCTTTATAATAAGTTCATCGTTAGGAATTGCACCTCACTAAGAGCGTCT
>cap3_Contig300
CCCAGTTATCCCCCGCCCAACACTCGCGGTACATTTCTGATCCACATAAAGAGGTGACGA
CTCTTTGGTAGGGACATTCTAATTTAAATCCAGATACTCTTGATTCTTTCAGACTGCAAT
CATTTGTCACTGTGGCCGATGTTCTGCAGCATTTGAGTTTGGTAGCCCAACTTTCCCCGT
AATGATCGCAATCAGCAAGTGCGCCGCTTCCGCAAGCTCCTGTTGCTATGTATCCATGTG
GACACGCCACTTGTTTACCGTTATCACCAGGCAGCCATTTACATTCGTGATCAAAAACTT
GACCATCGCACGACCCCATGTCACATGTTTTAACATCATCTGATTTTCTGGGACAAGGCC
GACCCCCTCTTCCGGGGGATGGTTTGTTACACTGGCGACTTCTCTTCTGTTCACCTTTCC
CGCATTTGCTCGAACATTGACTCCAGGAACCTCCACTCTCCCCAATCGACCGTCCACGAC
GCACTTGTAAGTTTCTTTCTTCGGATCAATCACCAT
>cap3_Contig301
GAACGAACTATACTGAAAGGAGTATTCGATTTAGGGATCAACAGAAACTAGAACGACAGA
AGAATGATGACTTTATCCGCCAAAAACAAAAGGAGAAGCGTGCATCCTTTGATACCATGG
CAAAAGCCAAAAGATTTTATGAACAACGATGTAAAGAATACGATTCAGCGAAAAAAGCTT
ACGACGATAAATCTTCATATACTCCGAAAGAAGAGGAAAAACTGAAAAAGAATATGCAGA
AATGCAAGACCTCTCTGGAGAGTGCAGATTCGACTTATCAGAGCTCCATTACAACACTCG
ATTCACAACGAAAAAAATATATAAATAGTTTTGAAGACACGTGTAATAGGTTTCAAGTGA
TCGAGGAGGGACGTATACAGTTTCTACGCAATGAATTGTGGCTGTATTCGAACTACGGTT
CGACACATGCTGTTAATGTCGATCAGAAATATGAGCAATGTCGAAATTCTCTTGAAAAAT
GTCACGTGAAACAAGATTTAGAATTATTCATCAC
>cap3_Contig302
GTCAATGCACAGTAAAGCACCAATAGCTTAATAAATATGATAAACATCTCCATTAAAATA
GATTAAAATATATACTTTCGAATTTTACAGGAACAATAAATATAAACTCTTACTTGAAAA
CTAAACTCTCTTACTTGAAAAATGAACAAAATATAACTTTTTCTATTACTGTCATTTTAA
GGACTCAGGTAGACGAATGACAGTTCTTGTGACAAATAGATTAGTTCATGCTGGCCAAGA
TTTCAATTTCTTTGCTGTAGTCCAATGAAGACTTCACCGGAATCTGAAGAGTTGATAACA
GATATAGACACTCAAGATGATCTGGAGATATGTGGTTTCTGCGTGGTGTGCATATAATCT
CCAGCCCAGTGAAACTACGCTCCAATGGAGAAGTGTTTGCAGGGGTGCTCAGCATAATCA
TCACAAAAGCACAGAAACTAGGGAACCGTATTCCTGTAT
>cap3_Contig303
GGGGGTCAGGCATTTTGTGACACTGCATCATTTTTGAATGGCCCCAAAGTATGATTTATT
CTGCTTGTTCAAATAATTAAGAAGAAAGGATTTTATTGCCTATGTAGGTTTATTTTCAAT
GGTTAGGTTACAGTAACAGAAACACTTCAGATGAAGATTGGTAGGGTGCATTCTTTTCGA
ACTCATCAAAATAAATAAATATTTTGATGAGTTCGAATTGATTAGAGCATCTCTGTAGAG
GAGTCGAATATTCATGTTTGCCTATGTTATCTGAAGAAGAAATGCTCATTGGGTGTGGTA
TGGTACGAAA
>cap3_Contig304
GTTCATCTTCAATGATCCTACCTTTAAACAATTAGTTGTAAAATTAAAAAGGAAACTGAC
TGAATATAAAGGTAAGACTATTTCTCTTTAAAAACTTAGCTTTTTAAATGTACCGTTATA
TGAAATTTCCTAGTTACATATAAGGGGAGATAAGGTTTTCGACATTCCGATATGTTTCAT
CTTTTTTTTCGATAAACTGATATTTTTTGTTTATTCATACTGAGATTTTTTGAAAATTTA
TTCGCATCATAACAAAAGATTTCATCAAAGTGTTCATGTTGCGATATAAAGAGTATCAAA
TTTCTAATATTTTTCTTATTTCTCTAACAATCATTGGGCTTTCTACCACCTTCTGAATAT
GTCCAATATCGTTTTTCAAGGTAGTTTGAAATCTCACCTGGACACTTCCCTACTCATTCT
TTGCACATTTATATTGTTTATATATTCATTGATTGTAGAAAAGATAGGGAAACTCTCTGA
AGATTTAAAAGAAGTCAAGAAACCATGTGGAAATACAGATATCAAAGATTGGAATGTGAA
GGTACGTTAATTTAGGTAAAAAATTAACTTACG
>cap3_Contig305
GCGAAAAATGAAGAATTTCTTAAAATATCGTGCCGATGCTTTTCCATCAACAACTGCAAT
GGCGTCCAGCAGGCGACACCAGATAGTTGAAAGCTAAGTATTTGTTTCGTTTATTTACCC
TAATACTCAGGAATGTAGGAGCTGAGTAGCATTTGTTTAATGTAATAAATATTTGTGCAG
TCTAAACCCTAGACTAGCCCAGGTGACTATTTTCAACTATTCAGCTGGCCTAATCTAAGG
TCAAGAGTGTGCTAATGTAGTAACATTATATACTGCCACGGACTCTTTAGTAGTTGGTGG
CATTGCAATATGAAAACCTCGGCTCCTGCTCTTAGCGAGGGCTTATAAAACTATCGTCTA
CCGGGCATGCTTGGTAGGGTCGACCCATAATGACCATAATGACGAATCAGTTTACTGGTG
AAATCCTTGGTGAAGCCATAGTTTGAAGATTAGAGAGGCTAAAATTCATTACTGTTTCAT
TTAAGTTGGAGTATACCTTAAAATTAAGGACCCTTTATCTACTCC
>cap3_Contig306
ACGACCCCCGTCCGACAAAGTGCTAGTCACGTGATTACAATAACCAACCCCCTGAACCAG
ATGGTGAACTTCGCAAGTAATTGTAACGTCCAAGATGTCAACTTACCTCCACAGTTGACC
ATTCCGTCCGTGTCTGAGGGTTCTCTTACTTTCGAGTACATGCCGTTGAAAGCGAGCACG
ATCAGTGGCAAGTTGATCCTTCAGAGCATCGAACTCGGCGTTTACATGTACGACCTAAAC
CTCGTCGCAACGAGCGCTGCTCCCGAGCGTCCTGTTCATTTCATCACCACCCTCGGTACG
AGCCAATCACAATCGTGCAAGTTTATCAATTACGCAAGAATACGAGTGGAATATACTTGT
AAGGTCGACTCTTCTGAATTCGTCGTCGAGAAATCGATCAACGCCGCGTCAGCCGCAAGC
GGTGGCAGCGAAGTCAATGTCGACGTCACTTTCGAACCTTCGCGCCTCGGCGACTGCCAA
GCGCTTCTCACCGTCTTCTCGGCGACCGGTGCGAATATAC
>cap3_Contig307
TTTTTTCATGAGCACCTTTTACGATTAAGTAACTAATCTTGTGATTATTTGGTAAAACAA
TGGGACGTTTACGATCTTCATCGAATAGTTCCATATTTGCTAATCTCCCATTTATTTTTA
CAATTCCTTCTTCATCTTTATACGGAAGTAGTTTCTCGATACATTTCATAGTATTGTCAT
TCAAACCTTTTTTGAGCCTCGACTACCCAAAATTTTCTTGCTCTTTCAATTACTTCTACT
GATAGCA
>cap3_Contig308
GTTTTCTGTTCTTTTACCGTCTGCGTAGTTAAACTACTCGTTAGTAATGTCAGTTAAGGG
TCTTCTTGGGTTGATACAACCCAAATAACTAAAAAATAAGGGCGTCAAAATTCAAGCACA
TTAAAACATGTGACAATTTTCATTTTTTTTATAAAAAACTTCTACGTTTTCGCATATTTC
TTGAAATCGTAAAAAGTCACGCGATATATCACCCAAAAGTCGAGTTAAAAGAATTCTCTC
TCGAAATTCACAGTATATAACACCATGTGTCAAATTCGAGAAATACGAAAACGAAATAAT
AGAACGCGAAGAATATTTACAAAAGAGGCCTGGGGGAGGAACTCGAATTGCGCCCTTCTC
TCCTCCAATCATCATTCGTTATTTCTCATCTGAAGGGATAGTTTAATTGATCGAGTTCTA
ATAGCGGCGGCGGCGGCGGTGGGGCACGGAAGCGAGGCTCTTTAATAATGGTTGTGTCTG
CCATGTCGTCTTTTGTGAAAATTCGAATGAAGATGT
>cap3_Contig309
CGGAAAGACCGCCGTACGAGGAAGTTGGCCATGGCAAATACTCATGTTGTTCGCCGGACA
ACCGATGTGCGGGGGAACATTGGTGTCACCGAGATACGTTGTGACGGCTGCTCATTGTGT
GTACGGGAGGGAGACGTCCGATCAAATTACAATCAGGGTGGGAGAGCATGACCGCGATGT
TTGGGACGGTTCAGAAGTCGACGTCAGAGTCATCCAGGTATTACGTCACGATAAGTACGA
CCCCCGGCGTTTGAATAACGATATCGCCATGTTGTACCTGGAGAAACCAGTACAGTTCAA
CAAATATGTGTCCCCCGTTTGTCTTCCAAAAAGTGAAGTGCCACCTGGTTCCAAGTGCTA
TATAACAGGGTGGGCAAGGTACAACATCCTGGTGTCATGACGACAGTACTCCAACAAGGC
CCTCCTTCCCGTCGTCAGCAATGACGTATGCTACAAGAAGAACATCCAGCGT
>cap3_Contig310
TGGTAGTGAATTTTCTAAGCCAATGGAGATATCAACATCGGCCAATTGCTGAGACAACAA
AAAGAAGTTATTTAACATCTTACATGGATACGATAAAAACACGTCAATAATTAGTTCCTT
TGGTTGGTGATTATATTGATCTTGCACATTGTGAGCCCTTGCACTTGAAAAATAACGTAG
CAAGGGAACTCTTTGATAAAATCTCAGATGTTGTGATAATTGAAGCTGAACTTCCATTGA
ACGTTAATTATTAGAGTATAGATGATTGTAATATCATGAAACAACATTGATTTGTAACCA
GTTGGCCAAAAAGACTCATTCTCTGGATCAATGAAAGTAAGTCTAAACTGATAGCAAGTA
CATTCAAGTTTAGATTATGTGGTCATGAAGTTTCAATTTTGTACGTAAATTTCAAGCATT
GATTCTTCTAACCAAAATTTGACTAAGTCAGACTCCAACCTAGGTTGATGCAAATCTT
>cap3_Contig311
GTATCTTGGGGCCGAAAGAATTGCGTAAAGAACTCAATTAACTTTCATAATAGAGGTAGG
TATAACTTAAACTTTGAGCAATCATTTATTAAATTTGAGACAATACTTTCAGAGCCATAG
CTTCTTTAAGCTCAAAGTCAATTTTCAAAATGAGCAAAAATAGGACAAAAATAGGACAAA
AATAGAGTATTAAAATCAAGTCAATAAAACAAAATGAAACTCCGCATAGCGTTACCTGCG
TAGTCTAAAAGCCGACAAGCCTTTTTATCATTTTGCCAAAAACGATGTGGTTACTTGAAT
GCCAAAAAATATGATGAAAAGCATCGAAAATCACATGATGTCGAATGGAATCAGATGCAC
TGTAGTAAAAACATCTTTATGAAGTCAGCTTTGTTGACACTTTTTGAAATTTCAAATTTT
ATTAATAGTAATCATTTTATTAACCTTTGTTTTCCGTTTGTTCAGCTCGTGTTTATATTG
TTTTAGCTTCTTGGTATTCCTTTGTGTTTACATCGTTCATTTAGA
>cap3_Contig312
TTCACTTGTTTTGTAACTCCATTTTGAACACTTGTTTTGTAAATGGCATAGTAAGCCCAA
TTGGACCAATATAAATAACCATCCAAAAATGTCATACTGTACATGTGTTGAGGAGATATG
AAGCCAATAGTTCGTCTGCAAGATCCATCATAGTTAGCCTCTTCAATGACATCATAAGTA
GCATCTCCCCAGTAGATCTTATATTTTTGACGATCAATTGTCAAAGCATTAACTTGTCCC
AAATGGTCACCAATAACTTTAACATCAAATGGATTACTTCCATTCATACTATAAATCTTT
TTGCGCACCATAGTCAGCAACAAATATCAAACTTTTGCATGAATCTAAAACTAATCCCCT
AGGAGAAGTCAATTTTGGACCCATGGTATATGCAATCCCGGTACTGACACTCATAAAGTG
AACGAATCCATCACTTGCTGTGTAAAACAATACGGACAAATGAAACACCATATCTTGAAC
ATATCCTTGATAAATTGTTTTTTTGACTAGCGATGTATCTTTTTTCTGTAAATCATATTT
GTAAAACGAAGAATAAGATGTAGTTTTATTCCATGTAACATAATAAAGTTGCGAGGTATT
GAAATCATGTGCTGAGGCAACAATAATTTCTGTCTCATTGAGTAGAATGTCCATCTTGTT
AGATTTTGGATTTAGCACAAAGATGCCTCGAGCATTAGAACCATAGATGTGATTATTAAT
TGTGCATTTCTTATGGTCGTCACCAACATAACCAATTGAGCAGGAACATCTTACATGAGT
AGCATTGAACTGTAGTACACATATCACTACATCCACCATTCTTGACTTGACAGACACCAA
CTTGTGGTTGAGTCTA
>cap3_Contig313
TATGTCGTGAGATTCTGGACGGATTAATGAATCTTAAATTTGTAGTTAATTCCGAATCTC
TGATTATCGATAAAGATGTAATTGTAAAAACTCAAAAAAGACTTCTTGGGATATAGGAGA
ACGCAGTCTGATCAAATACTACAGATGGCACGATTTTACGAAATGCTATCCTAGCCACAT
ATAGATGATGTCCCATAAGCGCGATAATGCTTGGCTTCAAAAAGAACATTTTAATAACCT
CGTATTGGCCAATAAATGAAAAAAAAAGGTTGATACCATACCAGTAAAGAGAAATATCTC
GTGACCTATTTATAAAACATAAATTTTCATACCGTATCTGTATCTTATTCAAGAGGCAAT
TCCATGTAGCAAAATTTGCACGTCGAAATAATCTCGATATTATCCAAAAATAGTCAACTC
GATTGGTTTATAAAGTGGTTTAACGTCATACTAATCTAGTGTAATTTAGTTGAAATTGAC
TAATATATAATAACTACTGTGATGATTTGGTTATTCGAGTGTAATGTACGTCATCAAATA
C
>cap3_Contig314
TGAAAAGTCACGGAAGGCAGTAATCGGCTTGGATGATTCACTAAACGCTGAGATGCCGTA
ACGTGTTTGTGATTTGACACGGAATCGATATACTTCACCTGCGTTGAGACCAATCACTTG
ATAAACAACTAACGAACCATCATATCGCATTTCCTCTGCGAGTATAGTACGATATTCTTC
CCAACCTGTATCACTCGTCTTGTATTCCAAGTAGAATTTATCGACAGCAACATTTCCAGT
ATCTCCAGTCTCCCATTGAAGCATAAGCACGCCTTTGCTATTTTTGTATGGTTCGGGGGC
ACCAGGTGGGCGAGGATCACGTTCACGAAATGGATATGTTTTAAAGGGTAAGTCCGCTGA
TTGCCCATAACCCATCTCAGTTTCTGCAAATAATTTTACAACGTAAGATGTATCAGGAGC
TAGTGCTGAAAATTTCAGTCTCTCTGGGACAGGATACTCCGTTCTTATAACATCTCCAGT
CATAGCATTACTGAGTACCACCTTATAGCGCATGATTCTTCCATTAGGCTGACAAGGTCT
TTCAAAGTCAATATCAACCTGGT
>cap3_Contig315
CTTTTCCACTCTTCCATGCATGTAGTGTGCACCTACAGAACATGACTTAAATCCAATGCC
ATGTTCTTCGTTCAGTTTCCCTTGAATATCTCTCATTTTCAGTTTCATTTCAGCACAACC
TTTTAGAAATTGGCTGCCTTCATCTGGTAACATTATTTTATGAATTCAAGCTCGACTGCT
GAATCGTTTGAAACCAAAAATGAAGGATCTGGTTGTGTAACTCTCCATCACTTTAATATC
AACGGCTCCAGTTGTACAACAGCAGAATACAATTGCCCAGATCTTCATTTTTGTTCTTTT
GTTTGCTCCATGATATGATTCTAATGGTCCAAGCAAGTCTACTTGTGTTACATAGAACGC
CGGAGCAATATCCAAGTTATATTTTGAAACTGGACCCATGATAATTTTGAGTCTGTTCTT
TGTTCAACAAACGACATTTAACACTAATTCTTTCTAATTTAGGAAACTTAAGTCTCTACC
TTCTATTATATGAGCTATACTTCTATTTTTATCTTT
>cap3_Contig316
TTTCCAAAAGCAGATGGATCACATTTAGGTTTTAGCGTCGAATAAACTGGTCGAAATAAA
GGTTTATCCTTTTCGACTGGCTCTCCAACATCGATCTGACGACCCGCAATTAAATTCTCA
CCCTGTGCATTCCCAACGGGTGCAACAAAATCAAGCCGGCTATTGTGCTGGACTTCCCGA
GCATAATTCTCTACATTGATACCAGGTTGGCTCTTCAAACCTCTTATTTTACCTGGCGTA
TAGAATTTACTGATGATAGCTTCTGGCTTTTCAGCCAACTCATCATCCTCACCCAGAAGC
TTTTTACCGTTAGTCAATTGGTTGTTTATCGGCCCAGTCGATATGTTGCGACGTGGACTA
TAGATCTTTGCTTTCATTTTAGGTTTCTCGTTCATCAATGGACTTTTTCTGAGAACTTTC
CTTTTTACTATCTTTATTGAAATCGCGAAGACCAGTTTTGTAACCGATATTTTAATTTCG
GTATCTTCATCATTGTTACCCTCGGCATCGTTTGTCTTATCGAATTTACTCACGACGTTA
TCCGGTTCCTTGATTTCGTTTTCGGTCCTTTCTTCGTCACTGACACCGACAAACG
>cap3_Contig317
GTTCATGAAAGGGATGCAGGATCTTGCAGAAGATCAAACTTACAAAGATGTTGTAAACAA
ATGTGGCTAAAGTATCAAAAGGTATCATCCAAAATGTCATCCTTTGATCCAAGAGAATTT
GTAAAACATAACAACAAGGATGAAGAAACAGTCAAGTATCCACTCAAGCGGTTTGAGCCA
ACATTGCGCACTTCACTTAAAGTTGTCATTCCCATGAACTTGGACCGTCTTAAGAAGCAT
AAAGTCAATGTGGAGAAGTACATGCAAACTAAAAAGTGGCGCGAATTGAATATCGAACAA
ATAAATGCATCCCGTACTGTTCAACAACTTCAAGCTACAATCAGAGATTTAGATAAAATT
CGACATCAGATCCAGGAGAACGATGTTGAGCAATTTGATAAACAAATTGCTGGTATGAAA
GTTGAAGCTCTAACAGCTGTGCAGGAGTTCTGTTCCCTCAAAGTACCGAGTAGTAATAAA
GATAGTTGTGATGATCTACAATCAAATATACACCAGGATGGTGAATGCAGTGGTAGCAGC
AGAGACACTGACAGTTCAGTACGACAGCGAACTTCCATCAAATCATCAGATTACCATTCA
GCAGGAAGCACTTTACATGACAGTAGTAATTCTGAGCTGGAAACACCTAACAGTGATATG
GCTGCTGTTCAAGCAATGCATAGCGACGAGGAACATGCAGCATACCAATCATGGGATAAT
CTTAAAAAGTGGTTTGATAGATTTGGATAGCTTGGTTAAAGATTTTGCAGCTTGTGTCCA
TCAACAACAAGAAATGATTGACAATATCGAAGATAATATTGAAAATACCCAATCAAAATG
TTAATAGCGGCTGCAAACCTG
>cap3_Contig318
GTAGGTGACTGAGACTGACTGGCATAGGTGAATCTATAGGACCAACCTAGGTTAACCTCG
ATACCGGTGGGTCCAAAAAACGGTAGTAACGGGCAAAAATATAAACTGTATTAAAATCAT
TGTTTTGCCATGCAGATACGATTATTTATATGAGATAGCTCTACCCATAGTTTCCCATTA
AATCTACAGTTTCATCTGGTTTCATCGTTCTTCATAACGTACATCTTCAAGCCTAAAAAT
AGCTATCGTTAACTATTTCCATTCGTCTAAACATAGTACAAATCATATTGGCTGAACGGA
TTTTATCTCGATGAGGGAGTCCTCCTGCGACTGAGAGCTGTTGAATTCCAAACACCCGCT
TTATACTAAGCCTAGCACCTGTCTTCTCTAGACTGCGAAGGGAAGTAATTCTTGGATTGA
AGATGGCAAACCATTTGTCCTTCTTTTGAATAGAAAATGACATCACGATCAATATAGATG
AGACATTTTCCGAAGGAGTAGACTGTCT
>cap3_Contig319
AGCGAAGTTAGCTGAAAAAGAAGAAGAACATGCAGTCAATATGAAGAAATTGCAAGAGGT
ACACACCTGTGCAAATAATCTTGCTACAACTAAAATTCTTGAACAAGAAGAAATTACAAG
TAATTTAGCTAAGAGAGTTGAAGCTTTACAATTTCGAAGAGATGACGTACAGCAACAATT
CGATACAACAGCTGAAGAAGTGAATAATAAAATTACTCCTTTGAAACAGAAAGCTGTCTG
TGTCGATGCTCGCGAATGTGCATTGAGTTGTTACAGATCTAATCCATCTCATCCTCTTAG
ATGTTCTGATGAAGTTCAAAATTTTATTAATTGCGTCCAAGAGGAAAGAGTTAATTTAGT
CAAAATGCTGCAAATTTAGTTTTTTTTTTAAANCAATTAATGGAAATTTAATGTCAAATA
CCAGATGAATCACATATT
>cap3_Contig320
GGATCTCTCTCGATAGCAGCCGGTAAAACTTTGGATGTTTTTGGAATAGTAACTGGAGAG
GAATCAGCAGCATGTTGAAGGGAAATGGCGTCTTTGAGTGATAAACCTTTCTCTTTGCTT
TCAACATCGTTTTGAAAGCGGACGAGTTTTGCACTTGGGTCGTTACGAATTCTGGATGAG
GAAGCCTCTCCATTGTGATCTTTGTTACCGTTATCTAGAGCTTTAGAAAGTTGCTCTTTT
GCTTTATTTACGATCTGCAAAAACATTTGAACATCATGATAGGATAAGCGTAAGTAAACT
AGGAACTTGTAAACTGCACTTCGAGAAC
>cap3_Contig321
GGGAAAGATACAAAAAGACTTTTCTTATATGCAGCATTCTTAAATTATAAAGATGGTATA
AAGTCGAGCAGACGTGCTTTACCAATTGGTGGTGAAATTGATGCTGAATGTGGTATTAAT
GGTTTTCCAACTGTCAAATATGAATGGCGTGATCCATCAGGTGATGTAATTGATTCAACT
AAAAGGTTAAATCTCTATAGAATCAGAAGTAACCAGTTTGGCAATTATACATGTGTCGCT
ACCACAACAGTTGTAAAAGAGTTAAAGTTGACATACTCATTACATGTGGAACAGAGAAAA
GATCCACCTGTTATCAGTGATTTAAGCTTTCCCCGTCGTAAAATCGTCAACCGTGGTGAA
AATGTGCGATTCAATTGCAGTGCTAGCGGTACCAAACCTACGGTTGAATGGTTTTTCCCA
GTACATTGGTTGATGGAAAAGATGGGATTTTAACCTTAAACAACATCCAAAGATCGAGTG
GAGGGAATTACACTTGCCTTGCTAAAAACGAAGTTGGTACTGCAAATCGAACGTTGACAC
TCGAAGTAGCTTATATTGAATACTCTAAACCAAGTGTGACTAAGGTACATGTCAATGTCA
CTGAAGGAGAAACTATCACACTTCCATGTCGAGT
>cap3_Contig322
GAGACAGCTTTTCTAATTGACTAGTTTTCCTCCTGCTGGAGAAATTTAAGATTCTTTTTG
TTATTCTTCCATTTTCATCATTACTTAAGAAAACGCCCTGCTTGTCTAATTCGCCCTTCT
TTAGACTGGTTTTACATTTCTGTTCATTAGAACGTTTTCTTAAAACTTCATCGTCACTTT
TGGTTTCTTCTCCTGCTTAGATATAGACAAATGTTTGTTCGACTTAATTCCATCAGATTC
ATCAGCCTTTTGACCATGTCCTGGTGAATTTGACCCAATTTTGATAGCATCCCTAACTTC
AACATGTGTCTTTCCACTTATTGAGTCAACATTGGACTTTACACCATTTTCATCATCGTC
ATTGCTAACTGTACTGTCTTCTGATGAAAGAGAGTATTTGATTGATACAACATTTT
>cap3_Contig323
CAAAACTGGCATCTAATTGCAGTGTTTATGGGTCAACAACATATTTGTGTAATCATATTA
ATGAATGTACAAGTACAAAAGAGGTTTTTACATGCATATTGAAAGCATTTGAACATGCTC
AGGCTTGTATTGTTGAAGAAGATGCAACTTTGACTACTCTTTGTGTTGCAGTTGTCATTC
AATTACAAGAGAGAGATAAATGGTGTTTATGTGTCGTTAATGTTGGTGATTCATATGCAT
ATGTTTATAATAAAGATGGTGTAAAAGAGGTGACACATGGCTCACATCCAATTGACGAAG
CTAGAGATATGCGTTATAGTGGTGGGGCTTTAGGACCTGCGGATGGTTATAATCCAGATT
TAGGGAACTTAACTTGTTCGTTAGTGACCCTCGATGAAGGGGATGTTGTATTTTATGTAG
TGATGGTATATCAGATAATTTTGATTCCTTCTGTTGCTAAAGTTTGTACCT
>cap3_Contig324
GGGTTGTGTAAGGGTGTGTCAAATCCAACATGGCTGACGCAAGGAAGATACTAGATATCT
TGTTAGCAAGTCACTATATTATTATTAAAAATCATCGCGTCGCCTCATCAAGATAGCAAC
AGCTTATTCAATTCATCACTTCGTACAATGATCCTTCACTATATATACTACAACTGAAGT
ACAATCAAAATGGCCTAAGTGTATAAAAAAGATTACACTTGACACAGTTCATTAACTAAG
TTGTCACAGAAGAGCAATCATTTAATTATTAGGCTTTATCTATTTAGTTTATTTATAAAT
AAGCATTATATAATGATGACACCATAGGTAATCATTAAAAATTAACTGTAGTCTATGGAA
TAAATAGTCTATTATGATAAGTAATGACCTATTATGAATCTTAAATAAAAGGTTAGAGAA
TACAAACACATATCTATATAAAATGACAGTTAAGTGAATAGGGAACTTATTAATCTATTA
AAGTAGTGAAACCAAGCAGAAGAATCATTCATATTATATATCTAGCAATTATAGTACACA
TGCTATTTAA
>cap3_Contig325
TTCTGTGCTCAGCAAAGGTTTCTGCATGATCTTCTGGATATGCAAAGGTCTTCGGTATAT
TTGAAATATAATCTGGTCTGTATAATATAGAACGTATAAGCTCTTCTTTATCTTCCGGTT
CCGGCAACATGGTAGCAACATTTTGCTTGTAAGCACAATTGGCGACGCTCAGTGCTATTT
GAAATGACACCTCTTTGATTTCGTTCAGAGGGGGGTAAATTCGACCTAGCTTGATATCTG
CCTCATCGACTTGTTTTGCCAAGGTTTCTGCTGCTACGAGGAACATATCCTCTGTGATGT
GACGCGATTGTGTTGCAATGACACCAAGAGCAAGTCCTGGAAATATATAGACATTATTAC
TTTGACCAGGTACGAAATGTGTACCGTCTTTCATTGTTACCGGGTTGAAAAGGACTAACC
GGAAGACAAANAATACAGCGGCCGTCTGTCCATTGA
>cap3_Contig326
TAGTACGGTTGGTCATGTGACGAAACTGGGTCATATGTTATGTTTCGCAGAAACCAAAAC
AAGAACTAAATCAAAGATGGACGATAGAAGTTGGGTTTGGAGTTATATTTATTGTAGCTA
GTAATGTTATGGAAGTAGTAGATAGTTAGTAGATAGTTAGTAGATATGAATGTTGGCTGA
AAAATATTTGCCCAGCCTGGCAAATTTGACCCTGTTGATTTTCTGAATCCTGAGATTCTC
AGCTTTTCAACCATATATAATTCATCTATATACTAATTTTGTCCGGGTTGCCCAAAAATT
GATGAAATTCTACTGGACTATTATCACCATACTGCTGCACTTGGTTACTGTTGCACTTGG
TTACTGTGCACAACAAAAATCGCAAACCGTAGTCACAACATATGGTTCCATCACAATGAA
GAAACAATAGGAACAATATATAAACTGAGACGCAGATTTTTTGCTATTTGACTGAAGAAA
AAATATGTTGCAAGATAGTAATGCGTCTCTCCATTTTAATTTCTCTTTAAGATCTCTTTA
GAAACCCGCGAGAAAAATGTTTTTAGTACCATAACTTCCCTAATTTTCATTATTTTTCAC
AAAACTTGTTGTATGTAG
>cap3_Contig327
GCGCTCAATGATCTCTCTGATCAACTCGATCACGCAAGCAAACAAAAGCAGAGAGTTGAA
AAGGAGAAAAACCAGCTGATCATTGAAATCGACAGCCTGCAGGGTTTAAACGAATCCTTG
TCTAAGGGAAAGGCCTCCGCTGATGCCAAGGTGGAGGCCTTGGAGGGTTCCAACAGCCGT
CTGAAGGGCCAGGTGGACGATATGACTCGACAGCTCAACGATCTCAACTCCTTGAAAGCC
CGCCTTACTCAGGAGAATTTCGACCTCCAGCGCCAGGTGCAGGAGTTGGACAGCGCCAAC
GCCGGCCTTGCCAAGGCAAAGTCTCAGCTCCAGGCTTCCAACGACGACCTGAAGAGAAAC
CTGGATGATGAGAGCAGACAACGACAGAACCTTCAAGTCCAACTGTCCGCCCTGACGAGC
GACTACGACAACCTGAACGCCCGATATGAAGAAGAGTCCGAGATCTCCACCAGCCTTCGC
GCTCAATACTCCGTATGGAT
>cap3_Contig328
CTATCCAACCTCGGCCCGGCTGCCCACCGACCTANGTTCAGTAGACAAACATCTAGTCGG
ATCAGCAACCATGAGTCGAGCGGTTATGATTCAATCAAGCGCGGACATAACCAATCAAAT
ATTGGCCATATATATTTATAATAATTCAATTTATATTGTTTTTTTCTGACTCGTTGTGTT
GTTTTTAGTACCTAAGGAGGTAATCAAAACTATTAAAAACGTTTAATGTTAATTTGATTG
TTACTTCTGAGTGATTACCAATAACCTTTACAGAGCTACTACTGATAGAAATCCATTATT
TCTAGTTTCACGAAGAATTCTGAAACTTCAATAGCTGTATGTGAAAGAAGACAGTTATTT
GGAACAGAATATTACGAGGAAATTAATTTGTGATTTTGTAATTAAAGTTTGTAACTAATT
CTATTTTTATTTCTAGTATTGTACCCTACAAAGAACGGGATAGCTAAAAGAAGATATTTT
TAAAAACACTGGTATAAGAATGGTATAAGAAATGAGCAAAAATAAA
>cap3_Contig329
AGCACATGTGTGCCTTGTTATTAAATGGAAAGACCCAATGGCAAGATTGGTCGTCTGATT
ATATCCAATCACCTTTTTTAATCTGAACAGTGACGTCCTAGAAGGCAATCACTACTGTGC
AACTTTTTAATTATGTTAATAGAGGCAAATTAAATTCATCCTTATATGCCTCCTTTTCAA
TTTTGATGATGTTGATGATTTGCGTAAGATTATTCCAAAAAGNGTTGAATCAAATCACTC
TTACCTTTGAAAACCTCATCAATTAATTCAACAGCGGTCACTTGTCGTGACTTATTGCAT
CAATTATCAGGTCTGACATACCATGTAAACATCAACTAGCATTAAANACAGTTG
>cap3_Contig330
ACTTTACCTACGTTCTTGTTCGTTCGGCCATCAATCCACACTATTAAAAAAGTTTATGTG
AAGAAGTTTTATTATCATAGCCATTTTACATCTTGTTAGATATACTACTGTTTCAAACAG
ACAACTGAGACAACTTTGAAAAATGATGTAATTTGTTTAGTTCTTGATGAACAGTGAATG
AACGAAAATGTTTACTGTGCGTGGGGCTTGGATTGTGTATATTTTAGTCATCTGAAGCCA
ACACAACACTCATCATACAGTTCGGTACAACGAGAATGGAGTGGTACTGAAGACCTCGGT
TTACATCGCCAAAATTTGTTTTTTTACGTGTGTGTATCGTAATAGATATACGGACGGCAT
TTGTTGGGTTTGTCATTGAACGGAGATATACAAGATTTTGTTTCGGATGCCTTCGCGATA
ACAAATTCGAGAAGATGAAGAAGAAAGTTAAGCAATGATTGATTGCTAAGATGATCAGGA
AAAGAGTATGCCCTCCCATTTAAGAAAAAAGAAATAGATATATCGTTACATTGCCG
>cap3_Contig331
TGTTTCAACGGCTGCTTTCACGCAAACCTCACAAAACACATGTCCACACGAAGTAGAGTA
TAGACGGCGGGTCTTAACAATTTGTGCAAAATCGTCCATGCAAATCGGACATTGTAGTTT
TCCACTAGTTGAAGATTCAGAATCTTCTTTCATTTTTGTTCGTTTCTGATATTGTGTCTT
TAGAAGAACTCGAACATGCTGATGACGATGTTGTAGCTGCACTTGTCGGTTTTATCACTG
TTTCGCGTTCGTGCATCAGGGACCACAACGATAAAAACGCGTCCTCTTCTTCAGGATCAT
CTTCTTCGGTTCCTGCAACAAAATCTAAGAATGAGCTATCGATATCGACACTTCCCGTAA
GATCGACAATATGCCGATTCATAATTATCTCAGGAGAATTGCTTCGACTCGTTCTATTAC
TATTACCAGGTGTTATTTCAATGACATCATCGCCTATCGGAGACGATGGAGTGTCTGGTA
GCTCGTCAACATCAATGATTTCAATAGCATTCCTATTTGTATTGTTTCTATTATTGTTCA
ATTCAGTATCATTACTATTCTCTGTACTACTATCTGTAGGATTCAAAGTCTTTGAACATC
CACAACCAACAGATGTTAGGAAAGGGATACGATTTCGTGATGTACTAGTCGATGGAGTGT
CACACTCTACCG
>cap3_Contig332
AGATGCTACTATCCGATTCCTCAAGGCGAAACTCCGTGTCATGCAAGAGGAGTTGGAGAA
CATGGCTGTGGACTGCCGACAAAAAGTGAGCACCATTCAACAACTCGAAGATGAAGTTGT
ACGAAAAGGAAGAAAACGAGAAAGGTTTAACGAAGAAGAACGAAAACCTTCAGAGCCTTA
TTGAGAAGCACAAGAAGGTGGAAGATGAAGTCCGTTCGAAGAACTCTCAACTGGAATCTG
AAGTCAGCAGTTTGAAAAAGGAGCTTGAGGGTATCAAACGAGAGAAGAAACAAACTGCTG
CAAATAAAAATACGTTGGAATTGAGATTGAATCGAGCACTAGAAGATGTCGAAAAACATA
AATCAGCGTTGAAAAATGCTCGAGAATCATCCGCAGCCCTCAACGATACAGATCGGAAGA
ATATGGAACACTTGAAAGCGGAAAACAAGAAACTGGAAAATCAGAAATCAGAATTGATCG
TCGCCTTCAAGAAACAGTTAAAACTCATCGATATCTTGAAACGGC
>cap3_Contig333
GTCTTGTCAAAGCAAAAATAAAACGTTTTCCACGCACAAAAGAAATTGTGCAAACATTCA
AGGATGGCGGAGTTGCTATTATTGATCAATGGATTGTTGCACATGCTAGATACTTTATTG
GAACGTGTGAATCAACGTTTTCGTTTCGTATACATGAAGAACGAGATATTTTAGGTTTCA
ATGCTGAAACAACATACAATTGTGTTTGTGGTAAGCAATCGCCACCTGACAGATGTAATC
AGCCTACGAAATGGAGAGTTGTGTTCTCATGACGGGTATTTCTTTAGACAAGGTTATTTG
TTATTTGTTTGGTGTTTAATCATATTT
>cap3_Contig334
CATTGACAAATTCAGATTTTAATTTTATCGTAAAACTTGTGGAAAAATTTGATGGTGAAG
AAAATAGAACACCAATACTTTAAGCTTCGATATAACTTCACTACTATTAGACAACAAGAA
CAAAAAACTTCGCATTTGAGTATTATTAGAGATAAAAATTTAGCTCAGACTGAAAAATCA
GCTCTGAAGACGACATGAACAGGATGAATTGTAACAGGGTTGGTACTGCACACTAAAAAT
TCCAGCCTAAATTTGCGTTAGAATGATAATATTTCCCAGCCTTTTTACACTCTATAATGA
TGGAATCATGATGATTTTCCAGCCTTTCCAGCCATTATATTTGACAAAAAATTGTTCAAC
TTACTAGATAAAATAGTAGATATGTAACTGGATCAAATAAAAATATGTACATAATAAACC
TTACTTTCCTAAAAATTTTAAGATTGTAAAATGGGAAAATTCTATATCAAATTCCAGCCT
TTCCAGCCTCAGTACCAACCCTGTATAAAGAATGATGGATTTGATCATCAGTGAAAAGCT
ATGCAAC
>cap3_Contig335
ATCATGTGTCCTATGATTGCTCATGTCTACATCAAACCGGCAACCGAGGATGATACATGG
ACGCATTTCAAACGAGGAGTCCCTGTAGCTGTTCTTCATCATGATATCGATCGAATCATT
ACATCAGTTCAATTTTGTTTAGCTGATCCTTACTCTGGGTTTGCCATCTGGCGGGAATCA
CTGTCAGATCTTTCAAAGTATAAGGCCACTCAGAATAATTTCCATACTTTCGAATTATTG
TCGAAACAAGGTTATATGGCTGGAGTAAAATTTCCGTCTGAAGATGGACCATGTAATTTC
TTGCGTAACGTGCAAGATAGTATACCAAAATCATCCAATACTGAACTAACATTTTCGAAG
GTGATGGTGGCATCACCGTTCTTGCGGAGGTTACGTCGAGAAGGGGGATTCACATTCAAG
TATGAGAAAAAAAGATAAATAAAAGATAGAAATATACTACTCCATGTATGTTTACNCATG
TTACGAGTGC
>cap3_Contig336
GTCACACTTAAAATACATAAATAAATACAAAATATGCTAACATAAATACATAAATAAAAA
ACATGTTAACAATAATATTTCCAATTAGTTAAGTTTATTCCTTAAAAAAACAATGCATCA
AAAATGAAATTACATGAAGCACCACAGCAAATTGAAATTACATTTCAAGACTTTTCTTCA
TGTCAAGCACATATCGCTTAATCGAATCGTTCTTCTCTTGCAGGCGTTGGTGAATTTCAT
CCAATCGATCTGCAGTTATCAGTTCAATTTCTGGTGTGATATTCATCTTAGCACAGAAAT
CGATACATTCTTGAGTTTCAGGTATTCCACCAATGAGAGAACCAGCCACTGATATCCGAT
TGAACATCAAAATTGATTGGTAAATATTGTGTGGCTCTATTACCAACCCAAGTTGGACCA
AAGTTCCATTAGTAGCCAACAAGGAAAGGTATTTTCCACATTGATGAGACGCCGAAATTG
TATTCAATAAGAGATCACAAGTTTTGGCCCTTTCTTTTAATGTTTTGTAATCAGTTGATA
ATAAAAATGTACTTAGCTCCAATCTCTCTC
>cap3_Contig337
GCATAGCATAATATTTGATAGTTGTATTTTCAGCAGCCCACTTCTCTGTCATAATAACCT
GTTGTCTCTTATTCTGTGCATAAGCCATTGTACCATCAAAAGGTTTCATTTTTTCAAATT
GTAAATCATCCATGTTTAATTTCTGTACTAACATTCCTCCAGATGAAACATTAATAACTC
TAGGTGCGCTAGACTTCAAAAGCACTTCTTGTAGTCCTTTTGTTATCATAAATGTACCTA
AAGCATTTGTAGCAAAATTCTTTTCAAGTCCATCCTCAGTTAATTCTCTTTTGTTAACCA
TACACCCAGCATTATTAACCAGAACATCTAAAGCAGCTTCTTTTTCGGTAAACGTCTTTG
TAAACGAAGATACATCTTTCGGTTGTGACATGTCTAAAATGTGTACATGTACATCATCAT
TTCCAGACTCTGAAATTATTTCGTTCTTTGCTGTTTCAGCATATTCAGGATTACGACAAA
CCATGTGTACTTTCCCTCCACG
>cap3_Contig338
ATGGATGAGCAAGGAGAGCAAAACAATACAGGAGCGAGCGCGAAGATGTTTTATCATGGT
TATGACAATTACCTCAAGTATGCTTACCCGTACGATGAACTGAAGCCCATCTCATGTGCT
GGACAAGACACGTGGGGGAGTTTCTCTCTTACCTTGGTGGACGCTTTAGACACATTGCTA
ATCATGGGAAACACAACAGAATTTGAAAGGGTGGCACTGCTGTTGGAAAAGTCATTGAAA
TTCGAAGATGATATTAATGTATCAGTTTTTGAGACAAATATTCGAGTTGTCGGTGGTTTA
CTCTCCGCGCATCTCCTTTCTCACCGTTCGAATCTCATGCTAGAACGAGGCTGGCCTTGT
GATGGACCTCTGCTGCGACTCGCGATAAAAGCAGCAGAGAAATTATTACCAGCTTTCCGG
ACGAATACGAGTATGCCGTACGGCACGGTGAACTTCAAGTACGGAGTGCCGGAAGGTGAA
ACGCCGATCACGTGTACTGCTAGTGTGGGGACGTTCATATTGGAGTTCGGTGCGATCTCC
TATCTTACAGGTGACTACCGGTTCATCAAAGCTGCATCGGATGCGCTCGATGGTCTGTGG
ACAAGAAGGTCACAACTTGGCTTGCTTGGCAATCACATTAACGTCCAGACTGGTGCATGG
ACCGCGTTGGATTCGTGGGATAGGTGCGGGAATGGACTCATATT
>cap3_Contig339
CTCTTGTACATATATAAATTTCAAACTTGATTGTATGTTTTCTATAAATAATTATAAATT
TGTATATTTTCTATTCTTTATCTGAAAATTGAAAGTTTCTTTTTTGTAGAGGTCTGTATT
TGGCAAAGGTACTTTCGTTGATTATCAACAATTGTATCAACTTGTCGTCCTAGCTATCCT
AGATATTTTTGCGTATCGATCCACTCGTGTTTTTTTACATTTCACGGGAATTGTTTTTCG
CGTATCGATTAAAATACACTAGTCTTGTTTCAAAATAAGATACACTTCCCATTTGAATGC
TTTTTTTGTAGTCATTATTAATATTTGTTTAATACTTTGGAAGCCTCAAACCTAGATTTT
TAGGGTTAGGGACAATAGTTATCGAGGAAATGGGCAAAGAAAGGGGACCGACATTGATCT
TCG
>cap3_Contig340
GACGCGCGCTCTTCCTCGTTCCCAAACCTCGGCATTGCGTTGAATCGAAGTGATCAAACG
GGTGCGTACGCTGACAATCAATCCACGCGGGAATTAAGCGATAGTTTACCTCCTGAAAAA
TTCCCCACAGAAATCTCGCAATATTCACCTTCTCGGTCGCCGCGACTTCGCTACCTCGCC
ATTTGTCACGCTGGAATCCTCGCTGCGGCGATTTGTGGTATTGACATTCTCGACGCGTTA
GATAAAGACGCTGAATTGACGTTGAATCGCGAGAAAAAGATAGTATAAATACTCGCGATT
ACTCGCTTACACCGTCGAGTTATCATCGGCGTATGCAGTCTTCAAACGGAACGCTATGTT
CGTCAAATTCTATGGACATTTACGGCACTTATAGACGTCGCCGGGAAGACGAGGGACAAT
ACAATAGTAGACAACAAATCTATGATTTATCAACGGCCGATCTCTCACAATCGTCCGAAG
CGAACAATTCATTTACCGAACCTCCCCCATACTCTGAGCCGCCCTCGTAC
>cap3_Contig341
TTGCAGATCCTTGTGTGTATCATAAAGAAGGTGTTTTGATTTTGATTTGGGTAGATGACA
TAATAATTGCTTCTGACTCAGAAAATCAGATGGAGGAAATTATAAATCACTTAAAGAATA
AATTTAGAATGAAAGACTTGGGTCGGATTAATAACTTCATTGGAATACGTATTTGTCAGA
ATGACAATTCAATTGCCTTGGATCAGTCAATCTATCTAAGTAAGCTATTAAAAAATTGGT
ATGCAAGATTGGAAACCAAGACAAACCATTTCGTGAGCAAAAACCTACTAACCACAGAGT
AGTAACCTAACT
>cap3_Contig342
TACGTGGATTATTATTCCAAACTATGTTGTAAAATGACGTCTTTCGAAATTACGATAGTA
AAGCATACAACATTCTGTACAAGTAAACAAAGAAACTTATTAAGAAGAAAGCCAATTTGA
CCCATCCTTCGCGTTGACACCTGTTTAACTCCGATGTGTTCATTACTTCAGTTGGATCGT
AAATACCAACATTGCTCATTACAGGACGAGTTAAATATCTGTGTACGTTGTATGCAAGGA
GAGGGATGTTGAAAACAAGCATGATCCAATAACCACCAAATAAGAACATTAAATTGAGAA
ACATATGTAAGCCATATTCTGGAATAACAAGTGGGTTCAATGTGTTGCAAAGATCAATGG
GGTTTTTATAATCAGTTCGAAGATCATCAAATGCAATAACGTTCCAAATAACTAAAAATA
TCAACCCAATGCATATAAGCAGGGAAAGAATGAAGCAAAATACTTCAAAAGACATGATTT
ATGAAACGACTCAACCTAAATTAAGTTCAGAAAATGAGTGCAACAAGTCAGAAATATCAA
ATCAAGACGGATGCCTGCGTAGCGAATCC
>cap3_Contig343
TTTAACGAATCTAAGAATGAATATTAGTGAATATTACTAAATGTAAAAAACAGAAAAAAA
ACAATTAAAATCTAATCCTAAATTAAATTAAATTAAAATCTTTTACATTTTCATATTAGC
ATTCAATATGATTCAACTCTCTTTCAATTGACACTGTCACTTCTCAAAATCATAGTTATA
CTCCCTTATTTGAACAACCAAATTTGATCCTTCACTTCATCATGGCGATTGATTATCACT
TCGAACAATAAGGCAGTCGAATTTGCCACCGTAACTCGTCCATAACCATAATCTGTAATT
CGGACCAGGGACCATTTCTTCTTGTAAAATGGGTCAAGGTTGGCGCCCATCCCTGCATTC
CCCACTGTAATATGCGTGACGCCATTTTCGATGCATTCATTTTTATACAACTTGCATGTT
CGCTCATACGAATGGTAGTGGGCCCAGAATGCCATATCTACTTTGTACTTGTACAAAAGA
TCCTCAAACAATTCTTGCATGTGCTCAGCTACAACGTAGTCACTTGGAAATATTTGACTG
TTGTACATTGGTCTGTGTCCCCCGATGAACACCCATGGGGTTAACTTTCGATCGATACTC
TTCAATCGTTCTCCAGCCATACATATTGATCGGACCCAGGGGA
>cap3_Contig344
GCACTAATCAGTTCCATCCAAACATCTGGAACAGAGGTCGTTCTCACTCGACCGAATCCT
GAACGAGATGACATTCCATGCGAGTTGACGATGAAAGCGCACCGCGAGTCGGTTCAGTTC
TGTATCACCAACATCATGGTGATGAGTGAGTCGCGTCATATCGAACTCTACATCAACGAC
ATGTACGAGAAGACATTTAAAGGAACTGTGCTCAGTATGAAGATAGGAAAGAAACCTGCT
ATCTACGAAAGCCAATTAGATTTATCAGCACATGTCCAAGGAACGCAGAAAGTAACTTTA
AAGTTCCTCTCCCTCGGTGACAAAGAAAGCATGAGATTGCAAGGAATTGTTCTCACTATC
ATCGAATGTGCTAACCCTGGTATCCCATCAACACCCAAGAAGTCCTCGTCTGCAGA
>cap3_Contig345
ATGACTACGAAGCCCTTGGGAATTTCTACGACGAGGCACGTCTGGCTGATGGAGTCGAAA
TGATGTGTGGGATGATGACAATCATGACAGGGAAGTCTATGGCTGAGATCCGCCTGTTAG
ACGCTGGTTGTGGGACCGGAAACTATTCCCTTGGTTACCTCAAACATGGATTACGCAATT
TAAAGATGGTAGATGCTTCCGACACGATGTTACAAAACGCTCGTCGAAAAGTGGACGACT
ACAAGCAGTACGTCGACATCCAACAAATGGCTCTCCCAAACCTAGAACT
>cap3_Contig346
ATCTCCTGGGAATTGCAGGGACTATAAATGTGATTGTTGTTGACCCAATCCCTGGTAAAG
TCAGGGCTATCGTGCAGGTTAATGGTTTGAAACCTGTCAAAGTAACAACAAAATTAATCA
CTTTCTCACAAGTTGGTTTAACTTTACCCAAATGCAATGTGGAAAGAATGGTATATCTGG
AACCGTCATCTATAAGATTCGATTGGCTAATGGTAATAACATCGGTAAAAAACAGTTGGT
ATATAAATTCATCAATTCAAAATGTCTCAAGAAGGGTGGTGATGTTACTGGAAGTTGCTG
TAGTGGTGGCGGTATTCCCAAAAATCCAGCCAAGGGAGCAACAAAGCCAGCTACGAAAAC
ACCAAGCAGAAAAACAGCTGCATTGGGACCCACTGATCTTGCAGCAAAATACCCAGTCTT
GCCAAGAATATACAACATCAAAGTAGCTATTACTCCAAAATCTGTTCCAGAGAAAACAAG
TGGAGTTTTACC
>cap3_Contig347
TGGATACTGGGTATCATATTATAAATGCGAAGTGTGAGTGTTTTGTTGTACAAGTTTAGG
CGTGGGTACCGCAATCATTCGAGTTATCTACTGTCTGCTGTCGTCTTTTTATTTTTTGAC
AGAAAAAGAGTAAAATACAAAGAACTTTTCTCAGATTTTATCAAATCATGTCACCAAGAA
AAGATGTTCTAATTCCGAAGCGTGGTACGCCATTGCTTGCACAACTAACACTTTAGCTGC
CATGATTAGGATAATATGTTTTGACAATTTCTACGCTGTGTATAAGTTTGTAAAGCTTAA
ATAGTTGTGTACTTCGAGTGTTTTAGTTGCATGCTGGTTCATGGAAATTTGTTCTTTTTT
CTTTCTCATTGAAGACAGGACATTTAGTTAGTTGTCTTTTTTGTTAATTTGACTTGAGGC
CAGGTTAAAATTGAATTTAGATTAAATTCGAGTACAGTTACATACAAAGCAAATCATGGG
GACTCTCTCTTTAGTGAACGTGGTCAATGGCTGAAATGCATCATACAACACGCTATA
>cap3_Contig348
GTTGAAATTGAAAATGAATAGAAACTTTAAGACAGCTTTCACCTTTTTGCAAGCGCAATT
TTGAAACCAACCACTGTTCACTGAATTAGAATATAAAATAGGGTACACTTGTATTGAGGT
AAGGAACACCAAATTCATTATTTTCCCGTCTTTCTTTAAAAGGTATATGTTGTGATGCAA
CACATGGCACTACAGGCTATGATTTCAAATTAACGTCCCTACTAACGATTGACGATTTTG
GAGAAGGATTCCCGATTGCTTGGTGTCTTTCTAACAAAGAAGATTATGTTTCTATGAAAG
TATTCTTGGAGGAACTAAAAAGCTCACAACGGTAATTTGAAACATCCATTTGTACTTTAA
GGTGAAATTTCCATTCAAGAACTAAAAAGGAAGTGTAAATTTTGGCATTGACAACAAATA
AAATAGCATTAAATCTCCCGAAATTATGCAGTCAAGTTATTAATTTTAATTGGCTGATTC
AGACTTGAAAGTTATTGAATCAAAGTTCTCAAATGGAAAATCCACTTTTATGATCAAGTT
ATTATTATTTACAAATC
>cap3_Contig349
CATCAGCATTAGTTCAACACTTGTCTCAACAAGCTACAACAACTGCAACAACATCAGCAC
TAGTTCAGCAACAAGGTCCTCAACTATCTACAACAACATCTGTAACATCATCCACGCCGA
GAAATGCTGCTGAATTACGTTTACGACTTTGGGCGTTGATATCAATATTCCAAGAGGTAC
TTTTAAACATTTTGAAGAGCCAGTCGCAAATAGAGTTGAGAAATGAAAATCAAGCTATGT
TAAAAAACTCTTGATGTATCATGTTCTATCAAAAAAATAGAAGAGCAAAAGATCAACTTA
GGCATAATGAGCATCTTATCAAAGAAAATAATACACTTCGAAAATCAATCGATCTATGCG
CGTTTGATGTAACATTACTTGTGGCATTGATAAAAAATGTAAACCGGACGAACTGTTTTA
ACGATTTTAGAAATATTTGCAACAACACGTCATGCACTGATTGTTTTGTGAAAGTTGCTG
TAGAAGATATCAGAAAATTACGAAACAGCGCAGCACATGAGACTGATTATCAATTGGAGG
GATTTTTAAACCAAACTCGACAATTTCATGACTTTCCCGGCCTTGGAACCTTCAAGATAT
TTATGGAACACTTTGAAAAACAATTTCATATTTTACATACGCATATAAGTGATGCCAAGA
AATTTCCACTGTCATCACTTTTTGGCGGACCAATTACTGGAAACACACTCGAAGAAAAAT
TCCATTCTGTTCGTGATTCCCCTCATGAAGATGTTATTAATTCTATCAATATCTT
>cap3_Contig350
GTTTTGTTCTGGTAATCCCAAATCTTTACTGAACGATCATCAGCACCAGATACTAAATAT
GGTTTTTCTCCTCCATGGAAGTAATCGACACAGTTGACACCTTTTTCGTGGCCTTCAAGA
GTAAAGTTAGGATGAGATGATCCTAACTGCCACACCTTGATAGATCTATCAAGTGAGGCA
CTAGCAAATTGATTGTTGTCTTTAGGGTTGATGACGATTTGCATAACATAGTGAGTATGA
CCTTCAAATGTCTGAATACAACTCCATTTCTTATCCCAATCCCATAATTTAATGCTCATG
TCGTCACTGCTGGATAAAAGATATGGTTGAGTTGGATGTACTTGTAAGCATCGAAGATAA
TCTGAATGAGCTTCAAATCCATGAATCTTTTCAAGTGTATTGTAGTTGAAAACACGAATC
ATCATGTCGTCTGAACCAGTAACGATCCAATTCTTTCTTGCAACAAACTGACCACATCTC
ACTGGCAAATCTGTGACCTCGAAAGACTTGATTAATGTTTGACTAGTATGGTTCCAAACA
TGACAGTTTCCATTGTATAAACATACCAACATCCATGGTTCAGTTGGATGAAGGTCTACA
GATTTAGCTCTATCTGATCGAGCAGATAAGGTTCTCTTGACATCTAACCTCAAAGGCATT
GCGTTTTGAATATGGCTGGGTAGTTAGATAAGTTATTAAATTTTATGTCCTCACAGCAAA
TTGTACGCGGCCAGCT
>cap3_Contig351
CGCTTGTGGATGGCGAGCACTACAACTCTGAAACCATCACCAATAGGATGCAGGCTGTAA
TGAAAAGATGGATCACATTGAAAGAAGCACTTGTCGAGAGACGTTCAAAACTCGGTGAAT
CTCAATCGTTACAATCTGTTAGTCGTGATGTCGACGATATTGAGGCGTGGATCAGTGAAA
AGCTGCAAACAGCCATGGACGAGTCTTATAAAGNTCCATCCAATATTCAGGGTAAGTGCA
AAAGCATCAAGCCTTAGAAGCAGAGGTTGCAGCTAATAAGGATCGTGTTCTTGGTACTAT
CAACGTGGGAAGGGGCTTGATCGAACAAAACAAGTGACCAAGGAAC
>cap3_Contig352
ACTGGGAATTCATCCATTCAGTTATTTCTTTATGCAGTTAGGAACATCATGCTTCAAGAT
ATTGTACTGGAACGTAATAGCAAACTTTTTCTTTCCATTAGAATCATCTGCAAAAGCTGT
AGAGTTGAATCCACGATTTTCAATCACAATTGGTTGGCCTCTAACATAAATATTGTAACA
TCTTGGCCCCCACACAGATCCCTGTGGAGCACCATATTTGACTTCTAAACTCTCAGAATA
TTGTCCATTTATTTTCACTCTCTGTGTCCTATTCGTCAAAAATGATCGGCACCATTTAAG
AGATGTTCCGGTCAATCCAATTTCGTCTGATAATATATTAAGCAGTATTTCGATGTCGAT
TGTATCAAACGCTGCCGAGAGATCTAGAAATATCATGACAGTGCATTTATTTTCATCGAA
TCCTTTGAGTACATCACCTAC
>cap3_Contig353
TTTATTTTCGTTGCGTCGCATTACACTTTTCTCCTTATCAACCATTCATTTTTACACGTA
TGCTTCGTGGATTATATGAGGTTCTGCACAAATAACACCTTAATCGTAGTTGATTTTGAT
TGTTGTCAGCCATCATTTGTTGATACCTTGCAGATGGTTTTAAATGGTTGTAATTTTTTT
AATGATCAACAGACAGCAAAACAAATTTCTGAACTCCTTTTTTATAAACCAATTAGTTAG
CTAGCTAGCACTTAATATATCTTTTGCTTTACTTGAGTATATATCTTCGACATCACAATA
CTCGTTA
>cap3_Contig354
TCCAAAGACGAGTGATTTTAACACAACGCTCGACGTCGATGGACTTATTCAAACACCGGA
TGGAGGAGGTCTGGATCTAGACATGGATCAACTAGGTGTCACTACACTTGGAAAAGATGA
TGCGCTACGACTAAGTAATATCATAGAGCATGGCACATCGAGACCTATCATTCCCTTATT
TAACTCTTCACTCACCGATGGAAATAGTTTGGAATCGCTCGTAGCAACCGACCCCATGAG
CACCCCCGATGAAGGGAAGCGTGTTCAGGAATTCGAAGGAAGGTTGAAGTATGCTCTCGA
ACAGAGTCTGATGTTACAAATGAAACAAATGCAGAATATAGATCTGCTGGAGAAGGATAT
CAAAGATGCTTTGAGTGCAGAAGGACTTGTCTCGTTAGATGTGTTTAATGAAATTCCTGC
CAAGATGAGAAGTTCGAAGAAGAAATTGAAAAGTATTTTGAAAAACCGAAACAGTGTAAA
GATTAATTCTGACAACAACGGATCAGC
>cap3_Contig355
GAAATATATAGTTGTCATTACAAAATTACTTTTGAAACTTTAACCCGCTAAATGGGTTAA
CCACTGACTCATTAATTCTTCAAGTTGAAAATTGTGTATGCATTCAATGTAAAAGGGTGG
GGTATGTTTTTCGTTTCTGTATCAATGTCCCATTTATGACTAATGTCTTCTTTGTGAATT
CAGACAACATTTTTAAGTTCGATGACAAGCAGGTCAGTTGGTTTGTTAAGACTGAAAAAT
GGAAGTTTAAGCTGTATTTATACTTATATACTTATATATTCAAGAAAAAGGACGAAACGT
GTAGATATTGAACTTTTGTTGAAGTTGAAGAAAGTTTAATCTAGCTCACAAAGGATTTAT
ATGTTGTCCTTTATCCAAGTGATTTTGAATGTTCGAATCTTCACTAGTATTAGCAAAGTT
T
>cap3_Contig356
GTTTCATACGACCAATTTCATAATACCTGCATGTTGTGTCCATCTCTAACGAAGACATCA
TCCCGCCATTTTCAATAACAGCGATCACTTGATCAGTTGGATTGGGTTTTAAATCAAAGA
TTGTTTTCTTGACATCAAATGTATTGATGGGTGAAAAATCATAGGCATCAAATGTCCGGA
AAGAGGATTCATACGGTCCAAGCATACCACTATG
>cap3_Contig357
TTAAATAAAAGATATACTAGAAAAAGCGCTAGATAATAAATAAGAAAGGTTTCGGGATCT
TCATTTAGATGCCTTCAAATGATTGGGCTTTCGCTTTGAACTCAGCTCTTCGCTTTCTTC
TCGCCTCTTCGTCGTTTTTACGCTCTTCCTGTTCTTGTCGGATCTCATCTTCGAACTTAC
TCGACTTGCTGACATCTTTGATCTTTGCTTCGAAAAAGTCTTTAGCACCTAACACGCCAG
TTTCGTCGACATCAATTTCTGAAAGTCTTGCAAGAGTAGACAATCCTTCACACAATGGTT
CCCCATCAGCAGCTTTTCGGAAGATTAACAAGAACTCTCTGAAACTGATTTCTCCATCCG
CATCTTCATCAACTTCTTTTATCATTTGTTTTAAAGCAATGTACGTTTGAGGAGCTTCAA
GCTTTTCCATCATGATTTGAAGTTCATTTTGGTCGAGAAATTTACTTTCATCCGTATCGT
ATTTTTTGAATAGACTTTCATACTCTTTGATTTGCTTCCGAGTAAATTCGTGAAATTCGG
TATATATATTTTTAGGTGCATTTACAAACTGAGGTTCAGCCTCTCCTTCATTTACTTTAT
TTCTATGGGCAAGCTTTTCAGCTAATTCACTCATGTTGCTTGCCCACACTAATGTACTAA
AAACAGCTACTTGTTATGAGTTAAAACTTGAATGTTGAAAGTTAAACCGGC
>cap3_Contig358
TTTTGAATAACAGTTGAGCAAGCTGTGCTCTTGAAGCCCGTCTCTCCGACGCCCTGTCGG
TACACGTCTGGTACAGCGTCGTATTAAATCCCTTCATTTTCCGACACTGGAACGTTTGGA
AAGTCCGACGTAATTCTGCATCGAGCGCACGGAACACTTGCAAGCGGGCCTCACTAAAGA
TGTCGAGGACTGAGCGGCCCGTAGGTTGGTTCTCGTCGAGGAAGTCGTCTTTAAGCATGC
GCATACTCTTGTAATCTTTGTTACTGAAGCAGGCAACTTCTTTCGCATCTCGATCCCAGA
ATCCATTGCTTCGGTGGATTTCGACAAATGTCGGTTTCGGTTTTGTGTTGTAAACGAGTT
GGGGGTCGTACTCGGCGAACGGGATCGGGAAGAAGACCTGAACTCCACTCACTGCATTCA
CTCGACACCTGTTACAAGAAGTTCGTCGTGAAGTAAGTATTGATA
>cap3_Contig359
TTTAGACGTGGTATGTCATTAGATTTGATAAATAAGCTTCGACTCCGTAATCAACGCGTG
GTGAAAGGTGTCCCCCGGCAGTTGGTGGAACATAATGAACTAATGTTTAGAGGGAAATCA
CCGGTTGAAGAACATCCCACTGACCCTATCCCCAACACGTTAATGGCATCGTTTAATACC
GATACTTCTCTCGATACCACACCCGATAAACCAAACGAGGACGAGTTGACTGGTTTAGAA
GATGACTCGAAACTAGAAAAACTAAACCGCGCACTCGTCGAATCGAATAAAAACGATATC
ATGCGGTTAGAGGGAAAATTAATTTGATCAAAACTTTACACAGACTTGAAGAGTCGCGCC
GAAAACATCAACAATACGCAGCGCTGTTAAAGGCGGGAAAAATCACGAATTATGATTGGA
TGTTTCAACACAGACGCTCCAATGATCTTTCTCCGATGAAATCGTTACAGTTGGTGGCTG
ATAGTAAAAGTAAAGTAAGTGGTGTACCTCGTTTAGACAGAAACCGATTTGCAGAAGGAA
TCCTCCAGCGACTAGCCAATCTACCACC
>cap3_Contig360
CCTCTCTTCACAACTTCTATGGACATCATGATCGTCACAATTCACCTGAACAGATTGGTT
TTTAAATTCAGTGATTAAATCTCCTTCACTACTAGAGATCGAATTCGGTTGTAAGTGAGC
AGATTTTAATGTCTCCATCCATAGCAGGGATGAATTCATATCTGGAATTTCTGATGGATC
TTTAAAAATGTATAGGTAGTGTTTTCCAATTGATATAAGCTGCCCGCTGATCAGAATAGT
CTCTTTAAAAATCATTTTGCCATCAACAGTTACATCAGCATTTTCTTTGGGTTCAATGTA
AACATCTAGTTTAGCTTCATCGATGTTTGTCTCGTGCTCAATATTCCTTACTTTCTTGTA
AATTGATGCAACAACCTTCGATAAAGTAGGCGAATGAAGTATGATATCACATTGATTACC
AGATTGTTTGTTGAAATAACCAACAGTTGTAATTCT
>cap3_Contig361
GTACTGTTTAAATTGTCTTGGCATCTTCTAATGCTTCGTGTGCACGGTCAATAGCTCTGT
TTGCAGCTTCGATGTATTCTCCTTCATCTTCATGTTGAATATTTCCTCTTGGTTGTCCTT
TCATCGTATCAATCATTGAAGCATCTGAAACAGATGGGACGATATCTGGATAGCCACCAA
GTGCAGCTAAGTTATCCATGGCTTTTTCAGCAACATTTACAGCAGCTCCAGCAGCAGCCT
CGTATATTTTACCAAGACCTTCACTTCTTTCATTTGGGGCTAATGGTGAATATTTAGGTG
CTGGTAAGGTACCAAATCCAGCTGCAACGGATGCTTTTGACAATGCTCTGTGTGCAGCAT
CAACAGCATGTTGGGCTTCTTTCAAATACGGTGGACCATTTTGATCTATTGACTAGCAGC
TCTTGTCTTGTTTTTTGCTTTCTTGGATTGCAGATCTGCAGCATCAGCAACAGCTT
>cap3_Contig362
GGAAGAAGAAAAAGGAAGAGTAAGGAAGGAGGAGAAGAACTGACTGACTGACAAGTCGAT
GTGTTGTTGATGCTTGTCTTATAAAAACGTTAGTAAAACGAATATAAAAGAAGAAAACAG
TTCGCATTGACTGATTAGTCTTCAGATAAATCATAAAGTTGAAATAAATAAATAAATCTT
ATGAACTGACGAAGTGGTTTCTTTGTCGCTGGTCTTAATGATAAAACGATAAAAGAAGAA
AACAGGAATTTCATAGGCTGACTAATTGTATTCTAATGCTGGGTCTTTAAACAATTGCGG
GATAAAGATAAAAAGAAAAGAATTGTTTTATGACTGACTGGTTTTATATTTTTGACGGGT
CTCAAATCAAATCAATCTGAAACACAAGGTAAAGAGAACACTGTACTATACTTATAAAAA
TGTTTAATGAAAAAATCATAAAAATATTGTAGAGAAAGAAAGCAAGAAGAAAGATAAAAA
TACGGTGGAAAGAGTGTTAATTTGTGCTCTATTGTTAAAACT
>cap3_Contig363
TTTCTTGGGTCGATAATGCACTAACAAATACAGCGGACATAAGCAGTTCCTTAGCTTTTT
CTAAAAACAATCCTCTTCTCTGGCACCCCATTTCCTATTTTTCATCCTTACGCAATAGTT
TATGTAGTGGCTCCAGAAGATTGGCTACGTTCCGCAGATTTTTGAATTTGCTTTCCAAGT
CTCTTCCCCCAACCATGTCATCTACCCTGACCACGGTATTCTCAATCCCTTTTAATCGAT
TTTCGATTGCCCTTTGGAAAATTCCTGTCGCAGATTTAAACCCCAAAACATAAACGGGTC
GGTCGAAATAATCCTTTGTGTGTATTCAAGGTTAAAATAATGTTTTGAATCTTCATCCAA
TTCCATCTGTTGATACGCGTGTTTAAAATCAAGTTTTGAAAAAAAAAACACACCCTGACA
TCTCACTAAACAAATCGTCAATTTTTGGAATTGGATAGTTATCGAGTTTAGACGCTTGAT
TCACAGTTATTTTATAATAACCACACAGACGAACAGAATTATCAGGCTTTCTTACGGGAA
CAATGGGAGTAGCCCAATCAGAGACATCAACAGGCTCCAAAATACCGGCGTGAATCATCC
TCTCGAGCTCACATTCAACTTTTTGTTTTAACGCATAGGGAACTGTACGTGCTTTGCAAA
ATTTAGGGATTGCATTATCGTTTAAATAAATTTTAGCTTTCTCACCTTTAAGCAAGCCCA
AGTCATTTCCAAATATATAATCAAATTCTTGCATTAAATCCTTCAATCGATCACTTCGGT
TGTTATTTACTTAATATCAGTGACTAAAGTTTGATATTTTTATTTGT
>cap3_Contig364
GTTGACAGTGACGTTGGAGAGAGATTCTTTGATTTCATTTTCCAAAGCTTTCTTACCACG
GGTATCACTTGCATTCATTTCAATGAACGAAAACCCCAATTCCTGACAACATAATGTTGC
TGTAGTCGTCTTTCCAACACCTGGTGGTCCCGATAACAATGCAGCTTTAAAGATTGAACC
ATCATCTTTTCCAGAATGAAAGTTTTTCTTAACACCTGAGGCATTATTTGCTTTCCAATT
GAGAAGCCATTTCTTTAATTTGTTCATATTACTTTTGTCACCTTGCTGTCCAACGATTTG
CTTCATTGTTTTAGGCTTGTATTTATCAACCCATAATAATGATGGCCCAGCATCTTTTCG
TATAGTTGGTGATTGTGTATTGGGGGTAGAGCATTTTGAGCTTGAATTGGAGGATATTGA
TGGAGAGCTTTTAATTGAGGGAGATTTTTTAATTGATGACATTGATGGACTGCTAGATGA
AGCACCTTTAAGTCGGTCAAGGACTGCTTTTGCATCCTGTTTCTTCGGACTTTTTGATTC
TTTTTTTATCTTAGGTGAGGCTGAAACTGCAGGACTTTTCTTCTTTACAAACTCTATGAA
TCCATCCTCATCTAATCTCGTAGTGTTATGTTTTTCTGCCTTAGCAATTTTTGATTCTCC
AGGCTCATTCCCAACAATCAAGTAACTAGTCTTCCCACTCACTGATCCTGTCACCTTACC
ACCATACCTCTGAATATAATCTTGAAATTCTTCCCTTTCAAAAGTCTTCTAATACACCAG
TAATAACGAAAGTTAA
>cap3_Contig365
AAGATTACTGCTCGTGCTTTTGATTTCAAATGGCCTGGTGCAATCCAAACAAAGTTTGCA
GGTGCCTACACGATGATTGGTAACAGTATAGCTGGTAGCGAGAAGGTCGGGTTAATAACC
AAGGGTGTCCCATGTGATGATATGACTGCACAGAACAGAATACGGGATAATGAGATACAC
TCTTGCGCGCATGGTATTCACTTCAAAGGCCCATCTGACCACTGTTGGAAAGCGGAACAT
TTTGTGATATGGAAAAATTTGGATTATGGATTTTATGTATGGATCAACAAAAACATTGTT
GTTACGAACACTATCATGGCGGATAACAAAGTCAGCTTCTTTTTGAACGGGTTTGGACCC
GGTCCCTTGTCTCACCGGTCTAGAAAGAGCGTGATCACTATACGAGATTCATTAGTCATC
GGTCGCTCTTCGAATTTCGACTGTACTAATGATGATTTTGTTCCATGGCATCTAGCTCAA
GTCGGAAAGAGATCATCAAGAGCA
>cap3_Contig366
GAAACACCGAAGAGTAGAACGGCGTCTGTCGCTTCAAAAACAAAGACGGACAAAGATGCG
AAACCGTCTGGAATCGCTAAACCGTCCAGTGCTACCAGTAGTACGTCCGCTTCTGCATCC
GCTGAAGGGACAAAGCCCCGCGGGGGAGTCTTTGAACGCCTTGCTGCCCAGGGCACCGCC
ACCCGCCGTGCCTCATCCGCAAAGGACGCTGGGAAGAAGGCATCTACTGCTACTAAAAGA
AGTGCACCAAAGTAAATGAAGAACTCTTCCTTTAGAAAAAGAAAAATTTGAAATCTTTAT
TTCTTTGCTACATCTAAAACTAAACTGTTAGTTCTATAATATACTTCATATCTTGGCAAT
AATATATATAAACTTTAAATTTATTAAAGAAAAAGAAGATTTATAAGATTTATATATTGT
AAATTTATGGAAATAAAGACTATTGCCATGGGATAACACTAAACATTTTATATTTTCAGA
TTTTATTTATTTCTTTATCTATCTGTCAGTCGTATATATGAAGTTTTTCCGTTCTAAAAC
GCATTATGGATTGGCGCAATCTTTTAGTCTCAAGAATTAAAGGAATTGTTTTG
>cap3_Contig367
TCCTCTTTGTTGTTGATTTGTCTAACAAACGAATCTGCATAATGAAAACATGTCTCCCAT
ACCTTCTTCTTTTTATCAACGGACTCTTGTGAAGGTTTCACAACACAGTCAGAGAAACTA
GCTTTTAAATTTTGAAGAGTTTTTGCTTGATACTCAATTTGTTCTGCAAATTTGTTGATA
AACTTAACAATCGATTCACTAGCCGAGTTTGTCTTATTTTTAGTTACTTCAGATATTCTT
TTATTAATGAAATCAACAACGGAGAGAAGTTCACCAGATGCAACACTGTGAATGTTTCCA
ACTTTTTCAATTACTTCTAATAAGAGTTTATGTAGTTTCGTAAACAATTGTAAATATTCA
TTTATGTTTTCAGATAGTTGTGGGGGGACAAGGGGAATCCGACTGTTTAATTAAAACAAA
GCATTGCGATGGTCGGAAACGATGTTGACGCAATGTGATTTCTGCCCAGTGCTCTGAATG
TCAAAGTGAAGAAATTCAACCAAGCGCGGGTAAACGGCGGGAGTAACTATGACTCTCTTA
AGGTAGCCAAATGCCTCGTCATCTAATTAGTGACGCGCATGAATGGATTAACGAGATTCC
CACTGTCCCTATCTACTATCTAGCGAAACCACAGCCAAGGGAACGGGCTTGGCAAAATCA
GCGGGGAAAGAAGACCCTGTTGAGCTTGACTCTAGTCTGACTTTGTGAAAAAACAGGAGA
TGTTATCACCGCTACACCAAGCAAGATTTTTATAAATGGCGGAGTTGTGAAAAAAACGAT
TACGATTGGAAATAAGGAATTTGTGGACTACGTTGATGTCGGAAATATTCATTATCTTGT
GAATGTTGATGATATTAGTAAGATACAGAGTGATATTATCCCAAGATCGTTGATCAGTAA
TACTCCTAACAATCCAGATCTATCTCCAACACCAACTCCAGCAAG
>cap3_Contig368
ATTCATTAAATTTTGCCAGACAAATAATTTTTAATAAAGGTTATGATCAATCATATCTAT
CTGGCTTTTAGGTTTTTGAATTTTCTAAATCTGGAATCATTTAAATCAGATATAAATAAT
GTCAGATATAAAAGAAATGTGCTCATGTACAGCAAAGTTTAGAAAGAATCTAACTAATCT
TTGACAAGATCATATTGTACGAACTGTTTTAATCTTTCTAAATACTGTCCGTAAAGTTCA
ACATCGTTATGACCAGCACCTTCAACCCATAAAGGTTCAACAGCCTTTGGAGACTTGTCA
TAAATGGCAATTCCATGAGAGAAATCAATCACCTCATCTTCAGTTCCATGGATGACCAAA
ACAGGTGAGGTAATCTTCTGGGTTTTTTCAATGCTAAAAAAAAAAATTATAATTCCAAAA
AACGTTGTCACAATATTTCACAGAACCTTTCTAGTATACTATAAAATAATGCTATCGCAT
TTATATAATGACAAACAAGTATGACAAACATGTTGTACTAAATTGGGCCCACACATCTCA
GATCAAGTGTAATATTATGCACAAACAAGCAATTCATTGATAATCAAATAGTGATATTGT
AATTAACTAAAACAATTAGAATGTGCATTATTACATAACTACTCGGGCTGTACTGTGG
>cap3_Contig369
GGGGGTTGGTGCCAGTCAGCGAGAGGCAATCCGTTATATCAGCATGGTGGTGGGTATATA
ATGGAAAATGCCATGCATAGCACGCATAACATTCAGTTATTAAAGAATCATTTTCATAAC
GGGCTATTCTCAAAACTTTGTCTAATTTAGACTACTAATTGGTTAGATTGTGGAAAAAAA
ACACTAGAATTTCATTTCGTTTTTAAGACTTTGCCGATGTTTCAGCTTAAAAAACTTAAA
TATCTAAATACTTAATAAAACAAAGGAAAACATTAACAACGATGAAAACAAACCAACCTG
GTACCTTGTTGTTGAAGGGATTGTCTAAAATTTACAGGTAAATTAACTGTTTGATTGGTC
GAAAGTTACATCACCACGAATCCGATTGGTTCATTTAGAAATGTCATCATATGATATTTT
ATCAAAATTAAATGGAATGAAATTTTCTTAATAAACCAATCAGATTCTTGAAGATGTAAT
TTACAACCAATCAAACTGACAACACACACTCACACACACAATGAAGTGACCATACAACAA
CT
>cap3_Contig370
GTTCAATTCAAGAAAAGTACCAATTAAAATCGAAAATCATTACGAATATCCGATTGTAAT
TTCAAATGATGTAAAATCATTCTTCGAACATAATATCCCTCCAATTATTCATGATACAGA
CTCTATAGACAAGATTGTTAACAAGTTCGATCGTATTGTAACTGAAGTATTGACAAATAA
TGAGAAGAATACCACAAGTTTGAAACTTTCTCCGTGGGGGAACAAGAAAGATGGAAGAGA
CTCCTTCAAAAGAACGATCTGAGCAAAATTTGAAAGCCATTGGCTGGGATGGAAATATTG
AGGAGAATGAAGTC
>cap3_Contig371
GATCCCGTCGCATCATAAATTCGAGAGTCTCGGTCACAATGTCGAACCGGAGTTACTTTC
GATTATCGAATCAAATAATCAGCAGGTGACGTCGTTGTCACATGAGGTGAAGAACATTGA
AAGCCGATTGGGTAATGTCGAGTCCATTGTTGAAGTGTTGGAGAAAGCTGTTTACAGAAT
TGAAGAGAAAGTTGATAAACTCAATAGCCCTGTTCCAACTTTCACGCAGAGAGAAGAATT
TGCTGAAGAACCTGCCCCTCCCCTCCCCGTGCACGCCACCCTCTTCTCAAACAATACTTC
GTGCCCATGACTTCAGCAAACGCATTCGACAGTGGTGCTCCAGGTGGTGGGATCAAAGAG
TTGGACCGCAACCCAAACAACGGAGGATTACCATGGCCGGTTAACAAGATGGTATCCTAT
CTGTTACAAGAATACAGAAAGGGAGAATAAACAAACTTTAATGCAACTTCAAGGAACCCC
TNACGTT
>cap3_Contig372
GTCTCATCCGTGACCTGCTCACTGAAATCCTTCCTCACCTCTACAATGAAACCAAAGTCA
GAAGAGAATTAATTCGAGAAGTTGAAATGGGACCATTTAAACACACAGTAGATGATGGAC
TAGATATTCGAAAGGCTGCATTTGAATGCATGTACACATTACTCGACTCCTGTTTAGACA
GGTTAGATATATTCGAATTCTTGAACCACGTGGAGGATGGCTTGAAAGATCACTACGATA
TTAAGATGTTAACGTATCTTATGTTAGTTCGACTATCAAGTTTATGTCCTAACGCTGTTC
TTCAGAGTAAGTAATGATTGTCAAATATCGGCTATTTTAGCCATTTGATTGGTCGGAAAT
TACAGCATCATGGAACTTATTGGTTTATTTAAAATGTCACAATTTGATGTTTTGTTTATC
AGAAAAATATAAACGCTTCTGCACGAATCAATCAATCAGTATCTTGATGATGTAATTTCC
AACCAATCAAAAGCAGTATACGAG
>cap3_Contig373
CTAACTAGAGACCAATCACGTCAACTGCTACAGCAAATTCCAAATTCGAATGCTCGTCGA
TTTAACAGAGCATCTTTCCAGCGTGTTGATGATGTCCCTAGCCTCTTTCTCGATGAAGAA
CTGAANAGGGGGGAATTTCTCATTCCGTCTTGTTCTTCCCGAGTAGGGTGATTCCCTCAT
CCACGACCTCCTCGACAATACATCGTGGTAACCACCCTTTGACACGAGTTGGTTCGCCGA
GAACAGGTATGGGAGTTTTATCTTTGGCAACGTGTTTCTGACCATACACCCAATGTTTTC
TGATCCGTGTTGCGTGTATGACGTCACCCACTTCCACAGGTATCCTCTGCTCTTCAGACC
ACGGTGCAGAGTAGCACGTTCTCAAACCGAGAGAGATGGGAAACCAAGAACCAGTATATC
TTCTCTTGATTTCATAAATTATCATTCTATCTTTTTTTATTTCTTTTTGCTCCAACTGTT
CAATAGTCAGAGTATATTCATCTAAACCTTCAAAGACAGGCCAAC
>cap3_Contig374
GAGATATTGAATTTTAAAAATCTAAAAATCTACCATTTTAACTAAATAATGACCAAAATT
AGCCAAATGTTTGAAAATATCCAAACAGACTTCAGATTCTGATTCCACACCCAAAAAAAT
ACTAGTTGGTGGTCTTTGTGAATTCAGTGATCGAATATTTAAAGTTTCAACAAAAAAAAT
CAGCAATTTTTGGCTAAAAATGAAATTTCGAGGTCAATTTTCTTAAAATAGCATTTTTTC
CTGAAACATCAGTTTCACTCAAATCGAAGGTCATATTTAGTACTAACTTCAGGCCGCAAT
TGAAGAAACTCTTTTTGAGATATTTGTGAGCAAATTGACAGAGTCTGACTTTGAGCTATT
TTGACTATTTAAGTGCCAAAATAGCCAATATGAGAATTTTATTGACAGAGTCCGATTTGA
GCTATTTGACTATTTAAG
>cap3_Contig375
ATGATCTAGTATCTTCTTCTAAATACTTACATCTAGTCATTTAATTCCTTCTGAGAAACA
TCCAGAATTTTCAGTATTTGATTCATGTTGATTTAGTAGCCTTCTTCCGATAACCATGTG
TGATGGTGTCAAAGCTTCGTCCACCTCCTCAGTAAGACAAGTCAAGGGTCTACTATTTAT
CACAGCTTCAACTTCCACAAGAACTGTCTCCATCTCCTCATAACTCAACTTGGCATTACC
TAAACATTTTTTCAAGGCATCTTTCACAATCCGTATCAATCTTTCGTAAAATGCACCCCA
CCATGGCGACTTATCTAATATATGTTTCCACTTTATACCTCTACTTGTCAAGAATTCATG
TAATTCTTTCCCAATAAAGGTCTTGAAGTTGTCACTCACTGCCATGTTAAATGTTCCACG
TCTCCCAATGAATCTATTAAGTAATCTGATTAAAC
>cap3_Contig376
GCGGTGTTGTGAAGAGTATCGACGCAAGTAAAACGCTTTACCAGTGGTTCAGTTTGCAGA
CGGCCTTACCCTTCCCATCAAGCGTGAAGCGTTCCATTACAAAACACTTGCAGGGATCTC
CACTCGCATGCAGATTCCACTCAAACTGGCATGGGCAATATCTATTCACAAAAGTCAGGG
TTTGACGTTGGACTGTTGTGAAGTGTCGTTATCACGTGTGTTTGAGCACGGGCAAGCATA
CGTTGCTTTGTCACGTGCAAAAAGTTTAGAAGGACTTCGTGTGTTGGATATGTCGCCCGA
CTGTGTGAAAGCCGACATCGACGTGTTAAACTTTTACGTCAAGTTGCGACGAGAGCTCCG
AATGATGTCGTTCGAGAAAAATGGTGAAGACGACAGGTAACCTTTATTGTCGTGCGAGGT
AACCTTGCATTGAATCAAGGTTGCCTTTTGGGATCCAGCATTGTGATTCTTGAGGTGAAG
ATTATATTTGTTTTGTTGTAATTTAAAACTGTTGACAAAAGATAATTTGGAAAAAATATT
TTTAGATTTACGTATGATATAGACATTTTTAGTCGTTACAATCGGTCTTGTTTGTAATGC
CTTATTTTATCCAAACTTATATGAATATGTTGAATTGAGATGTTCGTCTAAAGCTGAAAA
TACGACTTATGCGTTTAGCATAGAATCTTATATTCGAAATGATATATAGTTGGTGCTCTT
GTATCAAAAGTACCGAAAAGGTTTTATTTATTATAGAGGTCGAGTATTATGATGTTCAAC
GGTATA
>cap3_Contig377
GAAAGATGAGAATTTGCTACTTCTTCATCTTTCTTAAAAGATCTACAGTTCGAGTTGGAG
TCTGGAGAGGTGGAAAGAAAGATGAAGAAGTAGCAAATTCTCAGAACGCAGGAATCTGGA
GAGGAGGGAAAAAAGACGAAGTAAGTACCAACGATGAAGCTAACATTAATAAAAACGGAA
AAGGAAAACTTAAGAATGCTGGATGGCGGGGTGGAAAAAGAGATGAAATCAGCGACAATT
CACAAGGAGCTGGTGTATGGAGGGGAGGAAAGAGAGATGCAGGAAATGATTTGAAGAATT
CTGGATGGCGGAATGGAAAAAAGATGAAATCAGTGACAATTCCCAAGGAGCTGGTGTATG
GAAAGGAAGCAGGAGAGATGCCGGCAACGATCTGAAATATTCCGGATGGAGGGGCGGCAA
ACGAGATGAACAAATCTCTGATACATCTAACAGCGATAAACAGTTAAAAGAAGAAATTAC
TTCGTTACTCGACAGCTTACTGAAGAAGAATGGAATAAAGAACTTACTCTC
>cap3_Contig378
GTAAAAAGGAGATCTTAATGGTTTTATTAGAGCTTTTCGAATTGAAACAGATTTCAAAAG
ATATACTTATTAACACTTTAATGGAACTATGCTAAGAAGGTTTTGCGAAGAATCTTTATA
TCTTTATGAGGATGTGATCTTTGATATTGATGTATCGAGTATTACAAATGATAATTTAGA
TGAATATATGCGTAACATTGGTTGTAAATTGTTTAGTCAAAGACCTACAACAGCTCCATA
TGTAAGGGCATTTATGATGTTTGGTGCATATGGTTTTTGGTTAAAGCATGCCAGTTTGTG
CATGGTTTTGGCATAATTCTCATTGTTTTAATAAAAAAATTGTTTTCTAGTAAATTCTTC
ATCGAATCTGACAATTTCCGTCCGAGCATTTAGGTTTTGGTTAAAGCATGCCAGTTTGTG
CATGATTTTGCTATTAATTCTCATTGTTTAATAAAACGAATTGTTTCTAGTAAATTCTTC
ATCGAATCTGACAAAGNTGAATCGTGTATAGA
>cap3_Contig379
ATAGATCACTCTTATTCACCATCTCCACCCGCGCGCGTAAAACTACTATTCACTTTTAAA
ACTATTGACAAAAAACAAACAACAACGACAATAATATTATTAAAACGAAACAGAAACAGA
ACAGAACAGAAAATAACCAAAACAATATTTGAATACTTTTTTCTATAACCTATTCTTTAC
CATCGTCATAAGCTTGTTCGAGCCCATGCAGATTCATGTGCTTTAAGTACATTTGTTTTA
AACGGAATACTTTACAACATATAGGACAGGTAAATTTCGAGCCGTCTCCCAGATGAACCT
TCATGTGGCTGTTGAGATGGTCTTTACGTACAAAACCCTTCTCACAGACTGTGCATTTAT
GCCTTTTATCACCTAGATGTATAAGCATATGGTTTTAAAGTTGTGCCATACAGTAAATGT
TTTTGGGCATTCGCTACACGGGAATATTTGTGCATCCTTGTGCGCCTGCGCGTAATGCCG
ACTCAGCTCTTTCGAATTCGGGTAATTGATATTGCATGTTTACATCTCCATCGGGAAGGA
CTGGGAATCGGTTCTTCGACGCTGTGAACTTTTTCGTAATGTTGTTTCAGAGTTTTCGCT
TCGTCGAATATAATGTTGCACTTGATGCACTGCC
>cap3_Contig380
AAGATTTGAACCACTGATTCCTCCATACTTGCGCGTACAGCAGACGCAACACCTGTAAAT
GTCCCCAACACTTTTCCTTCTAATTTTGCAGCAACAGAATTACATAATTTCTCAGCAATA
TCAACAGCAACATTCTTTGATATCAAATGTTCCCTGGTTTTATCCAAAATTGGTACAATT
GATTCTTTAGTAATTGCTTTCTGGCCAGCCAGACCTTGGAAGAAGCCGAAGACACTGCCA
CCGCTTGACTTCGAAGCTGTTCCATTTGTTACTCCTGGTTTTGTTTTTTCTTCCACTTCC
TCATTGGCGTCATCAGCAACCTCGATAGACTTCAACTCTCCTCTCATCTTACCAACCATT
GCTTTCTCGGTTTCTGTGATATTACTTTCATCGCTACCTGGAGCTCCATTCGAGCTGCTG
TAATCAAGTAAAGTTGCATCCTTAGCTGTACCACCATTAATCCAATGACGATCTTCTTTT
CCTTTCTTCGCTTTTGGTGTT
>cap3_Contig381
TTAGGCAGTATTTTAGTGTATGGAAGCATGAAATGCTCATGTATTACAATGAAATTGAAT
TCAATATGAGCTATGCGATGTGGGTGCAATCATGGTACCACTTCATCAGTCTGTTAGATG
GTATTCATATTCCTCTATATATTAAAAGCTGTGTAAAGCTTTTGTCCTGTCATCATTCAG
CCATTAATTGTAGCCGTCCGCACCAAATTAGATTTATTTAGATTTGTCGTATCATAATTC
AATGACGTATTCTCATAACATGAAATCTACTATCCGATTGGATGATACTACACGCATAAT
TAGACTGTAAAACGCTGAAAAACAAGACAAAATAATGTCTGCGATATTAACTCATTTCTT
AGTGTTTTTGCATGAAGTTAGACCGTAATAAGGGGAAGATTACGTATAGTGGTC
>cap3_Contig382
ATCTCATCAGTGGGATATGTGTCGAAGCGATGTCCTCCCCACTCTCCACCTACCCCAGCG
GGACGGTGGAAACGTGCGTGTACGCAATGGACGCCCTACTCGAATCGCCGTTCGGACGAA
GTTGTATCGTTGAACCCAAGCAACTGTCGATCGAGCTCCTCACCGTACTTCACCGTTTAC
TTCTCACACACGAGGATTCTCGCCTGCAACAAACCATTCTTGACATCGTCTATAAGTGCA
CACTCGGCCTATACGAACACATTCACCGAAAACCGAAAACGAAAGAAGAAGTCGGTGTAA
AGACGAAAGAAGTCGGTGTAGATGGTGAAGACGATGAGAAGGCAGAAGGTGAGGGAGAGG
CGGAGGAAGTTGTAGAAGACGCAGACCTGCGTGAACATACCATCTCCTCGAAGAAGAGCA
TTGTGTTCAGTGTGCTGGAGATATGTTGCTTCATGGTGACGAGGTATGCGAAATCAGTCA
TTCCCGAAG
>cap3_Contig383
TGAGAATCGGTTTGTAGATGGCGAGAAAGTCGATGTGTTTGTACGACACGATGTTGTTGA
GGATACCGACGGTGCTTTGGAGAACTGTGTTGCTAACGTCACCTTGATTCATCTGCATCA
TCTGTATAAGGTTGGTCAAGATATCCCTCTTGATGAGAACTTCGATTATGCTGGGGAACT
TCTCGCTACACGAGTACATCAGCTTGAGACAATAGGAGGGGAGGGGCTCCTGATCACGAA
GAAGATTCTCGAAGTCCGAGATGAAGTATTTTTCGATGACCGCGAATAACGCATCACTTT
CTTTCTCTTGGCTTTTCTTAATCGTCTCCTCGGGTTCGTTATCCATAAACAACGTCGCGA
TATCGGAGAACAACTTCATCGAAAGTATTCGCAAATTCCCGTCGTCACTTTTCGAGAAAG
AGCGAGTATGGGCAGGATTTGAGCGACAATGTCCGAGTAGTTGTCCAGAAGGATGAGAGG
ATGTTGGGTCATCGAATTCGATGAACG
>cap3_Contig384
TTTTCCTGAGCCAGGAATGCCTCTGAGAATGATAACAATATTTTTTGGCCTCGATTCTCT
ACCAGGATTATCTAATATATCTGAAGCTGAGAATATTTCAGGCTTTAGTTCTGCAGCTGG
AATTGGTGCTGGATCCCTGCTTGAACGTGGAGAATTTCTATGGGAGGAGGAGGGTTCTGA
TAGACGTGAATGGTCTCTTCCACGATCTCTATCTCTTCGATCACCATGACGATCTCTATG
GTCCCTATCTCGATCTCGATCTCGGCTGTCTGATCTGCGAGAATGCTCAGTGCCATGGTG
ATCACGTCTCGGTGAGCCACGTGAACGTGAGCCATCTCTTTGAGGTACTTAGACGACGAT
CTCTTCTAGTCATCACTTCGCGCTGAA
>cap3_Contig385
TTGAAGATAAAAAATCACTCTAAGGTTGTTTGGCTTGTTGACACAGATCATCACCTTCAT
CTGTTCCAAAATCAGCACAAACAATCGAAAAAGCATTATTGAATCTTGATAAAATGTATG
TGTATTTAGTCAACACAAGTAAAAACTCATTTGTTGGCTATAAGATAAGATATACAAAAG
GAACTTTCAGTCTGTATGAGGTTTGGCGAGTCAACATCCCAACAGAACAGCGAATCGAAA
AACTTACATCGAAGCGCAATGATGAGGTGGTGCACTCGGTTGGTCGAGTTTTGGGTGATC
ATACAGTTTTGTATAAGTACTTGAACCCAAACTTACTTGGCTTCATGACAGTGCAAGGAA
GCGGCGCAAAAGGAGCAGTGTTTGTATATATCATAGATGCTGTGACAGGACAAATTGTTT
ATCAAGCACGACACAAGGGAGCAGACTCACCATTTGATTTGATATTATCAGAACACTGGT
TGGTTTATTCATATTACAACTCAAAAGGGAGGAGAATTGAACTGGCTGTAGTTGAATTTT
TCGAAGGTTATGAAGAG
>cap3_Contig386
AGTTTTTTAGTATTCATTAAATGACACTAGATAATAAACAGTGATATCGGTTAGGCAGAT
AATAAATCAAGTTTGGAGTATTTGAAATAAGGAATTACTAAGAAACATTAAAGAATGAAT
TTCTAACAATCATAAGCATCCTGTGTGCTTATCATGAAAATAAACTTGCCTATAATAATA
TTAACACGGTCGACTTTGAACTGTCTCTACGTCCAAGCCACCATCAAACTCTTATAGCTG
CATTTTTTTATATCATTTATAACTAGGGTTTCCAATTGAAGTATTCTTCAGAATTAAGAT
ATTTTTAAGATCACGTTGAAGATATGCTCCACCTGAATAGTAATCTAGACCATTTTTTCT
GACTTTTTGATCATTTGAACCCGATTCCATCTGGTTACAACTGAAATTATCAAATATCAT
TCTGTTTGTCTGTTTGACCG
>cap3_Contig387
GTTGTGGTAAAATGTTCACCACGGGCTATGGTTTGAAATCGCACTTCCGCACACATACGA
ACGAAAGGCCTTACAAGTGCCAGTATGTTGATTGTACGAAAGCATTCAAAACAAGTGGAG
ATCTACAGAAACATGTCAGAACCCATACAGGGGAACGTCCCTTCTTGTGTCCATACGACG
GTTGCAATCGTTCGTTTACCACCTCAAACATCCGCAAGGTTCACTTCCGCACCCATACTG
GTGAAAAACCATACAAATGTGAGATTGAGACATGCGGACGAACATTCGCCAGCGCAACTA
ACTACAAGAACCATTCACGAATACATACTGGTGAGCGACCTTACATCTGCGAAGTTCCTG
GATGTGCGAAACGTTTCACCGAATACTCTAGTTTATACAAACACAATATCGTTCATACAC
AACAGAAGCCGTATACGTGCTCGCTGTGTAACAAAACCTACCGACAAACGTCAACTCTCG
CTATGCATAAACGAACAGTTCACGGTACTGAGGATGTTAACGATGG
>cap3_Contig388
TTTTATACACATTAGAACCACGTGATATGAACAACACGTGGTTAGGGAGCAATATGCTGC
TCCTCAACGGCCTGTTGTTGTTGTTGTTGCTGTTGTTGTTGTTGATCGCTGGTGTCTAAC
TCGTGTTGATCCGAAGCTAGTTGTCGAATCATGCTGAGAGGGACTGGGAACGAGTTTCCG
AGCATCACGTTGCGATTCTCTTCTTTACTTCTGTTGGGCAGAAGTTCATCCAACATCTCT
TCAACCATGCAAAGCTTTGCATGTATCCCGCCTCCGAGGGGGTAGGTTATCTATCTCCAT
TGTGAGCAGTTCCTCAAGAATGTCATTCAGGGAAGTATTTTCACGTTCCTTTACAATGCC
TTCTAACTTTTTCTCGTAGGACTGCATCGTAGTTTTCTCTCCTTATCTAAGGCTGCTTCT
G
>cap3_Contig389
CGATTCGCTCGACGGCTATGTGAAAAATAAATATTTTGGCTCAACTGTGGGCCGTTCAGC
CAATCGTATTTACAAGGGAAAGTTTACTCTCGATAATGTGACTTACCAGTTAGCGTGTAA
CAATGGATCAAATCATTTACATGGTGGAAACATTGGTTTTGATTCCAAAGTGTGGGATTG
GAAAGAAGTTGAGAACGGTGTTGAGTTTACTTTATTAAGTCGAGATGGTGATGAAGGTTA
CCCCGGTACACTTCTCGTTACAGTTGCGTATATTATCAAAGAGGCTAATGAGCTGACTAT
TAGTATGAGAGCGCAATGTACTGACGGGAACCGACAATAGTCAATCTTACAAATCATGCT
TTTATTAATTTAGCAGGTCAACATGGGGGACCTTCTTGCAACATATATGATCATGTCTTG
AACATTAATGCTGAAACATACCTGCCACACCTTGATGCAATTCCTACGGGGATATCGCAC
ATGTTGCTGGC
>cap3_Contig390
TAACTATATAAATAATACTTTAGAAAAGGAAATATTAACACGGATTCTCAGAGTTGGTCC
CACACTTACAATGTGATGCAGGGCAATTGCCAAGTTTACAATTGTTAATACACCATTGGT
TCATGTTCGGTAGACATAACCAATGGCTGACTGCCCAACATGTATCAGGCTTGACCTGTC
CCTCACTGCACCCACTTTGGTCCGTGACCCCGCATTTGCAGTACGCTGCCGGACAGTTTC
CTGTCTTACAGTTGTCCGTACACCATTTCGTCCAGTACGCGGAGCATTTGTAAGTTTCGG
ACGCCCAGCAGACACGTGTCGTACAACCACTTTGATCAGTGGCTGCACATGCGCAATGCG
AAGACGGACAATTATTCAGTTTGCAGTTATCGACACACCATGTGTTCATTGAAGGACTAC
AGTGCCAAGGTCCGACAGCCCAACAGACGTCATCGGTTTTCCGGAAGGCGTCGTTGTTTT
GCCGTTGTAGTCGTTAGAGCTTCTGTCGTTTTATA
>cap3_Contig391
TTCTTATCTAGTTTTAATTGCTCTATTGTTACTAGTTTGCTTATACTCTTTGAGAAGAGA
CAGTGACTGGTTTCTATCTAGTCATCAAAGTGGTTTCCACTGTCATTCGCAATTAAATAT
ATAATTTCATATTTATTTATTTATTTGTTTATTTATTTTATTTGTTATTTTATTCGTCTA
ATTTTGTTCAACTTCATCGTTTGATTGAGCTTGGCTTTTACATCATCAAGCGGCTGTTTG
GATCGATTCAAAATGTCAAAATGTGATGTTTTGTTGAAATTGAGAACACATTTTGAAAAG
AGCCTATTATAATCTGGATGATGTAATTTCCAACCAATCAAACAGCAAAATTAGCCGTAA
GTTTTTTTTGATTTAGAATGGAAGTGAGTGTGTGGAATCTCGATAAATAACCAAATAAAC
TAGTTTAAAAAACAATAAATAAATATCTAGATAGGTAATAATAAATAAATAATAAATAAA
TTATATCCTCTCTTCGTGAAGAAGGAGTAATAGCGGAATAAATCTTTCAGTTCCATTGTC
TTAGAGAGGATGCAGTCAGATTCTTCCTCAAGTTCCTCGTTCAGTAAATAAAACTCAGTA
ATTAATCTTTGAGATTAATTGTATTGTAATTTGGAAGGAAGGAGGGAGTTGCAGAATTAC
TTAATTCTTGAGCTCTATAGATTAGCAATATTTTTGAGATTTGATACCTTGCTATATATG
GTTATAGTCAGGTTGCAACGAGAATTTCATTGAAAGAGCACTGATTGGAGAATGATACTC
ATCAAGAAAGGGACCTATTTTTTTGGAAATTGTTGATAGTTAAATGGATTATTTAGTGAC
GAGACAGGCAGTCGTTTTATTATTC
>cap3_Contig392
AAGATATGAAAGTAATTTAGGTACTACTAATTATTTTCAATGAAATATAGGGTCTTATTC
AAGTGGAAGTTGGGTTTCATTCAACCGGTAATGGGTTATTGATCCATGTGATATGAAAAT
TGATCTTTCTGCACCGTAATTTACTTCAGCCAAAAGTGCGATAGTAGGCAACTATTTTCC
CGTTCTTATTCAATAAATAAACAAAATATCTAGAGAGAGACTGATACATTTGGAATTCTA
ATCAGTGAAAATGGATTTATCTCTAAAACAATAAATTGTATTCAGTACGATTTATTACAT
AGAACTTTGCAGGATCTTAATCACTCTACCAAATATATCACACTGACGCATTCAGCTCCA
AAAAAATCTTTTCTCCGATACAGGCATTCAAACGTTTTAAGAGATATAATGTTTGAGGGG
AGGGATAAGTAACTGGCAGAAATATCGCCTTCGCAAGAATTCATATTGTTTTGGCCGAAA
TCCCGGTGATGACATCACGCCATAATCGTCGGACATATTTGTCGCTTCAATCGTCGGA
>cap3_Contig393
ATGGAACATTCCATTTCTGTCCCTACCGTTTTGACTTTTCATTTAGATCTAAATTTTATT
TCAGTACAACTAAAAAGTCTTTCAAACGATATTTCATGTCGACATTGTTCGTTGGGGTTT
ATGATCATCGGAAAATTCTTACGTAAAAAACCCGATATTGACGGTCTTTTCTGACGACAT
TTTGGATTTCTGACGGTAACGATTTTACTCTACGACTTCAGATAAAACACTGTTTTGCTA
GAAATACGACGTATATTTTGTGATGTTAGATGGATCACCTAATCTGTACTGTTTTGCTTT
TTTTCCCAGTTCCACCAATACCTAATAACAACAAATGTCCTTCAGATTGTCCAAGAATCC
GAGCAGCAGATGCAATATGTCGAAATACTTGTGGGAAAAACACCATCTCGTTTGGAATAC
CAACATCCAAAATTTTCCCATGATAATGATAATCTTCAATAATCTGACTAAGCTTAGATT
CATCAGATAAAAATTTATAAGTCTT
>cap3_Contig394
GATTAATGTAAGTTGGCAAAGCATGATAACCCTTGAGTGAATACCAAACTTTAGTATATC
TTGAAACGCCAAACCCAGATGACATTGAATTTGGTGATATTGGATTTGCAAGCGAATCAG
ATAGCTTGAATATTGTACTGCCAAATGAAGCACCACCATATCTGTGTTGTTTTAAGGAAT
TTTCAGTCCTTAACACATACTCAGAGAAGTTGTAGTTTGATGCATCGACAACAATATCGT
TCCTTGTTGATCGGTAGGTCGGAGGATTGATACTTTGCTTTGGACAAATCTGCTGACCAG
AAAAGCAAGAACACTTGCGATATTTTGAAGTGTAATTACCAGAACAAAATGAACTTTTAC
AGACATTCCTTTCAGATTTATAGTAGTTTGTATAAAATTCCATCATTCTCTCAGACAACT
GATCAGTTTGTTTCTTCTCCACAACAATGTAGTTTGGTTTATTGTACATTTCAGGCGATA
GCTTCAAGGAAGGTTCTCCAGTACGAGGAGGTCTGATAAACGACACAAACATAGCCACTA
TCACAAAGATGGCAGGTAGAAAAATTTGGGATAAGT
>cap3_Contig395
GCGAGTTACTTTTCTTCTCAAGGAATTCAAGCACGTCTTTGCTGCCTTTGGATCCATCCC
TGAGGTGCGGCAACATATCTGCCATTTGTTGTTTGAAGTTCATCATGTAGAGTTTAACGA
GTCGTTGGAACTTCTCGAGGTTGCGTGCGATACGCGGGTGATGCGCGCTTGTGAACGTGT
CGAGGAGATCGTTGCTCTTGCGGAGAATGTCGTCCATCGCCTCCACCTCGTCTCCGATCT
TCGTGATCAGGTTTTCCTGGACTTCGAATAGTGTCACTGACGGTTTTCCCAAGGGTAACA
TTTCGATCGGATACAACCACACCTTGATGGGAATAGAATTTTCGTATTCGTCTCCAAGGA
GATCAGGGAGCTGTTTGTAAACTCGAATGGCTTCCTCGTAGTTGCCAGGATGCTCCTCGA
GAACGAAATCTCCATGAAACTTGCACGTAAAGTTCTCGGTGATGTGTCGATCGGTATGTG
AAATGTTTGCAGCACCGGTCCCGTTGATGTGGAACGAGGGAATCTTCTTCACGGAGACAG
CGAGCATGCCTTCAATATCTCGTTTCGATTCGCTTTTAGCAACCGATCGATCAAACACAA
ACACAGCTCCCGCGCCATATTGGAT
>cap3_Contig396
ATTTTTCAAAACCCGTATTTCAATTTTCAAAGCCCTTACATTAGGATATATAATAAAAGT
TTCAGTCATTTTGAATTTTCCCAGAAAATCTTTAGACTTCTTAGATTAGCCGAAAAAACT
GTCTGGTGATTTTAAGTTTGGTCAAATAGAACGATGTTTTGACATTTCTTTTGTACGGCA
ATCATATTCTTGATGAGATTATTTTCAACCAATGAAATCAATATTTAATCTTTTACTGCT
AGCATAGTGTAGGAGGAGGTATTCAGGAATGCATCTTCGTCGTTTGATTGATGGATACGC
TCGCGCCATTGCACAATCTTCATACCGGCTTCTCGGACAGCATTCTGGACGTCATATTTT
GGAAGGCGGACATCTTGAAATCTTGTGTTACCGATGTCCCAGTAACCCTATACGAAATAC
GACAAGTTAAGATGTTTGAAAACAATTGCAACAATACAATGGCTAATACAGATATGTATG
TATTTTCAATGAAACAGTGATTTTGGTACTTTTTTCTAATTCTTTAGGTATATTTGCCTA
C
>cap3_Contig397
GGGTTTTTCAGTAGTGAGCCGAAGTTCGCTTGCGGCATGAAGAATTTGTTATGCGGTAGT
GACGTAATAGCACGCAAGCCGTCGATCTGCTGAACACCAATCGGAATCATGATGATTTTC
ACGCCCAGTTTCCGGAGAGGGAGGGCGGCTTCTTTCAGGCGTCTCGCACTCTGGCTGCCA
TCTGGGTTGCTACCCGTCAGTACGACAAGTACTTTTGGAACGTTCTGTCGTGAATAACCT
TCGAGTGTGAATACTTTTTTGTACGCTAGTTCGAGTGCTTTGTCGAGTGAAGCCCTCGCG
TCGCCGAGATACGGTATATCATCGACAGCTATCGTGAAATCGTCTTGACTCGTTCCTCGG
GACATGTTGAAAATGAGTTCGGCTTGGTTTCCGAACACCGACGCCGACATGTGAGAAGCT
GTCTCTGAAATGATGAATTTGTTGCCAATCGCTTTGATAAACGTAAATCAGCTGAAAAGC
ACGCTGACGCAGCCGACAGAATGGCTGA
>cap3_Contig398
CTTCTTATGCTTAGTGTCTTGTTTTTGTTTTTTGCCGGGTAAAAGACATAAGCGTACAAA
TGGTGTTATCTCCATCATATCGCGAGTACATGCTAAATCAAATGCTTTTAATATATGTAC
TTCTAGTTCACGTTTTACTTCGATGTATTTCGTTTTAAAAATGATTTTTCCACCTCGCTT
GTATAAACCTCGTTGTTGCAATCCACCGTTGCAATCGCGCTTGTAGATACCTTTTGGTTG
GAAACTTGATAATAACGGTTGATCTTTCATTTTCAATGGTTGTACAACATCGGCAAACGA
TTTTCTGAATTCGGAGCCTTTTGATAATTTGTCTAGACTTTTACTTCGGTTGCCAGCAAC
CCCTTCGTTTAATCGCTCCACTCCCCCAGCAAACATGTCTTCGGTGATGGAGAAACCTCG
ATGTGCGATTGTCTTTTCTTCTACTTTCTCCATACTGGCTTCTT
>cap3_Contig399
CCTTTGTGTGCATTTATCATACCATTCAAATGACTCGTGCAAGGCTTTATTTGTTGCGAC
ACTCTTTTGTTTCCTAGTAACGAAACTGGTTGATTTCTCGTTCTTCTGTGGGGCTCGATA
CTTCTGCTGTTCTGTGTTCAACCCATCTCGTAACATATCATTTGTAGATCCTGAAGGGGC
TGGGTCATTATCATCATGGGGCTGACACACCATTTGGTATGACAACGTTACCAATTAACT
ATTTAGTCTGGTCGAGTATCGTTG
>cap3_Contig400
GGCTGATCCATTTTGAACAGGTCGAGCTAAAGGATTGAAACGTGCTGCACTACCAACACG
TCCAATTTTCTGAGCACCTTGCATGTTATTGTAGTCCATTTGCATACCATATCCTCCCCC
ATAACCATTTTGATTGAAATTTCCATAAGCAGCAGTAGCATAGTCTGGTGTACTGTAAGT
GCCGTTGAAGACCTGATTCTGTTCCATGAACTTGTGATTCACAAACTCTTGATACTTGGG
ATGAACTCTTTGTTGTTCAGCATTGTCTTTAGCATAATGAATCTGTAAATTCATGCCATA
ACCATCTGCATAACCTTGCAATGCTCGAATGGCAGAATCTGCATCTTTCTTTTCTTTGAA
GAGAACAAATCCAGCACCTTTGGACGTGGAATCGACATTACGAAGAACTTTGACTTGAAC
TAACTGCCCATACTGAGAAAACAAGTTTTCCAATTTGCTTTCTTCGCAGTTTGAACCAAG
TCCTGTTACGTGTAAGTTAGTGTTTTTTGAACTGCCTGGTGGTTTTGAGTAAGCAACTCT
TAATGTTTTGTGTCCTATCTGATGTCCATTTAATTTTTCAATGGCCATTAAGGCATCTTC
TATTTTACAATAGTCAATAAACCCATATCCAAAACTATAACCAGTTAGCTTTATCTCTCA
TGACGCGAGAACTTTCGAGGGTTCCAATAGACTCGAATATTCCTCTAATTCTAAATCTGA
CATCTCCTGGGGTAAATAATTGACGATGAGTTTCGTC
>cap3_Contig401
AATAAGTAATGCTGATCTGACTGCAAGCATACAAAATGTTGTTCTTAGTTCTCCTAAGCC
AGCACTGCCTCCCCCATCAGATCCGCGCAATGATCTTCTTACTGCCATTCGCGAAGGTAT
GAACCTTCGCAAAGCTGTCCAGATTACTAAAGAAGAAAGACAGCAAGGTGGGATGGGAAA
TGATGTTGCATCTATCCTTTCTAGGCGTATTGCTTTGGAGTTGACAGACAGTGAAGGAGA
CAGTGAATACAGTGACGAGGGGGAATGGAGTGATGATTAGTCAACGAAAGAAAAAGGTCT
TGTTATCTGTTTGCTTAGATACTTTATATAAACAAGTTATTGGATATTGGTTTCGAAGAG
CCGTCTTGAAATTGAAAACAAATGAATTTTTGATAGTGAATCGATGATTTTATGGGTTAT
GTAGAGAAAACAAATTTGGTATTGAATGTTACTTTTGACTATAGAATAAACATTGAGATT
TATTATTACATGAACAATTTCAATTTCAATACACGCAGAACCATGCCTTACCAGGAGGTG
TTACTCATTTGTTTATTTAGTAAAAATATCATATTTAATTTTAGATTAATTACTTTCTTT
CTGGAAATTAACATTCCAGAAAATTAATCGACTCTTAAGGGAGTCCAGAATTTATATGTA
AATTGTGAAATAAC
>cap3_Contig402
GACAGTGCGACATCGACACCGGCATCAATGTCAGAAGAACGTCATCTTTTTGTTGGCAGA
AGATTAGCTCTTTTTTGGCATTAGAGGAGCTGTCTTGCAGAACTCAAGGGGACCACAGAG
TGATACCGCTAAAATTGCCGTGGTTTATTCTTTTCTACTTGGAAAATAGAATCCAAAGGT
TTCTTCATTATTGTCTTATACACACTTATTGGAACATTTCAAATGGATCTTGTGATCGGG
ACAATAATTTTGATACCGAGAATCCGATTGGCACTAAATCGGACGAGAATAACATTAGAA
AAACGATATAGAATTGAGAATACGCATTTAGCACGCGGCTTTTCACAACTGCTTTCTGTT
TACTTCTCTTCAAAGCAAGGGGTACGAAGACAAAGAGCAAAACTGTAGGGCAAATCACAA
ATGGTTTTAACAAGAAGGACTTTAAATACACAATAAACATTT
>cap3_Contig403
ATGCATTAAATATGAGCAGCATCCTTGTCTAGCATTCACTATCAAAAATCCATGCACTTG
TTGTACAGCGAAACCAGGGCAGGAAATAAGAGGTGGTCATTGCCAATGACCATCCAAAAA
AAGGGTGATGACCACTCAAATCAAAAGTTGAGTGGTCATAATGACCATTCAATTTTTTCT
TCCTTTTGGCTTGTTATTCATTTGAATCTTCTCAACTCTTCAATCGTGAGAAAACNTTTT
TAATCTCTAACGAATTTCATGGATAAAAACGTCATTCATGTAAAAGCTTATAGTATAAAA
TTTAATTCGAATCTAGTTGGCATTCCTGGACGGTTTTTACTTGCAGTAAGTTGTTTTGGT
ATATCTAACAGAGAAATTTTTCAAACAATAGAAACCGTCCATGTTAGGCAAAATGTCGTC
ATTGAATTCGCACGACGTCATTAGAAACAAGAGGGAAGACATCACATTGCATTGAA
>cap3_Contig404
GCTGGTAACGCTGGCGATGGACGAACTGGAGCTGGTCGTTTTGGAATTGCTGGATTTACT
TCACCAGGTCTTGCAGGAGGTGGAGGATTGGGACGACTTGGAGGTGGGGCAGGTTTGTTA
CTGATATTAGCGGATAATGGTCTGCCACCACCGGGCCTAGGTGCACTAAGGACTTCGAAG
TCGTTTTCTATCATTTCTGAATGGTCGACTGGAGGTGGTAACGGCGTTGAGATCGTGCTT
TGGTTTAAATCACCGATGATCCTCAATGCTTCTTTGCTTGCTTGATAAATACGCAGCATA
TCGTTTCGACGGGCAGCCTCCATGTCACTCTCTTGCATTAGATCGTTCGTATTGCCTTGT
GCGTACAAATGAGCAAGCAACTCTTGTGATATAAATTCTTTGGCTTTTCCATAACCATAG
CCATACAGTATTTTCGGTACGTATATCTTGTATATTCTTTGAGTATGTATTCGTAAGTAT
GAGTCTACTAAGTTGCGGTA
>cap3_Contig405
CCGGGCTGAGTCTTATACGATTCTTATCGAACGGTAATATATTTAAAATCTATTTTTAGT
CTTGTTTTCTGGATGACTAGCATCAGTAAATTGTTCTTTGTCTTTAATACGAAAGCCGGA
CTCTAACCGCTTAAATTCAGACATGAAACGAGTCTCCCCAGTTTCGCTATCTTGTTCGTT
TAAATATTTAATTTTCGAAACTAAATTTTCAGGCGATATTTCTGTATTCCCACATACGAC
ATTGTCTAATAATGCATCGTAGATGAACGTGTATTGACTCTCGGTTTGAACCATGAAATT
TCTCTGCATACGCATGCGCAGAACAGTTCCAAATATATCAACCGTGTCCTGAGTTTCCAT
TTTGACGCAACAGACCTTCGATCGCAATGAACGTTCCTGTGCGACCAACACCAGCCGAGC
AATGGACCACTATGGGATTATCTAATTCCTTCGGGAAATAACTCATCACGTGTTTAATAA
CGACACCATAGATGTGGGGTGAAC
>cap3_Contig406
GTATGAGAAAAGAGAAACGTAAAGGTGTTCGATTTCAAGTATTATCTTAGTATTTCTTTA
GTTTTTTTGTCTGAATATCCGAGATGTTGAAATGGCATTGAGTTTTCATACAATTGCTGG
TCAACCAGTTGATCCTGCCACTTTTAAACAAGTTGCCAAAACTGTTACTGGGATTGATTT
GAATGATCACTTAGTAGATATTGTGTTCTGTATTTTGATGAAAATGAAGATGGACAGTTG
AGTAATAAGGAATTTGTGTCAGTTATGAAGGATAAGATGTTTCGTGGTTTGAATAAGCCT
AAGGATACAGGTTTCACTCGCTTAATGAGTGCTATTGTGGCATGCTCAAAACAACACATC
ATAGAATCATGGTTTCCAAAAGATCATACGCATTGAGAGGATGAAAGAATACGGTTTGAA
TTTTGTAATCAATTGCTCTTTTGAGATTATTTAGTACGTTACATTCCTTAAATATGAAAT
TAGTATATGGGAAGCTTAGGCTTCTT
>cap3_Contig407
GTTGGTATGTTGAAATAGTTTGCTGATACGAAGATATTGATTGTCCATTTGGATTTTGTT
GAAAGATTTGTTTATTATCTTGTACTTTTATGAGAGTTGGCTGAGGCCCTTTCATTTCAT
CATTTCTTGGGGTTACTTTGTCACTATCATCATCAGGTGATATCGGTCGACCTTTGTTTT
TACGATTATGTTTACCAATAAACCTACCTCCCATGCTACGATTCCGACGGACAGCATGAA
GATGACGAGATTCATGTAAATATTTCTTCCTTGATTTCGGTATTTTACCCTCTGATTCCA
GTTTTGCTCTGGCCTGTCTACGCTTGATTATTCTATGGTATTGTTTTGCATTGACATACA
ATGGCTCATCAAGTGTTTCCACAGCAACAGGAAGTCTTTGAGCAATAACTTGGTGACCAT
TTATCACTACTGCAGTAGATTGCTGAGGTTGTCCTGGTGTTGTTCGATTTAAATTAGTAC
CTGATTGGGCATTAAATTCAAACCTTTGGTCAGCATTAGAAATCATTTGAAGTCCACTAG
CTTGGCTAGGATCTATTATATACAAAGCTTTGCCTGGGTTGTTTGGGTCTTGAACATCTT
GAGCGAATATTTGTATATTTTGTGAATTTGTAGCAGTTCCCTGTAATGCTAACTGTTGTG
GCTGTGTAACAGTTATCTGGACGTTGGGGGAACTTACAGCTTCCATGATTTTAAGCGCAA
CCCAGTTTCAC
>cap3_Contig408
GTAAGTTGAAGGAAGTAAACTATTACCCTTATTCAAATATGAGAGTTACAACCAACACTA
GCTTGGAAATCAACCCAATATTTTCCTTGGACGTTTAAGGTAAACATGACGGAAAGTTTT
GTTCACGTGCCTACCAACATATATGCGAAAAGTAAGAATGTTTTGGAAATAGTTCGATTG
GACAAGTTCATTAGATTCCCGTGTTTAAGGAAAATTTTAACAAATCTCAAAAGAAACTTC
TCTATCAATACTATGGAGATCATTCAGGTGTTCTACGTATATATCCTGGAAATAACAACA
ACGTCTCCGACCCACTTCCAACTTGATTTATACGATTGCCGTCGCCGTCCTTGGTACGTT
CAATCCACGTCTAGCCCCAAAGATGTCGTTATAGTAATTGATCTCTCTGGGTCAATGATT
GGCAGTAATATAGGTATAGTCAAAGATTGCAACTGCATCTTTAATTGACACACTGGAAGA
GAATGATTTCTTTAATGTGATTACCGTCAATAAGAATGTGACATATTTAAAACCTTTC
>cap3_Contig409
GGAAGACCGATGTCTGCGCGCACAGAAAAAGCTCGTAAGATGCACGATGCATACTTGAAG
TCAACTGGGATGGGTAAGTATGCAGCCCCTTCTTCTAACTCCTTCTCCCGACACGAATCA
AAGGGGTTGAAACGAAAACCTAACTTATTGGATGACACACAGTAAAAAAGAAGATTTTTA
TTGGTCGATTTATTTTAAATATTTTTAACTCTTTTTTATTTGTATTTAAATGTTCCCTTT
TTATATTCATATTAAATCATAGGTTCGTTATAACAACACTGGAATTTTGGAGCTCAAATA
TTTTGCTCTTATGTTGAAGATGTATGGAATCATTTACATTTAGTAAACTTCTATGAGACT
ATCAGTCTGTTTAAGACTATTTATTTTGACCATTAGTCGATTTTTTTCTATTTTTCTTTC
TCTATGCTTACTTTAATTTGTGATAGTTGGTGCTGCATTGAGATAGGAAAAATCTCAACT
TGTTTTTTCGTCCACTTTGTGGCTAAAATGTTCGTATGGTGTATTATTTTATTCACGCTA
TTATGATAATCATTAGATTGTTGTTTC
>cap3_Contig410
GGGGGGTAGAATTTTTTTAATGAATATTCTTTTTGTGTAGAAAGAATTGTTTAATTTTTT
GTTAAGAAATCAACAAAATTTTTGCTTCGAAAAACTGTGCACAAATATTTAATCGAAACA
TCAAAACTATTAATCTAATCTTCTTCAAATTTTCAGGGGTTGTTCATATGGACTACAACT
TTGCTTAAATCTTAATTCAGTGGAAAATACATGATTTTTAACATCATTTTAATATCACAG
AGATAACAATTATTTTGTGATTCCAAGTCAAAGCAAACATGGCAAACATTTTTTTTATGT
TACTCATTTTATTTAAGATTACTTTCAAATTATATACATGCAAATAAAACTGTCAATGGC
ATCACAGTTATCGTAATTATTCAACCTCTCTAAAAGTAATAATAAACTCCCTTCACTCGT
CCATTATTATTTAGCTCGTCAGAATAGTTGCGATAGCTGTAATTT
>cap3_Contig411
GGCAATACTAAAGGGACCTGCAACGTTACAGGGTGGTTCCTTAGCCTTACTTAAAGGCAA
ACCCCTTTTACTTAAAGGGCCACCAGCCCTGTTTCGAGGACCTGTGACATTTTTTAAGGG
ACCACCAATTGTTGTGAATGGACCATGGAGTGGTATCCCACTTGAGACAAATGCAGCATT
ATTACAAAGGAAGGGTACTGTAATTCGAAACAGAATTTTCCCTCTACGACGCATTCGACA
GACTGGCTCAATAAAAGACAATAAAAAACACTAGTAATGAAAATATGAACATTGACAACA
AACTTTATTGACTTAATGCAATGACATTAAAAAAAATGGCTTAAAAATGACATACAGATA
GTAAAGCCATTATGGCTACAAGACAAACAGATTAAGCCATACAACTGGCAAGAATGGCTT
TATATTTTGATTGCCACCAAAAAAAAAATAATAAATAAATTGATAGTTTGATTGGTTGAA
AAATGACATTATCGATAATCCGATTGGTTCACTGAAATAACTTGACAAGCACTTTTAGAC
TAACCAATTAGGATCATGAT
>cap3_Contig412
GAATTTAGTTCTAGTATACTCTACATTTACGTGTTACTTGAATTTTTACTTATTTATTAA
TTAATAATAAGATAAAAAATTAAGTAAAAANAAAAAAAAAAAAAGGGAAACAATCGAAAT
CGTGTACCTTTCGATATTACAGGAATAAACATATCCTGACCTTTTTTATTTTCTAATCTT
ATGTATATGGTTCCTATTTGTAATGAGAGATTTAGATAATGTGGCTGGAAGACCGGCTTT
TGGTCAATATGCGGTATGTTCAGATATTTGGGTATATCTTGAGTTCGTACCAGCATGTTA
CCATACCTACTTACCAGACATTGTCCTGGTCTAGGCTGCCGTCAACTTCAAACATCTGAT
CCGCAATATTTGTGGCCCAATTGTTTTAAAGTTGAAGATTATTTAGTCAGGAAAACCAGA
AGATTAATAATTTTTTGTTCAGTTTTCATCAGATTTGTTTGTGCTTGTGAGATGAGAGTA
AATATAATATGACTTTTTTAAATAGTTTTTATTTTGATAATTGT
>cap3_Contig413
TTGACATTCGTTTATATCTGTACATGTTTTTCCATCTCTTGCTAGTTCGAAACCTCCTTT
GCATTGACATCGAAATGAACCAATGGTATTCACGCACGACTGTACACATACATTATTTCT
CCTATCACATTCGTCCACATCTATGCACGTTTTCCTGTCTTCGCCGAGTGTGAATCCTTT
TCTGCATTGACATTTATATGAAGCTCCATCGTTGATGCATATTTGATTGCACCCATGACT
CTCCGTCGAACATGCATCAATAGCTGTGCACGTCTTGTTATCTGCTGCTAGCTCATATCC
ATTATTGCACGCACAGCTATACCCACCATCTTTGTTGATACACGTGTGTGCGCAACCGCC
ATTGATTTGTGTTTGACTATTCGTTAATATCTGTACACGTCCTGTTA
>cap3_Contig414
GTCATTATTCATTAACGTACTCAATTTGTCCGTAATAGCATCTTGGCGGTTATATTCAGA
AAGCGAATCCAGACAGTAAGATGACTTCATTTGGAATTTAGACGGTACGTACACCCAAGT
TTTAGTGAAATCCCAATTGCGAAAATCAAGTGAAAAAGTCAGTTGTTATTGCAGTACCAC
CTAAAGAAGTAAGACTAGACGGAGTTGGCCATTTTGTAGAGACGACTAGTCAAGGACGTT
GTTGTGTTTGCAAGAAAAACACCAGGAAGGTTTGTGTCAAATGTAAAAAAAGACTTCATT
CCGATCGCCAAACGAATTGTTTCTATGAATACCACAATAATTCACATATATGAGGACAGA
AAATTTGATATTTTCTTTTTTATCTCTTGTAAATATATCGTCTTCATAAGTTTTTTCTAA
CCCTGTATTAATTAGAATACTTTTTTACGATAATACTGTAACCAGCATTCCTATATTGTG
TTCAAATATTTCATTTCATACCTTTTTGTTAACTTTCAAAATACTTTACCTGTTATCTTT
CGGGCTGAATCAATACAATTATTTCTATAGGAGCATTATAACTATTTTTATCAATAAAAC
AGTACACTGCCCAATGTTCCCATATGGGAACTATTTTCATTGAATGTCGAT
>cap3_Contig415
GTTACCTCTGGCCCTGATAGCAAATTCAAACTTAGATATGAATACAAATTATAAGTTGCA
TCCTGTCCTGAAAAATTTATCACATTTTCAAAAAATATAAAAATAAGGACCTCTTTATAT
CCCAATTTTGGGCCATATAAGGATTTTGGAGGTATTAGATTTTCAGGATTTGTTCAGTTT
TCCATAAAATCTTGAATTTTTGTAGTTTCATCCTTTTTTTAAATAACATGGGTGATGTAC
AAGCTTCAAATCTAGGCACACTTTTCAACTTTGATGGACAAATATTATCCTTATCAGGGG
CCATTTAAGAAAAAAGGTTACTGAATCAGATTTTATTACTGTTCTTAGTATAGTCACAAA
ATTTCAACTCATTTGATGATTTAGAAAGGATGATATTAACAATTGGACAAGTTACTATCC
TCATTGCAGGACAAGTTTGATATCCCTAAAAAAGTCCGCAGTTTAGCAATCAATAACTTT
GTAATAACAGAAAATAGAGACGAGGGGACTTCATTGAAATTGAAGGTCAACTTTTAACTA
ACGTACAG
>cap3_Contig416
GAAATTTTCATCACCTTTCACCATGAGTGATTTGGTGAGCACCCGTACCACTTGTTGAAT
GGTCGTTCTTGGAATAGCACACTGTCTTGGATTGATCCCAACGTAACTACACAGCAGCAC
CATGACACAGCCATACTGCTCCATATGCGTTGGTGCGTACTCAGCTTCATCAAATTCATA
TTTCAATGTCGATGTCGGCGACGCTCGTGCTGCATAGCCGTATAAGAACTCTAGCACATC
ATTTGACAGGATGGTTTCTATGCTCACGCCATACCTCAGAAACAAGCGAACAAAATTGAC
ACGGTCTAATGCAAGTGACATGATCATTGCGTTGGCTAGTTGTTTTTGTGTCCCACTCGC
TATTTTCTTGATACCACTTTTTCTCTTGCCAATTCAACTCGGTCCCAGAGTAACGTCAAT
TGCAATTGATCAAATGCTGTTGTGTCATGGCAATTGAGAAGGGCCATGA
>cap3_Contig417
TGAAAATTACATAGATCAGAAGAAGCTATGTGGAGAACTTGCTCTTTCAAAACAAACAAA
CACACTACTCCAAGATAATTCGTGATGCAGGTACTTGTCAGAAATCCCTATTCAGAATAG
CAGATGAACTGTTAGACAAAAATAAACAAAAGGTGTTGCCATATTACTCTGACCCTGCAC
AACTTGCTGATGAATTTAATGCTTACTTTGTAGATAAAGTCACTAAAATTCGAAAATCTA
TACCTCCAGTGACTGGAGATACCTCATACTATAAAAGACCATTTATCGGTGATAAGCTGT
TACAGTTTAGAGAGTTAACTGAAGAGGAAGTAAAGAAACTGATCCAGACACATGGTATTA
AGACTTCCATGGAAGATCCTATACCATCTAAGCTCATGCAATCATCACTTGACGAAATGA
TACCTGTATTAACTCAGTTGGTGAATCAGTCGTTAAAAGAGGGAAGTATGATGGGAGTC
>cap3_Contig418
CCAATTTAAGCGAAAAGGAAACTTCACAGTTGTAAGTTTTTTAGGTATTCAGGCTCAACC
CATTTAAATATAAATATATATATTTCCTTAGTTTGTTTAGAACTTAACTTAAACATGAAA
TATAATATTCGTCTGCACATTGTTATAGCAATTTTGCTCTTCTTTAACTATTGTAAAGCA
ATTTTCCCAGAGTTCAATGATCAACTTATGTATGAAATCAACTGGAAGGACCCAGTAACA
ACACTCTGGGATAAAACTGATATGAGGGAGAGAATATATGCAACCACTAAGGAAAATGAG
AAATATCAATGTGCTCTGCCTATTATTCAGCCAGAAAATAGCAGGGAATTTGATATTTCA
GATGGAACCAGTCCAGAGATTCTCTTGTCAGATGTCTTGTTAGGAGATATGAAAAAATGT
TCATACAGGTTAGAACCATTTTGGACTTATGAATTATGTCATGG
>cap3_Contig419
GCAACTTCGATCTTCTTACTTGTTAATGATCAGCTTCTACAGAACTTGTTTTAAATAATG
AGCAACTTCGATCTTCTTACTTGTTAATAATCAGCTTCTCCAGAACTTGTTTCAAATAAT
GAGCAACTTCGATTTTCTTACTTGTTAATGATCATCTTCTACAGAACTTGTTTCAAATAA
TGAGCAACTTCGGTCTTCTTACTTTTTAATGATCAGCTTCTACAGAACTTGTTTTAAATA
ATGAGCAACTTCGATCTTTTTTCTCAAGCTATTTATGCAGAACAACTGAAAAAGCATGCA
AAGAAAAGCTCACGCAGGTTTATCAACTCTCTTTGTGCAAACNCTAGTTTATTTGGTTAC
CATGGTAAAGTTATATCACAGATTTATTAACCAGTTAGCATAAAACTTCCATTGACGTAA
GCACCTTAATTCATTC
>cap3_Contig420
TCGATTGGACGTTACATCATTAAGAAAGTGATAAGTCTACTTGAAACTGTTTTCGTGATC
TTGCATTTTGTCAGAAAGGACAAATTGTGACATTCTTACGATAACCGATTAGATTCTTGA
TGGTATATTTTCGAAACAATCAAGCAGCAAATTCACCTATAATTTGCAGACAACCCATTA
CTTTCTGAACTATTACGTGGTTAAGGTTAGTTTACTGAAAAAGAAGGTTACGAATAAAAA
AGGGGGTGAAAAGCTGGAAATGGGAGTGATGGAGTGGAAACCTTAATATATGTGTATTGA
TAATAAGGAGTGCTGAAATAGTAAGGATTGTAGCATTAAGGGTTGAAAAGATTAAGCTTT
GTAAAGTCTTCTTTTTTATATTTCATAAACCGTTATATATTTACATTTGTTCCTTTTACT
GCGATCATAGTTGAAATAAACTGAAAAAAATGACCGATTAATCTACGTCTAACTTTGTTT
TAAAAGAAGTATACTAGAAAAAAAAATCAAAAATAAGTCTGTGATCTAAGAAAGACCAGA
CGAGAGAACACCAATCTAGAAAATTGTTT
>cap3_Contig421
GGGAAGTATATTTCGGAGGAAGTGGCGGTTCCGGAGTGTAGTCCTCCGACTGCCATCCAC
AAAAATACGGTACTGACTGTGGGGAAGGGTCTCCACAACTACCCCAGTGCGATCCCATCG
AAGAGGATGTGGACCAGTCTGGTTTTGGATGGATACTGTGTCACCGACCGCCAATGATGG
TAGAGTACGATCAGGATTAGCAGAGGAGGGTATAGAAGCGTAGTGTCGTCTTTTTGCATA
GGCTTTTTCACGAGAGTCAGCCAGTTCAGACCATACCTTGCGAGGTGTTATTGGATTTGG
CAGGTGGTCGTTTATTGGTCTGCCAAATAATAACTCTGAGGGCGATGCACCAATGTCAGG
AGGTGGCGTATTTCTGTGCAAGAGGAGAGCTTTAACAACAGCATCTGTGTTTAAAGAACC
ACTGCCACTAAGGTTAGAGGTAAGAATCCTCTTTGCAGTTTTAACTGCTGCCTCTGCCCT
ACCATTACTCTGGGCTAATAGGCAGATGAAAGTCT
>cap3_Contig422
AGTACATACAAAATAAACACTCGTCCAATGATTTCAAATAGCCGGGAAGATATTTCAACG
TGTAAACGTGTATTTTACTCTGATAGCAACCTCGTTCCCACTCTCCCGTATGAACATTCT
TCACGGCCGAGCCAATAATATGGGCACCAGACCTCTCGTGTACGTTGATAAGTCGTTCAA
TATCAGTGTTATTGTCTAACCTCCCTAAATACGGTGCAATTAGAACGAAATGTGTGTTTA
AAAGATCTACGATTGTATTCAAGCTCTTCCCGAGGTTTAACTTTTCTTTGATGTAAAACA
CTTGCACTCTACCGTTGAGCCTATCGAACAAATATTTTATTGTATGCGTTAATTTGTTAT
ATGGAAATATAACGAAAACTTTTTGAAATGCACCAATAGCGTAATTCAATATCCGTTCTA
AA
>cap3_Contig423
ATTTTTGATAGTAAATAAATCCACCGATTCCACAAATAACACAAACAATGAATATTCCAA
ACAACCAATTAAGAATTCGTTGTCCACGTGTTGTTGCTCCAACGTCATCTGTATGTTCAC
GTTCTGCTTCAGCATTTGTGGCATGTGGAGTAATGTTTGTTAGATCTTCAACTTCTTCAC
CTTCTTCACTTGGTTCGTTTGTTTCCAATTCATAAAATTTTACAGATAAGATATCATGAT
TATCTGAGAGATCTCCAGTTGATCCTGAAAACCCGATGAAATAACCTGTTGGCAACGTAA
CACCATATTGATCTAAACAATCATTCCATTTACCCTCATCTTCTACATCATATTGAACAG
TAAGTCTTTTCTTTGATCCAAGGTATCTAATAGCAACATGTGTTTCATGATCCGTACCAC
GGAAATGTGAAGTACAACCAGCTAATTCTGTATGAGTACCATCCCGGTCATGATCATAAT
GAGATGAACCATTGTTTACTTGGGCTGAGATGTAAGGATGTTCATGGCATGTTCCCCATT
TTGGTTTGCGTAAAGTATCAAAAAAACAATGAAAGTCCACCTAGTT
>cap3_Contig424
GCCCTTGTGTTCTACCCGTAGAGAAACCTTTGGCTTGAGCGATTTCTTTATTAGCGAATT
CCCAATCTATAGTTACAGGGGCCCCCTCAGTTGCTTGTGGTTTTAGAGGGTTAACAAAGT
AGTACATGTGGTTAGAACCAAAAAGGACTCTGTCGTGATGCACCAAGACCTGCTCTCCTG
ATAACAAAATTCCATTCACCTTCGTTTTCGCGCCATTTGACGCAGGTTTGATACTGACTA
CACCGTCAACATATGTTATAATAGCATGTTCTTTACTAATACTCAGACCAGTCATGGCTA
TATCTGGATTATTGTCTTTCCGACCAATCGTCGTTTCCTTATCTTTAATGAAATGGTAGA
TAACGCCTGACAGCATCGAATCTTCATTCAAATTTACGATATGGGGAATGGTTTCTGCTT
GTTTCGATTTCGAATCGGACGTATCGATTTCTTGTCGAGACTCCTCGAGTTTTTCGTCCC
ATGTCTGCATGGCGGACGCGTTCGCAGCGAGTTGCGCGCGAATCTCTTCTTCCATCTGTC
GTCGC
>cap3_Contig425
TTAAATTGGAATTCAGCCACAAACCAACATTCTTTACCTTATCACTAAAGCAAATCCATT
GATCATCAACAATAATTCCTCTTAATTACGACCTTATCACTCAACGAATCTGGATACATC
AACAACATTTCTGTTTTTTCTGGGTTAATTTTTAAAAATTGTTTGTTTATCCACAATGTA
ATCGTATTCAAACAATTAGATTATTTTTAACACATGGTATTGAAAACAAAGAGAAATGTT
TTCCTACCATTAGAGTCATTAGCAAAAGACGACGCTTCAAATAAACATTTATCAAAAACT
TTAGGCTGCACAGAAACATAAGTCGAAAATAGTTTAGGACCCAAGACAGATCCTTCTGGT
ACATTAAATAAGACTTCAAGAATTTTTGAAAATTTACCATCAATTCTCACTTTCCTTGTG
CGACCTGTGAGAAATGATTGAAACCATTTTAGTACACCAGTAACACCAATCTCATCGGAG
AATATGGATAGTAACCTATTAATGTCTATTGTATCAAATGCAGCACTCAAGTCTAAGAAA
GTAGTAAAATTGTAAATTTG
>cap3_Contig426
TGCTAAAACAGACACCGCAGAGCTAGCCGTTGAATAGTCGTTTTAATCGACGTTAAAACT
TATACGAGCTTGACATCGCTTATGTACATCATGTACAAAGATGAGCATAACTAGCTTTTG
AAAATAAACAGATAAACGATCGTCGGCTGAAAATTACATAATCAAGAAACTGGTTGGTTC
ACTTAAAATTATAATCCTTTTTTTTAGTATCTACAAAATGTCACGTGATGACATTTAAGA
TGCACCAATCTGATTCTTGATGATGAAATATCCAAATAATTAGACGTCAGATTTACCCAT
GAATTGTAAGATGACAGCTAATATACGTCGGTACAATCGGTTATTAACTTTCTGGAACGA
ATTTTGTGGTGATCCAAAATAGGAAGTAACATTTTTAATGACGTCATGACCACAGATTAC
AAATGACGTCATAATGATATGAATATATTTCGACATAGAACTTAAGATTTCCAATTCGCT
CTACTATGTAATAAAGAGTTATGTAGTAGTTAAATTCTATTTTTTTACTTTTGTAGTGTT
TAG
>cap3_Contig427
GAAAGTGTTGACATTGACCGGCGTGGATTATCAGGTGTTGAACGCCGCACGTCATCGAAC
GACACCGCCGAGCAAAGAACACCGACACAAAGTGAACGAATAACGATAAACACGATGAGT
CCGATGACTGTCGAAGTGGGGAGCGTGACCCTCTCGAATACAGAAATCGACATGAAACCT
GAACCCGTTACCATAACCGCTAAAGTATCAAAAGAACCGCAAAATAACGAACCACCAACA
CCGAAAGGACCACCAGTTGTCGCAAAGAAACCGATTAAAAAACCACCATCGTTGGCAAAA
AGCCCGTTCAAGTTCGGGACTGTTAGTCTTCAAGTGAAGTTGGAGGATTAAAATGAACGC
TGTTTGGGGGGTATTCATTAATAAGATATTTGGTGTATATTATAGGTTGTTATTTTGTTT
GGTACTGGTTTATTTTATTCTCTTGATATTAGTAAGGGCTTGTAGAACGTAATTTGTAAT
TATTTTGGTGTCACATTTATATAGAGTCATGTAGGACTTAATCACGTAATACTTAGGAAG
AA
>cap3_Contig428
GATACATCATACCGTATCGATCATGTTTGATCGCAATGTGATTGAGTAGAGTGGTCACGT
CGGATGCATCAAGACGGTCGTAGCTTATGTCGATTGGACAGAAGAGAGTGACGTGATGCC
CTTGTTTCATCAAGGTGGTCAGGTTTTGCATCAAATTGTTCTTTTTGATTTCATTTAAGA
ATTTGTTACATCCGGCCAAGTTAGCGAATTGAGCCAATTTGTCTAAAGTTTCTAATCCTC
CTTCTTCGCCATCTTCTTCTTCAACAGATCTTCTTTTTCGTCCTTTGCCTTGAGATAAAA
GTTTCTCGAAGGCCGATCGGAATTCAACGTTTCCATAGGCTTGTTGGACCATTTTTGCTA
ATTCTTGTCCATTTGTTTGTGTGCTTCCAAAAACGTTAGTTTTGGTGTCGATGGAGGTAA
CAGAACTCCTGTAAGTCCACCTTTTCCTGATTGTGTCAATTTCAGACCTGTGAATACGTA
GTTAGGTCCAGAGTTTGGTTGGAAGACAA
>cap3_Contig429
CCCACACTCGGTAACAAAAATTTTAGTAAAAACAATTCTACCAATTATTATCCTTCTTTT
CAATACGATTCTTTTCAACAACTTCCCTTCTAATCTTGCTGTTTCAATACTCTCTGTTAT
TCCTAAAGCTGGTAACTTATCTTTGCCAACTAACTATCGAGGCATTCAGATGCAACCTAT
GTTAGCAGCATTATATGACAGAATACTAGCACAAAGATTGCTAAAGTGGGTCAAGATAAA
TGTCGAACAAACAGCTTTTCAGAAAGGGAAGGAACAATTGATCAAATTTTTATTCTGCGA
ATCATAATTGGACTTATTAGAGTTAATAAATCAACATTATATATAGGTTTCTTTGATTTA
TCTAAAGCTTTTGATAGAGTTTCACGATTTCTTTTATTAAAGGCTCTACTGAAGATGGGA
ATTGGTTATGTGATGCTAAATGCACTGAAGGGCATTTATCTCAGTACTAGATGCGTATTA
AAAAGGTTTCGGAAAAACTATCCGAAGTCTTTGAAACTTTTACTGGTATTAAACAAGGCG
CCTCGTCATCAGTTATCCTTTTTANAGCTTTTC
>cap3_Contig430
AAACTTGGTCAGTGGCAGGCCTGGGGCGAGTTTACCTCGTGCAGCCAGACATGCGGAGGA
GGTGAACAATCGAGACAGAGGAAGTGTTCGCATGACGATTCAAGTGTGAGGTTGCTCAAA
TGTGAATCGGCGATGAATAACACAAAGGTGGAGAAGGAGACGAAAAAGTGTAACGAACAG
CCTTGCAACGGCAACTGGGGAGCATGGAGCAACTACACCGCTTGCAGCAAAACATGTGGA
GAAGGGGCCCGCTTACGTCATCGTCTCTGCAACGACCCCATGCCATCCACGGGAGGCGAG
GCTTGTCTCATGTCAAACGGAAGTGGGTTGAGAGGATTGAGGGAAAACCAAACGCAAAAC
TGTGATACCACCAAAGACTGTGTTGTGGACGGAAACTGGACGCCATGGGGTGAGTTCGGC
GCATGCTCAGTCACGTGCGGAGGAGGAGAGCAGGCACGCACACGTATCTGTGAAAACCCA
CGTCCCTCCACGGACGGATTAAAATGTATCTTCAAGCATCACAATACAACACGAGGAGAT
GAAGAGAGTAGAAGAGACAAA
>cap3_Contig431
GAGATTTGCACTTGCAAACGGAACCAAAAGAGCCACGACCGAGTTCCTCTAATACTTCGT
AATAATTGACCATTCCTTCCTCTAAAATGTTCACACGGTTCTCGACAGTCGGTAGACGTT
TACGTCTTTTTTCAACGTTTGCTAAACTATTTTCATTCACAGAAGTTTTCTTCACAGATT
TGATTCGTTTTTCGATAAATGATTTCTTAATTTGAAGAAGATTCGTTGATCCAATACTCG
ACTTTAATGCATCTCCTTGACTTAATCTCTTTAGACGTTTAATACTCGAATCACTAGATC
TCAAATCAGGTAAACTTTTCTGTTTGTTTGTAACAATTTGTTCAGAAGTTGCATCAACAA
CACCATCAATGCAGCTAACAGTAGTTGTACTATTTGTTGCCATTGATTCAACACTTTTTG
ATTGAGCGCTTGAAGCTGCTAGTAACTAAATAAAATGAATATACAATAAGATAAAATAAA
ATGAGACAAAATCCAGAAGAGCCATGAAACTCTACCCCTAAAATGAAGGGAAAATATAGA
AAAATTGGGAAGCAAC
>cap3_Contig432
GGAGAAAATGGGAATAAAACGTGATCAACTTGAGCATCCACAACATAAATTGAAACATGC
TGGTGGGAAAGGATTGAAACTCTTGGGCAGTTATCCGGTACATATACAACACAATGAACA
TTCAATTGAAGACATCATTTACTTTGCTCAAGGAGTAAGTAATATGTATTTATCATTAAC
ATCGTGTAAAAAACTATATTTGATACATGAGAAATTTCCTCACATAAAGTTAAATAAAAA
AGTAAATGTGGGAATTAATTTAAATGAGACAGTTCATGGGAGAGAGTTACCTACAATTCC
CAGTGAGATTCCATTTCCTGTCACTCCAGAAAATATACAGAAATTGGAGAAATATTTGTT
AAATGTATTCTCTAAAAACGCATTTAATACAGTTGATCCACTTCCCGCAATGTCAGGTGA
ACCACTCAAAGTTCATTTGAAGGATGGTAGCCATTCCATATGCTGTGAGTACGCCGTTAC
CGATACCACATTACTAGGAAAAGAATTAAGGCACAGTTAAATAATGAT
>cap3_Contig433
GTCACAACGGAGAAGTAGCAACAGTACAATCAAAAGCTCGATGGAGGGATCAGTGAAACG
CAAGCGCACAAACTGCTCACTCAAATCGTCAGTGGATTGCTGTACCTTCATTCGCATGGT
ATTCTTCATCGAGATCTGTCACTTGGAAACCTTCTGCTTACAAAGAACATGGACGTGAAA
ATTGCAGATTTTGGGCTTGCAACCAAGTTGAAGATGCCGACTGAGAAACACTACACCATG
TGTGGTACACCAAACTATATTTCTCCAGAGATTGCGACGCACAGTCCTCATGGATTGGAG
TCTGACGTGTGGAGCTTGGGCTGTATGCTGTACACGTTCATTGTTGGACGACCCCCGTTC
GATACCGAAGGAGTACGATCAACATTAAACAAAGTTGTGCTGGCAGAATATAATCTACCA
TCGCATCTTAGTGATGCAGCGAAAGATCTTATCTACAGATTACTTCGAAAG
>cap3_Contig434
TTGTATCCACTTTATTTATAATTTTTCAGTAAATTAATACCGTCAGCAAGGGCAAAATGT
TTGTTCCTTTTGATCTATTTTTCCCATTTGGCAAAATTTCAAAATTGTACTTAATTGGTC
AAGTATTTTTAATCAACATTCATATCATCTATCTAGATTGTACATTTAGGTTTGTCTTCT
AGAATGCAGAAATAATCGTTGACTTGGATTTGGACCTTCCTTTGTGCCCTAAATCTATCA
ATTTTAAGTGTACCATTTTAGGCCTTTTTTGCTAATTTCGTTTGATAAATCGTCCCTATT
ATGCAAAGAGTTGGGTACGTTTTTGGCTCTTATTTCAACGATATTTATTCGCCCCAAATG
AAGGTATACAACTTGTTCTTTTATCATTATCTACTATTTCATGCCCCAAGTTTGGGACCA
ATTTGTAGGAAGTTGATCAACCCTAGACAGTTTTATGATAGTTTAACTAATTACATATAA
TACAACATATATAATATAACGAACTTCATTATCTTGTCATTTATCATTCGATTATCTCTA
TCAAAACCATTACATTTCTAATATGCGCACATCCTAATATATGTACATATTAAATAAATC
ACGGTTTAGTGCCTGTTTTGATAAGTATAGATGTACGTGTACACAACACGAGCTAACGAT
GGGAAATAAGACGTTAAGTGATGTCAATTATAATAACTACGACGATAGCCAAAGCTAAAA
GATAAACCATCATGCTGCTGCCTCTTTCGCTCGTAAAGAATAGTATAAAACCATATAA
>cap3_Contig435
GTCGATGATAACAGACCCGTGTTTGCGCATTCCATGATAAACGTGAACGTCAGTGAAAAT
GAGAATGTCGGACTTGTCGTTGCGAAACTAACAGTCGTCGATGCTGATACGACGAATTTC
AACGCCAATCGTGTCTATAAGATCGTCCAAGGAAACTTCCCCGTCACATTTGCTATCGAT
AATAATGGTATCATCACTCTCGTAAAACGAGTTGATTCTGAGACGCTGCAATCAAAGGTC
TTCAACTTACGAATCACCCTCACTGAAGGCACGTGGACGGTCAGCGCATTCGTAAACGTC
ATGATAACAGACTGGAACGACAACCACCCTCATTTCCACACGGTAGGTGGCCGGTATGAA
TTCACCATTCAAGAAACGAAACCGGTCGGAGAAATCATTGAGATTTTAACTGCGGTTGAT
TCGGACATCACACCAATAAATTCCGGCATCACTTACAAATTACTGACTGCAAACACGGAT
TTCGAAATGAAACGATCCCGTTTAGGACACGGAGCCTTGTTGT
>cap3_Contig436
CACAGACTCAATACCACGAACACCATCTCTGAAGCTGCTCCTGTTGGAACCACGGTTGTC
AAGGTCGAAGCAACAGATAAGGACATTGGAGCGGGTGGTCAAATCGTGTACAACATCACA
GACCCAACCTCTACCTTCAAGGTAGGATTTGACGGAAGCGTCATACTCATCCGGAAACTG
GATTATGAGTCGGTACAAAGTTATAATCTAACAGTGACTGCAAGAGATAACGGTAACATG
CAATCGACCAATCAAGCGAACATCTTCATTCAACTTGTTGACGTCAACGATAACATGCCA
GTGTTCGATTTGAAATATTATCGTGCCATGGTTCACGAGAACAGTTCAATCGGCACAAGT
GTTCTCACGGTCAACGCACGTGATAATGATCGCACTCGAAATTCCATCCGATATTCCCTC
GTGAATAATCCAGATGCACAATCGTTCGGCCTGAACTCCATCACAGGTGGGCTAAGATTA
CAGCGATCGTTAGAC
>cap3_Contig437
GCGGAAGACTAAATAAGGATCTATCAGGTATTTGCATTTTATCACGTGCGTGTCTACCAA
CCACAGTGCGCCGAAAACAATTAAGTTAAATTCAAACAAAAATTAATAACAATAAAAATA
AAAGATTCAATGAAATTTTTCATCATTTACTAGTTCTTCCTTTCTTCTCTTTAGGCGGTA
AAAAGTTAGAAAGATACCCCGACAGTGATGTAGGCATAGCACCGAATGACGGTTCAGTTC
CTGTGATGTTTAACGTCGACCTGTGTCGTTTACTTTCTCGTCGGTTATGAGTCGTCGGCT
GTCTCGGGATCGCGGATAGATTCGAAAAATTCTCCAACCGCAAGTTTGAGATGCTCCTAC
TAATCAAATAGGAGTTTGCCTGTCCGGCGTTCATTCGACGTCTTTCTATCACCGTTGAAT
TCAAGGGAATTCTATCAGCTACATCGGGAGTACGTATACAATTCTTTCTCGGATTCAGAA
GAGATTTCTTCCTTCCCCTCAGGGTCGTTGATACGGTTCTACCGAACGAACCGTCCA
>cap3_Contig438
AGAGAGTCAAACCGTTCCATGTGGTGCTGCCCAAGGATCTATAGCTGGACCACGAGTATT
TAACATCAATGTACGTTCCCAGCCTCAAGTCTTTAAAGCATCAGACTTTAACACTTCATC
ATTTGCTGACGACTCAAATGGCCGTCGCACATTTGCACTGACCTTTCAATACGAAATCAT
CAAAAACAACGTAGTAGATTGTATGAAGAAAATCATTAATTGGAGCCATGCTCATTATAT
GAAAATAAACCCCGATAAGACAGAAATACTACTTCTTTACCCAAAGAACTTGAAGAATAG
TGTTATTATGAAGGGTATTATAATCAACGATGAATGTATACGGTTCTCAAATTGTGTTAA
AAATGTAGGAATTAAGATTGATGAAAATCTCAACATGGACAATCAAATAAACTCACTAGT
TTCTCACTGCTACAAAATACTTAAAGATATTGGACGTGTTAAATCATTCTTTCAAAAACC
AGATCTTGAAGAATTAGTACATTCTGTCATAGCTAGTCGACTCGATTACTGTAACTCGTT
ATATGTTAACGTCAGTAAAGAAACTTATTCAAACTCCAAAAAGTACAAAACAGAGCAGCA
AAGTTAATCTTAGGAAGAGGGTACAGAGCATCTGCAAGTAAGGCTCTAAAAAGNTCTACA
CTGGCTTAATATAGAGACTAGGATCAACCTTCAAAATCCTACTTATTAT
>cap3_Contig439
GAAATCTTTGTTGTTGTTGTTGTCGTCGGGCGATTTTGTCGTTGTTATCGGTTTTGACTT
TCTTCTTTTTGTTATTTTACCTTGTGAGTTGATCTTTCGAATCTTTTCAGTGTCCGGCCC
TTCCTCTTGTTTTTTCTGAATCTTTTTTAACTTAGCACGTTGATTTTGGAACCACACTTG
CACGACACGAACACTGAGACCAGTTTCTGTTGACAATTGTTCGCGAACCTTTCGGCACGG
TTTTGGTGTTATTTCGAACGCCGCTTTGAAATCTTCTCGCTGCTGTGACGTCAGAATAGT
TCGCGGTCGTTTACAAGCCGACGACGATAGATTATTTTTGTCGTCCAAACTTCGGGGAAC
GAGGACTTGTTGTCGACATACTTTCGTACTCGTCGGAACTGAATAAATCAATGTCTGATC
TTTGTTCAGCCACATTGAAATCTGCACTGCAATACAACTTATCGTCTTTCAGAATGAACT
CATCTCCTTTCTCCAGCTTGTCACCGCACTCGTCGCATTTGAAACACTCGACGTGGTAAA
TCTTCTCGAGAGCTTTCATCACGAGTTCGTTAGGAGAGATCGCCAGCTCGCAGAGAAAAC
ATTTGCTGCCATAAAGACCGAGTAATCTAGTAAAATCCTCCATAGTTTCTCTATATTTCT
ACCACTCAGTACTTGCTTCTTTTAGAGTTTGTTTGATGCCAATAGACTGCATTCAACATA
CATAAAGCAACTCACCGCATCACAGTAAGTGTTTATGAGTTCGATCAGTCTATTGTACAC
ACAATCAGTGAA
>cap3_Contig440
GGCTTTTTAATGGTTTTGTTGGATTTTTAATGGTTTTGTTGGATTTTTAATGGTTTTGTT
GGATTTTTAATGGTTTTGTTGGATTTTTTTTTCATAAATTAGTTAGCGTCCACGATCAAA
TAAGAGCGTCCAAGGGGTGGATTTTTTTTTCGATAAGAATAAGCGTCCATGCCCGCTAAT
TCGATAGTCGAGAGTACTTCACATGATAATTAAATTAAACGTTGAACATTGAGAAGTTAG
TCCAGCTCAGAGTACCACTCAACTCCTACCAATGAACTTGAGGTAACTCCAAACGTTGAA
CATTG
>cap3_Contig441
TATGGGCGCTGAATATTATCGTTATGCATCTGACATTACATGTTCATTCCCTGTGAACGG
GAAATTCACCAAGAAGCAAATTGAGATCTACAATGCAGTATTAAAAGCGAACAGAGCAGT
GATGGCTGCGTGCCGGCCAGGGGTCAGTTGGACTAAAATGCATTTATTAGCTGAAAAGGT
AATTCTAGAAGAGATGGTTAAAATGGGGATTGTGCGAGGACATGTTGATGCCATGATGAA
GGAGAGGATAGGAGCTCTTTTTATGCCACACGGTTTGGGGCATT
>cap3_Contig442
AATAACGACGTCAGCAGTTCTATGGCGTGACGTTACAATACTGCCGTCGTTCGCTTGTAC
GGTGAATCGGAATTCTTTATTAAGATCGTAATTTAGAGCTTTAGTTAATATCAGATCACC
TGATGGTTGCACGGTGAAAAACTGTTTTACCAATGTGTCGGAGATGGTATACGTCATTTG
GTTGTTAAGAACCGACGCGTCAGAATCTGCTGCTGAAAGCGTGAGAACAGCTGAGTTTAA
AGACGTCGAATCGGGAATTGTCGCCGTGTATAACGATTGCGTGAATATTGGATTGTTGTC
ATTCACATCGGCGACATTGATTGTCACGGTTATACGATTTTGACGGAATATTGGATTACC
GGCATCTGCGACTTGGATTACAAGTGTGTAGAGCTTGGTCGTTTCATAATCAAGTTTTTT
CAGTGAGCTGAGGTCGCCTGTGGATGATTGAAGAGCGAATTGGTTATTGGTATTTCCAGA
TACAATTGTATACATCAATGTCGCATTATTTCCAAGATCAGGATCAGTCGCACGGAGTCT
CAGCACGACAGAATTAAGGACAGTTTCTTCAGATAACGTAAAAGTATACGACGCTTCACT
GAACGAAGGAGTGTTGTCATTTACATCCGTCACCTTCACCGTCACTTTACAAACGGCGTA
AAATACGCCGTCGAAGACCGTCACAAAAATATCATGTGCATCTTGTACTTCCCGATCGAG
ACTCGCCTTCAATCTGATGGCACCTGTCGGCGCGTCAATTTCAAACAGGGAACTGGTACC
AACAATTTCATAACGGAAAATCGGATTACTATCGGCGTCCGATGCGACGGTGGTTACTAA
CGATGATCCTACACGCGTGTCTTCT
>cap3_Contig443
GTGTACATGTTCATTTCGTCACCGTCAACCTGAGCAATAACCTTTAGACCGGCACGAAGG
GAGGAACTCAATGGGACAATATTACGGACGATGAAACCGATGTTTTGAATATCATGTGAT
AATTTCCGCCCATTCAAATGATTCACAAGAATGCGTTCGGATCGTGCAACAACAATGCCT
TTCTCGTAGAGGGGAGATTCTCGGGCTGACCGAGAATACACGTACGAACCAACTTCTGGT
AGTGCGTCGTAAGGAGCTTTCGGCATCAATCGTAAATCTGCGATCGATACTTGATTTGTG
GTACCATCTTCAAACTTGACGTAATAACTATAGTATCCTGGATTGCCCATGATCGTCAAT
ACCTTCCCTGGGTGAAAACCCTTGGCTTCTTTTGCGGTTTTAGCAATGACCTTGAACAAC
TTTTTCACTTGAACTTCTTGGGGTGTAATGTTGAGTATAATAGCTGCTGTATCGTCACGA
TCGTGGGTAATATGTTCACCCAGCTCTTCTAAATACACCTCGTTCT
>cap3_Contig444
AAGGACTGTTGATGGTCCAGGTCCATTAGCTAACATAGCATTCCAAAAGGGTGTGAAGAA
TGGCCGTAAAGGATTGGAGCCATTTTTGTATGGGCCACTGGAAACGGTGGTCGATTTGCT
GATTACTGTTCTTGCGATGGGTATATCAATTCTCCGTACACGATCTCCATCGGAGCTGTG
GACAACTGCGGGCGTAAACCATGGTATGCGGAAGAGTGCCCAAGCACATTGGCTGTCACG
TACAGTAGTGGTGAAAATTCCGGCCAGTTAGACAAACAGATCCTCACGACAGACTTGCAT
GGTGGGTGTACCGAACATCACACTGGTACATCTGCTGCTGCCCCGCTCGCTGCAGGTATT
TTTGCGTTAGTTTTGGAAGCCAATCGAAAATTAACATGGAGAGATATGCAACATTTAATT
GTTAAAACCTCCAAGGTTGTCAGTCCAAAAGATCCTTATTGGAAGAGAAATGGTGCAGGT
CACAAAGTCAACCCTCAGTTCGGTTTCGGTGCCTTGGATACGGGAGATCTAGTTAGTGAA
G
>cap3_Contig445
AATCAGAGAATCAGGAATGACCCTCAACCCTGGAAAGTGTATTTTCAGTAAAGATGAGAT
CCCCTTTTGGGGGATTATAATAACAAAGGATGGCCTCAAACCGGATCCAAAGAAAGTTGA
AGCTTTGAAGCAAGCCTCGCGTCCAAAGACAAAGGCAGAATTGTCATCATTCATGTGCAT
GATCCAATCAAACCATGATTATATACCCATGTTAGCTCGAAAAACCNCATCTACGCAAAA
GGTTGAAGAAACACCAGCCTTTTACATGGGATAAGAACTGCGAGAGGGAGTTTAATCAGC
TTAAAGAAAGCTTTCGCAATGATACACTCTTGCACCACTACGATCCAAGTTGCAAGACGT
TCATCTGGGTTNATGCCCACATTCATGGTATCTGCTATACTGATGCAAGGTAACTCAACT
GATGAAGCTAAGCCAGTCGCTTTTGCTAGTCGATCAACAACACCCGTTGAGAGGA
>cap3_Contig446
CGGTTTTACAATAGTAATAAGTTACACTATTACTTAAATATAAAAAACAAGTCAACAGCA
CAATAAACGAAATATCAGAGAAGGATATCAGAGCATCTTCATATAAGGAGTAAGTAGCGT
GTTGTTATCAAAAACAAACGAAAAAAATCTACCTGGCCGGCAGGAGAAAAAGTCGAGTTT
ATGTGATTTTCTAACGGAAAAAAGTGGAAAATCCCAAGATTTAAAGAGTTATCGGTTAAG
AAAAAATATAATTTAAGTATTGCAGTGTGTTGAGAAAAAGTCGAGTCCAATAAATTAAAA
CAACGTTGCAAAACTGAAGCTTTGCCGCCATTTTTATATCACCCACGTGGGCCTCGTGTA
GAAATGTAGAAATAAATTTAAACCGCATAAATGGATTCGTGGATTCAAAAAACATGACAA
AACAATCAATAGGAAATGAGTTACTTCCGCTAACTTGATATTAAACCTTATTCATTTGGT
GTAGAGGCGAGGATTACGTAGTGTAGGAAGAAAGAGAAAAGGAGGATAGATAAGCAACTC
ATAAATCACACAGCGAAGGGCAATGA
>cap3_Contig447
GTTGATGGTTGGCTCTGATGATACATCCAACAACATTTCTATTGTTAACTTATGGCCATT
TAGAGCAGCATAATGTAGTGATAAGAAACCTTGTTTATCTACTTTGTGAGGGTTTGCACC
ATATTTCAAAAGCAATTCCACAGTATGTGCATCTTCATCTTTTGCACATGCATAATGCAG
AGGAGTACAACCGTTTGTGTCCTGCTTGTCCACAGCACAGCCTTGTGTCAAAAGAATTTT
AAGACATTTATGGTGGACAAATGAAGCTGCATAATGTAATGGAGTGCGACCCAATTTATC
TGATAAATCAACTTCTGCACCTTGTTTAACTAGAAGGTGCAAACAATCTTGATTTCCAGC
ACAAGCAGCACAATGTAATGGAGTGCGGTCATTTCCATCAATTGAATTTACATTACAACC
GTTAGTTATTAAAGTCCTACTACAGTCCGCAAAGCCACCAAGAGCTGACATATGTAATGC
TGTCATCCCATCCTCACCTCGCGTAAAAGGATCAGCCTTTTGTCCAAGGAGTTCAAGTAC
AAAAAGCTCATGCCCATGCCTTGCAGCTAAATGTAATGGTGTATTTCCTTGTTATCCACT
ACATTCACTTTTGCACCTTTATCAACTAAATTACGTATTCGAGACACATGACCATGTATT
GCACAAATATGAATTGTGTACGTCCATATATATCAACATATTCGGGTCAGCTCAGCATTA
AGCAAC
>cap3_Contig448
CGCAAATTCGAGACGATGGAATCTCCTAGGAGACAAACCTTGGGGTTTAATACCTTCATC
ATTCTTTGGTGGTCATTATGCATCTCAATCCACCCAGGTTTGTCCCTATCAATAGGTACA
GCACATTTCGGCTTGTCTTTGAAGACATGGCAATACCTTTCACCATACATCTTGGATCAT
GTAAAGCAACAGATAAATAAACGGGAGCATATCTATACATATCTAAAAACATTATCATCA
TACCTCTTGCACTTGTATGTTAGCTTGTTTTATGATTTATTAAACATAAAAAGTACTACC
ACTTAACTGTTAACTGTAAATAATTTCGAATCGCGTTCGCACGTTTCGCACTACTACGAT
CAACTATATAAATTCGCAAAACGTGTCAAAGTATGGTAATAATTATATCATCAACACGGG
TTAAATAAATCAATTGGTTTATA
>cap3_Contig449
GGAAGATACGATATCAAGCATCAGCAACGATGAACAAATAAATACGATATTCAGACATCT
CTTCAACTATGGATACGATGTGACTCTTCTCGACCTTTCGGTGTTACCACAAGACAGTAT
CGGTGTTAAATTCAGCAGTGTTGTTAATGAACTTCAAATCATGGATAGACTTTGTTCGGC
AGACGCCGTCATACTCCTAACGAACGGATATAGTACTTGTACGGTGGAACTGACGAGGAA
TATATCAAGGGTGCTTTCGAAGAAGCTGAAGAAAACGAATATAACGAATGAAAACGGTAT
CACTTGTACGGTACTTGGTGCATGTACAAAGAAGACAAAAGTTACAAAAGAATTATGGGA
ACTTTTTAATCAACAACACCAAAAACTCGATTTTAGCAGTATATTTCCATATGACTCACT
GAGGCCGTATCGACTCGATTACTCAAAGGAATCTGCACAGCCGACAGTATCATAAGATTT
TATTTAGAAATAGAGAAATATTTTTATATGAAATAATTGTAAA
>cap3_Contig450
AAGCACTTATTCTTGAGTTATCAATCATTTTCTGAACTCATGTCAAAAATCTTGGCACGT
TTCCTTAAGTGTCACGCTAGAACAGCTGTGATACAGTATTATGTTACAGTATTATGATTT
AAATGAGTGATTTACATTTGCTGAATGAAACCAACTCCTGTGCTAAATACTGCAATTTTA
CCTGCAGTGATTATTATCGTTCTTCTTGTAATAATAAATGTTCATTTAGAAAAACCCATT
TTTGTCTATGTCCAACTTTGCGTAGGTCAACATTTGGAGATTCTATGGTATGAAAATTAA
GATCAGTGTTTGTACAAGGCAGTGTATCCATGTACGTCTGACTGATCTGGAAGTTATACA
GCTTGCGTAGCATGGATAAACATTAAATTAAAAAAAAAAACTAAGTAATGATTTATAATA
ATAAATAAGAATAAAAA
>cap3_Contig451
CCGAACATTTGTAAGCACCACGCAGTAAGGAATACCTTCCTGAAGATTGTTTTACAGGGT
TTATTAGAAGGAAGAGAGTCGCCGGAAAGCAAAGTGATGAATAGTTTCACTGAAAACTTA
TTTTCTGATGATATTGGCGATATTTCTGTTATGGTGCAAAGATTTATCATCGAGATGTTC
GATCTTCCAAACAAATGTACAGTAAGGAAAATCATATCACTAACTTCATGTCTATTCTTC
GTCAAAAAGCCAAAGCCTTGCTCGCCTATGTGGAATCTTCTAGCCGATCTGGTAAATCAC
CTTTAGATGCATCACAAATCAGCCAAATGAAGAAAGATCTACTCTACACGTCCGACGACG
ATTTTCGTATCGTACTTGCGATCGCCGAGAAACGGCAACCTGGTTTTGTCGCCTTCCTCG
ATGAAGAACATGGAAAAGTAATCAGAAATCTAGAAGCCTTTTAATTTTAGTGCATTTTTA
ATGAGGCGATATGATAGAATAATGTGGAGATAACAAGTTGATTGGGTTGTGATAAGCTAA
ATCTGGCTAAATAGCGGAGACGCAATGATGTAGATAAAGTCACTCTTAATATGCAATCAA
ATAAGATAAGAGGAACTATTTTTGACTCGCTTTTTATTTGAACAGAATTCGTCATTCCTA
CGAAAATGCAATGCATGGGCGATGATTCCGACC
>cap3_Contig452
AGGCGTTCAAGAAAGAGGAGTTCTGCAACTCCTAAAAAGGATCTAGATAAATCATGGCGT
AATCTTGACTCTGGCAAGAAACCAGAAAAAATTGTTGTTGATCCCTATGCTAAGCGTGTT
ACAATTGAATATGAATTTCCTGATGATATGTGTGGTCGTTTAATCGGAAAATCTGGAAGA
CATATCAGTGAATTCAAAGAATCTACTGGTGTAGATATTTGCATTGAATGCGAGTTGCAT
GGAAAGAATAGAATTGTTAGCATGACTGGTGTCCTGAGTCAAATTCAGAATGCAGAGAAG
CAACTCAACGAGAAATTTAATGATTCTCTTCTATTAGTCTCGCATCCTGATATTTCAGAG
GCAGAGAAGGAGGTCTCTGTTATAATTTTTCCAGTAGGACACTGAATTCAATGTTGTAGT
CACAGCAATTATTGATGTTGCTAAATTTTATGTTACAAATGTGTAATCATGAT
>cap3_Contig453
AAGTAACGAAAGATGGTGACATAAGTGACCTCGAATCATGTAGTGTAGTTATGGAAGAGG
AAAAAGAATTGGATGGTGGAATCATAAGTGCGACGTATGATGAGAATCTGGATATGGGCG
TTGTTGGAACTTTGGTTGGTACAGTATGGTACATCCATTTCCAGGAGGAATCTGAAATTC
ATATTGTCAGTGGGCATCATCAACAGATAAATCAAGTTGTCATTTGTAGTGGAGACGACA
ATTATTTTGCCACATGCAGCAAAGATGGTAGTTTGAGGTTATGGAATTCAGTATCAAGGG
AACAGACAGCTCAATTCCTTGTACTTGGACAGGAATGCAAATGTGCGACGTTCTGTTCGA
AACCACGTGAATTACTCAGTTCGGAGATAAGTGCTTACAACCAGGTCATCCACCCTGTGA
CGTCACATCATAAGGAGCATCCATCGCACTGTATCGCAGGGTACAGCGACGGGACGGTGC
GAGTGTTCGACTTTGGACGTATGGAGAAATTGTTAAAGATGAAACCACACTCGACGCCTG
TTGTGAAGATTCTTTGTCCTGTTGACGGTCGAGTCATAGTGAGTGGTAGTGCGTGGGGGA
TGCTAGCTATCAACAGTTTGAACAACGTGGGTTAACACTACGCATTC
>cap3_Contig454
TTTTGGGAAGAGGGTGAATAAATGACTTTTAAGACATAAAAAAGCAAATTAAGCTTTGTT
TTTGTGAAAGTATTGAGGTCTCCTTTTGCATATAATTGGCCTACTAGTAACCTTTTCAGA
CAAATATGGGTCTCATTTTGGTCTCCTATTTGTAAACATTTGGTCTCTTAGCGATTTTCG
AACACTGCATCTGAAAATTCTCCATTAATCATTTTGGTTCTGGAATTTAAAATTATCTTA
TATCAAAGTAAACGTTATGCAGAAGAAGCTTAGTTACGATTAGAAACTAATTATGGTGGG
GAAAATATAAGGGGTTTTCCCCAAAATATAAATTGGGTTTATTTCATTTTTTAGCTATGC
AGATGGCTGCTACAACCTTTGGAGAAGCAGTTCAAGAAGTTTACGAAGACGATTGGACAG
>cap3_Contig455
CGCATTATTAGGTCATGACCTGTGATTTCGAAATAGTTCTTTAAGTTACTTTCGAAAATG
AGACACAACGTCAGATAATATAAAATATTGATCGTGCCTTATTTCTCTCTCTAAACGCCC
CCAGCATCTGTAGAATCGAAAGGTGGGGTTAATGTAGACGAAGTCGTGATTCATGAAATG
TTTCTTCAATAACACCAAGATAAGAAAATCGAGATACCACATTATAGAAGTTTGAAATCT
CATTCTTTTGCTATACTTTTTACTTTTTTTTCTTTACTTTTTTACTTTTTCTTTTATTTC
AGCGAACGAGAGTTAATTTTAGTGACATTTATAGCACATAATACGTAAGAATAAAATTAG
ATACAGATCTACAACATGTAAGGGATCGCCTTCGAAAGCAAATCTAACCGGTAAATTTGT
TGTAAAATTACACCATTAAAAATCTGATTGGTTAATCAAAATTATTTTATCTATTTTTAA
CTTAAAAAAATATATAAAATGATGATATTTTAAAATGAACCAATCAGATTCTTGACGATG
TAATTTTAAACCAATCAAAACNGACAAATTTACCCATAATTTGTTGACAATCCCTACGTG
AGAACAAGATCTTACCTGTATTACTTTCGT
>cap3_Contig456
ACAGAAGTGAACTTCAAGTGTATCAATTTGACATTACTATAATGGCGACGAGGATTGTTG
GACTTGGTGTGGCTGTTTTGAGGCTGATGTGATATATGCACCAAGAGTACGAAGATAGAT
ACAGGTTTAAAGAAAGAAAACGAAGTGATAGCACACTGCCTGTCACACTCAAATCCAGCA
GTGGTACATGAGGTAAGACGTATTATTACCTTTGCCCTGTATTTCTCACGGATCATCTCA
CTTCACTTCTAGCATGAGCACAGTAATGGAACCCCGGTGTACACAGTTATTCTTCGACCC
GGATAAGCATCCAGAGGATACTCTGAAAGCGTTTGATGAATTCACACAACTGTTCGATTT
GAGATATGATGCACAGTTCCCTGATCCACCGAAGGTGTCAATGGATGCAGCTATGCAACG
GTGGAAAGTAGAGAACACAACAGAAGCAATTACAGACCCG
>cap3_Contig457
CATTCCATGAAATAAACTAAATCAAAAGAGGGCACACACATGTAGCCAAATAAATTAAAA
GCTGCATATTATAATATCTATTGTACAACCTAATGATATTATTGGAATATTAGATATTTT
GAAATATGTATTATATTCTATCTTTTTTCTCTGCAAAGAAGTTTCTAAGGACGTACACTT
CTACAAGCGCAACACTGACAATAATGACGGCCTGTCCTAATGACCAATACTGTACACGCT
CATTAAGATACTCAGCCATATCTCTTGATGTTGCTTCCCTCAATCGATGATGAGTTTGGT
AATCAATAATTACTTTTAACGACTCATGAATTTGAACAGCTGAGGTTTCAATCTGTGTTA
GTGCTTTGTGATGTGTTCCAATTGCTTCAGTGAGAGGTAATTCGTCACCAGATTGGAAAT
CGAAATAAACTGTCTTGTGAGAGAAAGATGAGAATTCGTTGCTGAAGC
>cap3_Contig458
GCTTAGAAACGGTTACAGTAGAAGTAATACAGAAAGTTATGCGACTTCTTGCAATACACA
ATCATGTCCAAAATTGAGTACGATCACCCTAATCATGGCGATCATTGGAGGCTTGATCTT
TATCACACTTGGAATATTGTCTTGTTTTTATTTGAAGAAACCACCGAGAAGAAACACAAC
TGTCTGTATCGGGGAAGGACCAGCTATGACCAACCCAGCGTACACTCCAAACCGTTATGC
TGGACAACCGCATCCTGCTAGTCATCCTTATCCCACAGGACAACCTTATCCCACAGGACA
ACCTTATCCCACAGGACAGCCTTTTCCGATTCTACCACCATACACCGTTCTAAATAATCA
TCCTGGGGAACCTCCTTACCATCCGACACAGCCATACCCAACTGGACAACCCTATATCAT
TTCACCACCTCAAACTGTTGGACAGACTCATCCAGGGGGGCCTTCTCCACCACCTTACAC
CGAAGATGTTAGACGTTCTCAACAAGTTGGACTACCTCAACCCCAATCAA
>cap3_Contig459
CGAGAGACTGTGATGTCCCATCGGCGGCATATGTTCCACGCTTCCAGTAGACGGTGCAAC
AGGGTACTTAAATCGCGGCGACGTGACATCCTCTTGCCCGGTATGTTGCGGCAGTGACGT
CATGTAGCCTTGGTACGAATTGAACGCTTTGATTGCAACATTCTGCTCCGATTGATGGAT
TGATGGATTGATGGACGGAAACCGACTGTGACTGGAAACCGAATGAGACGGAATAGGTTT
ACAAGGATACATCGAAGGCCGGACAGGTGGCGAAGAGGAAGGATGATTCACAAGCTGGAG
ATCTGGAAGCGATGTTCGTAATCGGCGTCCTTTTATATTTGCTTCGTCGAGACTTGAATT
ACCTGTCGGTGTTCGCTGTGATATTAGCTCTTCTGTTAAAATTCCTGGCATAGAAACCTT
TAAGATGGCATCTTGATCAATGGACGATTCTAATTTGCGTTGAATGAGACCAATGTTA
>cap3_Contig460
ATCAACTAACAGGGGGCGTTAATCAGTTGGTATGTATCGCTCGCTGGTTCATCGTCTTGT
GATTGGTTGTTGATCATATCATCATCTGATTCGTCAATACTGATCGGAGAGTGCCGATCA
TCCAATGGAGCATTTTCATTGGTTAATAAATTTGCAAGAGATGGACACTTTCCCTGTTTG
CATGTGCTTGGGTAACAATCCTGATGCAAATCACTTTGAATCAAATCCGCCATCTGTCGG
AGCTTTCTTTTACGAACGTCGATATCCGGTAGTTGCATCTGGACGGCTTTTCTGTTGACA
GCAGACGAGTTGTTTGTTTGTGACCCAAGAACCACGTGTTGTAAAAGGACTCAAGATCCG
AAGTGATATCGTACGAACGGTCTTTGAGATACGCCGGAACACTGTTCGGCTGTGTTTTCG
ACTAGGGAGAGGCCGATGAAGC
>cap3_Contig461
TCAATCTTCTATGCTTCTTCGAATTGCAGTATGGACGACGAAAAGAAACACAAATGTGCA
TCGTTCGACACCCGCAAACCGATGTACTCCAACTGTACCGACATCAAGAACTGCCAAGTG
TATGTCGAGTGCAGGTTCTGTTTCGTCGTCTACGCAACCATCAAGAACAAGACAATCCCT
CAACTCGCAGGTTGTATGGGGAAGGGTCACGAGTGTCCCAATGAGAACACCAACGAGTGT
GTGCTGAAACACAAACGCAGACATGCGCACTATTGCTGTTGTTATGGTGATTATTGTAAC
AAGAATATTATCATTATTAAAGAGAATTTGATTCCGAAGACAACAACTCCTGGACCAACT
CTTCTCGTCACAGAAGTTCCAAAGGAAGAGAAATCGAATAAAATCCTATACATCCTTCCA
CCTGTCTTTGGTAGCATCATCGTATTAGCAGTTCTACAAAAACTTTGGAAAAAACACAAA
CGAGCCATGTCACATGGGGTACCATTACTTCCTAATAGCCCCCC
>cap3_Contig462
TAAAATTCCAAGAGTTTTGTAAAATACTTTATATTTCCATGAATGTAAATTGAGGGCCAT
TATCTGTTATAATTATATTTGGCACCCCATGTCTATCAAAGGAGTCCTTGGTTGCTGCAA
TAACTGACTGTGCTTCCTCATTTTAAGTTTATAATCTTTGGATACCCTGAATAATAATCA
GTTACGATTAGAAATTTATTGCCTGACCACTCAAATAAGTCAGACTCTACTCTTTCCCAT
GGTCTTGCCGGGAGTGTTCGAATCATCATTGGTTCTTTAGGATTCACTGGTTTTAGCTCT
TCACATATTTTACATGCTGAAATCAGATCCTCGATGTCGATATTCATCCCTGGCCAATAT
ATGCTTTGTCTAGCTCTGTCTTTGCATTTCTTCATCCCAAGATGACCAGTATGTATAGCA
TCTAAAATAATTTTTCTCAACTTTTTTGGAATTTCTATTCTATCCATTTTAACCAGTAAT
CCTTTAACATATGTAAGTTCATCCTTAAACTTCCAATGGTGTCTAGATTTTAATCCACAC
TTATTTTATCCTTTGGCCATTCATACCTAACCATGTTCATCACCTACAATTCTTCATCTT
CTGTTGCTAATTTTATTTCTTGTAATCGATTTTTCTGTTCCAGGGAAATTCATTAACACA
CAACTCACATAAAATT
>cap3_Contig463
TCGATCATCATCTTCGTCTTTCAGATTGTCGCTTGCGCGATAGATGTCATGGTAATCACC
ATAATCATCAATATACCCGTCACCATGAATGTATGTTTGGTTGTTGTGTGTACGCCGATT
ATTGGAAAGAAGTTCATCACGTGCATCGGATTGCACGTGATTGTTTCTGCGTCCAATACC
ATCCAAACGTACTGTACCAAGTCGATCATGTACCCTCCCTGACCGTTCTTCACGATCACC
GTTTCGTAATGGTGCACCTAATCTATCATGAACTGTATCTCCATCATAGCGATCACCAAG
ACGTTGCTGAAC
>cap3_Contig464
GCAAATCATTGCGCACAATGAAATTCAACACTGTAAATAACGGGAAAGATAAGGTTCCAG
CCCAACTGGTTAAGATTTTACAATAAAATCACCCTTCGCCTTCTTCGGCACTAAGTCATC
AATTTTCAAACAAATGAAGTAAATCTTTAGTCCGTGTCAAAATTATAGAACTACTTCTTG
GCCATAGCTTTTATGTTTGCTTTTATGTTGCGAGCAGAAAGGCTATGGCTACTACAAAAA
AGTAGTTCTATTATTTATAGGAACTATAGGAACGATGAAATATAATTGCATGGAAATGAT
GATTAGTCGAATGTCCTCAACCCTAAACAAAACATGACAAATAAAAAGGTAACGATTCTC
CATATGCTGATAATGAAATCAGGAAGAAACTCGATGAAATATAAAAAAGTCCATTGACAA
TCGTTAAATGATTTTAATGAAATGTATTATAACGCCGTAATCAGCGAATGGCAGGTTTTA
AC
>cap3_Contig465
GAGAAAATGAAGTAAGGATGGAGGTAGAACTGGAACATAAACATGCTGCCACAATAGAGG
GAAGAATAAGGTTGTCAAAGATTCTGCCACAAGCATTAGCTTGTTTAAATCGTTTGACAA
AAACAATATCTGGTGTTCCAATAACATACATGTAAATAGATCAACAAGATTATCAAATCC
CAGTGTCATCAAAACATCTTTCATAGAATAATCGAAATATGGTAGTTCATTCGTGTTAGG
ATTATGTAATACATTAGGGTCGCCGCTCAACGCAACACATTTCAAAGTGGTTCCTGGAGG
AGGGGATGGAATTTCATATAAAATATTGTAAATATAACTTTCAACTCTCAGGTCATGAAG
ATCTTCGTTCAAAGCAACAGTCAGTATGTCTTCCAGGCATTGTCGACTCAGTGAACAAAT
GGCTTTTTCATCAGAAGACAGATACTTTTAGACACATACAGATTTTCACTGCTCGCATTG
AACG
>cap3_Contig466
GGGACTTTGAGTAGTGAGTTGGTAACTGTCCTCCATATGCATGAATAATGCGTCTAGTGC
TTATACAAGGCTTTTTTCTAATATTTGATACAAGTTACATTGATGTGTTCTTATTCGTTT
AGCCCTCTAGAGCTTCAATTTTACACGAGTGTCTCTGCAACTATAATTCAATTGCCTTTC
TGGTTTTTATTAATGGACATGCACCAGAAAATCCAACACATCGACCAATACAAGATTGGT
ATTTTGTTATTAAATGGTGTTATCTTTTACGCACAAAGTTTATTTGCTTATTCACTGATG
TCACTCATTTCTCCTATAACTTTCAGCGTATCGAATACAGTGAAAAGAGCTGGCCTCATT
TGGTTTTCGGTACTCGTTTTCGGTAACGAGGTGACAATACTCGGTGCGTTCGGTACCTTC
TTGGTCGTATTCGGAGTCTTTCTCTATCAACGCGCTCGGCATATTGAATCGCTCGACCAG
AAAGTTCTTTTGGAACATAAAGCAGACGATGATGCGACTGAAAGTTAACTTTTATTAA
>cap3_Contig467
GGGGATCTTATTTTGTTCAAAATAACAGCGAACCGATCGAACAATTTGTAACTAGACTTC
GTAAACTCTCTTTATATTGTGAGTATGGTGATAAAACAGATGAACACATTCGAGATCAAG
TCATAGCTAGTTGTACATCCACAAAACTAAGACAAAAATTATTAGATGAAAGTAATCTTG
ATCAAGATAAAACAATTAGCCTCTGTAAGATTATGGAAGCTGTTAATTTAAAAAGTGATC
ATATCGAATCTACGAATAATGATGGTGTTATGGTAAACAAAATGAACTATCATCAAAGAT
CTGAAAAATACCAACTAAATAAGAATTATCCTAAACATAACTATCGAGAAAAAGCAGCAC
AACCACCTAGATCCCAAGTTATGTGTGGTTGTTGTGGTGCTATGGGACACACCTCGAAAG
ATTGTAAAAGAACACAAAACAAAGTCTGTGACAAATGTAAAAAGCCTTGACTACTTTAGA
AAAAATGTAGCAGATACAAAACCTTCAAGTGTTTCACCACCAAAACATAGGACAAACAAA
GACATACCGAACCACAATCTTACACCACATAACAAG
>cap3_Contig468
GTCTTATTCAAAATGTACGTAATTTTTATATTGTCTTCCCCTCTGATGTCACTGCGCATA
TTGATTTGATCTTGACATCTGCAAAAAATCTTACCGCATTATCTCTCCTCCCAAATCCCC
AACCTTTCATACTAAGGGTGTATATTCTGTACATCTTACGAGTAAAAAGATTTTTTCGTC
GCCATCTTATCAGCATGCAGAATATATTTTAATGACAGATAGTGAATCTTTTTGGAAGTT
AGTTGGAACTATATGTGGTTGAAATCAACTACATGGAAAAAATTATATTTTCACGTTAAA
ATACATATTAAGATGATTAATTTTGATATTTGAATTTATTCAAAGTTTGCTTAATTCATT
TCGACTCTCTAGTCTAGAAAAACATTTCTTAGCCATGTATGGGATTTTCCGAGGTCAAAG
CTCGTGCGATGCTATTTTTACAGAATATACACACCTTGTAGCATACAAACTGTACTATCG
TCTTGTTA
>cap3_Contig469
CTCGCCATGAATTCCCGCCAATGTACATGTACATCATCATTTTTTCACCCTTTTTCATAT
GTGCTATTATGCTGCAAACAGAAATTCATTATGTCATTATTTCCAGTATGTCCATCCAAT
ATTAACTAATCATCTGTTGATCTTAGCTTGCTAATTTGGTACTGATTACATTATATTCTC
CAAGGAAAAGATTACCAACGATACTTAACTATGTATTTTATTTACTGTTGATACATTGTG
TGGGTGTGTGTAACTTTTTATCGAATAAATAGTTGATCAAATATTCTAAATTCATCAACG
ATTATTCCTTCCATTACAGAGAAAAGTCAAATCGACCAATGTATTTGGTGTTCAGTAATA
TAACCAACCAAGAGTAAATACCGTCTAACACAGAAGTGTCAGTCTCAACCATGCCCCCTC
CAATAGTCCAAGGTCCAACAAGGTTATGGTGTCAAGAAGTCTAGCGGTGTGTTT
>cap3_Contig470
CACACGTATAACTTCTTCGTGCAGTTGCCATTGCCACAATGAAACATATCGGGTCCACAT
GACTTTACTGGACAATTCTTCTCGTCGGACTTGTCAAGACAGTTATTGATTCCATCACAA
ATAACGTTTCTCGAGAAGCATGTTCCACCATCACATTCGAACTGAGTCGTTATGCAATGA
GATACATTCAATTGTTTGATGCAAGACTTCTTGTCGTCGCCAAGGTGATATCCGTCAGGA
CAGAGACATTTTGGACCACCACTAGGAGTTATCACACAAAGAGAACACGGTGACCCCACA
CATGGATTGTGACTCACCGGCTGCAACAATGGATGCATGACCTTGAGTCCAAAGAACTTA
TCTTTACTCTTTATCAACACTGATAAATCATCTCCTTTCCATCTGTGAATACGTTTGATT
GTGAACGGGCGCCACGTCGTATAATACAAGTAGTCTTCGAACAAGGCAGCGCATATACTT
CCCCAACTCCTTGTTTCAACACATAACGTTTAAAATCGTTATTTCTTAGCACAATATACT
CGATTCGCTTATAAGCCATATCACTCCAATATAACGTGTCGGTGATTTGATCTAACGTCA
ACCCGTACGGGGATTTGATATTTTTACGGACAAGTTTTAGAGGCGACGACCCGTCCATCC
CGATTCGTGATATGGACCCTGATTTAGAGAACTCGTCAGGCTCTGATGTGTAGTAGAGAT
ACCTTTAGCAGGATGACAAACTATCGATAAAGG
>cap3_Contig471
CGACCACAAACGTGACAATGTGACTGGTTATTGTGTTGCAGATATTCACTGTCCGTGTGT
ACACGAAGGAAGAATCTATCCACCTGGTAAAGTCATTACAAAGAAACCATGTCAACAGTG
TGTCTGTAAGGCTAAAGGGTTTGAGTGTGTCAAGCACTGTCCAATTACCAGCTGTCCAAA
GGATTATGAGTTGATCCATCACAAAGATTCGAGATGTTGCGAATGTATACCAAGACGTTG
CCCGCCTGGCCGCACTCACGTCGATTGCGGTTGTCCGATCAAATGTCCGGCATTGTTAAC
AAACAGTTCGGGCACTTGTGATCGGCACAGTTGTGTCAAGGATGTTTGTTTGTGTCCGGA
GGGGAAGTTCGACAACGGAACAGCTTGTATTGAGAAGAGCGAGTGTCAATGTATAGTGGA
CGGGAAGATACATGAGCCTGGCACTCGTTGGCCGAGAGGTGATTGCGACGAATGCAAGTG
TGTGGATGGAGTTGTGAGCTGTGGTAAAGTTTGTAACATCACCGTCTGTCCAGACGGTTT
CGAGCTGATTTCACCAGACGATAGCAGCGACCAATGTTGTTTCTGTAAACAGCTACCTAC
TACTGCACCACCAACAACCACTTTACCACCAACTACAA
>cap3_Contig472
GGGATTTGAGAGAGGGTGGCCCTATTGGGGTTTTCTATACATTTATTAGGACGTCATCAC
ACAAAAATGCTTACGTCAGCAAAATGACGAACCAGTTGAGCATATACCAAGGACTATAAC
TCTGCCTTAGCACCGTTTTTAAGAATTTTAGAGAAGGGGTGAAATTCTCCCACCACCAGT
ATAATAGCTCTTAAGAAGCCCAGTACGTCGGTGACAGGTTTAAAGGGGTACAAGGGACGC
GCGAATGGCAAAAAATATTTTTGTAGAGGCCAGACGCTCGAGAAAAATTCTCCCAGACCC
CATAAGTCGTATCTTCAGGCAACGTGTGGACGCCAGATGCCAAACGTATAACCTCCCATG
TTAGGGTTAAGGATATTTTACTCATAATAATTTTATTTTTTCATCAGCATTTCGTATTTT
GAGAACTCCCGTCTTCCTCCCCAGCCATTGTCTCTCTTCCTGTGTCCGTGAATCCATCGT
CTTTTCGATCGTACAGCCAAACAAATGGTAACGTAATCGAAAATGAAGAAAACAATTACG
AAAACAGTACAAGAT
>cap3_Contig473
GGAGTTTTTACGCGTGCATAGCCGAACATTTCTTGCGAGATGGGTAAACAGAAATCTTTT
GTGGGTGAACGGAACCGGCTGGCTGTTGCATAAACAAATAGTGTCCGTGTTTTCAGCAGC
CGCACTTTTCTTTCTCTTCCGAGTCCGGCTCTTCCTTTTCTTTCACTAGCAATGTTCGTG
ATGGAGTTCCGAAGGCGTCTCATGCTCTTCGTTCTGTATGATATCCACATAAATCTGTTT
TGCTATCATCAAGTAAAGCATCTTCTACGTGTTCTCCTGTATAAGCACTGGTTTCAAACC
TACGGTATAC
>cap3_Contig474
TTTTTGGAAATATGACTATCAGTATAGGAGGAAGATGGTGATTCTTGTATGATAACAACA
TTGTTTGGAGATTCTCTATCCTTTATAAAAGTTGATTTAGAAGGATAAGAACCAAAAAAG
GGCTGATTTGTATCAATACCTGAAATGCCTTCTATTTCAATATTGAAATGGACAGATGAT
ATCAAATGTTCAATTAAACTCTTTGCAGACTCCATATTTTTAGAGTCACGGACAAAGGCA
GTTGATTTGTAATTTTGGCGTAAAATTTTAAAATCTTCTTTAAGTACTGAGAAATAACTT
CCGATTGTTCCTTCTACCAAGGTATGTTTAATCCAAACTTTACAACGGGTCAGCATCGCT
TTGGCGTATTCTTAATCGATAAATCATTTTGACAGTATCTTTTGGAGAAATTCCTTCAGC
AACAAACCAGAACGANGGTTTTCCAGCATCATTTATTGCTTTTAATTC
>cap3_Contig475
AAAGACAACTTACTGTGGGGCAATAAAAGAATTTCTTGCTGGTGTTGGTCGAAAAGTTGT
TATCATCAATATGGACCCTGCAAACGAAAATATGCCTTTCGCTCCTGATGTAGATATCTT
CGATCTTATTCACTTAACAGATGTTATGGATAAACTGAAGCTTGGACCGAATGGAGGCTT
ATTGTATTGTATGGAGTTTCTCGAAAAGAACTTTGAAATTTTTGAGACGAAACTAAGAGA
ATTTCAAGAAAAGGAATATTACTTTATATTTGATTTTCCAGGTCAAGTCGAACTCTATAC
TCATCACGATTCCGTTAAGAATATCATTGAGACGTTGACCAAATTGGATTTTAGGTTAGC
CGCTGTTCATTTGGTGGATTCCCACTACTGCAATGATGCTGCCAAATTTATATCAGTACT
ACTGACATCTCTCTCAACCATGCTTCAAGTTGCACTACCACACGTCAATGTATTATCAAA
AATGGATCTGGTAGAAAAGTATGGAAAATTAGCATTCAACTTGGATTACTACACTGATGT
GCTTGACCTGAATTACCTGTTGGATGATATGAAG
>cap3_Contig476
GTTTGGTTTATTCATCATATCAGAAACATCCTTCTTCACGGCAGATATATATGTATGTTG
TTAGGATTCCGGATGGATCTTTCCATGGAATGTAATATCGATTTGTCATGTTTGTGTTAA
GATTACACCTTTCATCTGATTCAATATCAGTCACTACAGGTTCTTTTTTAGCCGGATTAT
AGAAATACTCTTTCAAATTTAGTGTACGACAACACCCATTGAGGTCGTCCAGAAGACGTG
TTTTTTTTTGGAATCTTTGTACTCGTACAGAAGTTAAAGCCTTTTTCAAAAACATTTTGT
TCTGATTTACATAGGTTTTTGCGTGGCGCAGTTTCTAACGGGACTGTAATCTCATTTTTC
GGATGCTTTTTAAGTATTTTTCTATCCGGTGTTATAATAAACCGATTTGATGTCTTAATT
TCAGTGTTATCTTTTGATTCGCAGTGCCTATCTTTTGAGTCGCTGCGATCTCCGCGGCAT
TTCCCAATCTAGATCCGATCGTTTACCAGGTATGATCGGTGCTTTTTTATAACTTACAAC
TCTTTA
>cap3_Contig477
GAGATGTCGACGACCCAGGGATGACGTTACTTGATAAACTGAATGCTTCTATTGTTAGCA
GGGAATGGATAGGAAGATACATGGGCCTGTAGTCGATGGCACACCCCCATAGGTGCGTGT
GGAGAGTAGTGACGATCGTGGGGAAGGTGTAACCGAGAATTGGGTAGTCTTTCACATCCA
TGAAGTCCATCAACTGTTGTAACCAATGTTGACCGAAAGGTAATGTTTTATGATTCAGCG
TACCACCACGCAATGCAACAGAAACTTTATTATTCTTTCTTGCCGTGTTTGCGTCAAATA
TAGACTTCATCGCCAACGACAACATGGCAACATTTTCCGTACCGACACCAGCCGCCGCAC
GACATTTACTCTGTACTGTCGGTTCTGACGGATAGATCGTCTGTACTAAATTTCGACTGT
TCATTGCGTCGTTCATGTCGTAAAAATGGACAGATTCGTCGATAAGAGGCGAATGGAAGA
CTTCGAGAGTCGAGGCATACAGTTCCATGAAATCTGTTGTTGGACTACCTTTGTAAGCTG
ACGCATAGAACAAATGTCCATTATTGATGTTGAGTAGAACGTGTGCTAAAATCCTCTTTC
TCACTCGACATAGAAAGTTGCAGTCGAAGAAGCGGTTGGGTCAGCATCATCCTTGGAA
>cap3_Contig478
GCGATTTCAGAGGGTCGAGTGCGGACAAGAGTACCATGATTTCTACCAACCATCGGTTTG
TTTGCGAGATTAGCACACACATTTTGTACCAGTACGTCTTGTTGGTGCTGTGGTGCTTAT
TCGTCGCCGGAATTCTCATGTCGTCTGTCGGGTTTATTCTTCACTTGTTCGATATTGCGA
CAGTTTTTGTGAAATGTTCGCTACCGAAAACCGAGTTTAATCAAAAGTTCGGATTGGAGT
TGTTTGTACGTAAGCCGATGTACCGTGCTTGCCGGAAATTAACCTTACGGGAGATTGAGT
ATATGAGGTATATACGGAAACATGATTACGCGTTGTATCATGGGATTGTTCGCATTATCC
AACCGGAAGCCGAAATGCCAAATCATCTGTAATATGAATTCGACTTATGGCATTGATATT
GAGCTCTGATTTATACACAATTTTGAAAGGCACACAGGGGATAGG
>cap3_Contig479
AACACTAAGAGCCTCACCACACCACTCGTCGACCTCTCGACGGCAACTACTACGACCACA
CCTGCGAAAACCTGTCATCTGCATTGTCATCCTTACAGATTGTTCACGTCGAACCTGTTA
TTGTAAACGAAGTAAACGAAGCGCCTTCATCCGCCATTGTTGATTTAGCGAATGATTCCG
ATGATGTCGTAGTCGTTGACAACCCTGTACCTCTCTATATTGAACTGAATGCTGCATCGT
GCTCCGGTAATGAAAGTTTGAGAAAACCAGATCTGGTCGACTTCAACTGTGACTTACTGG
AAAGCCCCACCCCTGAAGACTTTGTTGTTGTATCAAATTATTTCGACTTATCGGTTCCGA
TTGATGACATCCACGTATTGGAACATCGGAACTGTGAAAGTTGTCAGAACTGTCACGGAA
ACTATACTCCAGACTTCATTCGATCTCATTCATCATGCACAACAACTTCTTCGTCAAACA
ACAATCAGCTCCCTATGGATTTGGTTGCTTCGGTCCCTCCATTCCAGAATCAACCTGACA
TTGCAT
>cap3_Contig480
GTCGATTTCGATCCGTAGAGTCCGTGGTACACAAAGAAGTCGTCTTTCTGTTTGTGGTAG
ACGGTTCGCATGTCGATGTAACGGACCCCCCTCTCCAACTGTACCCCGACATTGTACCCC
TGTGTTAGGGACCATTTCTTGATGATTTGGCGGACGCTTCGATATTTTCCTAAATCTTTG
ACAAGGCCGGACTCGCTTGGAACAACTGGCCAATTCAAGTTCAACCAGAATGCACCCGAG
TCGTGCGACCCGGGAATCGCCAATTTATTCAACGGGACATTGTGCAGTTTATCGGGTAAG
TTCGTCATCCATTCGGATAAATCTGTTGTGTTTATCGACTGTGTGGAATGGGGCGCAGAA
TTTCTCCTTTCCGCCATGATGCGCTTTACTAAATGCATCCACCATTCTTCACTGCTTACC
ACAACAATCAGTATACTGAAACATAACCATATCACTTGTGCTCTGGAAGAAAACATCGTT
CAAAACCTGTTCAAGATGCATAACGCATTGCACTTGTCA
>cap3_Contig481
CGTTATCAATCTCATCACTACTTTTTCAAAATATTTTCTTCTCTGATCTGTCATATTGTC
ATCAGTCAATGTCAATGACAACTTAGAGATGACTAACATAACATATAGTTGGAGAGAAAA
CTGGAGATTTAGCGGGTACTGCTTCGCATAATTTTGAGCTTTTACAATCAACGGAGAAGC
ACCTATTGAGCAACATCATAACTAGATCGCATTTACTTAAATGACAGCATAACGTCGCGC
ATTCAATGACGTCTTTCATTTTACCGCGATCTTTAAATTTACCTGAATCGTACCCACCGC
GCAATGTTACATTGTAAAAGACTTTACTCCGAAAACAGGTCGGGTCGCTGTTACCGATCT
TTATGTTCGTCTTATATTCAGCCACGCCGTTCACATCGAGATTGGTATTGCTAACCTGCG
TTGTATTGTACATAGGTGTCACAAAACCATCTTTACATCCTTGAATTATTCAAAAGGTGT
TTGTCGAGTTCAAATCGTTCACAGTTG
>cap3_Contig482
ATGAAAACTTGAACACGTGGTGGTTTATGCAAATTTGTTGGATGAAAAGCATTTTTCTGA
ATGATTGTAGAACGCTGTGTAAATAAAAAAACATGGATACGTCGTACTCAAGTATTCTCC
CGGTCTTAATACTTACACTATGCATTACATCCGTCCACCCGTCCGACACAGAATGCCGAG
TGGTCGACCAATGTACTTGCCGGACACCGTCCGGATGGGAATATTCTTTATGGGCGATCG
ATAATAAAACAGTTCCAACGTTTCACAATATTCGTGGCGAGGACTTCCGTTCACCCTTCA
CCTTCGATTACAGCCCTTGCACTCCTTTTACTGACGGAAAATGCAAAGATGTGTTTGTTT
GCCAGAAGTATAAACACATGCTTAGTCATACGTACGCAATTGGAATGAACAATACATTCA
AAGCTGAGATGGTTGAAGGGGCTGTAGAATTTCATTATAGTGGTCATGATACAAGAAGAG
CAAGGATAATTTGAATTGTGATCCGAATG
>cap3_Contig483
GTTGGTGTCGATAATTTCTCGTTATTATTAGCCAGAACGTCTTTTTCGCTGCATTCTCGG
AACTCGCTTCTTCGTTGATAGATTCAAACGACGGGAAATTACGAGCATTCGAATTACGAT
AACGAATACAAGTCGTTGACGCCGCTTTTGTAAATACATCGTCGTTATTTTTTAAATCCG
TCGACGTTGTATTTGACGGTAAACCGCAATCACATTTCTCGTCGTTGTTATTAGAGCACG
TCGCTAAATGTATATCATCGTTTTGCGGCAAAGAAACCTGTTCGCTTGAATTCTCTTCGA
AAGAGTCACATTGCGTTTTCTCTTCACTACTGCTATTACCGCCATTCGATGCGAGACGAA
CTGCAAAGCCGTACTTCAACGATTCTCGCTGTGGTTTCGGCGGCGCTTCTTTCGATCGTT
TCACGACTGCATCATCGACGGTAGCAGTCGGCGTATAAACACCATTCTCATTACTCAATA
TCAAACTAACAACTTTTTCGTAAAGCCTGCGGTGTCTTCAGCTCCGGCGCTTTTCGATCG
CTCTGGTGGCAGAGGTGGCGGTGTTAATTCGATATATTCATCTGTGGTAATATCGCCGCT
GCGAATTTGAGAATCGAGTAGTTCGACAGAAGATGTTTATTTTTCGCGGGATCGGATCTA
AATACGGGCGGTCATCGTCCGGACTGAGTTTATTTGGTCGCCGTTGAGGGACGGCAATGA
GAGCGCGCCTTTCATATTTGATGCATAGCGATTAGCGAGTTGAACAAATCGCGGCGCACC
TTGGAACGATAACGGGCGATCTTTTCCGATCGGTTGCAAACACATTTTCTGTTTTCGATT
CATCGGGATC
>cap3_Contig484
CGATTATTACCATTCTTATGTGACGTCATCTAGCGGTATAGAATCCGGGGGTTCGTCAGA
AAATATTTCCTTAAATAGCGAAGATATTATTTCGAGTGCCGTTGTCGGCGTAGTGGCGGT
GTGAAAAATTCGAGTTGAAGATTCGAGTTGAAGATTCGAGTTGAAGATTCGAGTCGCCTT
CGGAAAGATTTAAAAATCAATTTCGAAAATGTGGGTTTAGTTGAATCAAAGAAAATAGAA
AAAAATGTTGAAATTTACAGAATTATTATTATCATACACTATTTTGTTTCCTTTTTCTCT
ATTTTTTATCTCGATTTGAAAATTTTTCAGAATTCTTTAATAATAATATTAATATTAATA
ATGATAATAATAATAATAATAATTTATGCAACAATTTTACGAAATCTGTACAAAGAATAA
TTTTACTTTGTTATTTAAATTACAATTTTTTCCTTTAACGTTTATCTTTTTGGTCCTTTT
ATTCATTTTCATTTCAATAGTTGATTTTTTCA
>cap3_Contig485
GGATTGCTTCATGTGCTTTGGTGTACATGGCTTCGATCTAAAAAAAAACACAGAAAACAT
CCTGATGTCGAACGGAATGAAGTTTCTAATAATTTACAAAAGAAACAACAGGAAACAATT
AAAAAGATGTTGAAAGTCTTCCAGCATATTACTAACATTATAATAGCAACAGCTCTTAAC
CTTCCTAGTCGTTCTTGGCACAGGGAACGAATGTTCAGCTACTGAAAAACTGTCCATAAG
CCTTAGGTGCCTAATATGAAAACTTGGTAAACAGATTTGATCATCAAAATCTTAACCTAC
AATAAGATATTTTTCAAATTTGTGATTTTTTCCATGACCAAGTAGCTTTTTTCCAGGTAC
TTTAAGAT
>cap3_Contig486
GCCGTGTATGAATGGAATTTGTGGAGGGACCGATCGAGATACAAGAGTGTGCGACTACAA
ACCATGTGGACATTGGGTGGCGTGGAGTCGTTGGAACAGCTGCAGTTCATCGTGCGGCGG
TGGTTCACAATATCGCCGACGCCGTTGTGTCGGCGGTCTGTGTGACGGAAATATACGCGA
CACCATCGGATGCAACATGATGCCATGTGGAGATTGGAGCATGTGGGGGAACTGGGGGTC
TTGCAGTACCAGTTGCGGAGGAGGTTCACAGTTCCGATATAGAATGTGTGTTGGAGGGAT
ATGTTTTGGATCGAATGGAGACTCAAGAACGTGTAACACCTTTACATGCGGCGTTTGGAG
TACTTGGGGCCCATGGGCGACCTGCAGTATGACTTGTGAAGGAGGGAATCAATTCCGATA
TCGACTCTGTACTTCCGGAATCTGTTCGGGTTCAGACGGAGAATCTCGGTCATGTAATAT
GGTTGGATGTGGCAATTGGAATGAGTGGGGATTGTGGGGAGCGTGTAGTGCTTCATGTAA
TATGGGAAATCAATTCAGATACAGAATATGTTTCGGTGGTGTATGTCCTGGAGAAACAGG
GATGTCAAGAGTATGCAACGCCATTCAGTGTGGT
>cap3_Contig487
GTTTTAGGTGCTTTCTCTAGTAAAGTAACAGGAGGTACACCAAGTACTTCTACAATTTTA
TTCATTTGATCAATTTCATCAGTACCACTAAAAAGTGGTTCACCTGTGTGCATTTCAACT
AGTATACAACCTAATGACCACATATCAATAGCAAGATCATAAGGCAGACCAAGTAGTACT
TCCGGCGAACGATAAAATCGACTTTGTATATAATGATATAATGTCTGTCCTAATTGACAA
GAACTACCGAAATCGACAATTTTAATCGCACTGCGCTTTGGATTACACAATAAAAACATT
TTCTGGTTTTAAATCACAATGTATTACTTGCAATTCTGGTGTAGCAAGAAAACAAAGTGC
NGTACATAACTGTTGAGCAAACTTTCTCGTCAAGTTTAACGACACACCATGGAAGTTCGT
ATTTCGTAGTAAATCGTACAAATTATACGA
>cap3_Contig488
ATTGTTATATTGGCCTATAAAAAATGTACCAGTAGGGCAGAAGAATATAAATAATGGTCA
ATTGTAAAACCTTTTTCATAGCACTAAAAAGTTAAAATTCATTATTCACTGCAAAGGAAA
CATTTTCCGCAATTTTTCCAATATGAGCCAGGTAACAATAGTCTGTGGACTCAAACGAAT
CCATGCAGGAATAAATCCTTTATAAAATCCACCCATACCATTGGAAGCCACCACATCACG
AGCACAGTGAAGAACACTTGGGTACTGACCAGGCTTGGCATTCATAAGCCTTGTTTTCAT
AACATCAAATGGCTGAGTAACTATAGTCGCAACTGTCCCTGCAATGACACTGCTCATCAG
ATGAGTAGGTGTAGTGTCGCCAAAAATACCACTTGCTATTAACATTTGTTTTGTTGATCG
TACACAGCAACTTGACCCATCGTAATCAACAGACCTCTTGTGCAGTCATTGATACACCAG
>cap3_Contig489
TCCCATTCCAATGATATAAACCATAAAATGTTAAACCACGTTGACCGAAAGCAGTACTTA
CAGCAGCATTTGGATCCAAATCGTAATATGGAACCATCAACGTTATTGCAGAACTTACAC
AAATATAAGCAATAAAACAAACAGTAATAGTTCCCAGTATACTAAACGGTATTGATTTAC
CAGGATTTTTTGCTTCTTCACATGTTGTTGCGATAATATCAAATCCAATAAAAGCAAAGA
AACATGTGGATGCACCCTGTATGATTCCGCGGAAACCAAATGGTGCAAATGAAGTCCAGT
TTTTAGGATCAGCATGCATGAATCCAACAATTGTTACAACTAATATTGTAAGAATATTCA
GCACTACAAGGAAATTGTTTAATCGAGATGAGTTCTTTACTCCTAACGCTAAAATTATGG
TGAATACTACCACGATTAAAACAGAGAAGACATCAAAATAATGACTTAATCCAGGAACGT
GAATTTCTCCAAGAACAGCTACAGTGGAATTTTGCAAAAATCCTTTTGCT
>cap3_Contig490
GCCAAGCTTGATAAGAAAACGAGTGATCTTGAGGAACCAAATTACGACAAACCTGGTGCA
GTTTCCGACAACAAACATTTCTCTCAAAGGTATGGAATAAGTGTTTCTGACTATCGGTAT
ATCTATAACAAACTTGATTTTCCAAAACTTACAGTTCACAATGCAAATTACCATACCTTA
TATGATAGTTTTGGTTGGATGAGTAAATTTGTTGATCCAAAGTTTGATCACCATCTTGCT
TTAGGTCGATTATGGATGCAACATGCACTTATTTTAGCAGACGCTATCGTAATACCGTTC
GATCTGACAAAATACGCCAAGCAAGTACAGAAGCTCTTCTTAGAATTAGAAGATAAATAC
GAAAGCGTGCTGTCACAAAACAAAGTATCTTTTGATTATGCCAAAAGTCGATTAAAGACA
TTGATTTCGGACACTGAGTCATTCCATAAATATGTAAAAAAAGTTGATTCGTCAAAACTG
GATCCCGGTAAACTTCGTTCACTTAATGATAGAATCATGCATTTTGAGAAAAACTTCATA
CTTGAAAGCAATACGGGTAAACTAATGTTGAAACATATAGTTTATTCAACACCGGAATAT
TTTTATGGGAATTGTTTTTTCGATAACAGAAGATCCCGGAGAGGATTGGGATAATGTGAG
GAAAGAACTCACCCTGTTTGTTGGTGCGTTGACATGGCAATCCGATCTATG
>cap3_Contig491
AGAAAACATGATTCCTGATATACTTGTACAATTAATTGGCACGATAATTGATGGAGGAAA
ACCAAATAGAAATTTGAACGAGAAACAGAAAAAAATTGATTTGAATATAGCTGAATTAAT
AAAGTTTAATTCTATCAAACAAACACGGAAGGAAACTATTAAGAACTTTCGTCATTCTAA
GGAAAATGAACCTTCACTACCGGTATTCGTTGGGCTAAGTCTTTCACAGTCTCGAAATAA
GAAACAAATTACTTTTATGCACGAGAAAGGTTTGTCAATAAGTTATGAGAGAATAAAAAC
AATCCGTTCATCGTTAGCTTTTGAGTTGAATGAAAAGTATCACGAACTTGGTCTTGTTTA
CCCTTCACAACTCCAAAATAAAACATTTACAACATCAGCAATAGATAATTTGATTACAAT
CTGCAATCTTCTACAGCTAAAGAATCCATTCATTGGACTGGTATTTCTATATTTCAATAT
CCGAATTCTTCATCCAACACATCGGCCGTTTCCTCATACAGTAATTATGATCCCATGCGT
GGTGGTAAACCTGA
>cap3_Contig492
CGAAGTGTATTATTGTCTCTAAAACGCCATAGTAAGAAGCTGAAAGTCCTCTATAAAAAC
CTCTGATACCTTCTTGTTTATATGTTTTACGAATACATTTCATCATTCCATATTTACTCT
GGTTACTGAGCTGTAGCCTTGTTTTTATGAACCAAATAGGAGAAGTTAATGTATGTGTCA
CAAAACCTGCAGATGCACCAGCACACATATGCACAAGAGGACTATCTTTTGGTACTCCAG
AACCTGTTATGTATTTTGTAGATTTTGCATACACAGCAAAATAGACAGCACGTGCTGGAG
CTACACCAATGAGATTTGGACCCAAACCTTTATATAGAGAGCGAACTCCTTCTGTCTGGC
ACATATGCCTTGCGCAGCCAATAATTCCATATGGTTGAGTAGCTATGCCAACTTGTCCAA
CATTTGTGTTTAAATTTGGAACATTATGAAATGTAGGTACTGAAGCCTGGAGTCTTGTCT
TGATGACTTCCAAAGGGCAGTGTTGCAAATGCAGCAACGGTNACCACCAACTCCTCCAG
>cap3_Contig493
AAAAACGTCACGACTCGTATTATGAAAGCGCAGACGATGAATTTAGACAACACGTTCAAC
AGACGGATCCTAGACCTGAAGAGACAGTACGTGAAAGAGGCGTCGGCTGTCGATCGCAAA
CTGAGGCCTTTGATAACGACCAACTATCAACAGATCGAAGACATGAAGCAGCTGATCCAA
GGGGTCGATGACGCCATTTGGGCCCCGGGTGATTACTGTATCTTAGCCAACGGCGCGTGT
CCAAAAGGCTTTCATATGGCGCATGGTGAAATGAGGGCAATCTCGATGTATAGTTCCAAC
GGGACGTATATCAAAGAAGCGACCTTCGGGGAAGGCAAAATAATCGTGTCACGGGAAATA
GTGGACAATTTGGGAAGTTGGGTCGGTGGATTTGACGATATCAGCCTGTTGTAAATAGAA
AACTAAAAG
>cap3_Contig494
CGTTGTCACAGTGGGAACAAACCTTAACACCTTTTGATATTCCTTAACACCTTTTATTTC
TTAACACAAAATTTTTGGTGTCATAGGTGGTGTTAAGCATATCCTTGACACCTTTTAGTG
GGAACCAAGCTTTATAGAACGGTTTCTTATAAAAATAGAGTGTAATTGGAGTGAAAGATC
TCAAACAATTGATTGATCTCTGTATAACGGTCTTTATGTATCTAGTTAAGCATTTGACAT
CTACGTTTTATCTTAATTTTTTAATTTTTATTTATTTCTTAGAAAAACTTTATCAAAATG
AATATTTAACTAGTAGTTTTTTGTATTTATTGATGTGAGTCTTCCTTGATTGATTATGAA
AGCAAAAGCACGAGATTCTGATATTTAGTATATTGATGATTTGTAGTTTGTTTATGCCTT
ATTCAATGAGAAG
>cap3_Contig495
GGAATCAAATATTTCTAGGCACCTACATTGCAATGTTTCTTGCAATGCCATTTGCATATT
TTCTAACTGAATCAGAAGGCTTTTCAGGGTCTAGGAAAGGAATCAAAGGAAAGATCTACG
AGACGTTTGTTGTTTTATTGCTCTTACTGGTTCTTGCGTCGACACTTGTTTGGGTCTTTT
CTGCATTCACCTCGAAAAGAGAACTTAGTTGGATAGCTATTGTAACAGAGAGCTGGACAC
CACCCTTACCTTTTATTTATTCATGTATTTCATCACTTGGTGCTTTACTCTTATTAGTCT
GTGCACCGCTGGGCTTTACAAGACTGTTTACCATACTAGGAGATTACGTTGTAAAACCTA
AATTCTTCGTTGATCTCGATGATCAGATCAAAGCATTGGAATATGAAGAAGAAAGTCTCA
GAATGAAAATGAACTCTGCTTTGCTGAGTTGATGAAAATAATGGAATTTACCTTTACAAA
AAACAACAAATGGC
>cap3_Contig496
CTTTCGCGGCCAGACACCTTTGCAGATCAGCCCAACCGCGAAATTATTGCATTTCGCGGG
TATTAACTTTCGCGGATAGAGGATTCTCTAAAAATAGCGGGAAAGAACTTTTTCAGGAGA
AAAATGAAAAGTATATTTTTTCTTATTTTTCAATCAATCTGTGTAACTATATAGATCCCC
TACATATATTTTAACACGAGAAAAAGTTAAATTTCGAATTAAGTGAACATTTCGCTGAAA
TAAACTTTTGAATTTGATTTTGAAAATTTCGTGGGAATAAACCGCAAAATTTTCTGGCTT
AAACGTATATTTACCGGTACTGTTATATTGAGAGAGTTTTTAAAATGGCGAAAATTTCTT
GAGCGGAGGTATTTTTCCGAGCGCCCTTATCTACAGAACATTTACAAAAGCAAACTTTTT
TAAGTATCACTGACATTTATGAATCCATTTCTACGGCGGAATATAATATTTTACCCACAT
TTCTACGAATTTTCCTATATTTTCAATCCATTTTAACAAAAACTAAACAAAACACCAGTT
ATTAGAG
>cap3_Contig497
CCCCGAAGTTTTGAAGACTGGGAATATTTTTGAATCAAATTATTCAGTATCCGATAAAGA
AGGGTTAACCAAACTACATCGCGATTTGGAACCGTATTTGATAAGGAGAATTAAAAAAGA
TGTCGAAAAGTCGTTACCCGCTAAAGTCGAACAAATTTTGAGGGTGGAAATGTCTCAAAT
TCAAAAACAATATTACAAATTGATTCTTACGAAAAACGTTCAAGAGTTGTGTAGAGAGTT
GAAAGGAAGTTTTAGTGGTCTGTTGAACATTATTGTCGAGTTGAAAAAATGTTGTAATCA
TAGTTGTCTGATAAAACCGCATGAAGATGCATTTGAAGATCCGAAATATTTACAAGTGTT
GATCAATGGCAGTGGTAAAATGATCTTACTTGATAAACTTCTTTGGTCGGCTCAAAGAGA
CTGGTCACCGCGTACTGATCTTCTCACAGATGGTTCGTTTACTCGATATCATCGCAGATT
ATCTTTATCTGAAGAAGTTTCAATTCCAGAGACTTGATGGGTCTATTAAAGGTGAAACGA
GGACTCGTGCTCTTGATCATTTTAATGCAGAAAATTCACAGGACTTCTGCTTCTTGTTAT
CAACGAGAGCTGGTGGTTTGGGGATCAATCTTGCTACTGCAGATACTGTTATTATATTCG
ATTCTGACTGGAATCCACAAAATGATCTTCAAGCTATGGCTCGCGCTCACAGAA
>cap3_Contig498
GGTAATCCAGGTGCTATAGGCCCAGTTGGAGCTACAGGAGCACAAGTAAGTACATCCATC
GTTTGTTAATTTTACAGTTTGATTGTTTAAAAGTAGACGAATCTGTTTGATTTCAACTAA
AAATAAAGTTTGACGTATTAAATGAAAATAATGATTATATCTCTAAGCGAATTATAATCA
TTACATTGATGATAGTACAGTTTTCGAACAACAATAAAACTGGCGGCTTTGCCTTGCTAA
AATTAAAAATATTATTAGTCGTTTTCAGAAATGGTTTCTCTGGTATATCAACCCACTGTA
ATTTACGCATTGAGACACTCCTATAGTATACCTTGTAATGTCAATGTGATACATTGTGAT
AAAGTATGATACATTGTGATTCAGTGTGATGAAGTGTGTTACATTGTGATACAGTGTGAT
ATAGTGTGATGCAGTGTGATGTAGTGTGATACAGTGTGATACAGTGTGATGTAGTGTGAT
GCAGTATG
>cap3_Contig499
GCTGTTATTGCCGTGCCGCAATAATGGATCAAAAATCGATCCTCTCGTTCAATGAAATCA
ATTTTCAATTTTTCTAGAAAATCTTTTCCATCAACAAGTGCTTTATCTTTGTTAGGCGAA
GGAACGTTTAATATATTCAGTAATGTTGGATAAAGATCGAGTCCACTAACTGGTCTTTTG
TAAAAGGTATTAGGCTGAATAACTCCAGGCCACATGGCTAAAGTTGGCACCCTTATACCT
CCTTCCCAATTACTGCCTTTGCCTCCTTTGAATATACCTGAATACCCACCATGCATTTCG
CCGTGTACCTTAAAGTAATTTGCTGGTCCGTGGTCAGACGTGAAATAAACAAATGTATTG
TCATAGATATCGTTTTGCTTCAATGCCTTAATAATTTCCCCGACTGACCAATCAACTTCG
AGCATACTATCTCCATATAATCCATGGTTGCTTTTACCTCGAAATTCATCAGCAACAGAT
AAAGCAACGTGTACTTTGTGATACGAAATGACACTCAGAAACGGTGCGTCCTTTGACTTT
TCTATATACTGAACAGCTTCCTTGGTCAAACGCTGTGTCAAAGTCGGTAAATAT
>cap3_Contig500
TTTTACTGAAATAGAAGTACTTTGATATATAAAGTCTATAGACTATGAACAGTAGTTTTT
CTCTTTTTAAAGTCTTTCACCATATTTATAGCTATGTACAGTACAGACAGAGAGCCCTTA
AAAAGTATGTTTTCAAGGAATTATCTTCCTCTCCCACGGCCCCGCCCCCTTCCACGAAAC
ACTGGTTGGCGTTGTCGTCCTTCCGTAACATTTGCATGTTGAGCGTCGACATTATCAGGG
TGGTTAGCACGGTTATGCTCATATTCATAATTGAAATGTCCACCTCCTCTTCTTGATGGG
TTCTCGCTTTGTTGTCGGCCCTGTACATTCTCTGGATGATATTGTCTCGTTTTTTGTTGT
CGATTGTACGACCTTTCATCGGAATTCGATGGATGATCGTGGCATCTGTTGTCGTCCCGA
ACACGGCCCCTAGAACTAGATCTAGGTCCACCGAAATAACCCGTTTCACGAGCATCAGCA
GGATTGTGGCGACCTCGAGTCGGTTGAGGTTGGAAACTCGGATCTCGTCGGTTTTCGTCA
GTGGGGANCGGAACGCGTATCATAGTATGGATTGTAATGGTTGTATTCACGTTCAGAAAT
GTATTGTGGGCC
>cap3_Contig501
GACCAACTCATTTCCAGCTTTGAATAAACCTAATTTCTCTTTTTAATTTCAGATTGTCAC
ATCGAAAATGCGTAAAAACGAAGGACTGGTGATATGCGGGGTGTAGTGGTCATCCTACTC
ATTCTTCTCATTATCGCGTTCGTCATCGCCTACTATTGTAAATGGCCGCGCCTTATGACG
CAAGTGAAAATACAAAAAGACAATGTCGCGCGTAAACTCGTCAAAATGAACAATAACGAA
CGGATGAAGAACCCGGACGAAGAACCGTTATCCCGATTATTTTAGTGTTTTTATTGACAT
GATGTTGGTATGAAAGATAAATTGATTGGTTGGTTGCAATCCAAAGACTTTGATCCTACG
AACCGTTCACAAGGAACCTTTGTCACTTTCCAAAGAATATCTTAAAATGAATGAGGAACC
TTTCTTGTCCGAGGAAAATCAAAATTATCTTTTATTGATACAGCAACTGTATAGTTAAAA
ATAATGCGTCAGTTTGTATGGATACCATTTCGTTCG
>cap3_Contig502
AAAAAATACATGTTTCAGACAATTTTTTGGTAAATTTGTCAAAATAATTAAGAAAATAAA
AAATAACAAGAAAATAATAGCAGAAAGTCAAATCACAAATTTAAGCTATCCCTACTAGAC
GAGTACAAAAATCCTGGTGCATTAAAACCTTGAGAAGCTCTATTATTTCCACTTGTATTC
AATAATCCTATTTTTTGCTTGTTTTTCTTTGTTCCATCATCTGTTCACGTAATTCTCGAA
GCTGTTTCGACAATACATTTACAAGTTCATTTGTTGCTCCAAGTTGAGTTTGTAAATTGC
GAATTTCATTTTGTTCGGTTTCACCTTCATCCATTGTTAATGACATACAACGTAAATGAG
GAAACCAATCTAAATTTCTCGCTTTTATCATCTCAGAAACATAACTCTCTGGTCCAGTGA
ATTCGGTTGGATCTTTAACCTTGATCAGAACAATGAAGTAAAGATAATCCCACATATTGT
GTTCATTGTTTATGTGATGATCAAACGTCACTGAACGATTATCAAATGATGCTCTCTCAA
GCCCACAAATAAAACAGCTATTTCTTAATATTTCTTCCTTTGTTTGATTTTCAGTCCTGA
GATCAGCAAATGTATCAATGATGACACCAAAAATCAAATTAAGAACAATAATGATAACGA
TGAAGAAGAAAAGCAAATCATATAAAACACGAGCCATAAAAAACCTATCTGATTTCGATG
GTACTCTAAGTACATCTCCAATACCACCACCACTTCGCAAGCCTTTATTCAAAGTTGTTA
TGATACACATTATTAGGTTTTCGCATGCCTTTTCCTTAATAGTTGGTGAATTGTCTTCTC
CGCCTAATG
>cap3_Contig503
TGGTATTATAAATTTGGGACAACTGTACATGTTATAAAGCGCGTAGAGAGAGTATATGAA
GAATAAATTTCTTAGCTCTATTAATAAAAACACATAACAGCGCTCATGTATTCGGATCGA
TGAGGGGTTCTTTTTCTAGAGGTATTCTGTATTTCTTGCGCATCTTCTCTTTTGCTAGTT
CGTCATCACTCGATTCATCTTCAGGGTTGACGAAATAAACCTTTTTGTCCTTTCTGTAAT
CAAATATACCTGGTTTCTCGAATAACGGCACGCGCAGAACTTTCTGTCTGTAATGACAAT
ACTTAAGACAGAAATAAAATGTGACCATTCCCAGGAGGATAATAATAAGCGGAAGAACGA
CTATGATGACTGCTAGTTGTACATCGCATTGTTTCACGTACCAATCTCCCCCACACGAAT
TAGGGACGTAACCGAAGAAGGGGTATGTGTGACATCTCTGTGACACATCACACCAGTAAC
ACTTGTCATCTTGTACGCACTC
>cap3_Contig504
GTTTAGACGACAGCATGGGTACCAAACAAATCAACAGCGACAGTTTCCCAGCATTTAGAT
GGAACCCTATGAGGTTTTATTGGTGCAGAAGTTTTCTTCGTCGAGAATGAGGGACAAGCA
TTTTTCTAGGCATTCTTCTACTTTGGCTTTCATGTTGTGAAATAAGAAATGTGAGCGTAA
CCTTCTCTCCATCGCCGCTTGTCTTTGGTGACTTCCCCTGTGTGCTAATTGTATAGCTTC
ATTTTGAAGACTTCTAGGTAAAATGATTCTACTGCCTTTCAGAAGCAACCCTGAAGGTGT
TTCGATCAGTTCTGGTATGATATCCTTGAACCGTTGTAGATCTGCAGGTGCATTCTTCAG
TATCCAAAGCTGTCCTTTGCGAAGCAATTTGGAGATTTGTTTCAACACCTCATCTTTCTT
GGTGTGCTCAGCAATAACTTTCAAATCCAG
>cap3_Contig505
GCAACTTTGAACCTAAAGTTGAAAATACAATTACAGTTGTTAAGAAGGAGGAAGCATCTA
TAAATGTTTCTGAAATCCTAAAGAATTCTTTTCTATCTCGTGGCAAATTAAAAGAAGTTG
TGAATGACACTTCTGTTGTTTGTGTTGGAAATGTTGATCCAAAGTCTTGGAAGATTACTG
TGAATAAATCTCAACAAGGCAATACATTGGATTCTTTAAGGAGTGTTGGTCATGAACACA
ATAATAAAATACAGATAACATCAGATAAAATCGTCTCTTCTATTACCAACAGGCCTGAGA
CTGTTGATATATTTTGGGAAAATCCTGTTATAGGTCTTGGCAATAAAACTGGGATCCCAT
CTCTTTTGTCGAAAGAAAACAAGACATGGGATCCCAGTTTTATTGCCAAGACCTATAACA
GGGATCCCATCTCTTTTGTCGAAAGAAAACAAGACATTGAAAATTTTGATAAAGTTTATA
GTTCTTGTACGTTTACTAAGAGATATGTTAAAAACGGTTCGTGTTATAGGGCCTGTTGAT
AATAAGTTTATAGCATGTACAATTATGTCTGAAAGTTTCAATCGTGGATGCTTGTGCTCA
TCGATCAACATGCAGCTCATGAACG
>cap3_Contig506
GAGACAGATGGTTTTGTTTCCTTTAAATGTGGCTCAAAATCCTTGATAACACTGGTGGCG
GCACTTGCAGGAAGGTTCGTCTTTTTGCAGGATTCTGATTACTTATCCCGCAGTATTATT
ATCTTGCTTTCGCAGGAAACTACCTTCTTTGTGCTCGCAGAAAGGAAATAATATTTTCGG
ACACATTGCGTTCCGGACACCTCTCTATATGATTCGATACTGCATCACGTGTTCCATTCG
TATATTGTGCTTCAATATTTCTTGCATCTCCAGCCTCTCTTGAACGTCTTTCTCACACCA
TCCGACCTTTCNCTGCTTCTTACCGGGCTCCTACAATAGTGTTGA
>cap3_Contig507
TTCTCCGTCATTAAACAAAACACAATCATAATAAGGACCTTTATCTTTGATTTGCTTATC
AAAATTCTTCAAAGCTTCTACGCAGGATGATAGATTTTCATGTTCCAATTTCTCAGTCTC
AGTAGATGGCGAAGGATGTTTAACATCAAATTCTGCTAAATTATTGACAGCTTGAGCAAG
TTTGATCTTATGACCAACATCCCACTCTTCTTCCTTCTTCTCTTTCTTTACCCTTCTGCA
TGCACCTCCAGGGTACAACAAATAGGCGCTCTTTACACCAACTCTGTATTGGCCAGATGG
ATTGTTCCATGTTGATGGAATTGTCAACTTCCTGCCACTCTTTCCAGTAATCGTTCCATC
CTCTGCAACAGTTTCAATTGTGGATGTATCAACATCTCCACAACCTGTGCAATCGATCAA
ATCTGTAATTTTTCGATCTCCAGATGGTAACAACTGCAAACCAGGGGCACCAGGGTCAAC
TCCAGTATCGAAGATAGCAATCAAGACATCTTTCCCATTATAATCTGGGTATTTGCGCTA
GAAAGCCTTCAACTTGTGTCTCCTTTTTGGAAGTTAATCCATGAGAAGGAAAATCTTCTA
AAGCTTGTCCAGTGGTCGCCATTTGTAAGTTATGGTGTTATCAAT
>cap3_Contig508
GTTTTACTCGAATTATTAACATTTATTTCAATTATCTTGTATCGTTGGATTCATATCCAC
TTTTTCAAGAAATCCGATTCATATCTGCTTTCGTTATGGATCGAGAACTTTATCACATTT
TGTTTTGCTAAGTTCCTGTTTAAAATGTTTAATTTGCCACGATTCACGTTTATAAAAAAT
GTATCCAGTTTATCACCACTGCTACTCCTAAACGGTGTTATTATCTTGATACATGGCTAC
GATTTTGTTGTCTTTACACGTAAATCTGGTGGTTCGGAATTCTTCCAATTCAGCATAGTT
CTGTATTTACCGCTCCTACTGACTGTAATGCGAGCAATTTGTACATTTCAAATACCACCT
TATTTCTATAATATAATTACTTTGTTTACAATTTTGAAAATTACCTTCTTATTTCAAGAT
CCTGAATTTTCGTTATCATTTTCACTTTGTCTTGGAAGTATTATATATGCAACAACTTAT
GCACTTTTACACTTGTTAAGTTTAAAAGCAGATTTGCAGAAATTTACTGCGTTAGAAATC
ATTTATGCTACTTT
>cap3_Contig509
GGGGAGGCTGAAAAACTTTTTATTCGTTGCCTTGTTTTTATCCTACAGATATTCTAAATT
TCCAAATTTGTTCAAGGAATATTTGGCCACCCTGGTAAAATTCAACTTTTAAAACTCTCT
CTCACTCACTTAAATAAAAATTCAAAACTAAAATGAATATCAAACACACACTGTATCAAA
TTTAGATCTAGTATATGAAACCAGGGAGCGAGTGTAAGTCCTCACAGTATGATAATTAAA
CGCAAATATACAAAAACAGAAAAATCGTCTTTAAAAAAGGTAAACAGTCAAACTGGGTCC
GGCCAGTATACTAAAATAAAAACCTAAATTATTCTCGAATCAATCAAGGTTTGTTTATAT
ATATGTATTTTTTTAATTCGAGTACGTGTGGCCACACCGTAATCTGTTTAGTATTGTTGC
GGAGGCAAATCTTGTGATCGCGGTAAGCTTATAGCGTAATTCTGGAGTATTTCTTGACTT
TTCGTGTACGCATTTGCAATATTAAATACTATAACCTTGTCTTTATCTAATTCGAAATGT
ATAAATTGGAACAGTCTAACAATAGGGGGTCATCGCCCGCCCGTAGTACAAGTTTTGTGT
CTGATTGGTGAATTCAGAGTATAACCGATCTTCTTGATGCAACACGTGAGGCATGT
>cap3_Contig510
GTTTTGCCTGACACTTCAAGTCTATTTGGTAGCTCGGTATCCTCTTTTTTTTGATAACGC
AGAACCTGTTACCATTGCCAACAGAACTTCCGCGGTACTTTTGGGGTTCCTACCTCGATC
GACCCGAATACTCCCAACGCTGAGTAAAAATCTCGCCCGGGGATATCATGGTTTGACCCA
AAGTCAGCATCAACGATGGTGATCAATAGGTCATCCCTTGTTCTCACCCGGTGCTGCGAT
GGGAGATTCAGGGGGATCTCGATAACCTCAGACCCCTCAGTACCCCTTCTTTTTCTGCTG
AGCTTGATAACAGGCTCAGGAGGAGTACTTTGTGTGTAAATTGTAAAAATTCCCATAAAA
CGTCCTAGTCCTTCTTTTATTACGATGGAACCGTCATCAGGATATGATGCTTTCACCGCA
TTCAGAATTTCATTTAAATCGGGTTTTCTGAATGATACCAAAAAATGGCGATATCAAATT
GTAA
>cap3_Contig511
AATTGGTAATTAACTATTTAACATCACTACTAATCAGGGTAAAAAATAAATTATACCATG
TTTAACGCAATAATGAGTCTCTATTTAAAACAGTCCCCCAGTTCTGAAAGGGTTGGGGGA
AAACATCCAGGTACCACATTAGTTACCAAAAAAGTCCAAAAAACGATATATTCGTGTAAC
CATCTAATAGATTTTGCGCGCATGCATGATACATATATAGATCCCGTGAATATGAAATAA
TTATGCAGGCAGTTGGCGGTGAAGTGAACCTTCTTCTATCAAGGTGTAACTCATATATAC
TTAAATAGACTGATCTACTTCGAATTTAATCAAGATATTTAAATAACTATGTATGTACCA
ATAAATGGCTGTATTCCAAAACAGAAACCAGCCCTACTAATCACTATTTTCATCAAATAC
TCCCAATAACACCCAGAATACTCTAGACAAACATCAGAAGACGAGTAACTATTTCATATT
CATGAACGGTGTAAATGTAA
>cap3_Contig512
GTTTAATTGATTTTCAAACGACGCTTCTTTGTTTTCGTTATCCTTCTTCTCTTTTTCGTT
CACAAAAACAAATCCATCAGGATTAGTACCCTCAGATGAGTCCTTTGAACCATTATCTTT
ATCAGAAGTATTTGGAGAATAAAGATTACTACCAATATTCTGCATAATTGATTCAAACAT
CTGCCCCAAGTTTTTCATCTGCTCATCTGGAATCGAATTGCCTCCAAATTGATTCAAAAA
GGGGAAGGATGACTGTACAGGTATATCTTTAGATGAAGAAGGGATAGCTCCATCCTGATT
TGGTACATCCTTATTTTTATTTGTTGCATCTTTCATTTCAACATCATCTGTTTTTTTACT
TCTTTATCAACAATATGATCTTTGATAATTACTGGATAGGTGTCTTGTTTCATATTATTT
ACCTTTGCTTTCATGACTTTCTGCATCAGCACTTTTGTTATCAGAAACACCTTCAACAGT
TATTTTCCATTCTTTTCACTTCCACTGTGA
>cap3_Contig513
TGACTCCCAACAACAAATTCCATAAGTTCTTGAGGGTGAAAAAGATTAAGTACAATCCCA
CCACAAACTCTGTGAAACCCAAGAGAAAATGCTTGGAATTCTTTCTCTACAGATGAATTC
AACTTATAATCAATATATGCATTAACATATTCTTCTTTATTTTCTTGTGTAACTTCAATG
GTACTCCCATTATGAATTAAATCGACTGTCCTCGTCTCACCAAAAGAATGTTCTATTAGT
TGAAAATACAAAGAAAAAAACTTCACTTAAATCATCCTCAGTATAATCCAGTAGGTCTTG
TAAGCCTCTTGCAACAGTGGGTTGTAATCCACGGAGGTCGTCTAAATTAAGTTTTTTGTT
TAAAAGCTTTTTATTATAAGCAAACAGGAAATGGAAAATCAATGATAGTAGAGTTGTAGA
TAGCTAAGCCACATATAACACCAATGAGCATGAACATGTTAGAGTCCTCAAAAGATTGAC
ATTTGAACCAAATAACATTAGTGTCTTCATAAAATTCAAACATACCATACTTAGGGTCAA
GTATTTCCCTCATTAGTAAAAGAAAAAATTCTTTTCTCACACCCCCTGCATCCTCTGCAT
CCTCTTGGCTAAATTTTACTTTTAAAGGCTTTTCATCTCATGAGGAGGGTACAATGATAT
CTCACTTAG
>cap3_Contig514
GGACAGTCCCTGCCATCTGTCACTTCATTGGATGTCGGCACTTCTTCAGCTGCTGGCAAT
TAATCTGCAGGGGGTGGAACTTTGTAGAGTTTTAGTCCCTCGGGTGTAATTTTTTCATCC
TCACTTCCATCTGCTGTTTTTTCCCAGCACCTCCTAAAATTATCATAATCCGGAGAGCAT
AATTTCTTCCAGGCATCTCCAACCCAATGTGTGATGAGAATTCGTCTTTCAGATGCGGTA
AACTGTGAATCATTTCCATACCACTAGTCTGTATTACCTTCCTTATCAAGCCATTCCTGG
TGCGCTTGGCCAATAAGAACTATACCTGCGTCAACAACTTGCCACAAGTCAGTAGCATTT
TTTAATCCATACCATGCTACTCTGTTAAGCTCGGAAACGGAAGATTTGAATTGTTCTGAT
TCTTGACTGTTCAAATTGTCCAAGAATAAGACAAGGCGGCTAAGTCCCTGAACTGATTTT
GAAAGTAGTTCCTTTAATCCATTCCACGGATACCTCT
>cap3_Contig515
AACACAATGGAAAATAGGGGACGAAAATAGAAATGGTAAAGATCGAATTTAAACATTGGA
TGGTCGAGAAGATGTTAAAATGATGGCACGACTCCGTATTCATTTAGATGAAGGAATAGT
ACACGTCAACGGGCAGCCTATCGAACATAACATTGTCAACTCCATTCACATGTCAGTTTC
AATTATTAAAACTGAAGACGATATTGAGATTGATGAGCGATTGGCACCAGTAATGTTCAG
AATCTTAGCACGCGAAGTCCCATCGGACAATGGAGGTATGAAACTGATCACAGAAGTGGA
ATTCTTAAAAGTTGATCAATACGATGTGGAACAGGTCGATATCAAACAAATCATCTGGGA
TGGTGCCAACCGTTTACCGGTGATTTCGATTTCACGGGAGGAGAGTTACATCCGTCAGTC
ACCGCTTGAGACTGATCGACATGTTTATGTTGATGAAGAGGAAAAGAAACGACAAGGGCA
CCACGGAAAGCACGGAAAGCACGGAAAGCACGGGAAGCACGATAAACATGGACATCATTC
GTGTTGGTTTCATCGATTAAGTCGTAGAAAGAAAAATCAATTGTGATTGTTACAGCTGCC
CTTTGCTTGATCGCTTTGTTCGTGTTGACAATCGTTTGCTGGAGAAGACGTCGAGCAAAA
TCGAAAAAATAGTTAGATGTCGATGCTCCAACCACCGAAGTTGAAGTTCAGACAGAGAAG
AAAAG
>cap3_Contig516
GTTTATGCAATTATTTTCCATATTCAATGCTCTACCAAAAAGCAAGTGATTTGGAGTTAG
TATTTCATCGTTTACTCCACATAAAGGTCGATTATTAAGTATAGTTTCGATTTCATACAC
AACTGTTTCTAATTCTGCAAATTCAAGCAGAACTTTTCCAACTGACTTTTTAAGACACCT
TTTAACACAACCAACTAGACGTTCATAATGTCCTCCCCACCACGGAGCTTGGACAGGATT
AAATTCCCATTGAATACAATTTTTGGCAACAAACTGTTGTGTTAAGTCTGATATGAAAGA
GGAGCCATTGTCTGGAACAATTAAACTAGGGCATCCTCGTCGAGCAATAAATTTACGAAG
AGATAAGATAAAGTCTTCTGCACTCATTGAACAAACAAGGTCTAAGATTATTCCTCTCGT
AGAGGAACACGTATAGATAATTATATAAACTTTCAACTGTATGTCATCTTCGTCGTTCGA
ATCATTAACATACAAAGGACCAAGGTAATCACAACCTATGTTGTGAAAGCTTTAGTATCA
TTGAATCGTGATATTGGCTATATCTGAAAGATTGGGATAAGTGTATGGGCGTGTGTTGAG
TTTTTTGCAAGGTATGCATTTACTTATCACCTTTTTCACGAAACTTTTTCC
>cap3_Contig517
CGACCAATAAGATATGCATGTTCTTGAGAATGCTCAAACAAACGAAAAATCTGTACAAAG
TTTTTCTCCTAAATAAATTTCATCAAAAAAATATCTCCCTAAACAACGAGAGGCATAATA
TTTTTTAAAGAATAATTTCTTTTTCATTTTAAAAAAGGTTTTCTACGATGACTTATTATT
ACTAGTGTTCAGAAAATCATCATTTCGGATTGTTCTTTTTCTTCTCTTCAATCCATTCGA
GAATTTTCGTTCTTAACTCGGATACCGGTTTCAACATGTCCTCTGTGAGTTTTTGCTACT
AAAGGGATCCGTGTTAGAGTTCAACAAGTGACGTAAAATCACAGATCTGTCCATTATATT
CCCACTGGGGAGTTCAACTGGATCCATCATAATAGTATTCATAAGAGGATCTTTATATTC
TTCAGGTGCATCGTCTAAATCCATGGCGCTTTCGTTGTTCTTGATGTAAATCTCTTCGAC
CATGTCTGCAAAGCTTCTCAGCTGGTTCAATTGCGATTCCGTTTTCAACTAAGAAACGTT
GGAGTAGAGC
>cap3_Contig518
TACTACCATGGGCCCACTTCTTGATACAACTAGTAATGAAGATCATACCAAAATGTTCCA
ATGCAACTGTTAGCAACAAGTTAGGCTTATCATCACTTTGTCTGGCACTGTATGGTAACA
GACCTGCCACACAACAAGAATCGATTAGATTATCAACATCTAGAAACGCATCTGTACCCA
TCTTCGTCATGTCGGCAATTATCTTCTTTTGCATACCAAGCATTTCTACTTCAATCGTGC
CCACCTCAGAGAGACACGTTAATTTAAAAGATAATGATGATGGCCAAGAGAATTTGTCAA
CTTGTGGCGCGACATTTGTATGAAACCACTGCAGTGTTTTCGTATCCAGGTAAACATCTA
ATATTCCACCAGGAAGGAAGTCCTCAGCGACATCGGTTAACGAGTAGAAAGCAAAGAATG
AGCACACTGGTTCCATTTTGCCATACATAGCATCCCTGATACAT
>cap3_Contig519
GTTTCGTTGTCTTTAACAAGACCTGACACTGAAATTGGAGTCTGTAGCGATTGATTAGGA
AGAAGTGGCTTGTTGGGAGTAGCTAGAGCAGGTGAGTTAATAGCTCTCTGTAAAAGAGCA
TGCTGTGCGGGCTGCTGAGGAACTTGTTTTGGTAGTTGCTGTTGCAAAGGTGTTCCGAAT
CGAGGGTTGCTCTCGTTGGCTAACGAAACAACTTGAGGTCTGACTGGTTGAGGTGGTTGC
TGTTGCTGAGCAACAGGCTGAAATAAGGTTTTGGATGGATCTGAGGCATTTTCAAGAGGA
CGAGCAACAGGTGTAAAAGAAAACTTGCTTTGCCCTGTTGGTGCTGAAACAGCTGGTGGT
TTCGCTGCAACTGGTGTTTCAACATTTACAGATTTGCATGCAGGTTTTGGACTGGGTTCA
ACAGCAGCAGGAGGTGGAGACTATGACAATAAAAGAACTAATGACCACCAGACCAAATAA
CTCCTCAATCACGTAATCAAG
>cap3_Contig520
AATAATTTAAGCATTTCAAATGCTTTGACTTTTCGAAAGTTGTTACAACCTTTATTAATG
TACTGTGGTATTTCAATAGCCAAGTTCCATCCAAGAGAAGGAAAACGTTGGATTAACTCT
GTAAATATCACTGGTTGAAGATGACTTGATTTCTTTGACATGAATTCAGTAAGAGCAGCC
TTAAATGATTCCATTAAACGTTCCTCATTTAAGCAACCACCACCAGCTTTTTTCACAACT
TTCTGCTTTCGCTGAGCTCTTGTGGCACGAGGGGACGGCCCCTTGATTTCTGGATTACCA
CGTAAAACTCTTATCAGGTAAATAATACCCTGAGTTATATATGCAACTAAAAGTGCAGAT
GTAGCTACTTTTGCCAATTTGATAAGATGATCAATCTGATCATGAACAATATTGACATTA
AGATCACTTCCAGATGGATATTCATGTAACATACA
>cap3_Contig521
AATAAGTCAGAAAAATACAATTGTTGCTGAGCAGTGAAATTATACAGTATATCCCTATAT
TAGAATGATATAATATCAACCTCGTACCCGGGACTCTTTTCTTTTTAAATTGGTATATGG
TTAACAGAATAAAATAGGTTAGTTCATTTCTTCTCCCGTTGTTTTCGGCATTTTATTAAT
TTTCTTATTCAAAAAGCGCAAAAGAACGCCAAGAAGAAACACCACGAGAATAGCCGCACC
AAACCCAATTATAATCGGTAAAAAGAACCCACTGGCTTGGGAAAAGACAACAATCTTTGG
ATTCTCAGTCGAATTCGTACCGATTTCGTTCAGACCTATCTCACGACAGGTATCAATATA
AAACCAATTGTACTCTATGTACTTTCGTAAATAATCATACTCGTCTTTACTGCGAAAAAG
CGCACCAAACGAATATTTCTCACTGAGATATTTCGTACTGCGTATTGTCTTTTTCAATCT
ATGACAATTCCGCATCCGCCTGCAATAGACCATATACGCGTACTTATCGAGCAGGAATCC
ATCGATCGAATTGTCCT
>cap3_Contig522
CTTGCTTGAAACGGTAGATGGCAGCGACTGCTTTCTTCCCTTGGTTCGATTTGATACGGA
TTTCATCTGCAACATCATCTTGTTTGAAGTAGACGATTGATTGATATTCAGCTGTTCCCA
ACAAACTCAAAATACCAGTTCGATACAGTGGTAGCGCCTTAGGTACTTGCAAGGTTTGGA
CCCACAATGCATTTACTGAATCGAAAACATCAATTCCTCTGTCTGTATAAACCAGGAGAT
ATGGCTTGTTGCAAGCGATATGAGTGACTGGAGATGGCCATGCTACTTCAGATGGTCTTG
ATCTCATTCCAAGAATGTTCACATAAATACCCAAGCTCTGAAACATAAGAGATATTCTTC
ATCAGCCACTTTGACCGCACACAAGGCTTCTGTGTTCATGTTGACCATGAACTTCAACGT
ATTGGTCATCAGGTACTTATTAATTTTGGTAATTTGAGTCTATTTTCTTTCA
>cap3_Contig523
GCGTCAACTACACTTGTCTTGAAGTAGCAAACCCTTGTATACCGGGTAACGTGAGCGTTC
AGATCGAAGTCAACATGCCAGTTTGTCAAGCATGTCCAGAGGGATACATTTCTCATCAAC
GAGACGATCAATGTTGTCCAGAATGTGTTCCGACCGGTGCTATCCCTGAGGTATGCAAAA
TCGTCCACTACGGCAAAGAAACATTAGAATACGATTCGGCCGATCACGGCTTATGTTTAT
CCGACAAACGATACTCGGTGACGGGATGCGGAGGTATATGTCGAAGTTCATCAAAAGCAA
GACTCGGAAGCGAACTTTACTCGCCGGAATGCCGATGCTGTCAAGCAATCAACGCGCATG
CGTACAACGTTAGCTTGACATGTCCAGGCGGACATAAATTATACACGACTTTCCACGAAA
TCATCGCGTGCTCCTGCGAGACGACAACGTGCCAATCGACGTACAACATGAATCAAGTCG
ACGTTATTCGAAGCGATCGCT
>cap3_Contig524
GTCACGACTTGCAGGAGCTGCGTGGTGAAACTGGGAGTCAATATCATGCACAGGTCTTCG
CAAAATGTTCAGAAGTGATGAATATCGTTCAGGATATTCACGTCCCAGTTATAGCAGAAG
TCAATGGCGTTGCTACAGCTGCCGGTTGTCAATTGGTCGCTACTTGCGATTTAGCTGTTG
CCTCTGAGAAATCCGTCTTCGCTGCACCTGGTGTCCATATTGGTTTGTTTTGTTCGACCC
CTGGTGTTGCCATAGCACGAAGTGTGAATCGTAAACAAGCCATGAAGATGCTGTTAACGG
GTGACCCGATATCTGCACAAGAAGCTCATTCTTGTGGGTTGATCAATGAGGTGGTTCCTG
CAGATGAAGTAACACAAGCTAGTGAGCGTCTCGCTGCAAAGATCACACGTCACAGTCGGC
CAATCATTGGGCTCGGTAAAGAAACCTTCTACAAACAGATCAAAGAGAATCGAAACGACG
CCTATTGCATGGCTGAGGATGTGATGGTGGAGAATTTGCAGCATGGGGATACCCAAGAGG
GAATCACCGCCTTCTTCGAGAAACGCAAGCCCAAGTGGCAGTGAAGGAATGACCACTTCT
AGTTTTTTAACCTGTAACAATATGGTATCTACGAAAATGAATAAAAACTATTATATTTTT
GACATAACC
>cap3_Contig525
TAGAAAGTATTAAAAAAACATGAAGAAAATATAAAAGATAAACATTAAATGATATAAAAA
CTGCCTGTGTCATTGTTCCATCTTCGAATAAATATTATTCCTTCGACACAACACATCAAA
AGTTTCAAAATCGATCCTCCCATCCTTCACATCTGCTTCGTTTAGCATTTCCTGCAGATC
GAGAGTTGATACTAAATCTCCACATTTCTTGAACAACATTTTCATGTCATCCACATCAAG
ATACCCTTTCTTATCAACATCGATCGAATTAAACAAGAACTTAATTTCTTCTTCTGTAGT
ACCTGCCTTGATTTCATCATACATGGCTGAATGAAAGTCTGAAAAGTTGATAATCCCATT
ACCGTGTTTATCTAGTTCTTGAACAATAATTTGACAATCTCTTTCGTCCATTTCCATTCC
CATCGAGGCGTATGCAGACACTAGATCGTATGTGCTGAGGTATTCAACACCTTTGATATC
AAGTAGATCAAACATATCAAC
>cap3_Contig526
GGAATTATGTTAAAAAAACAAACTAGAATTAGTGCTAAAACCTTTGAAATGTACTATAAT
ATGCATCGATATCAATATGTTGCAGTCGTTTGGATTCGAAAGGAGGACCATGGATTTACT
AGTTCACCAGTGCACAACTTTTTGATAGTCTTGATAACGTCAGGATGGATATCGTTGAAA
CAACTCACGATCATCTTGCAGTAAGAAGGTATTATCACTTTTCGATCAGCAGTGATTGAT
TTGTGATTAGAGTGTACAGAATATCCACATTTCCTTGTAAAATCATTCTTTAATTTTGTT
AAGATTTGATCAGCAGGAAACTTAGCAAAGACAACTACAGTTACCGAAAGTGTACTTTGA
AGAAGGTAGACGGACATTCGGAGTGATGCAAATACGACATAATACAACAAACAAGTTGGA
AGTAAGAACAGTAGAATAGTAGAACAAAATCGTTACCAAGAATAAGTTGATCTGCTTCGT
ATGTCACTGAATCGACCCGTAGACGAAGAACATTCCACTTTCG
>cap3_Contig527
CAACCCTTCACCTATGTGGGGTGGGGCAACCTGTGCTAATTTAGGAGTTTCTACAGAAAC
AACCTTGTGCTGGACATGCCCTACTGAAACTTGGATGCAAGCTGCACGTGCTATGATGGC
AATGGCGACAGTAGGCGCGTTCTTAGCCTTGTTCTGGTCTGTACTTCTCAACTGTGACAA
TCGATCACGGCACCCACTGTGCACTGGTGGAGCACTCTTCCTCTTAGCATTTTGTTCGGG
AATAGCCGGTCTCATCATTTACCACTCGAACGTCGGTACTGTCGGCGGTTGCGAACTATC
ATCCGGATGGAGTATGGTATTAGCTTGGCTCGGTGTTATTCTCGCCGGAATCGCATACAT
CATCGCCATGGTAGCCATGTGCCATCAATCGAAGGAGACCAGAGTTAGTTCTGCGGATAA
CATGCAAATGCGAGCTGCTCATTCTAAGTAATCTTCTCGCTCGCGGGCTTTTCTTCAAAA
GAAAAAACACGTGTTAGAATATCCCGGCAATTGTTTTACGATGAATATACCGATGATGTA
TATATAAAGTCGTTTGCCGATAAATTATCTATTTAAAA
>cap3_Contig528
GCATCCCAGAAGGTCAGAAAGTCAGACGACTTTCATCTAGCTGTTTAATTTGCTTTGATG
CAAGCTATAGAATGGCGATTTTAGAATAGATTAGTCACTTTCACTCCTTTACTTCTGTAT
GATATTGAAATGATTCCAATTTCACAGAATAAATGATACTGTACAATGTTTTTTTAAAGT
AGATAATATTATTTGGCTTAATATAAATGATGCATGATTTGGGCCCACAACGGTAACTTC
CCATTGTGTCTGATAAAAGTTGTCCAATCACACCCGTCACATGATTCTAAAAAGATGTTG
ACTAAGGGGAGGTTGTTGTAACAGAAATATTTGTCCTATTACACCTAACTTTTTAAATTC
CCATTAAGAACACTAAAATACTTTCTTTGTTTGTAGTACAGTTTTGACTGTTATTTTCGT
CTTTTTATCTTATAACTATTTTGTGGTCTTAAAGTCTGTGTAATTGAAATTGG
>cap3_Contig529
GTCATTTAACTACTCTCAAAAATGTTGTATCTATTGAATCGTCCCTAACGACTTTCCGAC
TTCAATGAACGCGTCGGCACACCTGTTGACGTCATCGGTGGAATGGTCGGCCGATAACTG
AACTCGAATACGTGCTTTGCCTCGGGGAACAACCGGGAAGGTGAACCCGATGACGTAAAT
GTTTCGACTCAACATCTGGTCTGCAAATTCAACTGCAGTTCTCTCATCGGGCATCATGAC
TGGACAAATTGGATGATTATCACCGATGACATTAAACCCTGCTTGCGTCATTCTTCTTCG
AAACAAAACAGTATTTTCGTGGACTTTCATTGGCAGATCGGTGCCTTGCAATAACATGTC
GAAAACCTTATCAGCTGCACCAACAACTGGGGGTGGAATTGAATTGGAGAAAAGATAAGG
ACGTGCCTTCTGTCTCAACAAGGTGACAAGCTCTTTAGGTCCTGTTGTATACCCACCAGC
TGCACCACCTAAAGCTTTACCAAGTGTCGAGTTGATGATATCAATGCGACCAGAAATATC
AAGAAATTCTTACTGTACCTCTTCCAGTCTTTCCAAAGAACCCTGTTGCATGGCACTCGT
CAATGAACGTCAATGCATTGTACTTTTCAGTCCAAATCACAAATCTCACTCAATGGTGCA
ACAGTCCCATCCATGCTAGAAAACACCATCAGTAGCAATAAG
>cap3_Contig530
AACCTTAACAACAGTCTCAATATCAATCTTCCCTTGTTTCGCTCCATGAATCTCATGCTC
GAAACTATCATCGTCCAGCTTTGATTGCAACATGTCAGCAGCTTTTGATATATCGACAAA
CAGATTATTAATAAAGTCACGAATAACAGTCTCTGTGCCAGTTTTGAATGGTCTACTAAG
CTTATTCGAAAGTTCTTCTTTCCTTTCTTCTTCTATAACTAAATTATATTCATCTTCAGC
CTGAACCATCGCATTTCTTAGTTGATCTAAGCGTAGCTTACTACTCTGTTTCAACTGCAG
AATGGATTCGTAATCACCTCGAAGAAAAGTCTTGAGATTACTTATCGATTCTCGAAATTG
ACTCTCTGTATCATTAAACTCTCTCAGCAAAACGTTTAATACTTTGAGTCGATGATTGCG
AGTTCGTTCTGGAAGTTTTTTATCTTTTTCAATCAGGGAAATAGTGGATTGCAACTTTTT
GTCGGCTTTCTTTTTAAGTGAAAATAACTTATTGATTTCTAATTTCTGACATATTCCTCC
TTGTTTCTCTTTTAGAAATGTTCTTGTGGATGC
>cap3_Contig531
AGGAGCATTTAGTACCTTACCAACTCCCTGTTGATAACAATAGTGATTATGGCCTATCTT
TTACACTAATTTATCTAGTATGCATAAACATGGACTCGTGAATTACGAATGACTGTATAC
TATGATTCCACTATCACAATGAACAGTTTCTTTTGAATTTAGATCCCTTTACTATCCTTG
TAATAGTAGGATCAGGCACCACACCATTAGGATTTTTTGTTGAATGATCTCCGTACCAAA
TTGATACCTCACGTGTAACCAACCGAAAGTATTGTCTGTAAGTATCCACCTGTAATGGCA
GCGATTTATAAGGAGTTCGATCAGTAATCCAATACATTACATTGGGTTCCATCCTAGTTC
TTCCTTTTATTGGTAAAACCTCTTCCAAATGTTCAACATCCCCCAAATCACCAATTATTC
ATTTCCATTTTCATCTGAAGTTACTTTGCAGTTGTAAACTTCACAAGAATCACTTACATT
AGACATCAATATAAATTCCACCAACCATCGTGAACTTGATACGCCTCCCCATTCACCACC
T
>cap3_Contig532
ATTGGCTTATTTAAATCGAATCTTGATATGACGAAAGAGTTGTCGTTGAATCTGCTCGAC
GGAGATTTCGGATATGAGACGTGCACGACACAAAGTGATTCGAAGCATTCCAACTATTCG
AGTGATTCGTACGAACAATTTGTGTTGATACAACGTCGGACATTTGATGGAGATGTCGTC
GATAATACCCCCACTGACGTCAACGACGTACGACATATTTATCGATTCACTTGAAGAATG
ACGCATATATATATAGAGAGAGAATGATACAGAATGATAAACAATGCACCTTAAATGATC
TACTTTATTTTGTTCATCATAAAAGAGCACTGGTTGGCTTCAATAATGATTGTTATTTTT
TTTGAAATGATCAGCTTATCTTGAAATAAAGCCAGACATTTTGGATAAAATATCATCTTG
ATGAAAGAATGATTTAATTA
>cap3_Contig533
GTAAATTATTATCTATAGATGTAGATGATAAGGAAAGAATTTTGTTGAGAAGAAGGATAT
TTGTGGGTGTTGAAACAAATGATCTGATCAAGTCATTTGAACTTGAACCAAAGTCAAAAC
AGTTGGATGCTTTCTATGAGAATGTTTACAGATACCATCGTACAGTGGCATTGCGATTGA
TGAAGTATTTTGATACAGGTTTAAAGTGTACTGAGTTGCAGTATATTTCAGCGTTGGCTC
CAAATAAGTACAATGTAGTTTCAACATCATTTTACTTGAAGTACTTAGTTGGCAAGTTCT
CTAAGATCATTGATAATATTGATCCATCAGATGGTGTGGATAAAGTGAAAGAAGAAATTG
ATACATATACAATGGATGATGAGATACAATTTTTCTCCAATGAAACGTTCGACGTATTCT
GGTCAAAAGTTAGTCAGTTGACAAGACGGGGTCTGGGACAAAAACGTACCCCATTCCTGC
CTAAGGTTTGTCTTAGCTACT
>cap3_Contig534
GCTAATAAAAAAGGATATACCTCGCATCCGCTGCATGAAGATCAGAAACGGCTCCTTCCA
GTCGTACACGGACTTGATCTCCAAGTATATCATTACGCTTGCTACATATCTCAAGAAGAA
CTTCTTTGAATGACTTTCTTTCATTACCAAATTGATCTTTGCCTCGATTTGCCGTCTTGC
ACAGCACTCCAGGATTCTTCTCCCAACGGGTAGGATTTTTGCTGTCTTTCACAATAGAAC
AATCTTTTCCACAAAATAAGCAGGCTTTTTTGAATTCAAATGATCTTTCAAAGCTAAAGT
GTAATATATGAAGCCTAATCAGTAATTGAAAATATAAACTGTAAATCAGGTATTTCATCA
GATAATATCATTTTTACCAGTTACCCTAGCGTACTGAATAGTATTGGTGCGAAGGTAAAC
GGGGGGGGGGGAGAGGTCCACGTAAACGGGGTCCACGTGTTCGGGACGCTAG
>cap3_Contig535
GTTGCACAAAAAGTGATAAAAGTTTTAAGAAACTTTCAATGATAGTTATTTTATATTATA
TCTACAAGTTTTAGCAACTTATCTTTGCTCTTAAGTTACTAAATGTTTTCGTCATAAATG
ATTTGTAATCATCGTGTGTGAAACCATACCTTTCAAACACCGACTTGCCACGTTTGCTCA
AGTTGAATGAACATTTTGGAAACAATTGAATCTTTATTGTTGGTTTATACCCATAAGTCA
TTGTTCCTATCACGCACATGTTGTCATAGCAAACTCTTAACGGCAGTGAATGCAATTTAT
CCATGATCACTTGCTGAACTAAGAATTCATGTTTCTCGTCAAGCATTTTATCGGCACTCA
AAGAACGGCATCTTCCGTCTTTTATCGCACAAAGTGCAATAGCTTAAAACGTATTTCTTT
CTTTCTATTGAAAGGGATCTATAAATCATATACGTAACATGTAAAAAGAATAATCGTCGT
CGATGAGAAACGAAAACCGAATCCAAGATCCTCGTAAAGAAACGACTGATGAACTGCGAC
T
>cap3_Contig536
CATGATTTACACGTAATGAGTTTCTTGAATCGGTTAGACGAAGACGCTGTGTAGGCAATC
GTTAGAACTTATTGAACATGCAATAGATAAAAAAGAGATTTTCTAAATCATCGTTAAAGC
AAAAAAATACCATAATGCGTCACATGTTTGTAAGATTCAAATATTTTTGTTTTATACTAG
CGTTCAATTGTCTCGTTGTGCCTATCGCATTACGGTACTGGGCATGTGAAATCTTTCAAA
ATACAAGTAATATAATGGAAAAGGTCACAAAAAGAGCATCTCAGTATACTCCTCATATAT
TGGAGAAGCTAAATAAAAGGAGCTGTTCCCGCAAAAAAAACGTTCTCTTCCTTAAAACAC
ACAAGACAGGAGGTTCGACGGTCACAAACATCTTGAACAGAAATGGAGAATCGCATGACC
TTACATTCGTATTGCCTCGCATGGGAGAAAATCGTCTTGATTGGCCTTGGTTTTTTCAAA
AGGACTCATTTCATCCATTAAATGGAAGCGAGCCAAATATCCTAAGTAACCATGCCAGAT
ACCACCAAGCTAATATGAGAGACGTGATGCCTAATGATACTATCTATGTTACTATACTAC
GTAATCCTGTCGATCAATTTGAATCAAGTTTTTCGATATGACTCTCGATAAGATACTTGG
TATGAAAAACTCGACAAATCCGATCGAGGAGTTCTTCAAGGATCCTGATGGTGTCCTTGT
AAATTATGTATTAACACAAGACTTGCGAATCAATAGTGACCGAATTAAAACTTATACAGA
AATGGAATTGTTTTATGTATTTGGGATTGGAATCGAAGGTATTTTAGAAAACGAAACGAA
AATACAAAACTAT
>cap3_Contig537
AAGGAACCACAATATACACCAAAAAGCAAAGTTAATCTTAATTTAAATCTCAACAATTAT
CAAAACATTTATACAGCCTGAACACATTTAGCCATTGTCTGAGAAGCACGACTGATGCTG
TCAGTCATGTAAAAATCTGAAAGACTGGAATATTGTGGCTCTAACACCATACTTGATGAG
CGGTCACTTGAAATAAGTCCTGCAGCTTGAGCAAAGAAATTAGCATTTTCAACATCCCCA
TATCGAGTTAAATTTGGTGAAACATCTGTTAAGCGATTTCGAATTTCAGTGATATTGTCA
TAGGGAAGTGTTCGACCAGCAATTTGTGATAATGCTCTGATGATTTTCCAGTCATCTCTT
GCAAGGCCAGGTGGAGTGATGGCACGTTTTGTTTCTTGTGCTCGGCCTTCCATGTTTACA
AAAGTTGCAAGCTTTTCAGTATATGCAGCACCAGGCAAGATGACATCAGCAATGTTTGCA
CCAATATCACCGTGGTGACCTTGATAAATAACAAAAGCGTCAGAAGGAAGATCAGCTCTA
GTTAGTCCTTCATTGTCAACACCTAAAAGATAAAGTATTTTTGGAGAGTTAAGTTTGTCC
ATTCCAGGTTTGTATCCAATATCTAAAGCTGCAACTTGACTGGCAACTTTATGGAGAACA
TTCATAACATTCCATCCCTCTTACAAAA
>cap3_Contig538
CTTCAGTGTACAAGTTGGGGTACCACCTCCACCAAGCTTAAAGAATATGTACAAAGAGTT
AGTGACTGATGTTCCAGGTTTTGTACCACCAAAACATGGTTACTTGATGGGTTGGGCTTC
TCAAGGAGTTCTGCTCCTCAATGCCTGTTTGACTGTTGTTGCAAGCAATGCAAATTCACA
CAAGGATAGAGGTTGGGAAAAGTTTACTGATGCTACAATCAAATGGTTGAATGCAAACCT
TAAAGGAGTTGTATTCATTCTTTGGGGAGCATATGCTCAGAAAAAAGGGCAATCCATAAA
TAAGGCTAATCATCTTGTTCTCAATGGTAAACATCCTTCACCATTGTCTGCTCATCGTGG
ATATTTTGGATGTAAACATTTTTCCAAAGCAAATGATATTTGAAACAAAAGGGCAAGAAA
GAAATCGATTGGACATATTTACCTGAATCGATTTGAAGCAATG
>cap3_Contig539
ATTGATCTCGGCATGGTCTGCATTTAGATTACCAATAATTGTCTTGGTTCCTGTTATAGG
CTCGGTACCTGTCTTGATAACAGCATCCGCAAGGTTAGCTCTAGCCTTAACAAGAAGTGT
TCGAATTGTTGTTAACGATTCTTGCAGCAATCCTAGGTCCTTTACGACGTTTCTTTTAAA
TGCATTCAATGGACTGTCTGTGAGAACGATTTCGTAAGATAATTTGTAGATTGTATTTCC
TTCTCCAGTATTCGTAGCACCTACGATAAGGTATAAGCTGTATTCACCAGTATCTTTATC
TTGTAAGGAGAAGGATGAAAGAGCTTTAGCGTTTGGTCGGAAAGTACTGTTCAGTAGATC
GAGATGGTATATGGAGAACTGATCGGTTCTAAACACTTCATGATCGTGAGAAAATGTGAA
GATTCCAACTTGATCAACGTCATTCTCTGGTCGCTGTACACTAGTAACACGTCTTGTTTA
CAATTTGGCACTGAGATAGCCTTCCACTTCATTGCT
>cap3_Contig540
AAAAGAATACTACGAGAAAAAAGTTAAAAGGAACGGTAAGTTAGGTTGAAAAAGCAAAAG
AATTTAGAAAATGAGATTTTACTTCAGATGGTAAGCAAGAAGCTGAATAAGAAAGCACCT
CTTAGAAGTGAATTAAAGCGGATTCAAAACAACTTAAAAAACATTGGTGACACAAAGACA
GATTTTTTGAAACAATTAGACGAACAGAAGGGTAATATCGTAGAAATGAAGAACAATGTG
GTTCCTGATAGCGTCAAAAACGAAATTGATGAACATGCAGCGCTTGTGGACGAAGTGAAA
AAGGATCTGGAGAAGAAGCTTGATAAGATCATGCAAGGTGACGAAACAGAGAATGTGAAA
GAGCTCGGACCAATACAAACTACCTCCATTGTTCTCAATTACCCGCCTAATAAATTGTTG
ATTGGCAACAAGACGAATAATTTAAAACTTTCAAAACAAATTCAAGCTTTTAAAGAAATG
GAAAAGGTTGTGAACGATAGTGTAAAGGATTTACCTACAAGACCTCCTCCAATACCAGCT
GAAACTGAT
>cap3_Contig541
GCGATCTGTATGCGCGCTTCTATTTTACAGTTGATTTAATCTAATACATATATAACGAAA
CATTTACGAATACTTAGACGATAACCCTTTAAGAAAGATTATAACCGCGCCCTTTAATCG
GCGGAGAATTCCAATGTGCCGAACTTGATCGGGTGAAATATATTTTCTTATTCTTCTTGA
ATATTTTCTCCAAACGTAAAGGTTCCATGCAGTTTATAAATATATCATCAGGATTAAGAT
TCATATAAAATTGTTTTAATAGTTGACTTTTCAGTCGCGAACCAACTGCCCAAGATGGAA
TGCGTTTCGCAGGTTGCGACTCGTCGTCAGTCGAATCGTCGGAATTAAGTCATCGAGTCC
GTAATCGACGTATATGGAGTCCCGTTGGTTGAGGGGCACCGTTGGTCCGGTATATTTGAC
AGGTGCGTGCTCTTTAATCGCGGTGATGCTCTCAATCCACTCTGAACATCGAGGAGTGTC
TTCGTGTAGCCATGTTGGTACTTCAATTTCATCTC
>cap3_Contig542
TGTCCATTTTGACCTTTTTGCGAAAATTATTTCCCGCGAAATGTAAAAAAATAATCGCGA
GTAGGCTGATACCCGAAAATATCTGGACGCGAAAATTTCTGAGATTAGAGTTCTAAAACA
TTCTCTATGTGACAAAGTGAGCTCCGGAAACTAATCGTCCAACCAGCGTCCAATTATTTT
CCCGATGTTATACCGCGCCGCCATCAACTCAGCAGGATCGCTTGATGACGGGGGATACAT
GTTAGAACAGTGAGCAGTACCATGAATATAAATAGCAATGATGGATTCCTCGCTCTTCAC
GAAGCTCAACGCATGCCATGGATCGATTGAACCATTTGGAAAGATGATCCTTGTCGCACC
TTTCGCAAGTCCATATCCTCCGTAATTGGCATTCGTCCAATCGATACCTCGCTGGTTGTA
AGTTTTGTTGAACTCCGAACCGTAGATGTCAACGCATTGTTGAATAAAGAAGCTTACGG
>cap3_Contig543
GGAACACGACGACCTTGACGCCGTACGAAATAAGCTTACTAACGGTTTTGATGACGGGTT
TCATGAAATCACCTTCTTGCGCTCTAAATACATATCTTGTTTGGTAGCCCCACCTCACAT
GTCTCGGTATGACTTTCAACTTGTTTCGGATTGGACCATCCATAACTCTAGCCAAGTCAG
GACTATGGTACACTCCTACGTGGCGTTGGAAAGCACCATCGTCAACACCCTCCATCGCAG
GGTCCATATCAGCTGTGAAGAAATAGGGATGTGTAGGCTCGAGAACGTTATAGAAACTCA
CTTTGTTCGTTGTTTGCCAAATAACACCTTCAGCGCCTCTCCACGCTTCCGTGGCTGATC
TCCACTGTCCCGCTTTAACCGCCCTGGACGCCCTCTCCGCAGCTCTGTTGACGGCCGCTA
GGTCCTTTCCATCTAACAGACCTAATTGGTAGAGGTATGGGCCCCAGGAAAGTGTCGAAT
CTTCACCTGAGATCCATGCGTCCCCTAAACCAACTCCTTTAAAGTTGCATTCGATTTCAT
GATGTTGAATGGCTTGGTAGAGACGGTTTCCAAATTCAGCAGCCATTTTACCGCCTATAG
ATTCACTGAAGATATAGAAGGGTGTTTTTCTGTAAGGC
>cap3_Contig544
ACAACTGATGGTATTCCTACACTTGGAGGTGCCTGTTCTCCACAATCTCTCTTACAAAAT
TTGTTTTTCATCTTCTCCGCTGCTAATTCTGCAAAACTTTTGATCAATTCGTCCTTCATT
TTGTTCAAATCATCTTGGCCACAGCAGCAACCGTCTGTAGGTTTTTCTATAGGGGTTTCT
CCTTTATGGCAAGACGTTTCTGTCACATTCTTTACAAATTCTTCGTTTGATAAACTTTTA
AAATCACGAGCCGCAAAGACTCGGTGAGGATGCCGAGTAATACGTTTGAGCTGATTGAAA
TCCACAGTGTTGCCAATACCAATAGCGTAAATATTAACTTTATCATTGTAAAGCTTTTGA
GAGGCGGCGACTGGATCGTATCTCTTAGGGTTCTGTTTCCCATCAGTGATTAAAATAACA
ATTTTCTTCACACCTATTGCTCGAGCTCCATTTTTCGATACAAATACTTCTTTCTCAACC
AAATTGAAACCAAGGTCCATGCGAGTTCTGTATCCTAAGTACGGAATATTCATCACACTC
TGACCGAAACTAGAGGCGTGCATCTTGTTGTCTAATTTTAGACTAGTTTTTGTAAAAGCT
TGATTACTTTTGATGTGATCGCTGATACTACCACAG
>cap3_Contig545
GATGACGAAGAGTTTCCATCGGAAACACCGGAAATGACATCTTTTTCTCCTTCTTCTTCT
ATCGACAATTCGAATTTAACGTTCGAAACGGAACTGGGCTCAGATATAAGTCGTTCAGAG
GTAAACGAGTCGAATGTTACTACCGAAGCGGAGCCAAACATTTCTGATATATCTCAACCT
TCCTTACTAAACAACTCTTCACTTGGCGCTGTCTCTCTGTCGTCGCTAAGTAGTGAAAAA
AACAGTGAGGGGGAGGCGAATTGGAAACGAGCACTGCGGGGGAACACGATGATTCTCTTA
GTGATAAACAATTAGATTATTTAAGTGAGGAAGAAAAATCCTCTGAACTTGATTTTGTCG
AAAATTGAGAAATTCTAGAATGTAGTTATCGAGAAGTTAATAACTTTTTTTTAATGTATT
CTTTCTTCTAAATGGCTTTAGGGGATGGGGTAGACGAGGTTGTGTTTGGAATAATAGATA
GTTGACAGATGTAGTCT
>cap3_Contig546
GTGAATAATGGTAATATACAGTACTGTTATCTGATCTTTTGGAATGAGAAACCCAATAAG
CTAAGAACCAATCACTTATATTTCTTGATGCTTGCATCAAAAACAAGAAAAGAAGGATAG
ATATAGCAAGTATACTACCAGTGGCTAACCAATATGATTTGTAAACAGTGTATGAAAGAA
CTCCCTTCTCTCTATTTTCTTCCTCTATTAATTTTCCTTTATCATCTTTTAAACTGATGC
TGTCCAAACTAATGTCTTCCATTGTCTCCCTTTCAGAAACAGATTCTGTATCGTTACTGA
TAACATTAAGATCAGCAGCTGATAAAACTTCATTTGGCCTTCCACTAGATTCTACCATTC
CTTCATCTAAAACAATTACAAAATCAGCTTCCTTAAGATACTTTTTATGATGGGTCGATA
ACAATCTTGTTTTGTCTCTTAGCAAACCCATAATACAATGTTTAAATATGTGATTAGCAA
CATGTACATCGACAGCTGCTATTGGATCATCTAGTTAAAA
>cap3_Contig547
GGGATGTAGTGTTTTTGGTATTTATCTATATGTCTAGTTATATACTTTCTTACTTTCTTT
AGATATCTCACATTCTTAACTAAATACAAATACTTAATAGTGAAGAAAAACGTAATTGTT
TAATAACCAATATATTTTGACAGTCATAGACGAGTTCTCTCCTTTCCTTGCAAAGGTGTT
AGTATTGATACAGTCATAAAATGTTTATTTCATCTGTTCTTGTTGTTTGGAATGACTTCG
TACATACACTCTGATCATGGATCTTCTTTTTAAGCAAAGAATTATGTAATTGGCTTCATT
CCAGAGGTGTTGCCACTAGCAATACCACTCCATATCATCCAACTGGTAATGCCCAGTGTG
AAAGATTCAATGGAATAATATGGAGAACAATTAAACTAGCTCTTGAGAGCAGAAAATTAC
CCATCACTGCCTGTGAAGTAGTTATATTAGATGCTTTACATTCACTTCGGTCTCTTCTTT
CAACTGCTACTAATCTTACACCTGATGAG
>cap3_Contig548
TTATCGAGGTCCTTCAACCATTTCATGAGTTCAACATACGGTATGAAATCGGAATGGACT
ACATCGTGACTTGGTAACACCATATCATTTGTCGGTTTGTAGTTGATAAATTCATATCAC
AACATAGTAATATTGAAACAATCAAGATGTGTATAAAAGCGTTGAGCAAATTGTGCTTTA
TAATTTTCGATTCTTCCTATTTGTTCTCGTACAGCATGTAATTCAGAAATACCTGCTTTG
AATGGAGTGTTTACAGCATCATGAAGAATCTTAGACGCTGATATACATTCTTCAATACCT
AGCTGATTGTACAAATCACCCTCCTGTAAAGCAGTTACATGCCTTTGAGAGACATCTAAT
CTGCCCACAATATATTTGATCTCTTCTAATAATTTCTTGTTATTTTTCCTTTGAATTTCC
ATCCTGTTG
>cap3_Contig549
GACCAAATAAACAAGAATAGGAATTGTACCCCTTTACGTTACGTATCCAACTACTTCTAG
TATTAGGTTCTAGTTTCTTTATCTAGTATTATAATTTGTGAAGTCTCTGGTTCAGGTTGC
ACCTCACTAGTTGACTCTTCAGTTACGCCACCAGGCTGTGAAGTGGATGGTTCATTTGTG
GTTTCGAGTTCTTTTAAATAATGTTGGACATAAACATACCCGTGTTCTAAGTGTTCATTC
ATGTGGATTGCATGTATTTGTTTTTTGAAATTCTCTTGAAACTCGGACATTTCTTTACGT
ATGGTTCGACATCTCTCCAGTGTTTTCGCTTGACATTCATGCAATTCAGCGAGTTTATTT
AGGTTTAACTGCATATCTTCTAAACCAGCACACGAAACTGTATACTTGCGCTGTACAATT
TTAGGTGTTCGAATAGGCGTTTCACCTTTCATATAACTGTTAAATTCATCGACGTCAAGA
TTCAGAGAGTGAGCATCTAAAT
>cap3_Contig550
TGGCAGGGAAAGTTTTTTCTCAATGTTTTGCAGAGGTCTCCCTAAGAAATGATAGATAAA
TTAAAAGTGACGGTTAGTAAATTGATTCCTAAAAATACTATTGTGTTAGATGAACCCAAT
ACATTGTTAGGTCATATGTATGAAGAAGATTATTTCATGACAGTTGCCAGATTCAATAGT
GGGCCAAGTCAACTTGGCCCGAATACAATATTATTGCTCTAAATGAAACTTCACCTTGTT
CCACATTATGGAATATATTTTTTCAATCATGTTGTCATTTGTTTTGGATGAAACTTTTGA
TTTCTCGATTTTGGATGCACTCTGGGGCCAAGTCAACTTGTCCCATTATGACTTTCATCT
TAGTGAACTAGTGAACTTGGCCCATTTTTCTCAAAGACTAAGAACCTAACTTACTTTCAC
CTATTACACTATTACATTATTCTAG
>cap3_Contig551
AAAACTTTGTAAATCACAACCAAGCAGCTGGGGCTGCTACGGCGCATGCTCCTTCCCAAA
AAATAAAACAACAGACCCGAAATCTCCATCATCATCCTCGCAACAGCAAACCAGCACACC
AAAATGTTCTTGTGGAGATAAAAATCCTTTCAACTTCAACAAATCATTCTCTGATGCAGA
GAAGACCGGTGGTGGTGGCGATGGTGATGACTCGACTTCAAAATGGCGCCCTTTGGTGCT
TTTCATTCCTTTGCGATTAGGTTTATCAGAAATCAATTCAGATTACTATCCATCTCTTAA
GGCTATGTTCACACTGAAACAATCTCTTGGTGTTATTGGTGGGAAGCCTAACCACGCACA
TTACTTCATTGGTTTTAATGGGGACCGTCTTTTATATCTCGACCCTCACACCACTCAGCA
ATCGGTGGAAACGTCATCCCTGTACATGGAACCGTTCCTGATGAGAGTTATCATTGCCAG
TACCCAAGTTTTACTGACGTTTTCAGTCACTGGATCCTTC
>cap3_Contig552
AAAATTAACCCATGTAGAGTCGATAATGACCGGAGTTTGAATGACATTGAATTAGATGAT
AAACTGCAGGACAATCACAATTCATGTTACATCAGCATGACTTTCAATCACTCGTCCCAG
TCCACTGAACTCTCAGCGTCAGTAGATTCTCTTAATGCTTCTTTCGACAACTTGAATAGT
CGCCACGACGAAGAGTATGTTACTGTTTCACCCCCAACGACCCCGAGTGAGACTTCAAAA
GAAGTGAACGTACCAAGCTATCTTGTTAATAAAAGATACATGTCTATGAAGACTCCTGAA
TTACCCAAAAGAAGTACGGACGTTCCAAGACTTATGAGCGTGCGTGATAATAAAGCCAAC
CCTCGTCCTGTACCCCAACCAAATTTAGGTAATACAAACCATAATAATGATAATAGTTTG
AACTTGAATATATATGGTGTGACTGAGGTCTTACACTTGCTATCGCGTCTCTCCCTTACT
TTCTCTCAAGATAAAATTATCTCCCTAAATATTGACGGCGACAAACTTTCTCATTTTAGT
GAGACACAATTATACGGAATTATTGGACTTAGTAAATTCGAGTCAAGGATTTTATATTTT
TATGTGCGCGGTTGGAGACCTACCACAGAATCAAAAACGAATTGGC
>cap3_Contig553
GTGAGGTATATTTCTTAGTAGTAGGCAATTTTGAGGACATATATCTCAAAATGTGCAAAA
AATGAGGGTAAAATGGCAAAAATGAAGGATTTTCCCTCAAAATTGCACATATTGAGGGTA
CCCTTGTTAATTATGGCTCCATAGAATTCACTAGGTTAGAGAATTGTTAAAACTATTAAA
TTTTATAGATTTTAGGCCGAATGACAGTTTTGTGCCTAATTTTGAGGGTAATTTTGAGGA
TGACCTATTTGAAAGTCAGTCAACCTGTATCTCTGTATTTTGAGAGCAAACTAGGATGAT
TAAAAGTATTTTCATTATGGATGTTGTGTGTAATTTAATAGGATATCTTTTACCTCAATG
AAAAGCACATATATCAAAATGTGTGCATCTATGAACATTTAGATGTTTACTTCTTAGTGG
TAAACATATTGTTCTATATTTATTACAACTGAGATTAGTATGGGGTAGCTTAACAAAGCT
ATTAATCAAATTGGCCCCTCCTATTGATTTACCCTCAAAATTAGGGCACATTCTAATAGA
GAGCCTTTATGAAATATGATAACATCAAGTATAACCCTAATTACTTTAATAAGTGCACCT
TTTCACTCAGATAGATCAGTACCTTAGGTAGAATTTTAAAACTATGAAATGCTTGGTATA
ACGTTCATTCAATCCAATTATTTAGAAGTTTACCCTCAAATTTCTGCACATATATTTTTA
GACATGACTTAAAGCCATGAATTATTGTGTACATGGTCTAAATAGTTCATTTTCTTCAAG
GAGAGCATTGATTTGTC
>cap3_Contig554
GGAATAGTCTTCATGAAATATTTCCAATCTTTACCGCCTTCGGCTTCTGGCTTCAACTTT
CCTTCCATGAGAGTTCGACCGTGAGCCATCATGCGGTATCTTACTAATGCTTGTGAAGAA
GGGTCTCGTGGGGTGATGCGGTATTGGTACGTTAAGCAAGCTCCTGCTTGGTCAACCGTA
AGGCCTATAAGTATTGTTGCATTTCCAGAATCATGTTTGGCTTTGAAATATTTGTTGGAA
CCAGAGTTATCTGAGGCAATTTTGAATCCCTTGCTGTTGACACCTAGACACTTGGTCGTA
GCGTCGAAATCACAAATTAATTTGTAGGCGCTTGAGTGGTTGACGCATCGGCCAGGTGCT
ACGAAGATGTTATCAAGAGCAACATCACTCTTGTAAGATGTGCCCACTGTGGCGTTAATC
ACGACCATGAAAAATTTGTTTACTGGTAACGGACAAAATTGAACTGCCATTTCCCGCTCC
ACGTATTCTTTGTGAGATCATGCACGACCTGCGAACGTTTACTGGTTCTTATACCACCAG
TTAAACGACCATCTCCGTGTGTGTTGGAGTAAAGGTACATACACATTGGGCGTTTCGAGT
AGATGAATCCACTATACATAGTTGCTGAATCTCCAGGATTG
>cap3_Contig555
GCAATCTATGTTGAAAAACCGGCTGGAAATGTTGTTAACAGTAATGCCAAAAAAGGAGAA
GCTTTGTTTTACCCACACTGTGAAATCATCACGTTGGAGAACCTCCCTGACTTGTCTTCA
ACACACCAATGTGCTGTCAAACTACAAGCTGCAATCGGAAGAAGTGATGAATCACGTTAC
TTATCGAGTTTAGAGGAAAGTGGTTGGCTGCGACAAATTGAAATATTACTCGATTATGCC
ATCTGTATTGCTGCAAAGTTGAGTAAAGATGGCACTTCTGTTCTGTTATCTGTTGGTTCG
GGATTTGAGAGAGTTGCACAGATATCTAGTTTAGTTCAAATTCTTATGGATCCATATTAC
CGCACGCTAGAGGGATTTCAGATTTTGATTCAAAAGGAATGGATTTCAATAAATATCCAT
TCCAGAAAAGGAATTTGGTCAACCTCAGTTCGCCTGAAGTATTATCGCCTCTCTTTTTAC
AGTTTATTGATTGTGTTTGGCAGCTTACACAGCAGTTTCCAACAACTTTTGAAATTGGGG
AT
>cap3_Contig556
ATCAAAAACTGATGTTGATATATTTTAACCCCATTCTGCATCACCATATTTAAATTCGAC
CGGTGGTCCTCCGAGAAAGGTGGTAATTGCTCGGACGAAGCACTTTGGATAGTTCCACTT
GGTATGTTTTTGAATATCGTTAGTCTGTTGACGAATGATGGCACCGAGTACTCCAATACC
TCGCCAAAAAACCAGAACTTTAATTGAACAAAGAAGTCCACCGTACATAGCACCAGCCAC
AGCAGGCGTCCACGCGTCTTGTCCGGCTATATATAAGTTATCGATGGGTGTGTCCGCCCT
CATGATCCATTTCGCGTTGTCCGGGTTGAAGTATTCAGTATTGCATCGAGTTCCGTACGA
TCCGCCTTGATACGATTGTAAAAAGTTCGAGTCAGATATCGGTGTTCCACACTCGTACCA
TAAAACTTTACCTTTCACTTGAGGAATCTTATCATAAAGTACATCTAGAAGTTTCTGTGC
GTAATTTTTCTTATATTCATCATAACCGTCTCCGCGTTTGTGTGTCCTTGCGTTCTCCCA
TTCTTACCG
>cap3_Contig557
CGTGTTCACCATTATAACGACGTTTATCTATACCGGACAAGTTTGATTCCCGATGAGCTT
TTGGAAGATGTATTGCATTTTGCTGCCATGTACCTCATCCCGAACTTGAAGCGATTCTGC
TCGAACCGTTTAGAGAACTTGTTGAGTGTCGAGACGGTTCTCGGTGCGTTCAAACTGTCC
CGCTTGTACGACCTGTCATCACTCGAAGCATCGTGTTGTCATTTCATCTCTCAATACCTA
GAGGAACTCATTCACGACGAGGAGTTTGCCGACATTGTTATGGCGGATGTGAACGCCATC
C
>cap3_Contig558
ACCAGTCGTCGAAGTATGTTTTGAATCTTATATCAATACAGTTAACACTATGCCCTTACA
AGCTAAAGAATCAGTTCACGAGACAGATGTATCTGTGCAACCTTGTAATGAGGAAAGTCC
TCTTCATCAACAGAAAAATTATGCTGATGACCTGAATCATGTGTATGAAAGAAAGAATCA
CTATTATGTATCTGAAATCAGAAAGTTGGATAATCTAGAAACAAATTCTCACATTGTGGA
AGAACGGATTATTGAGAACGATTATGTTGAAATGTATGCAAATAACGAAAGGAACGGCTA
TCATCTAGAGAACAATGAAATGAACCATTCATTTCCTGTTCCTCCACAAGAAGATAGGTT
AAGTCCAGTATCAAATGGAACGTCCGAAAGTGATTCACAAAGAAATGAAGATCGGGATGA
GTCAGAAGATGATAT
>cap3_Contig559
ATCGGGATGACGGAACGTAATACCGTCTTTCCAACATGTTAAGATTTGTTTGTTGATTAA
GTATCCGATATTGTTTACGATGGAAATCGGCTTTTTGGAATTTTGTCTCGATAAAGATGA
GGTGTTACTAGAATTTTGGCGCAAGATGGATGGAGTTTTACTAGAATTTTGGGTTAGTGT
AGATGGGCCTTCATCTAGGAGAGTATCGTGACTCGAGCAGCTTTTAAGAAAGACTTTTGG
TCCTTGTCACGAAGGGTACAACTTGATTCATTTGTCGAGCGTCTCGATTCGCTATCCGAA
TAACTTGTTTCAGATACTTCAATACTGTCTATAATACGACACAATACATC
>cap3_Contig560
TTGATTTGCACAATGCCGTCATTGAATAAACTTGAAGACCAAAATCGACCTTTTTCCGTG
AAGGTAATTGTTGGTCAAGGAGGACTTACATATGACATTGGTACTGTTGCGTATTTTGTG
AAGGATCAATCAGATACTTTGTATATTTCTCTTGCTGCTGCTGCAGGTGTTGTTGTCATT
CTCATCGTCATCGTGAGTATCTTGTTGTATCGAAGAAGACATTTGAGGGATAAGAAAGAT
TATCATAAAGATCTACAGCTACACATGGATAAAATTGAATCCCAATATGCTCGTGAGTGT
AAAGAAGCCTTTGCTGAGTATCAAATCGAAAGATCAGATCTCACATCTGACGTCAATCAA
GAGTATGCACCTCGACGTGAATTCCGCCAGTTTGCAATGAGAGTACTCTATCCT
>cap3_Contig561
ACAATGAAGTTATTTCTAAGGTACAATTCATTACTAATGATTATGATGCTTCACAATCAA
GTTCAGCTTGTAATATATTATCTACCTGTGGAATTGAATGCATTGATGAAGAAACTTTTG
AATGCAAACTTTGTTATGATTTATTGTTCCAGCCAGTCACCATGACATGTGGTCACGTAT
TTTGTAAAAAATGTCTTGTCAAGACCTTGGACTACAATGCAGTGTGCCCTATATGTCGCT
TGGATCTTTCTGACTACAGAAAGAAACGAGTAAAACCTGTGACCATATTACTGGAAAATA
TTCTGCAAACTCATTTGAAAGAACAATTTAGTAAAAGAAATGAGGAACATATGGCTAAAA
TGAGAGAACTGGCAAAGGTTGGAATAGATGATACTGTAGATCATCCAATATTTGTTGCTG
CTATTGCATTTCCTAATGTTGAATGTCC
>cap3_Contig562
TTTGATTCACTATTTATATTATGAGTTTAACTATTTTATTATGTTGGATGTAGAAAATAA
GAATTGTATAATTCATTATTCTGGTTACGATAATTATTCAAAAATAAAGTCTATAACTTC
GCAAAACGAAAGTCGAATTAGAGCCGACAAACTAAAAAGGGAGACAATTGTAGGAGATAA
TCATCACAAGAACCAATGTGAGTTAATTCCTGAAACTTTAAATAATGACATCCATGGAAT
ACATATTACACCTTGTATAAGAAATTTACTCTAATTCTTGCTGGCGATAACATTGAAAGC
CAAGGTAACTCCAGTAGAGGTTCACAAAGGCAACCTGGAACCAGTAAAGCTGCATATGGG
TTTATCCAAATGTTTGCAAAATTTGGAAATAAAGGACGGATTACTTACCAACGTAAGAAA
GTCGAATCCAATAACCTTTGACTACTCATGATGCATGGAAAAC
>cap3_Contig563
GGATTCGGTGCAAGAATTCAAGGACAGGTTTACCACAACTTTCATTTAAATCAATTATCA
AATCCTGATTGTTTTGGAGTGATGGGAGTTGTTGAAGCATATCATAGATTTTTACCAACA
GCAGAACTATATGGACCTACAAATTTTAGTCCAATTATAAATATGGTTACAAATGCTGCA
CAGTCTCAAGGTGCTGTAAAGAAATATCATATATTATTGATTCTTACTGATGGTGTCATA
TCAGATATAGAGCGTACTAAAAGTGCAATTATAAAGGCATCTAACTTTCCTATCTCAATA
ATAATTGTTGGCGTTGGTAATGCTGATTTTGATGCTATGGATGAGTTAGATTCAGATGAT
GGACTTTTTGAGACATGAGGGACTTGTTGCTAAGCAAGATATTGTTCAATTTGTTCCTTT
TAATCGATTTTATGTACCCTTATGGTTCGTCAGATAATCTTGCAGAAGAGGTTTTACGTG
AAGTTCCTACACAGTTAGTTACTTACATGAAAACTCATGGTATCAAACCAGAATTTAGAA
ATGATACA
>cap3_Contig564
TCGAATTAAGAATTTCATAAATATGCATTAATCAATAATACTTTCATAGCTTCAAAGATG
TGTTTTATCTGATTAAAATTGCGACAAAATCCTTTTTTAAAACAAAATAATAATAGAACA
GAGACAAGTTGATCAAAACACGTAGCTTAAAAAACAAATATAATTTCTGATCAAAGAACA
TAAGCAAAATCTATGCATCAAAGTATATGTACAATAAATAGAAATTTATAGTTATGTTTG
ACTTCATTAGAAACTCTGTTAATAAAGCACCTGCCTCTGTACAACAAAACAAAATATAGA
TATCGATTAGATGCGTTAAGCAGTTGACAAGGTACCTGCCTTGCCAACCACAAGAAAAAT
GCTAAACATATCTAACAGTAAATATAGACACAATATATATAATCCTCTGTTAAATTGACT
CGTGAATAATTACTTATGAAAACTACAAGTGTCCATCTCTTGCAAAAAATGCAAAACAAT
AAACCCCGTGATAA
>cap3_Contig565
GTGTGGCAACCATGATGATCAAACATAGGTGAATGTAGACAGAAAAAGTAAGTAAACGAT
ATGAGTATAATACAATAAGTATAGTTGGTGCTACATACATAGTTCCAATAAAATCTAAAA
ATAAAGTATAGTATCAGATATATTGTACATCAATGAAATATATCTTGAGTGTTATAATGT
AAACACAACTTCAGGTACAAGTAAGCTCTTGAGATACATTACAGAGTTGATTCCACCCTG
GAATTTGCTACCGATATTAAACTATAATTGAATTATAGTAGTCGATTCTAGAGACGGATT
TATGAAATAAAGTTATGTGAATTATATTGATCAATTAATAGTTGATTTAATGTGGAAAAC
TAAAGATGATGGTATTCTTTTTGAATATTTGATGAAAAACTAGAAGTTCAATAAAGTAAG
AAGAACTGAAAGACCTGACGAAACTAAAAGAACTAAAAGAGAAAAGAATGAGC
>cap3_Contig566
ATGTGTCAGTTTTGGGTTTTGGTGACAAGCTATACGTAACCTTTAAGTATTTCTTGACAC
TTGGGCAAATGAGATTTCCTTTTGACTCTAAAAACGCTGGTGAAACTGGTACCTTGCATT
TGTATTCCCCGGAACACATCAAATTCAACTTTTTTTCTGATGGAATCTGGTGTTGGTTCA
TTGCACATCTTCTCGCTATCGAAGATTCTACTTGAACACGTATGGTTGTTATTACGTCCG
TAAAATGTGTCTTTAATCACAAGTCTATTGTATCGGTTTCGACAGTTTAAGAACATATTA
CTTTCTTGGCACACGGCCAAGACATGATCGATCTCATCTGGAAGGCTTGAAACAGGTTCT
TTAATCAACCAAGATGTCAAAACAGTTCCATGCCAATTCAGAAAAAAGATTAGTGTTACC
CATATTCTGTGGCGAGTACATTGTCCCATGCTTCTCCAGCAATATCATTGGCTCTTTCCA
ATCCTTGCATTAAATGGAATTTTTATCATTACTAATCTATTATCATTCC
>cap3_Contig567
GTTTAAAAGAGTATTGCTTGTCAAGTGCATTGCGAGATAGTCGATTTCATCCTGTTACTC
TAGACGAGGTGCATAAACTTCACTGTAGCGTTTCTTTGCTCACAAATTTCGAGAAAGAGA
GCCACTACTTAAATTGGGAGATTGGAATTCATGGTATTAGGATCGAGTTTTACAATGAAA
AAGGTCATCATAAAACAGCTACTTATTTACCAGAAGTTGCGAAAGAGCAAGGCTGGAACC
ATATACAAACAATAGATTCGTTATTACGGAAGGCTGGTTATCGTAGGACTATAACAGAAG
AATTTCGAAATTCGATACAGTTGACTCGGTACCGAAGTGAAAAGATAGTTATGAGTTATG
ATGAGTATATGGCTGGTGGTAGTTCTTGAACTTTTCTTTTTACAGTTTTTATGTACTCTT
TACAATTTGTATATGTACACTTTAATTTATAAACTAATT
>cap3_Contig568
GATGAGCAAGGTTCGTGGTAGAGCTACTATATCTACAAACATAGTTTTCTACAAGAAAAT
TAGTACTAAATACAAGTAGTACGTTAAAAAACAAAAACAATAGTTGATACAATGGAGGAT
GTTAATTGTTTAAACAGATTTCAGAATGTCTACTAGTGCGCTGAATTGTTGTTGTTGTCA
TAATATTCAGTGGAAACGACAACAAGCAAGCAAGTAAATAAGTAAACAAAGAAATCAAAT
CCAGCCATTAAAAAATTTAGGTAACTAAATGAACGAGTACCAAGTATTGATTGGAATGTG
TTATGGAATCGGATCGACGCAAGGAACGATACGTCTTGATCGACGGTTTTGAATTTACCG
AGTTCGTCTGTGTTTGGGTGTCGTTGGTTTTCATATTATTCGGGCTCAGTGTTCGCGCGT
TGGGATTCGATCAATTTATTAGCACAAAATACAATTTCCGTGGAGTACTGGAAGTTAACG
AATTTANGTTTGTCCTCGTCTCGTGGTTTTATTGATGCTGTTATGTTATTTAGC
>cap3_Contig569
ATTTTAAATAAAAATAGTTTAGAAAATAAATACATAATTATTCATGATAAAAACTTCTAA
AATTCAAATTTTAATAATCAGCATTATGTTTACCACCAAAATCACTACTTTTAGATAAAC
CAGCGACTTGTTTAGTTTGCATTGCTTCCAATTTCGGACATTCAGTAATTCTATGGCCGA
GACCACCACAATAAGAGCATCCTTTTTGATCTCCCATCGTTAAGTATGGTACTTCTGATT
CCAACTCTTCCAGGACTGGCGGTAATTTCTGTTTAGCCTCTAGAAGCAAATGCTTCAAAT
CTAATAAAACAGATTCGTCACAATTCTTGTTGATAAATGTTGTAGCAACACCAGTTTTCC
CTGATCGACCTGTTCTACCGATACGATGGACATAATTTTCAATATCTTCAGGCATATCAT
AATTAATAACATGTTGAACGTTGGGAAAATCGAGACCTTTTGATGCGACATCTGTAGCAA
CTAAGACGTCCTTTTACGCTCTCTGAATTGACAAATAGATCGATGACGTTC
>cap3_Contig570
AACAACTGGAGATTGTGTTCAAATAAGTGGAAGGGAACCGATCAGAACTGCAGCTGCGAA
AGCGAAATGGACGACAGAAGAGGAGATTGAGTTGAAAACACTCTACGACCAGCACAAGGA
GCATGAAGATATTGTTGGAGAGATTATGAAGAACATGAAGGAACCACGATCCAGGAAAAA
GATCATCAATAAATTGGTTGACTTGCAATGTGTTGTAAGTGCTGCCGATCTTCCCAATCC
TGACAAAGCATCAGGGGGGACAGGAAACTGGACTTTCGAACAAGAAGAAGAGTTGAAAGC
ACTCTTCGAAGAGTATCAACACGCAGAAGACGTCGTTGGTGAAATACTGAAGAAAATTAG
TAATCAAGATTTGACGAGGAGAAAGATAACAAATAAACTGGTTCGATTACGACTGGTAGA
GAACATTAAAGAGTTGCCCAAGCCCCCTCGACCGTCGAAGGCGTTCGCCTGGACTGAAGA
ACAAACTGAAGAACTGCATCGCCTCTATGAAGAATATAAAGAAACGGAAGATGTTCTTCT
CAATATCTTAACCACCATGACGTTCAAGAAATCGAAGAATGCTATTGTTAGACAACTGTT
AGAAACGGGGAAATTGATGAGGAATCCGCGTTATGACGGAAAG
>cap3_Contig571
TTCTCGTTGAAAAAATTGACTGTTGCTTCGATCGTACCTTCTACTTGTTGTGTATTTCTT
TCTACCCAAAGAGTGATACTGTTGCCAGGCAGCAATGTTATACGGGACGACATTTTCATT
TCATCAATTGAAACAGCTTTGATTGTCACGCGACCTTGGCGTAAATATGACTTCAACACG
TGACTGCATTTCGCACATTTTGGGTCCGTTAAAACATCATCGATTACATCAAAAACCTTT
ACGTCCATGTTTCTGAACATAGAGCGTGTAAGCAAAATTTGTCCGGTGTATGACAAAATC
TTTCCTGCTCTAAAGATTGATTGGTTCGATGCCCACTTCAACATTTAATTGATAGAACGA
TTCAATATAGTGAATAACCTTTTGTTATC
>cap3_Contig572
TTGACGAGTCTATTGAAATCAAAGAAGTCCCAGAACGTCTTGTATACGCGGTCTCCGCAG
ACGGTCACGCCAACCCGACCAAAGTAATCGCAATGCAAGATAAACTACGCGACGCTCTTA
CAGCTGACGGGGTCGATTTCGATCGCAAGAAATTTGGTGTCATGGAATACAATCGAATCA
ATGAGTTATGGGGACGACACTTTGATGTCATCTATTCTGAAACTTTGGACAATTGCAAAA
AATTCGAATGCCCAGAGTGCGTTGTTGAGAAGAAAAAAGCATACGAAATCCGTAAATATC
CAGCTTATAAAATTGCTGTAGCTAGAAGTGATAATATCAAAGGATTCCTAAAAGCAAAGG
AAAAAAGAATTTTTTTCAAATTGTAATAAAATACCAACAGGGANACAAACGAAAACCACC
ATAGATTT
>cap3_Contig573
TATCACGGATCTGAACGATAATCCTCCCCTCATAAACCGTAACCACAGCAACGTCATTGT
GCAGGAAGGAACACAACCCGGTTCGAACCTCCTCGAGTTGTTCATCACCGATCTCGATTC
TCCGGCGAACGCCGCTCCCTTCTTCTGTTCGTTGTTGAACGGAGATGTCCGGCGGTTTTG
CGGTGGTGACCGGGAAGAGGAACAACTGCGTCATCCAATCAAAAACCTACATGGATTTAA
GAGAACGTGATACGTATGATCTCGTTGTCAGGGTGACAGATTCAGGTACACCGAAACAGT
TCAGCGACTCGACCATTGAGATTGTCATCGTTCAGGAGAGCCACCACGCCCCCGTCCTAC
AAGCCCCAAAAATGTTCTTCGTCATCATGTCAAAGCCTTATGTCGTCACCAATATTGGGG
AGATAAAAGTCAAAGACGAAGACGTCGATGATCTCCATCAGTTCCACATTACAGCCGGCA
ACAACGACGGTATATTCTCTATACAGGAGATGCGCG
>cap3_Contig574
CATCAAAGCGATTGATGCCAAACAGTCTGTTACTGTATGTGGTAACGAGTTGACTCTTAC
TGCGATGGAGGACGTCGAAGGAGACACGATAGAAACTTATAATTATCATGTGGCCATCTA
TTTCATGAATTCTGTATTCGTGGATGGTGCATTGTTGGTAAAAGCAGATCTGTCCTTATT
GCAAGGAAAGTCGATCTGAAAGAATGTTCAAAAATCCATGGGAGAGACCGCATATTTTGT
TCGGTCAGCTTCTTGATTGGTTACGATACTTCATCGTTTGGTTGCCAATCATCGTAGTAA
TGGTCCGTGGAATTAACTATTTTCTGGGTTTAGAATAACACGTGACGAAGTTGCTGAATT
TTAAAATGTATATTGGATTGTATGCTTAGAATATTCTTTTAGGGAATTAGTCAATTATAA
TTATATTGTTGCAAAAAACTTTGTTGCTTTCAAA
>cap3_Contig575
GTTCATTATATATTCCACATATCGAATACCTGGGAAAAACACAAATTCGAGTGCAATAAT
TCCTTCATCATCGACATCACACAAATTTATTGATGAAAACAGCTGTGATTTAACAAGAAA
CGCTACTCCTCCGTGCATATTGTTGCTATTAGTGATCGGGGTAAAACCTGGTAAAGATGG
ATTCCCTTTTAACCCATTTAAAGCCAAGGATACTTTCCTTTGCTAAAATTTGCTTAAATT
TTGTTGATTTGCATGTTAGAATGTCATAAATCCATTTCAAAAAGAATTTTTGCCGAAATC
TTATTGTAAGGCGTTAAATTTGATGTTCCTAAATGGGAACATCGGCTTATATGAGGTAAA
AAATCTAACAATTATGTTTTATTTGTTGCGGGATTTTAGACCAAAACTTCAATTGTAAAA
CGGATCTGAGAGACCTTCCTACCTGTGTAATGAGATTCTCAATGATGTAGATTGACTTTC
AGGTAGT
>cap3_Contig576
GTTCTCCATAAAAGCCCAATCCTACTTTCCATTGCTTAATAAAGGGAACCGCATGTGATT
CTAGGATGTGCATCTTTGGCGGGACAGTCTCTTGGGGCCAAGTGCTGCGCCAATACTGCA
TCAAACTGACAACGGCAGATTCTAAAGCAACAACATCCACCACACTTGATGAATCATAAT
GTTTGTGGCACGTCGAAAAAAATCTCAAACAAGTTGAGAAATTTTTCTTTGATGTTCAGT
GCCATCGACACAAGAGCTATGTTCTCGGGACATATATCTTGCACCACAACCATCACACTG
GCACATAATTGATCATAGCTTTCTTTCTTCAACATAGCATGACAATGATTGCCTATGAAC
GAATTACTATGAATGACTGGCGCTGTACGTTTCGACTTTGTAGAACTGCCTCTAGAGCCT
TCACTGACGGACCATCCTTCACCATTTTATGTGCTTTCTTAAACTCCA
>cap3_Contig577
GGAAAATTGTTTTCTTCATATGAGAATAGTACTTGCGTTGCTGTATAGCAGCCTTTTTGG
CCTCTTCCAAATCGATGCCAGCAAGAGGTAGTGCTACCTTTGTGATTGTCGTCTTACCCG
GTTTGATCTCGCTGTGAGGACAAGCTACAAAATCATAATGATCGATTTTATCTAAATCTA
ATGGTTTGATCAGTAATGCTGTTATGGCAGCAGCTAATATAACCATGAAGGGATACTGCA
GCACGATGTCTTCAGCCAATCCGATGAAGAAGACGCGCAACCACTTCATGGCTACTTCGT
ACCCAAACTGTTCTGCGTACGTGATGATCACGAGGATGGAGAACGCGCTGATGACGAAGC
AACAAAGATGGCCGATATATACACACCAGAAGGGAAGCATCCAGCGAGTACAAGCATCGT
ATTCGTAGATATCTGGTATGCCATATTCCTTTGCAAGCTTCTCTATTTCTTTCGACTAA
>cap3_Contig578
GCCTTAAATAGAAACAGTGGTCGTTCAATTCAGATGGGAGTGGATTTCATTCGATTGAAA
AGTTATGTGAATGAAGAAAGCACTGGAACTGTTAACATAATTGGAGGTGATGATATGAGT
CAGTTGAAAGGAAAGAATGTGTTGGTTGTAGAGGATATCATTGATACTGGAAGAACCATG
TCTAAGCTTTTAAATACCCTGGATAAATTTGAACCAAAATCAGTCAAAGTTGCATCATTA
TTGTTAAAACGGCGTCCAGATAGTACTGGTTATAGACCTGATTATTTAGGATTTGAAATT
CCAAATATGTGGGTTATTGGGTATGGAGGTTTCGATTACAATGAGTATTTTCGAGATCTA
AATCATATTTGTATTATTAATGAGCATGGAAAGAAGAAATATGCGATTTAATGATACAAG
TTCGACTTGTTTTATGGAGACGATCACTCACTGGAATCTTTCTGATCTCTACACATTGTC
TATATATGTTAATGTCGTTTTTAAATGTAATTAGTACAAATCTAATTTTTTATTACCTTT
TCTTACTGTTACGAATGATGCCATCTGCACTTCATGACTAG
>cap3_Contig579
GCCATTATAACGCAATCTGAGTTCATCTCCCTGCATAAGTCGCATTTCTCCATCAGAACG
TGGGAAATTGAAATATGCAATTCTTTTCTTGTTTAGACCAATGTCCCAGCGAACAACAAT
ATTATCTTGAGACTGAGATTCCTTCAATTTTTTATCATATTCAGCTTCATGATTAACTAG
TGGTCCAAATATGTTCTGGTATTGATAAGCATCTTCATATCTTAATAGCACTGATGATGG
CTCTTCATCAACTCCTGGCTTTTCAAGGTCTTCAAGAACTGCATCAGGATTTTCCTTCCA
CAACTCTTCAAGTTTGTTAATCTGCACAGCAGATATTTGACGAGCTCGAAGTTGTTCCTG
TTCAGATGGTACTTTCACCAACCAGGAAAGAAGCATCTGTCATTAATCAAAGGCTGCCAT
TGACTTTGATCCCAGTTAGTATCCTGC
>cap3_Contig580
CGCGACTTACGCGGAAATACTTGATATCGATACGCCTGATGGCGTTTCAAGTAACCGAAC
TGAATTCCATAGTTGCGAAGACGACGAGAGGCCATCCGTGCTGACATCGACGTTTAATGA
TGTTGATATTGACCCAAGTATGTTCGAGTCTGCGTTCGAGTCTGCTCTTAGTATACAGCC
TGATATTAAAGATGACAGTTCTGGTCACGGATCTTCAATTTCGAGTTCTCCTAGTCATTC
GAGTTCATCCAGCTCTTCCAGTTCTTCCGAAGACACGAGCTCATCTGGAAACTCCAGCTC
ATCAAGTCGATCCGATACAGACGATAAAGACAAAAAGTAATCAAATCATCACCACAAAAT
CGACCCAAAATATACGAAAAGGAATAAAAAGAAAGAAACAAACAAACAAGAAAGACGAAG
AAGAT
>cap3_Contig581
CATTTGATGGAACTGATGGCAATTGTTTGCTCACAATATCTTGAACTGGACGGGTGGGAG
GTGAGAGGAGTACTGGATTACTAATAGTTTTCTTTAATTCTGCCTTCTGTAACATTTTAA
TTTGATTAGATTTACCATTACTCTGACCAATATCAACGTGAAATTTTGATGAAGGATTAC
TCATGTTTGATGATATAGGTCTGTTTATATTTAACGATTTTGCAAGTTCAACTACTGGAT
CAACAGACTCAACAACATTGCTCACTTTCTTTTGATTACCATTTGACTTTTGCTTTAAAT
GATCAGGAACATCTTTGATTGAGTCAACAACTTTATTTGCTGCAGTAAATATAAGTGATA
ATTTTTCAGAATATTTAAGATGAGCATCGCAGACTGCTTGCAGGGAACTTTTTATAGATG
AACTTTTAAAAATTCAGTTTGTAATATTTTTACTTCAAGATCTGCTCTTATATTTTCTTC
G
>cap3_Contig582
GCAACAGTAGTAGAAAAACAAATCAAACGTTAATTAACCCTCCGCCAAGCCCTAATGTGC
CACTATCAAACAGTGATTTTTAGCACATACAATCCAACAACGAATAAAACTTCTACTTAG
CAATATTAGACCCCGTTTTCTTTGATGACCTTTTTTGTAGCATTATGTTCGGCACAAAAT
GCCGATCAACCCTAACCGTATTTACAACACAAATTTCATTCACTTCAAGTTCACTGCACA
CACAGCTCGTCTTCAAGAACATTCAATATTAGAAAGTATGGCTTTACCGTGTGCTTGGTG
TGACCAATTGGTGACGGAAAATGCATTTCGTCCAATCTTCCGTTGCCACGGATCATGCAC
ACATGGTCTGCACCGACGATGCATACCTGACATGTTATGTTACGCGCAACTGACGTCGTC
CGCCAACGTATACATGGACATAATTTTTACTACAAGATGTGCCCGTGTAACTTAGTGGAG
ATTTCGACACCGAGGACGTACGAATCACGAAGATCAAGAAGCTGATTCGTTTTATTTCTT
TCTTTTTCTTCAATAATCATTAATCGTAAATAACAATTTGCTTTTTATTCTCATATGCAC
AACCCTTTCTATAGTTCAATAACATTATTAAGGCCTCAGAGTAATAAATATGCAACACAC
ACACCTAGTAAATAACTCACTCACAACTTTCGGATAAATTGCTACATTTAGTATTCAGGT
TCAGAGAATACCGCTGAGAAGCAGCGCAGTAATATCATTCGTGTCGGTAGAAACCCGATC
GTCACATTTTGTAACTAATTCTTGTTCGATTTTACAATCGCAGCTAAAATCGAAGCTAAA
AGGATTGGAGACGACAGCGAAGATGAAAAAAAGNTAAAGGCAGCAGAGATAAGAGCGTTG
ACAAGGAGAAAAGA
>cap3_Contig583
AACCAACAAACGACACGAATAGGCAGAAGAACGCTACTTTATCACGTCGTGGTAGAACAG
TCTCCCTCGATGACATCCAGATGATATTAGATGGGACAGCAGTGAAGAAGAAGAGCAGTG
CTGAATCATCAACTTTCCGACCTCGGAATGAGGGATCTGTTTTAGACATTCACCCGACAC
CACGTGATGCCGTTCTACCAATTATGTTAAAGTTTCACGTGAGTGGGCAGATTGATGCGA
GGTATGCGTTGGAGTTGACCAATTACAAGTTCCCAAAGAAGCTGATGGACTTCTCACGAA
TTCTCGATGCACAGCTAACAAGATGCTCCGATTGGAAAAAGTACATTCTGTTCATATGAA
CCATTTACAGAACAACACGGATCACATTGCATTCACTTCGACGATATACTTCGAGTCAAG
TATCACGAGTCAACTCGAAGTCACTCGAAACACTCATTAGAGATGATGAT
>cap3_Contig584
AAGTAGTCGCATTCTCATCCTTTGTATTCTTGAGGATAACTCTCCCAATGATTTGTTGTT
GATCATTGGTACCAATGGTTTGTGATCTGTCCCAACTATGAAATGGGGTAGACCATGAAG
ATACATTTTCATTTTTTCAATACCCCATGTTATGGCTAACATTTCGATTTCAATGTTATG
GTACCCTTTTTCAGTTGGAGTTAAGAATCGTGAAGCACATGCAACAGGATACCAGGTGTT
ATCCTGTTGTTGGTATAATATTGCTCCAATACCATTCAGTTGACTACCATCTACTCGAAG
TTTTGTTGGTTTGGTATGGTCATATAGTTTCAAGATGGTTGGATTTGTTAAAATTTTCTT
TATGTTTTGAAAGGACTCCTCATGATGTTCTGTCCAAATCCATGAATTGTTTGACTTAGC
AGATCACGTAGTGGTGCTTTGGCTTCAGCTAGTTTTCATGGAATTTCGCCATCTGTTCTG
CCATTCCTAAAATCGTACTTAATTC
>cap3_Contig585
AAGCCAATCGCACCTGTGATCACTCGAAACCTATCAAAAGATATTGTTATTAAAGGATAT
CGTATTCCGGCGGGGATGACTCTTTTAATGGAACATCATTTTACATCGAACAATGAGAAT
CATATTGATAATCCGACACAATACAAACCGGAACGTTGGATTCGTGATAGTAACAGTAAG
AATAGTCTGAATCCGTTTCTTGTTCTTCCGTTCGGATTTGGTCCACGCATGTGCATTGGC
AAGCGGTTTGCAGAACAGGAAATAAACATTGCACTAATCAAAATTGTTACACAACTTCCG
TATCGAATATGATGGTGATGCTTTGCCACTGAAAGGTATTGGGGTGGATAAGGTGCCTGT
TAAATTAGATTTCCGATTTGTCGAGCGCTAAGGAGATTCTATGTGAAGATTGGTTGATTC
AAGAATGATTTAAAGTAAAAGATCTGATAATTTGCACTCACAGAGAAACGTGACCAAACG
GTTAGATAACAGAGAA
>cap3_Contig586
GGTTCGTTTGATCTTTTCTCATCGACCTTCTTCTTTGATGAATATTCGATGACTCCATAC
AACGTTACACTTATGATCAATACGACAATGAGTATGTACAATTTGACATATGTGCACAAA
AAGTCTCCATATGCAAACGCTATGACAAAACCAAGAGATTCCCAAAGACGATAGTTTGAA
AATGCTGCTTCTTGATTTGTCGGGAATAATACACCATAGAAGGCATTAACTTGAGTTTGC
CAAACTGCATCTGCAAATCCCCACAATGCACTTGCAATAAAAAATAAGTACATTGACGAT
TCGCTTGGTTTCCATATTAAGAAGAAGACGAGGAGAGCGAGATTGATCAGTGCACCACAC
CCTATCATGATAGGTCGTCCAGTTAGTTTGACGATCTTCCCAAGAAGAAGCGAGAATGTG
GCGTCTACCACACCAAAACAAATCATGATCAAACCAACTTTTTCAATTCCAAGTGTGCAT
GTCACGAAAACCTTTGTGAAATCTGCCAAAACCAAACCTTGTTCCAAACCACTAAATAAG
GTTAACGGTGTGAGTAATTGCATGTTGCGGTTCTTCAGATGCTTGAAGGTCGCAATAAAC
AAATGAACAACATTCCTTTTCTTGTTTCACTGACGATGTCAATCTTANCAAAGAAAGAAG
AACACGACAGCTATGGCGTAATT
>cap3_Contig587
CTTTTTCTATTTTTTTGTTAACATTCATATCACTCATCTTATTGTAAGTAGGACTAGCAA
GATTGAATAAATCAGCATCGATTGAATCTTCTATGTTAGTTTGTAGTCCATCAATTACAT
CATTGCATAAATTTAATTTTGATTTAGTTTGGTCTAGTTTAATTATACATTTATCTTCAT
CTTCAAATGTATCTTTGCATATAATTCTGCCAACATTGTCAACAGATAATGGAAAACTTG
TTGGAACTCGGTTTACATTTTCTAAATTGTTTAATGGATTTAATAACTGTGCAACTGGAT
AAAACTGCTCAAGATATTGTGCTTTTGGACCCTTACAACCAGCAGCAGTTCTCCACCCAC
CCTCACATTTTCGATATGAGCAGGAAGCAGTTCGAGGTCAAATTCATTAAACACATCTTT
AATGCAATAGTCCTCATATACTGACAAGTCTTGAATGTACTCAACAT
>cap3_Contig588
ATCAGTTTCCTCCTGTCTTCACAAAAGGAGTTGGTATTGTTGTGTCACCATTGATATCAC
TGATGGAGGACCAAGTCCAAGCGCTAACAGTTGACAAATATACCGGCCTGTTTTCTAGGC
AGCGCACAGACTGATTCTTCACAAGTCAATAACGACATCTTCCAAGGCAAATACCGTTTA
GTTTATCTAACTCCGGAATTACATCACTCACGCGGAAACATTTCTGGCAAACCTTCACAA
AAAATTGGTATCACACTGGTGGCTATCGACGGA
>cap3_Contig589
GGGGTTTTATTTGTTCTTGTTTCTTGATTTTCATGACCAGTGTTACCTTCTGGTTGAGTT
TGCGAGCAAAAGGACAGACTGAAACATGTCTATGCTACTAGAAATTTCTTCAGTGTCACA
CCCAGGCTCAGCCTGAGAAAAAACTTTTTGTAGTTTGTGTACAGCACCACGTAAAATGCT
TGTGTCAGTATTGAAGTCCCAATCTGAAATGGATGAAATGAGTTCAGAATGTTTGGTACT
AGAATCATGACTAGTTGATTGTTCCTGAAAATCGGCACTATTCTGTAGTGGAGTCTTTAT
ATTCGTTTGAGAACCAGCAGAAGAATAATTTGGTTTTGTATTAGCTACAATAATATTCTC
GCTATGTGTCCTCTGGATAGCATAATTATTTGTTGTTGTAACAGTATTCTTTTTACAATT
AACTTGTGAACTGATCGTTGAAGAGTCGACTTTCAAACCTAAACAAGACACTACAGTTCG
AAACATAACAATAATCTCTGGTAACCTTTCTGGTATATCATCTGTAACACGATCTAAAGA
GACAGCTGCGGTCTGAAAAATGTCTATAATTTCTTTTAATTTCGATCTGGAGACGCTAGG
AGAAGCATTCTCTAATGTCGACCCAACAAATTT
>cap3_Contig590
AGTGGACTATGGACTAGAAAACAAAAGTTAAAGACAGAATAAATGAATCAGTAATAGATT
ATTTGATTATATCGGAGGAGCAAAAAAAATTATAGAAAGCATGGACATTGATGAAGAAAG
AAAGAAAACTCCATTCCATGATAAACTCTAGAAATAAAGAAGTTTACACAGACCACAACA
TGATAAAAATCAAATTAAATTTAGATATTGTAGCGGAAAAAACTGAAGGAGAAGTAATGA
AAAGAGATAACAGAACAATGATAAAATTCAAAGAATACACTAATAAAACAAACTTCATGG
CAAAATGCATTGAGATGATTAAAAAAATATATCAACATTCAAGAAATATACACAAAATGG
AATGACGAAGTAATATCAATGGCTAAGAAATTATGTACTAAACAAAAGAAAAAAACATAC
GAAACACACGAAATTAAAGAAGTCCGACAACTAAGAATTGAACAATGCCGTATTTGGTAA
AAACCATGGAAAACCTAT
>cap3_Contig591
GGAAATTAGCTGTTTCTGATCAATTAAACCAAGAAGTAATCAAAGGAAATGCATTTATAG
ATTTTGATGAAGAGGATTTGACTTTTCGACCAACTTATAGGTACAGTTGTGGAACTCACT
CAACATATGTTTGGACAAAACAGAAAGTGACTGGGGAAAAGATCAATGTCCCTTCTTGGT
GCGACAGAGTTTTATGGAAATCATATCCTTATCTTACATCTGTCAACACTGCTTATGGAT
GCACTCAAGGGGTTGTTACTAGTGATCATTCACCAGTATTTGCATCATTTGAAGTTGGCC
TGCTTTCAGAAACTTTATCAACATTGTCATTAGACCCAAGTTTCAATAAAGTATCTCCAA
TAAAGATCATTATAACAGAAGCAAATGCGAGGTTATGGAGTGCTAACTGCACTTATTTAC
TATGGAATTTCATTCTCCCTGTTTAGAAAGGTTTTG
>cap3_Contig592
ACTTATTCATCGGCTTGCTAACTTGATTGAACGAGACCAAAAAGTATTTATCAGAATTAG
AGACTCTTGACAATGGAAAACCAGTCAGCATTGCATTTAATGTTGATTTAGTTCTAACAA
TCAAATGCTTCCGTTATTATGCCGGTTGGACAGATAAGATCGAAGGAAAAACTATCCCAA
TTGACGGAGATTTCTTTTGCTACACTCGACATGAACCAATCGGTGTTGTTGGTCAAATCA
TTCCATGGAACTTCCCTTTACTCATGCAAGCGTGGAAACTTGCTCCCGCTCTTGCTGCCG
GAAATACGGTCGTGATGAAACCTGCCGAACAAACTCCTCTTACTGCATTGTACGTTGCTC
AACTCGTCAAAGAGGCTGGCTTTCCACCAGGTGTATTCAATATCGTCCCAGGATACGGAC
CAACAGCAGGTGCTGCAATTTCCGAACATATGGATGTCGACAAAGTAGCTTTTACTGGAT
CTACTGA
>cap3_Contig593
TGACTATTTTTTCAACTCAATTGACACTTATGCTTAGTTATTTTGTATGTGATTAAATCC
TGCATAGTATAAGATAGGTTTACATACTTAAGAATAACGTGTCCTTAATAACAATATTTT
AGTTAGAATACAAATTATATCCTGCAGCAGCCCATACTTCTTTAATCAGGCAATAACTCT
CTGAGGGAAGACCTATGTCATATAATAACATATACTGATGGTGAAACTTGAGAAATACGG
GCTATTTAAGTTATATATCAATTTTTCATTTCCTTGTTTTAGTGTTAACATGGAAATAGA
ATGAGTGCTGACTGTGGACACAATTTATATCTTCTTTTTGCTATGAAATTATAAAATTAT
GATTCATTCCGATGATAATGCCCATGATTCTAAAAAAGTGACACCTTTTCTCGGAATTGA
AGAAAGCGTGGAACTTTGATTTGAATAAGTTATCTAT
>cap3_Contig594
TAAAACACTTGCCAGGACCATAATGAATAGCAATGATCGTGTGCGAGGTAGCGTCATGTC
GTACAGCAATGACGCAAAACTCGACATCAAATTCAACGACTTCACCACGACAACCGATTT
CAGCGATGCTGTCGAAAAAATCGAATTCATGGGCCGAGAAACACGCTTCGAGCAAGCCCT
CCAATTGGCTAAAAAGAGATGTTTTCGAGTAAGAACGGTGCTCGCGGGGCGGGTGTTGCT
CGAATTCTCGTCATCATCACTGCGAATTCTCAGACATACGAGGAAGACGATTTCAAGCAG
GAAGTGGATGCGTTGAAGGAGGCGGGTGTTCGCATTGTTGTGGTCGGAGTTGGTGGACTG
GCGAAACTCGATGAGTTGCAGAAGATGTCGACCTCGGGTGGTGGTTTTGTTTACCAGGCT
AAATCGTTCGAAGAAATGATTAGTCGCAGGTTTATTGATGCGATTTCATTGAGTGCATGT
ACTGGAGTACCCGGCGGGTTGGGGAGCAGTGGAAAGAGAGCAGCCCTTGTTCAGCTA
>cap3_Contig595
ATGTCTTCTGGTCCCATACGTGGATCGGGATATCTACGTCTATAATCCTTTTCATCGCCA
CCCCCGGGACGCCGATAAACCATACCTCTCGGTGGAGGAGGAGCCGGACCATCTGACGAT
AACGGACGGTATTCCATTTTATATCTTTCTTCGGCGGTCATGTGACCGGGGGGTGGTCCC
CGAGGATCTAGTTGCCGGCGGTCTTTATTATCACGATATAACATATAATCCTGCGACTCA
CGGTCACCACGATCACGCTGACGATATTCACGTTCATATTCTGGGGGTGGCATATAACCC
CCTCTCCCCTGGTGACCCCCGTTCTCATACAAACGTGGCATTTCCCTTGGAAGATAACCT
TTCCTTCCAGGTGAAAACGGTTCTTTATCGTCTCCACCGAATGGCTCGTTTGGTGGTTTT
CGTTGTTCATACAGTCCACCGCCTTTTATATCATCGGGTGGTGGTCCGGGGTATCTACTC
GAAGATTGAGAAAACATAGCAGTGTGATGTTCTCCAATAAACGGAGTGACATCGGAAGAA
GGTTTCTGTTGACTGAATTTATTATTGAAGTTCTCCGATGTAGTTGTACTTCCGGAAGGT
GTGCGCGGGTTTGCGCGAGTAACAGTCCTCCCCAACACACGTCCACCATTTCGTTCCGTT
TCAGAGAAAGCGAGAGCAATAGCAACTTCGAGTGACGGTAAGACTGTATCACTACCCGTT
GTTCTGCGTCGCCGCTTTCTGATCGGCTCTTCGATGACAACATAATGCGCGTCTTTACAA
TGCTTACGTAAGTTATCGGCTCGTATGAACTGAGCCGTACAGAGATGACATTTAAACGGT
TTCTCGCCAGTGTGACGAGTCAAATGACGCTGCAGATC
>cap3_Contig596
CTTCTTTCAGTGCACGGGATGCATTCATTTCTCCTTCAGCAGCAATGACCTTGGCTCTGG
CTTCTCTTGAGGCTTCTGCTTCAGCAGCCATGGCACGTTGTAACATCTGTGGTAATCGGA
CATCCTTGATCTCGACACGTTCGACTTTCACGCCCCATGGATCGGTAGCGACATCGAGAA
TGTGTTGAATACTGTGACTGATATTCTCACGTTCTAACAACACCTCGCTCAAATTCTTCG
TACCCAACTCATTTCGAAGCGTCGTCTGTGCAAGCAATTTCGTCGAGCGTTGCGCGTCTT
CGACGTTACATACCGACGCGACGGGGTTCGAGATACGGAAATACGTGACGGCGTCAACTG
TTATAGTGACACTGTCGCGCGTTAAAATTTCCTGTGGCGGCACGTCGAACGAGATGACAC
GTAGGTCGACTTTGATGTAGTTATCGATACAGGGAAGGATGAAGAAAATACCAGGACCAC
GTGCTCCATCAGACACGAGGCGACCGACACGAAATATAACTGCTCGTTCGTACTCTTGAA
CGATCTTCAGACATGCAAGTAATGAGAAGGGAAAT
>cap3_Contig597
TCAATCAATTCGGATACCTCAAGGGGACTGTCCTCGTCATCTTTTACAACAGCGACCTTG
TTCTCCTTCAAAAACGCATCACCTTCTTCGTCTTTGTGCTCTCCGATGCGAACAACAACC
AGTCGGATCTTGTTCTGCACCATAGTCTTGATGACGTCTTTCGATGCCTCATCAATCGGC
TGATCAACATAAGCGAGTACAATCTTCATCGGGCCACCCTTCAAATTCCCTTGGAAATTC
ATGATTCTGTTGGCTTCAGATAACCCACTTGAGATGTTAGCACTGGCTGGGCGAGTGTAT
GCAATTAGTTGTTCGAGCAATTTGCTCTTGTCAGATGTCATACTGCCTTTGAAGTCGGCA
GGTGAATAGAGCACGCTCCCAACTCGGATCTTAGTTGAGGCAACTGATCGTTTTGATAGG
TATTCGGCAGCTACTTCGATCTGTCTGTCGAAGTTCGCATCAGCATCGTCGACATTCG
>cap3_Contig598
TGGGGAGAGAGTTAAAGAGCACCTCAAGAGCACTCACCTTCTCCTTCAGGAGGATGATGA
AAGCTTTCTTCTGAACTATGTCGATATCACCCACCGCTAAACCAACCAGGAGGTTAATGA
AGGTGATGTTCATCACAATGAAGAACACGATGAGGATGAAGAGACCAACGGCGTGGTACT
TCAACTTCTGCGCCACGAACAGGTCGTCGTAATCGAACTCCCCGATCATCCACACCATCG
TCTTGATGATGGAGATGCCCGCCTCTCTAAAAGCCTTGCTCTCGTCGAGCACACAGTGGA
AGGAGAGCGCGAAGCCTATCACCAAGATACCAAACACGGCAATCACCTTTAACCACGTCT
TCATCACCTCCGTCAACATCTCAACATATATTCCGTAAAACAAACTGCTTGAAGTGAAAC
AAGAGCGTAATCCACGAGAACAGGATGGCGAGTGCGCCCAACTGCCAGA
>cap3_Contig599
AGATTTCAAGAACATGTCCAGCTTCAAAATGTTGGTATCAACAGTGCCAATATTGGCTTT
TCTACTCTTACTATGGAGTCTGACAAATTCATCTGTGTCCGTGAAAAAGTTGGAGAACAG
TCTCAAGTCGTCATTGTTGACATGGCTGATCCCAACAACCCAACACGTCGACCTATATCT
GCAGATTCGGCTATAATGAATCCTGCATCTAAAGTCATTGCTTTGAAAGCTGGAAAAACT
CTACAGATCTTCAACATCGAAATGAAGAGTAAAATGAAAGCTCATAACTTAACTGAAGAT
GTCATTTTCTGGAAGTGGATCTCTCTTAATACAATTGGTTTAGTCACAGACAATGCTGTA
TATCATTGGTCTATGGAAGGTGACTCAAGTCCCAACAAAATGTTTGACAGACATCAATCG
TTAGCTGGATGTCAAGTCATTAACTACAAAGTAGATCAGACTGGTACATGGCTATTACTT
GTCGGTATCTCTGCACAACAAAATCGTGTTGTTGGTGCTATGCAACTCTATTCTGTCGAA
CGAAAAGTCAGTCAACCTATCGAAGGTCATGCTGCTGTTTTCTCTCAATTCAAATTAGAA
GGAAATGCTGCTCCATCAAATATCTTTTGTTTTGCTGTCAGGGGCGCTACTGCATCAAAA
TTACACATAATTGAGGTTGGAACACCACCAACTGGTAACCAACCGTTCCCAAAGAAAAAA
AAAAGAAAAAAAAAGAAAAGAAAACAT
>cap3_Contig600
CGAAAACGAGCACGAGACCGAAGACGAGGACGACAACGACAACGAGAATGGGAACGAGAA
TATTAGAAGCCACGTGGAGAAGAAAACAAAGGGTAAAAAGAACAATGCAGTATACAAACT
CGTTACTGACAATTCTGACATAGACCTTGACAACGAGGACATTATGGAATTCGTAAAAGA
CGTTCCGGTCAAAAACAATGTCAAACGGTCCATCGTTACCGTCTACGATTTCACGCAAAC
GATACACCCCCTTCATTTAAGAAAAATCACCCCTCTAAAAAGTGATAACTGAAGAGGAGA
GAATACCCGCTGACGAAACTGCTGTTAAGAGTAACATCACAAAAAGCTGTGTCCCCTGTC
ACAACGCCTGTGACATTCTTGCGCAATATCGAAGATAGATTTAAGAGTTTATCGAGCGAT
GTGACCGACAAGAAGTTTGTCCCTGGGGATTTCTACAGCTCTACCTGCTTTAAATGCTTC
CCGGACAGACACTCATAAATTAAAAGGTAATACCTGACAACACGAAGCCTGGTACTAGTC
AAGCTA
>cap3_Contig601
CGTTGCTTCGTACAGCCATCTGTGAAGTTAGGAGGCCNGAAGCCACCCACGAGATTGATG
TGGCATAAGATCATAAGAGGTGGTCGACATTGCGGAGATCTGTTAGCTGCGTTCGAATTG
TTCTTGGATGAAGGAGTTGATCTTCCCTTCCCTCCACCCATGAAAGATGCTCGTTACATC
GTTCCCAATGGAATTAGACCTGTGCTGGTCAAAACTGGTGTCGAGATTTTATGCTGGGGC
GTTCGAAACATGAAGAGGTACCAATTAGCTCAAGTAACTTCACCCTCTGCTATGATTGAG
ATTGGAGGTTACACTATTGAAACGAATGTCATCAAAAACACGAAGAAAAATCCAAATTTC
ACAAAGAATGCATTTTACAAAGAGATCTATCTTCCCAAAGAAGCCTTATATATGCCACCT
GTTAACATCAAAATCCGTGATCACCGTACTTTTGGACGTAAACCAATTGTTGGGCGACAC
GTCATTAAATCGATTGATTTAGTTGATCCCCCAAAGCCTGAACCCCAAGCTGAAATACCC
GTTGAACCTGTCGAAACGACTGCTGTTGCAGTGACAGTTGAAGAGACGAAGGAGGAGGTG
GTCGAGGACGTCAAATTGGATT
>cap3_Contig602
CGAAAAATGAAAGGCAAGCACTCAACGAACTAAAAGATGATTCTGAAATAATTATCAAAA
AGGCTGACAAAGGAAACGTTTTAATCATAATGTCGAAATCATTTTACAGAGACAATCTTG
TTATCAAAATTTGAAAATACTTATGGATAAACATAAAAAGTGCTTGACAAAAAAATAATT
TAATTACATAACTAATTTCGACTACAAAAGTAGCAATATATACGTTCTACCAAAGATTCA
CAAATCCAATGAAATAATCAAAGCAATGGAAGAAACAAATGATATTTACGTTAAAATGAA
TCCACCTCCCGATTTAAAAGGCTGCCCGATTATCTCAGGACAAAACTCAACTACAAGTCA
TCTTAGTGAACTTATCCAAAAAAATTATATCCCCAACTGTACCATATTTTAAATCATATA
TCAAAGATGACTGGGATTTCATTCGAAAATTGACCTAAAAACGTTTGTATTTTCCATTGA
CTAAATTATACAGTTG
>cap3_Contig603
ATGATTAGTGATTTGCGGTAATTTGGTATAATAAAAGAGAATAAATTAACTTTGTATGTT
GTCCTGTCAATCACCCTTATTTCTTAACGAAACATTAATCTCAAACAGAGTACAATATTT
ATATAACCCTGAGATTAGCTAATTTTGATCACATTAGACCCAATTTCTTGCTATTTCTCA
AATTCATGGAGAGACAGATTTTTCCTGACTTAGCAGTTTTAACAAATTGAGGCTAGTATA
ACCATGGTTTCTATCAGGGTTGAAGGTAACCCCTACAAATTGATCGCCCCCCATTACTCC
AGCTCCCCCCAAATTTCAAATTTGTATATTTCTGGTCCCCAGGACACACGATTCTTGATA
CAATTAATGGTTATACAGTTATGATTGTTTATTGTTGGTAAGTCTTGATTAAATAGTCTG
TTTGATTTATGATAAAAGTAAGTTTTAAACTGAGTCCCCCAATAATGTCAGAGAAATAAG
ATTACTCCCAAGAT
>cap3_Contig604
CGAAAAACAAAATCCACATTTTTATTTACAATATGGAACCTACCCATAATGCAATAGTAG
ATGAATGGGTAAAGGAGATTGGGGATGAATATAAGTCAGTTGAAAACTTGAAATCGAGGC
CAAAGCTTCTCGAACACAATGCACGAAATAAAGGTATTTTTCGATGGCGACGACTCGATA
CCGACTACTACTTCTCAGTTGACAGTTCGGTGAGTCTTACCAACCAGAATGCATTGCGAC
TTCTCATTGAGCAGAATCGACCAATCATCGCACCAATGGTGGTTTATTATGGAAAATACT
TGAGTAATTTTTGGGGCGCTATGACTCCCGATGGAGAATACGAGCGATCAGAAGATTACA
TGAACATTGTCGATGGTAATCGTGTCGGAGTGTGGAACGTGCCTTTTATTTCTAAAGTCT
ACTTAATAAAATCCTCACTACGTTACAAGATAGGTATAAACCCTATTCACACACGCTACT
TCTGATAACGCAGACACTGA
>cap3_Contig605
CTTCATAGTCAACCATCTTATCCCCAAACTGATAAACCATGCTTCAAGTGCAACAAGACC
TGGACACATAGCAAAGTTCTGCTCCAGTCCAGATGTAAGACACTGCTATAAATTTAATTC
AAAATCAGGGTGTAGTGACCGTCAGTGTGTATTCCCTCACTCATGTGCCATTTGCAAAGG
CGGACATCCAAAATTCAGATGCAATTCAGGATCTTAGATTCCTTGCACTGTGGATGACAC
TTGCGTTAGTTTAGATACTGTAAACATTAATACTCCTGTTAATTTTATTAGATTGAGGGA
AATGCTGGAACCTTATCTGGATAGAGAAAAGGTTAAATTTGTTTTACAAGGTTTTGAGTA
TGGTTTTAGGATAGGGGTGGAAAAGGAAATGGGACCTGGTTCTTCTAGGAACAACAGATC
AGCATTGGGTAACAAAATAGAAGTGTCTC
>cap3_Contig606
CACAAATATAAAACACACCAAGCTCCATCACTCAAGTCTCATTATAACATGTGCGTGAGA
CTTTGGTTAGGTCTAATTCATTTATTTATACCCTCATGAATTGAGTTAGATCTTACAAAA
GTCGAACGTCCATTCAAGCTCAAGGACTAAACAGCACTAAATCAACTACTCACTATCACT
TTATTCTAAGTGAAAATCGAGCTTTCTATCAAACTATTATTTACACTAGCACAAAGTCTA
CACACTTGACATTGAACAGCTTACACGGCCGAACCACCGGAATGGCTAACGGAACGTGTT
GTTGCAAATGCTCCATGTGGGACATGTACATGTGCGCTAACACTTTCATTATCATTTCAA
TCTACAATTGACTCCACGATAAGACCTTTTCGTTAACCTTAACCTAATCATAAAAACCTA
ACTTTCATTATCTATTCATCTACAATTGACTCCACGATAAGACCTTTTACGTTAACC
>cap3_Contig607
GTTAAAGTATGTTTACTCCACAAGAACACTGAAGTTAGAGCAGTACTCTTACTCGTCTTC
GTTTGGAAACAGATGCTTTGCGAGAGTGGGACCTAAGCTGTGGAATTTATTGCCGTTACA
TGTTCGTGCAGAAACGGAAGTGGTGAAGTTCAAGACACTGCTGAAAACATTTCTATTTGA
TGGATTTGATGCTTTCGAGCAAAAACTAAATGAACGATAAATTATATTTTATTTAATAGT
TTATGGTGCACAACTGTGCAAATGCCTCACCAATAAGTGCATTGGTCAGACATGATTCGT
AGTCTTGGGATTAGTAATGATCTCTGCATATTCATATCTGCAGATTATCCATTTGTTAGT
TTCTCTCTCAC
>cap3_Contig608
GTTCTTGGACCCAAAAACACAGAAGATGGTTATCCATTAGACACAATCTCGGAGAACGCA
CCACTATATCCATCTCTACCGACCAAGTCAACTTAACACGATTAAGAGGGTATACTTTTA
TCACCCTCTATCTTTCACTGACGTGATAAAGAAAGTATAGTGAACTTGATTTGGTGGCAT
GGTTCCACCTTAAAATCAAATACTTCTAGTTTAATAGAATGTATTTCTCTGCAGAGGCAG
ACGTGAGGAGAAGTTTTCAGAGAGGAGAGTGGGGAGAGTGTTTTCAGATCTATGTATTCA
AATGGACGCTGTAAATATTGATAACAAATGTTAGTTTTGAAAAATGAGAATAAAAAATTA
GAAAAATGCAGTATGGTAGAAATATATACTTAAATTGAGGTGGATTAGAGAAAGAGTGAG
CCGTCATGTTTCACCAGATTTTAGTTCAGCTTATTAAAGTTCACTATGTTCTTTATACAT
CATTATGAACTATTTCTT
>cap3_Contig609
ATTTTCTCGTTGCTAACGAAAACTCTGATAACCAGCCATATTGATATCAATGGGTGTAGA
CGCAGATGAATCCTGCAACGCCTTCCCAGCAGTCTCGATCTTGAACAGGAACGAGGCTAT
GACGCATATGACGAGAGGTGCAGTGTACACACCGATGACCAGGTATAAAGATTTATGAAT
CAACACCTGGGCAACGAACGGTGTCAACATGGCACCAATCCTTGCAAACATGCTACAACA
TCCCAAACCAACTGAACGAACATTCGTGGGAAGTACCTCGGATGTGTAGACGTATGCTGT
TTGGAAACTACCTGTGATGAGACCTCGCACAATAAACAAGAAGACAACAGATGCTGTTCT
TGTAGTGCAAATACCAATCAAAAGGAATGCTATAGCAGCAAGACCAAACTGCAATGCAAG
AGACTTTCGCCTACCGAGCCATTCGATCAGTAATAGT
>cap3_Contig610
TTCAAAATGTCATTGTCATTATAAAGTTTAGGGAACTTACTTTTTTGTTTTGTTTTTAAC
CAACTCTTTTGTTTTTCTATTATCATCTTTTTGTTCGTCGAAAATTTCTATTTTATCATC
CTAGCAATACGATTCTTCAAATGCATTTTCTTTATTTTGATCTGTTTCAGGTTCGTCGAA
GATATCTATTTCTTCGTCCCAACTGTAACTTTCTTCGAACTAATTTTCTTTTTTTTAATT
CTACCTCATCGTCCCACGAATATGATTCTTTCGCTTCTGGAAAAATAATGCCAAAGTTAA
ACTGCGGAAGAACTGATTGGAAATTATATATGTTTGGATACGACATCATTACACAGTACA
CGTTTTAATGAATATTGTTTAAATTGTTTGATTAAAAGAAAGAACTTCGAGTATAGATTG
TTAGAATAATGGAGAAGAACTACTTATTGATATCATGAAACATTGTGTTTGAGAGATTTT
CGATTAAAAAGAGAAGAACTTATCGATATATAATGACTCTTTACAAAGAGAGAACATAAT
ACTTTTTGCAGGAGAACTTTGTATAAATTCATATAATAGGTAAAGAAATGGTAGACCTCT
CTGTGAACACTTACAACTTGTCGCTCTTTTATAGTGGTTCGTGATAATAAATTATTAATA
ATATCTATTCAAATGAAAACAGGGGTACTTTGAAGTTCTTATTTGATTCGTTCTTCCAAC
AATAAAATTGATG
>cap3_Contig611
GGAACATTTCGCTCATGAATTCTTGACAAATTTTCTTGAAAAAGAGGGCTTTAAAGTAGA
GAGAAAGACTCCCCTCGAAACATCATTTGTGGCAAAGTACGGGGATGCATCTGGATTAAA
AAATTGGTGTAATCTGCGAGTATGACGCCCTTCCAGGTGTGGGGCATGCTTGTGGCCATA
ATCTTATTGCAGAAGCTGGCATTGGTGCAGCTTTAGGTATCAAAGAAGTCCTCAAGATCC
ACTCTGATATGAAAGCACAACTTATTGTGTACGGGACACCTGCAGAAGAAGGAGGGGGTG
GAAAAGTTAAAATGGTCGAGGAAGGAACATTTGATGAAAGTGATATTTGCATGATGTCCC
ATCCAACTCCATTTGAAATTCCAAGTCCTTTATGGCTCGCAAGATCACAACTGACTTGTA
CATTTAATGGCAGAGCGTCACATGCAGCAGCAGCACCTTGGGAAGGAGTGAATGCATTAG
ATGCGGCTGTTTCGTGTTATAACGGATTAGTATGTTACGGCAGCAAACCAAACCCACTTC
AAGAGTCCATTGTGTTTTCACTGATGGTGGTCAGAAACCAATATCATTCCTGAACGAGCT
GAATTGGATATCTATATTCGGGGGATGACGGATGAAGACATGCTGGATTTACTTGAAAAA
GTGAAGAATTGTGCAAAGGGTGCTGCAACAACAACAGGATGTACTGTTGATTTGAAACAA
GAACAACCGAATTATTCGAATGTAGACGACAAACAAGA
>cap3_Contig612
GGTATATCAAACCAGGTTGAGTTACAGATATCACAGGATGAGGAGGATGAACAACAGGAG
AAACATTGGCGATAATATGTTGATCAACTTTTTGCATCGTTGGTGTGGTCCTCGAAGGCT
TTTTAAGATCAGGGACAGGTGTAATCGTTTCCTTCTCGTCATCCTCGATAATAAAGACAG
GTTGTTTACTACCAACTGGCGTTAAAACAGTTTTTCCTTTAGCCAAACAAGATGAACATG
CCCATTTCCCTGATGGCATTTTATCAAGCTTTGGAGTATGACATTGCATGTGATAGCCCT
TATCACAAGCATCGCAAAATTGAAGTGTATCTGGATCACCGGTGCCATTGCATAGAACAC
ACGCTTTGCAGTCTATACATTGCCAGGAATCATCTGCACGTATTGCTGAACAAGTTCGGG
TGAATAACTTAAACATGATGGATGGGCTTTATACCANAATCTTTACAAATCAATAATTCT
TCGC
>cap3_Contig613
ATTACAAGCAGGCTTGTCAGGTACCGAAAGTCATGTTCGATTTCTCAATATTGCAGCCGA
TATTACTGGGGACAGAATATTGGGGGTTGACCATCATGGGAATGTATTTCTATTTGATAT
CGAAAAGAACAAACTTAGCTTAGTTGTTAATGTCGGAACATCAGCTAGTGCAATCGAGTG
GAATAACTATCGGTATAATGAATTTATCGTGGCTTTAACAAATAATGAGTTAAGATGTTA
TAATGCTCTTACTAAAGATCTTGTTTCTGTAATGAAAGGTCACTCTTCCGGAGTACATTC
AATTTCAGTTCACGGATCAGGTCGATATGCTTTGTCGTCATCATTTTCGAACACAATATT
ATGGGATCTTAATACATTTACTAAAAGGAGAACATTAAATGGTGCACAGGAAGTTGGTGT
TCAAAATGTTTTCTTTCTTCCAAATAGCAACAAAATTATTAGTTGTTTCAAGGATGATAG
TATATTTATATGGGATTGTGAAACCATGAAATG
>cap3_Contig614
CCAGACATCACTGAAAGCAAGCATAACTTCTTCTTTATGTTCTTCGTTATCCAAGGCTAG
AACAATGGTAGCAGTTCCTCTGATTAATTTTCTCAGTTCACCAATAATTTTTTTAACTAT
TGGTCCCATCTTTCCTTTAGCCATAGCTGTGATTTTCTTGATCATCTTAGTGATAAATTC
TTTGTATTCACCAACCAACTTTGTTTTCAAATCAGTAAGTTTTGCAATCCATTGTTTGAC
AACTTCTTGGATTTTTCCCCATACAGTTTCTAAACTGTAAAGACCGTCTTCAATGATTTG
GTCGGATTCGATATCTTGGAAAGAGTTGACGACAGATTCCGACATTTCAGTAAGCAAGGT
TTCAGCTTTTGCAGCAATCTTCTTTTCAATCACAGCTCTGATTTTGTGAAGAGCAGTTTC
GATTTTTGTCTTGATCATTTCCCATGTCTCTTCTTTGCCGATGAGTTTCATTACAAATTC
GATTTTTGCAGCAATTTTCTTCCATTCGAGTTCAACTCGATCCAAAAGTTTTCCTGCAAC
TGACTTCAGAGTTGTAACGAGATCACCCATCACTTTCTTCACTTGAGCAACGATATCGTC
AAGACTACCTGTTAATCCGTAAAGTTCAGCGGCATATTTAATTAACTTTTCAAGTTGTTC
TTTAGCATCAGCTAGGGTCTTCTCTGCTTCTTCAGCTGTGATAATTCCTAACTTCTTGAA
GACATAAATTTGGTGTTGAAGCATTGATAAAAGACCACCAGCTTTCTCTTTAG
>cap3_Contig615
GGCGTTTTGATTTTAAACAAATTTTGATATACAGTAAAAGAGTTGAAAAATAATGTCGTT
ATATCCATCACTTGAAGATATGAAAGTTGATCATATGGCTCAGGCCCAGATCTCCCATTC
ACATCAACAAGCACCTCCACAACAACAGCCAACACATTGCAAGTGCACCTAGTGCACCTG
CACCGACTATGGGCGGATCAGCTCTGTATCCATCACTTGGNACTTCATGGGTATGGAGAT
TTTCACATGAGACTGTCATTAAAGAAATGCCAATGAAGTTGGACAACAAGTTCTGCA
>cap3_Contig616
CTGATGTGTGGTGAAGGTATGGTCGTGAATCTTCATATGTGTTGTAATGTCATTACTTTC
GGTGAGAGGGATCGGGGTGCTCAATTGCTCCGCCGTTGGAGGGGGTTTCATGAGCTCTTC
CACGCAGAGCATAAACAAATCAATGTGTAAATCAAACTGCACTCCACTCTCCTTTAAGAA
CTCTTTGGTAATCTTGTTCATATCCTTTCCAAACAGGTTCCACTTTGCAATGTTGTTGAT
GTACGGGTGCAGCCTTGCGGCCACTAGCCACTCCAAAACTTCCGCTGGCATCCAATCATA
TAGAGGCTTGAGAATTTCTGCTTTCGGTTTTACTTCAATAATTTCTTTCACTTCAGCACA
TCGATAAGAA
>cap3_Contig617
ATCATCTGAAATGACCTTAGTTCTTTCTAAGCCTGCAAAAACTGTGCTCTAAGTTCCATT
GGTAAACCTCTGATGCAGTTGAAGCTCCCATTATGAGCACTTTCCATCTCTTGAGACCAT
TCCGTGTCATAAAAGTTGTAATATTTCTTGAGTCTTCATACAATTCTAGCTGATGATATC
CCATTTTCAGGTCCAGCTTTGAAAAGTATTTTTGATCCATGCATGTACTGACACAATTCA
TCTAGTTTGGGGATTGGATAATTATCCCTCATAATTGCTGTATTAGCAAACCTCATATCT
ATGCACACCCTAATATCACCACTAGGCTTAGGAACTACAACCATTGGTGAAATCCATGTG
ACTTTACCAGGCTCTACATCTTCTATTAGATCCATATCTTCGAACTCTTT
>cap3_Contig618
GGAAAGTCGGGCCTCTAAATCAGTGTGGAAGTTATTTTTTTGGCTTCCTTTTGGTTATCA
TTTTAGTATTAAAAGGGTACCCCCAAGAATTTTTTTTATCAATGCTTAAATTTAAAAACT
GATTTAATAGCTGAATTAGGCTCAAAAATTAGAAATTTGCTGCATGGTCATTGTCAAATT
GACTTATTTATTCTGGTTTGGGATTATTAGTTATGTATAAATTTTTCTTAAACTTTTCTT
CTGTAATACATAAGACAGAACAATAGATGATTGTCAGCATTTATTTATTTATTAAGTGAT
TTTAATTGAACTGAAATTTTTTTCTGTTTATTGATTTTTTAATTTTTTTTAGAATTTATA
ATTAATTGTAGACTCAATTCTTTTGAAAGCGCTCATAGGCTTTCTTTATTTGTTTGTAAG
TTTTCCTGGTGTAATTTTACGTTTAATTTGTGACAT
>cap3_Contig619
GCATTCGCCATGTTCTTCGTCACTAAGTAGTTCTCATTTAGAATCGCCTGGTGTATTATC
AACAACAGCGAGCGTTTGCAGTGATGAAGTTAGTCCTGCAGATATTGCTAGTCGTTTATT
TACATTAAATGGTTATAAAGATTGTGATGTCGCACCACTGCTTGGGAAAATTCACCTTTC
AGTCAACAATGCTGCAGAGAATATCTTCGCTTCTTTACGTTTGAAGGACTTAGTCTTGAT
GATTCACTAAGGCAATTTCTCAAGAAGTTTCCACTGACTGGTGAGACGCAAGAACGTGAA
CGAATTTTAATCCATTTCTCGAAAAGATTTTATGAATGCAATAAAACGCCAGATATGTCT
GAAGATGCTTTGCATACATTGACGTGCGCTCTGATGCTTCTTAACACAGATCTTCATAGA
CACGGAATCACGAATAAGATGTCACTAAACGATTTTATAAATAACCTTTCTGGTCTTTGT
GATGGTAAT
>cap3_Contig620
GTTGACGGATTTTGAGTCGTTTAGCAGCCGTGTTGTCGTTACTACTAAGTAGAGTTGTGG
TTGATGTCGTTGTTGATTCTTGGTTGCTAATAGCATCAAGTAAACGGTCAGTGGTTGCGT
CTTGGATATAGCTCGGATACTTTTGTGCATTCGTCGAGTTGTTTAAATTGCTTAAATGTT
CTACCGTTATATCGACTGGCGAGTGATACTCGGTGACAGATTTATCATCGCTGTAGTCCT
CCCCGTCATCGGTATTGCTGTACTCTTCTTTCACGATGTAGATGTTGGTCGCTTTCCGCT
TACTTCGTTCGTTCATGTAGGGCCGGATCCACTCCATGAACCTGTACTTCTCGTAATCCA
CACTCACCTTGTGCACCTCTTCCATGTCAGCACCGGACATGTGTGCCGTCTTTAATGCAC
CTTTCTTTCGTCCATACTTCGTCCGTAAATTTGTAAATGACGTGTACGCATGCGTTCCAT
CTTTCAAACCACACTCTTCAGCCACTCCGCTCCACGTGGCATTCTTCTCCTCCTTCAGGT
GGAAACCAGGTATGTTTTTATCGTACAGGATTGGATGTTTTTGACGGCGTCTGACAATTT
CATCTCCCCCTCGAGTGTGCTAAACGACGTCGCCATATTGTAATTTTTTTATTTGTGCCT
AAAGAAGGGACATATTCACCAAAAGGGGGAGAAGTCTAGTTTTT
>cap3_Contig621
TGAAAGTGCAACCTCCGCGTCCCTTCTCGTCCAACACAACTGTGCTGACGCAAGCGAAAT
CGACCGCGTCCGCAGCCTCGCCATCTACTAATACTTCGAGTAGTGTTCCATTCAGCCCGT
CCAACTCAAAGTCGACGTCCGGCTCGACACCTCTGCTCACGTCCTTGTCTACAAGTGTGA
CGTCATCAACATTATCAACGACAACGTCAACAACGCAACAATCGACAACCGAGTCTGGTG
GTCTGATTCGCGCTCCACCGCAGATGTGGAGATGCAGTCGAATCATGCACATGCTGCGTG
ATCTCCACCCGACGTTGCTATCAGCTCTCGAAGGGATTGTCGATCAGATGGTGTGGTTTC
GTGAGTGTTGGCACGAAGACGTCTTGAGACAGTTACGACAAGGTCTGGCCAAGTGTTACC
AGGTTGCGTTTGAGCACCGGGGAGATGTGAATGGCGCTCAGATCACACCTCGTACTCTCA
GTTTCGTGAAGAAGCTCGTCAGTACGTTCGGTATCGGATTCGAGAGTGCTTCCAATGTCT
CTCAAACCTTCTCGTCAGCTGCATCCGAATCACTTGCTCGACGTGCTCAAATCACAGCTC
AAGATCCTGTATTCCAGAAGTTGAAAGGACAGTTCAGTGCCGATTTCGATTTTAG
>cap3_Contig622
GGAGACTTCATCATTACCAAGAAAGTAAACAGAGACATTGAGAACACCATGGACACACAT
GCAATATGCTGGATGAGGTTCCTACAAACAGGAGGAAAGACAGGAGATGCCTGGAGGATT
AAGATGTCTATGAAATCACATTATAATGAATCAGCATGCCTATATTCACTTCGTAAAGAC
CATAAAATACCAAAAAACAACACGACAGTCCAGATAATGATGTACTAACAGTTGAAGAAG
TATTAGAAGATGAGGTTGTAAGTGAAGGAGAAAATAGAAAGAATATAGATGGACCACCAA
CATGACCAGTATGTGATGCAACAGAGGGAATCTACCAAAAGGTTCTCATATATAATTAGT
AATATGCTACAAGAAGTAAGCTATGGGTAAACTGTTTAGTAATAGTACT
>cap3_Contig623
GATAAATGCATGTTGACTCAGCCCAGGATTCTGAATATCATTTATACTGTGTCCACATAC
TTTCTCAGATGGACCAAGTGAGCCAGCTATCACACCAAGTGTATTCCAAAGCATATGATG
TTCTGGATCTAACGAGAGAGCTTTCTTGACGATCTCAATACTCTGCGCGATCTTCTTTTC
TCCTTCCTGCCCTTTAATTACCATTCCATGACGAAAAGTGCAGACAGCAAGATCGTTCCA
CAACGTAGCAGCATCTTGACGAAACTTGATCGCCATCATGTAACACTTGGTTGCTATGTC
GATTATCTTCTCCTT
>cap3_Contig624
ATTTCAGAACGTATATCGTTCACCTGTCTCATTTTTGACTCAAGTATTTTTGACTGTCGA
TTCTTTTCACTCAGCAAAGTATTTGCTTCAGACGATTCTTTCTGCTCCATTTCTAAATGC
TGTATCTTTTGTACTAATTCTACATTCTTCTCTCGCAAGAAATGAAGCTCTTCACTGCTG
TGTTGGGAGAGTGTTTCCAGTTCCTCTTCTTTTCGTTTTAGTTTACATTCACAATCTTTC
AGCGACTGTTCGAGATCACGAACTAAAGCAGATGACCCATCATTACTTGAAGAACTCTGA
AGTTTTTTCTTTAGTTTCATATTTTCTTCTTTATAATTATTCAGTTGTTCCTTCCACTTT
TCCACATTCACTGAACTCTCTTGGAGAGCCGCCGTCAGTCTGGCATTGTTGTTTTTCAGT
GTCTGAATTTCTGTCTCCCATTTCTTCGCGTTCGCCGAACTTTGAGCGAGTGCCTTTTTT
AGACGATCTATTTTCGTATTTCATCTGTGACTCGGAAGAACTCGTTGACGATCGATGACT
TCCAGGACGATAGCACGTCATCCTCAAGACTACCTGTGCTATTCGAAGACATACTTTTCA
CTGAGCCATTGG
>cap3_Contig625
TTTAAGTAGAGCATTCATATACTTCAAAGCTTTCAGAATTTTAACAGGAGGAAGATAGGG
ATTTGAATACAATTTAGACACAACTTCGTTCAATCCACCAAACAATTTCCTGGCATCTTT
GGTAGGACTAATAGAATATTGAAACAAAATTAGAACAGAAAACTGGATACAATTTGAATC
TTCAAAAGAATTGTTCCCATATAATCCCTGGATTTCACCAAAAAGAACCTGGTCTTTGGT
AGAGGCTTTCATTCTTTCAAACCATTTTTGCCACAGTCCCCAACATTTGCTATTAAAATT
GGTTAAATCTCTTTCAATAGCATATGACAGTAGATTTATTGCATCTAATACAATGTCGAT
TTCAGGTATAATGTTTTGGTAAAAAATACTGATAGATTAT
>cap3_Contig626
CTTAATGAAAAAAATAACGTATAAAGCAAAAATAAAAATATAAATCTTTTTTTAAAAAAT
CTTACTTGATTAAACGTCCCATTAGCAATAACTTACTATGTTCTTCACAGCTTACTTACT
CTGGCACGGACCAATTATATTGACGTCCTGTCTCATACAAAATTTCCAATTCTTCTTCTA
GTACCCATTCTCCTGCACGTAACAATTCACGGTATTTATCATACAGTTTGAGTGCAGTGT
AGGCATCCTCAGCACTGTCGTGGGTGTCAGCTTGAATCTTGATGTTCAAGAAATGCCATG
CAAGGAACTTCAACGAAACATATCGTTGTTTTGGTAGATGGAACAATTCGACAGTGTCGA
CAACTTGGTCACGGGGGATGACAAGGTTAATGACACGGAAATCTTTCTTCAGCCCGTGAC
CAATAAACAGAACTTTTTGTACGATTAAATAACGTAATTTCTGATAAGACGTTTTCAACG
TTGTTAAA
>cap3_Contig627
CACGGTCATTTAGTCTCATTCGGTGAATTACCGCTTGGACCATTACTAGGACCACCACCG
ATATACTCACCACTCGGCTTCATCAAAGCTGTGTTCGGGTATTCGGGTGATTTCGATTGT
GGGTAGTCTGTCTGTCTGTCGGTCGATTTAAGCGGTAAATAGCGTGGATTTGTGTGTGGT
GGTGAAAAGGCGCTTCTAACATAACCACCGCCGCCTCCATTCTTAAACGAATCGATACGA
TCGGATTGATTTGTTATACTGTTCGAACGGTATGCCGATTTTAAACGATTCTTCGTGTTT
TCGTACGGCACACGAAAATTTGGATCATCTGAAGGTGAAGGGTGTTGTCCTTTTCCGTTA
ACAACACGCTCCATCGCAGCTGCAGCTGAATTGTTTCTGTCTATGATAAAGTTACGTTCA
ATTATACTTCTCTCCATTATATTGCGATGATCGATTAATTGCCGATCAATAATGTTATCT
ACGGAGAAGGGTTTCTTTTTATTATTGTTGCTCTCCCCCTCCGTTGATATAAGAATACCT
GCGTTACTACGATAACCATTCGAGGGAGGAGAGTGTCTCTGATTATGTTGTGATGAAGGT
GAAGAATTATTACTATTCTTCGTAAGTTTTCGATAACGGTTCATTAATTTATCTTG
>cap3_Contig628
CCCTTCCTTCTATAAATTGAGCAAGTCTCCATACCTCCAAACCATACCATCTTTTTCGTC
TAATTTTCATGCCCAATCCAGCTATCTAATCCGTATTTAGAGCTAATTAAGGCTAATAAT
AATCTAAAGCTTCCTATCCACACCTATTAATGGTAATATTCGTAATCAGCATACCTAAAT
TGACAAAAAAATATTGGACCCCAAAGTTACCTGTCATATTGACACTCAGCTCACTGAGCC
GCTCGTCTATTTACACACTTAAAATCATGCAATGATCTTGTAAATCGGAACATTATATAT
TTGGAATAGGTGTGTTTAGTGTGTGCAAAATCTTTTATAACCCATTATCAGAGGTTGAGA
ACTATGCATCCAAAGAGAGGTCAAATTTTATTGGACACATGGTACTCCATGCGTTCATAT
AATGTTAATAATGTAAAAGTAATGTAGATAGCAAAGTTTTCTTACTGTATTAGATTCTTG
TTCTTCAACTTTTGCTAAGAATTTGTTGTACTTGAGATGGAGAGAAGTGA
>cap3_Contig629
TTTACTGTCACCTTCTTCTACTTCATTTTCATCCTCCTCATTCAGCAACGGAAATTTTAG
TACATTCAACAATACATTTGCTGCAGCTGCGGCAGCCGCTGCTGCTGCTGCTGCGCAGGT
TGGCCAAGAAAACGAATGCACACCACGAGAGTTAGAATGGTTTGCAGAACGATTCAAACA
GAGACGTATAAAATTAGGAGTTACACAAGCAGACGTCGGAGGAGCGTTAGCTCATTTAAA
ATACCTGGCGTAGGTTCACTTAGTCAATCAACGATATGTCGGTTTGAATCGCTAACTTTA
GCATAATAACATGATGGCTCTTAAGCCAGTCTTGTCAGCATGG
>cap3_Contig630
GACACGCATATGAACCTCGTGATATTAGAATTATTAACTTAACTCGTCCAAGTAGTAAAA
ATAACTTAATAAATATAACATCAACATATAATTTCCGAGCATGTAATATAAAAATTCAGT
TGTTTTGTATGAAACACAAAGTTCTTCTCTCTCCAACACCAAGAAGAAGAAAATGTTGAT
GACTAATCTTAATAAGACTTAATATTAATAATTTCTTTAAATAGTGGATAAATCATTTGC
ATAAGAAAAATATCATCGTTGTTGTGACTTACACAGCTTGTTTTCAACGACGTTATATTT
TTACGAGTACCTCTACCCTGCTATTAAAGAGCACTTTCCTTAGAAACCAGCATAATTGAT
ATTTCTCTGGTTTGTTGATTTCGGTCCAACGAAACGATGGAGACTAGAGAATTTATTCAG
CAGAACACACGTTCTCATTATTGTCTTGCATCACTTAAACATTAGGTGGTTCAGTGGTGA
CAGTGCTTTCTAAAGGCATCAGATGCTTTATTCTTTAGACAAAAGAGTTTTAAGGACTTT
AGTCTTTCTATCTCTTTAGTTAAGNTATAGTTTTGTGTTCATAAATACTCACACCTATCT
GGCTTAACAAGTGAGAAACCTCTCGCATGTGAATCGTATCGTTTTCGGCTTGGTTTTCAT
TGGTCTGCGATTAGC
>cap3_Contig631
ACACTCTCCACCGTTCATGTATCCCTCCTCCACAGAGAGCTGTACAGTTGGACCAATCTG
CCCACACGCTCCAAGCGCCATTCACTGGACAAGGGGTGGAATTGCAAGTCGTTTTTTCAC
TCAAAAATCCTACACAATCTTTTCCATTGAATTGTGGACGAGGATTGGTGCATTTTCGTT
CACGTGACTTGACACCGCCACCGCAAATCTTGGTGCATGGTGACCAGGCTGACCACGTGG
TTAAACCTCCGTTAATTGGGCATGGTTTAGTTCCACAGGGCATAGCTTCCGCTTTCTTTC
CGGTGCCGCACAATGCAGCGACTTCGCATGTTTGAACTCGTTCGCGTTTCCCCGTTCCAC
AAGAGACCGTGCATTTGGTCCATTCAGACCATGCTGTATATCCACCGTTCGTGTGGCATG
GTGTTGCGCTGCATACCTTTGATTCGATTTCACCACCTTCACCACCTTGACCAATACTTC
CCTCCATTCTTGGGAGCGAGGGCTGTCACATTTACGC
>cap3_Contig632
TTTAAGCATAGTACCTTATAAGTTTATACTTGAAACCCTTTTATTTACACATAAATCGTT
TTCTATAGCTTGAAACATTCTTTTACGTTAAAACACTGATCAAAGTATTTGACATAACTG
ATAGGTAAAACAGGATAGAAAACGTTGAACAGCTGGATTGATTTTCATGAAAAGAAAGAG
AGTCTTGAAATATCATGCTTAAAACGTGTAATGTAAAAAGCCATTATAAATCTTTAATAC
TGATCGTTTCCAGACTAATTTTCAGATGACCTGCACTCTAAAAATAAATCAGTCAAAAAT
ATCATGTTTTGGTCTAAAGTTGTGTTGAAGAATGTTTTAAAAGCTCAATGTATGCAGATT
ATGCACCACATCCAGACATGGCAGCTCCTCCGAGATTTGTGTTGACTGAGAAATCGATTG
TTTTCCCATTCACTTTGACATTGTTGATACAACCAGAGAAATCAGCATAATCGGCAGGTC
TTAGATTAGCTGGCATTCCTCCAAAGTAGAAAGTGGTTCCAGTATTGGCGGCTGTTCCAA
CCGAGTCCGTTGACTGAGTTTCGGAAACTCCATCAACAGTCGCAGTCAGCATTTGACCTT
TCTCACTAGCACAATATCAACGGAATCTCC
>cap3_Contig633
TGTTTTTGGACCCATGTTTTAACATGAGTTAAGTTATAGTCTTGTCCTCTTGGTGAGAAT
TCTTCAAATTTAGACGTCTGTTCGTCTGTCACATATTTATCTCAATAACTGCTCTAATAA
TTTTTCTAATTTTTTGCTAGTTGGTGCCAGATTTTTGGAAAATATTTTGGTTCTTGGATA
AAAAAAAATCTTATTCAATTTATTCAGCAAATTTCTGTCATCGAACTGTCATGAAGCTCT
AACTCAAAATAGAAGCATAATTACAAAGGAGTATTCATATTCTTTGGACATTGTA
>cap3_Contig634
GGAAGACATGCTGGCGAAACGAATTTGTTGAATTTGACAGGTCGTTCCAATTTGAACATA
GCGATGTCGTTGTTTAATTTGTAGGGATCGTATCCTTCATGACGGATAACTCTTTCAACT
TTGATGACTTTTTCGGGTCCTTCGAATTCAGCTCGGTCATGTTCTCCGACGACGATAGAG
AAAGCACCAGAATCTTCCCTTCGGTAAACGCAGTGAGCAGCAGTAACAACCCACTGGGGA
GCGATCAAAGTACCCCCGCACATTGGTTGTCCCCCGAACAACATGAGAATTTGCCATGGC
CAACTGTGTGGTACGGCGGTCTTTCCAGCGACAACACGGGAAACTCCTACGACGTCTGGT
TTTCCACAACCTCCAACATGTGGTGGGTCGGTTTGACCTGGTGCTCTTGTTGGTTTATGG
CAAAGTCCACATGTTTTTTTGCATCTTGCTCTGATTCTGTCTGCCAAGGGACCTACAGTT
TGGCAGAACTGTTTGAAGTAGTCGCATCTCCAATCGATATCTCGACATTCTTCTTGAGCG
ACTAAAGCGCCAATCAAAGCAACAAAAAA
>cap3_Contig635
TGTAAAGTAACTTTCGAAAGCTTCAATTGACCGTTTATTAACTGGAAACAATTCCATAAG
TTTTCCATCAATCTCTGCTTTCTTCAAGTTACTGAGAAGACTGTTGAAATCCTTCTCTTT
AATCCATGTTGTGAATAATGTGTGAGCAAACGTCAACGAGTATCCTTCTTTCACTAAGTG
CTCATTGACAAGTTGACTTAGACATGCAGGTGAGATAAGTCCCTTAGAAATCATCAGGTA
AGTTGCAATGGTGAGACGCTTTCGTTGAATATCGGTGAAACCTTTCATAAACATGAGGAC
TTTGGTCATCTCATCGTCAAGAGATTTCTCCAGATATTTGTACTGTCGAATCATCCGTTC
AAGAACATGCGTGATGTTTTGCATGCTCTCCACCTCAGCCTCTGTCTACAAAAACGCTAA
A
>cap3_Contig636
CTAGTTCAGTGGCTAGTTGGTAAAATAAACAGCCAGCAGACACAGACATTTCTTGATTGA
ATTTGTCTATGTCGTGGACTGCTTCAAATTTCCCCCATTTCTCCATCTGGAACTCGGTTT
CTAGGCGTGATAAAAAGACAGCCTCCTCAACTGACATCTGTTCATTGACAACTGCCATTG
GTAAGATGAAAGATTTGATTCCGTCAATAGCTGCCTGTAAGCCATTAAGTTGCCATTTAT
TGAGCTTCAGTAATTCCGTTTGTAATGATGCTATTGTCTCATCTGACTGACTAAGGGTGA
ATAAGTTCGATGATGCCTCAATACTGACATTGAATCTTTTTGAAAACCAGTCCCTGACAG
GTAACCATTTTTCAGTTTGATACTGAACTAATTTTTCAGGTTCTTCCGATAGAGAGCATA
TAGTATCTGTATGTAAAAACTGTAGTACTTCATTGACCAAATCTAACTTTGATTATTTTG
GTTGGTATTGTCAATGGCTGTATTG
>cap3_Contig637
GTCCTGCTCAGAAAAGAACTTCACTTCTTGAAATGCTTCTGTCTGATGAGATTCGGCATG
AACGAAACGTGATGCTACAGTGTATTAGATACGTCGTGAAAAACGACTTCCTCGAATCGT
AAAGCCGCATCTCAAGTGGAAATACGTACTTCTTACGAATACGTAAACGCC
>cap3_Contig638
CTTCACGATTTCCTGCATTGGTGATAGTTCGCACAAGAGCTTCAATACCTCCAACCTGAT
AGACAACTTGTTTATTTTTGGGATTGTTACATGTCAAGTTTGATAAAATTCCTGCAGCAC
ATGTTACAACATTCAAATCATTTGACGAAAGAAGCTGAACCAATAGTTGCAGTAATCCTT
CCAAACCATCTTGTTTTGTTGCAACATCTGACAAATTTCGAAGAGTCCACAAACAATTCT
AGGACAAGTCTAGTACTTTGGTGAGATAAGTGATTTGCTAATGCTTGCATACCACCAGCC
TCAACAATAGCAGGTTTGTTACTTGAGCACACAGACAATACTTTCAAAACTCGGCATGTA
GTATACAGAAGACTTTTCATAAGTATAACTCCTCATGATTCTGACAAGTTCAGCAGGGCC
ACCAGAAGACCAAAATAATCAA
>cap3_Contig639
TTTTGAAGAAGATATGTAACTCTTATAACTGCTATGTATTGAACAATTTGAACATTGGAA
AATTGCAGTTGGATGGTGACTTCACATTTCAAAGGAGAGAGAAAATCGCAGAATGATATC
TGTTTCTCGAACCTTGTAGGTCTACGAAACATCAAAGACTTCTCCATTCATAAAATTGGA
TGGAACTTTTCCGACCACTTTCCAATTTCAGTGACCATAAATCTAGATTTATATGATTGT
TCAATATACAAAGCTGCAAGCTTAGATATATTATCAGATCCGATTATCCAATCCAACTGA
CGTCCTCGTAAAGTGATTTCCTCAAATGTCGACTGGAAGGATACCATGTTATTGCAAGCC
AAGAGATTGCTATGATGCAGGAGAAAGTAGAGTTATTAATTGCAGATCCAAATGCAAATA
CCCTGCATAAACTCACTGGAAGAAAGTTGTACCGTGCAGCCAAAACGTGTGAATCTAAAT
TAGAAGGTCAGAAGTATGTGTTCAAGAAATAACACCGAGCA
>cap3_Contig640
GATCTTCAGTACGATAACCAAATACCCATTTTTTGCAAGATGCAACCAACTTGTCTGGAA
CCATGTCCGTAACTTCTCACCTTTTTGCCATACCTCACTACCCTCAAGTAATGCAGCTGC
TATCGATAATGAGTCTTCAGTTAACGAGTATTGCATGTTTTTCAAATATGTTAATATTTC
TTCTGCGTGTTCACGTACATTATTTGATGGTGTTTGCACAAATTCTAACCATTTGTTTTC
ACATGACGTTGGGTTCAAAAAATAATTGGAATCTGGAAAAACACGAAGAACAGCGTCAAA
AATACATCAGAGAAATCAACAAGTAAGTATTTCGGGTTCCACGTGTTGTTCCACTCGCGG
AACAATGTTAGTCCTTCCAATAAACCATCTTTACGTTGTTTACTACATATAATAATTCCA
ACAACCTGAAAGTCTACGTTTGTCTGAACAACTAACCCAT
>cap3_Contig641
ATGAAAACGAGCAAGACACAGTCATTCAGCAACTAACAAAATTAGCGGGCTAACCAAGAA
ACGAAGAAAAGATAATGAACGTGACGATGAAAACGACATAGACTTCCATGTAGAAGACCC
ATCGTCGCAAAGGAAAGAAGAAAGTGAAGAAAGTAGCAAGTCATACCAACAAAAACCTGT
TAAACGGAGAAGAAATAACAAATTCATCGACGATGAAGCTAAATGTAGTTCAAATGATAA
AAATGAGGAAGAGGACAATGCGAGTGACATAGATATTGAAGGAAACATACAATGGTGATG
ATGCATCGATGTACCAGCTTATCGACAATGGTCGAAAACATGCACGACATCAATTGATAG
AAGAAAGGTTTAAAAAGTATATATATAAAGATAGAAGAAAACGAAGACGATTATGATGAA
GAAGGAGATTACGAAGATATGAAT
>cap3_Contig642
GGTGTACTTACGACCAGCAGGTTTGTTGGTCGACTACCCGAAAGGTGTGGAGGAGTACAC
CGTGTTTACAGCGTTCTTCTTCGGAGCGATCATGTGCCTCACCTTCTCCTGGTTGTACCA
CACCTGTTCATGTCACTCACCCAAAGCGTCACGCCTGCTGAGCAAGCTCGATTATGCTGG
TATTGCGTTCATGATCATGGGCTCGTTTACCCCGTGTATATATTACGGCTTCTACTGCTT
GTTCTATCCCAAGGTCATCTACCTGGCCAGTGAAATTGTGTTGGGGATATCGAGCATAAT
CCTGGCCCTGTGGGATAAATTTGCAACACCCGGATTCCGAGTGGTCAGAGCAGGAGTTTT
CTTGGCACTGGGCTGTTCGGGGGTTGTCCCCGTGTGTCACATGTTGATCATCTACGGTGT
ACAGCGCGGGTCACAACGAGGGGGGCGGTGGGCTGGCTCATTGTGATGGGACTGTGCTAC
ATCATCGGTGCAATCCTTTACGCTCTACGAGTTCCAGAACGCTTCTTCCCAGGAAGGTGA
CTAATTATTT
>cap3_Contig643
GTGACGAGTACATGTTTTTTATAAGCATAAAACGTTTAAGTATATTCAGGCTCAGGTATG
CTTAAAAAGTAAGCATATCAGACAACCATAATCTATGCTATTCACATGTTCTTAAATCAA
ACCTTTTCGAAATATATACTAAAATAGGCATATCAATAGCCTCCTTCGTTTGAGATTTTG
ATAAAGTATAAGAGAGCCCGATCTCCAAAATAAATATGCTTATAAAGAAAATAGATTGTG
CAAAAAGAACGCATATACGCAAATACGAAACAATATGAATCAGTTCTGAAAACCTACATG
GCCGTATTTAGAGACAGCCATTGCTACTGTCACGTTTGAACACGTGTTCGGAATTTCAGT
TTGCCAAACATATCAATCCGTCTAGTTTGAAAGCTAATTAACCTAACTTTTAGTTACTAG
TAAATTAAGTAACTAGGTATT
>cap3_Contig644
AGCTAAGGATGTAGTCGGAAGATCTTCTAGTAGGTTACAATATATGTCAGTATTGAAACA
TAGCCTGCGAATAGGGTCTGTTATTTTGTAAAATAAAATTTACATAGATGTTTAAACGGA
GCATGCGTGGATTCAAGTAAAGTTTGTGATTTCATCGACGATTGTGGAGACTTTTTCCGA
TGAAGATCCGAACGGGGTGTGTTCCGGGTATGTCGGATGTAACTTCGATAATGGACAGTG
TCAATTCTTCCAGAACGATACGGATGATTTTGATTGGGAAGTGAATATCGGAGAGACGCC
ATCATCTAATACCGGACCAACTCACGACCATACCTTCTTTACATCAGATGGAATATACAT
GTATGTAGAAGCAAGTCAACGCAAGGAGGTGACAAAACNCAAATGTCATCCTTCAACCTG
TCCCACACCTCCACGTGTGAGATGATGTTCTTCTACTCGATGAAAGGGCTTGGAGAGGGC
GCATTGAACGTCTACTCCAGGCTCGCCTCTACATCTTTGAATAAGCTTGAGTGGAGTGCT
GGGAAGACCACGGTATCAAATGGACAAAAAGCACAAGTAGATTTGTCTCATCTTGCTGGA
CAA
>cap3_Contig645
GGCGGACCATCGATGGGCGAGTTATTATTGCTCTTTCCTTTCTCGACGACTTTCGAGAGA
TTTTTTGCGATGTTATCGAGATTGAACGATTTCGCTGCTCTCGTTGATTTCTGTATCGGC
GATTCCAACTTGTTTGAAGTCGGGCTACTTCGTATCGCGGAAACGTGGTGATCAGGCCGC
GTAGAAGACGTCATATCTAAACGCGATGGTGGTGGTGGACCTTTGTGATCCGGCCTCGGC
GGCAGGGGATCTCGGAAACCTGGCGGGGCTCTTTTGCAGTTCATAGCTTCAGACTTCACG
TTTGAAATCAAAAGTGGTTCATCACTTCTTGGATCGTGGTGATAAGGTAATTTCGATTTC
CCTAAATTGCCATGATGCGTCGGCGCTGGCGGCAGTGGTTGTTTCCTTTGGCGTCGTTCA
TCTTCAAAATGTCTCGAAGGTGGTTTCTCATGAAAAGGAGGAGGAATCACTTTCTCCGAT
CGAGATGGCGGTAAGTTCTTACTGGCCGTCGGCGGCGGACCACCACGACTCTGCGGTGGT
CCGACTGCTGCAGACGAGTGGATATTCGAAA
>cap3_Contig646
GCTAGAATACTGTTCAAACTGAAACCACTAGGTGAGACTTGAGATGCATCAAATACTAAT
CTGCAAGGTGTGCTCATAGAGTTAGGATTCCAAACTGCACGCCAAGGGATAAAGTACTGC
AACCCACTGTCAAAAATCTGCTTTCTCTGTTCCTCAGTTAGATTTTCTATCTTCTGAACG
AAACCTAACTTCTGCATCTTGCTCTCTGATTCAATTACTTCTGCTCTGTCCCTAGGATTC
TTATCCAAATTTCTAACCTGAGCCTTGTACACTGACATAGCTGTCTGCTTGTTAGTCACC
AATGTAGCTAACGGATTCTCTAGAAAAGGCAAAGTTGCTATTGTAAGTCCCTTCTCTGGA
TCTACAATGACACTCCTATCGATCATATCTTGCTCAACTTCCTCTTGAATACTGATACAT
TGCTACTTCTTCTACTTCTTTTG
>cap3_Contig647
GTAAATTGATCGTGGTCAGTGTAAACAAGGATCACAGCCACACCCTGAACCAGGAATTAT
TCAAGCATTTGCCCAAACAACGTAAATTGTCGCAAGAGCAGGAATCAGTTGTGAAGAATT
ATCTTGCGGTTGGTGCTAACAAAAAGATAATTCAGGAGAAAATGATGAAAGAAACATCGA
AAAGGATTATTCTGAAAGATATACATAATATCCATCAAAAAATGAACTCATCTCAATCAG
ATCTGAGTGAGTTAGATCAAATGGTCTCCAAGTTAAGAAATACCTACACTGTGAAGTGAA
TTTACTTGGCGATGAAGATAATAACTTTCTTGGATTTGTTTTTCCAAGACCAAGAAATGC
AAGTTACCAAGTTACCCGGAGATCACCTGTTTGGACGCTACCTACAAGCT
>cap3_Contig648
GCTATGCTCATTTTGAGAAAAGGTATCTAGTGTCAATTGATTTAACGGAATTCCACAATT
AATCTGTAAAGCCAGCCAGATAAACAGATACATAAAACTTGTGCAACACCTGATGCCAGG
CAAGAAATTCCAATTATGAAAAGATGATCGACCAAATATGTTTCTAAAGACCGGTAACAT
CCGTAACTTGTGGGTTTAAGGTCATTTCGCCAGATATTTGATGGATGAGTCCGTTTACCA
CATTTGTTTGATGGTGAAATGCAACAAGAATCTGGCACAGATGTACCAGTCATATTACTT
TGAAACCAACTAGATTTTTCCCAACTTTTGTAATCAACATCCCCACAACACTTGTAAGAA
GTTTGAAGAAAATCAATGGCCTTGGTCTTTTTATCATTGTCTTTCACACCGTAACTTGTT
GCAATAGTAACATTCAAGCTTCTCTGTACTTCGACTTCAACGTCACCACGATAAACATAT
GCTATGATTCCACCAACAAGTTCAATCAAACAGACAATTAATATCATCAAAAAGAAACCA
AGAACCATG
>cap3_Contig649
CAAGATGCAGACTCGAGTCCGAAAGTACCTCGGGAATCGAATCCGGAATCTGGATCGGAT
GAAACGAGCAGACCGGATCAACCTGCTGAAAGCTCATAAAATCGGAGGCACCAGAGGAAG
TTGCGAATGCTGATTCATCGAGTGATGTTCCCTCTGAAGAAGTGAGTACTCTTAAAACCA
TGGCTGAATCGATTACAAAAATTGCTTGTGATTCAACGGAAGGTACTGCTGCTGAAGTTA
ATACTGAGAGCGTCGAAGCTGAAGTTGAGGCTGATTCAACGAATGTTGCGCCGGAAGTTG
ATGCTGAAAGAGTTGAAGTCGTAGCTGATTCAACGAATGTTGCGCCGGAAGTTGATACTG
TAAACGTTGAAGCTGCAGCTGATTCAACGAATGTTGCGCCGGAAGTCGATGTTGCAGAGG
TTGAGGTTGTCGTGAGTTCGTCGGAGGAAGTTGTTGAGTCGACCCTTAGTAACG
>cap3_Contig650
GTTACCCGGAGCGACTGTTTCATGGTGAGACGAACTTCGCGTCGATTACAGAGAAGGCTG
AAAGTCTGTGTAATATTCTGTTGAAGTGTCAAGGGAACGAACGGATCGTGTTCGAAGTTG
CTGTGCTCGGGCTGACAGTGCCAAGGTTTCCAGCTGCCACTAATATGGAAGAGGTGAAGT
TATCGTATTTGGAGATGGCGTTGTACCAGAAGCTCACCAATATCATCGTCACGGACGAGC
GGTTGGCGTTTATTCGTTTCCAAGCGAGGAAGCTGCTGTCGAATCCCATGAGTCGTGGCG
ATGCCGTCCTCCCCCTGATCATCGTGACGTACGTCTTCGAAGTTCTGTGTCGGGAACATG
TTTCGTCGAACGTGTTGCGGGGAAAGAACTTGCGCATTATGAATCCTGATTCCATCTCAG
CTGAAGACAATCTGC
>cap3_Contig651
GGGGGGATCATTAGAATAAATCACATGATAAAATTATAAATTTTACACTAATCAATATAA
ATTACTAAAAATTATAAAATAAAGTTTGAAAAACTGATATGATCATTTAAAAGTGTTAAA
AAATTCTATCAATAAAAACGCAACTTTTCTTGGCCTTTCAAGCACGATAGCATGTCCAAC
ATTTTCCAGTCTTTCAACTTTGAGAGAGCAAGTTACCTTTTCCTCAATCATGTCTAAGCA
CTCAATAGGTATGATCTCATCTTCTTTGCCCCAGATGGCAAAAGCTGGAACTTGTATTTT
AGAAATATTTTCTTCCAAGTAGCATATCGAGTGAGGCTCAACTAAAGCATACAAAAGCTT
CTTCGAAAAAATTTCTCCTTTTCTAACCTTAGTTGCAATAAACCAGATATAATCCAAGAT
GGCATTTCATATTGTTTATGTGATGTCTTGCAGACAAGTTCTCGGAATTCGTCTAGTAGT
TTTCGGCATGAGGACATGTTTGTTTGATCTTTTTGCTTCTTTTGATCGTTGTCTCCAAAC
TTTTATAACCTTATACCAGCTGGACTACATCATTGTGACAGAT
>cap3_Contig652
GTTGATGGCGTTGAACGGAGGATGGCGCCTCTGTCACACGACATCTGTGGTGTTTTACTC
CCTCACGATTATTATGGATCGCACTTAGACGCTCAAGGGAGAACAACCGATGAGGAACTT
GAGAAGACAAATTTCTTCCACGCAGCCGAAAGTCTTGCAGATATTTGGTCCCAAACTGTG
ATTGATGGGCATAAAGTCGATGCCAAAGCGGTGCCCGTTAATCAAACTTTTGTTGCGCCC
GCACCAGATCCATCATGGGTGTCCAAGCACGTACAACAGAGCCGTTACGCGATCCAAATA
GTTAAATGCCACGATCGAAACTGCTGCAAACCGTTCAAAACAAATTGGAAGAATGTATTC
CCAGAGAGATTTGTCCCTGTTCCTGCAGTGAACGAATATGGAATCAGAGGCCTCCAAGCA
GTGGAGCCAGCCGTGGTCGTGAAAAATCCACGCAAGTATTNTTTGCACATTGCAGCAG
>cap3_Contig653
TAAAAAGTCATCAAATTAAGGACAATCCAGTGAGAAGTGTAATATTTTTCCTTTTAAAAC
TAACATTTAAGCAAACATATTGTCAGCAATAAATCATTGTAAGTATCTGGACAGTTCATC
AAAATCGTCCATTGTACAGCTTACAACTCTCTATTTGTTTACTTTGCTGGCGTTGGCGTC
TCTTTTTGCAGTATTTGTTGTATAGTTATCTTGTTTCAAGATTGCTTCCTATTCAGTTGC
GGGAGAGTACGCTTAAAATCTACTATAAAAAACTCAGACAGTTTAAAATAAAAGAAAGCC
TACATAAGCGAAAATGGTATCAATTTTTGGGGATTTAATGTTCAATATCGACAATGGATA
TTTGGAAGGATTAGTACGTGGATTCAGATCGGGTATTTTAAACAGAGGAGATTACTTAAA
TCTCATTCAATGTGAAACATTGGAAGATTTGAAACTTCATTTGCAAAGTACCGATTATGG
AAACTTTCTTGCTAACGAAGCAGGTCCACTGGCTGTGTCTGTTATTGTGGAAAAGTCAGG
GAGAAGTTAGTTATTGAGTTTGAAGCTATATTCGAAATCAAGC
>cap3_Contig654
GGTGTGGTTGATTACAGAATGGACGGCCAAGAAATATTTCTTACATGTCAAATTAACTGT
ACCTGATTTGTATCCATCTCAGTCTGTTGTTATAGAATTTAAAGGATCAAATTTTCCGAA
AATCTTAGAATATCATTTTGTTGCTCAAGCTCAAGAAATTGCTAGACAATGTGTCCAACC
TCCATTAAGGAAAGACCCAAAAGCTCAACCCTTTGAAGTTAAACCATCTTTATATGCTGT
TTTAGAGTACCTATCTGCTCTTTGTATCCATACCTTTCCAGTTGAGACCTGTCCTTGCTG
TTTAAAGGCTGCTCTAGCCGACGAACCAGAAGAATGTGAAACAAATCCTAATGCTGATAT
GTTTGTTGAATGGGTTTATTGTAAACATGTGTATCATCATGCATGTCTTGATATCTATAT
GAAAACGCCTCCTTTTGATGGAGGTAAAAAATGTCCCAAGTGTGATAAGAGAATTTATCA
TGAAAAGTGGAATATATCCCCTTATTTAGCAGAACAAAGATGGGCACAGAAAGAAGCACG
TCAAAGGGAAATTGAGGAAGTGACCGAATTCTTGGATTTGATGTGATAATGAATTATGTT
AGCAATATATACAATTAGAATATTTTGATAAATGTATACTAAACAATTTTATTTATTATT
CTGTTTTTATCTATNTGAAT
>cap3_Contig655
AAAGATAAACAAGTCTTGCACTCTCAGCAAGTACCCAGAATCACTTGCAAATCATTTATC
TAATTATATGCAGGATCCAATTCATGTGCGAATAAATATAGGTGACCTAACATTGAAAGG
AGTGAAACAGTATGTATCAAAACTATGTTTCATCCTTTCCCTGTTAAAGCTTTCGAAGAG
AAATGTGTACGATTACTAGAGATCATAAAAAACCTGCCTTTTCAGCAATGTATGGTTTAC
TCAAATTTTCAAAGTAGAGCTGAAAATCTCAGTAAAAGATTATGTAAAGAAGGTTGGCCT
TGTACTTTCATTTCAGGTAGTCAAGTTCAGGCTGCTAGAGTACGAGCTATGGACCAATTA
AAAAAGTATAACTGTAGAGTACTTATAACAACTGATTTAACAGCAAGAGGAATCGATTGT
GATAAAGTTGACTTAGTTATTAATCTTGATCTACCATGGGAGACTGAAACTTACATTCAT
CGTGTAGGTCGGGCTGGACGTTTCGGGTCATTTGGTGTTGCAATTTCTATTGTGTCAGAG
GGAGAAGAGGTAAAAAAAAATTGAAAGTATAAGTAAAGAGGTAAAAAAGAAATATTTCAT
CTTCCTGTAGATCTCAAAGAGGTTTGGTTGCAAAATATAAATCATAATGAAATTGTTGAA
GAACTTCTAGACTCTTTGATTGATAAGGTATGTAAAACACACAAGAATGATGAATCACAT
CCCATATCTTCTATGATACCAATGATATGAACATGGGAAAGATATAGACCAAAGAAGATG
CAAACTCA
>cap3_Contig656
CTGGGCAGTCCACAATACGATCCATCACACTCAAACAGTTCAGCTCGTTTGAACAATTCA
ATATGCTCGAGGGGCTGGAGACGAGTTGCATCCATCGGTTGGACCCAAATCCCCGAATCC
TGCCGTTGTATTGTTCCATTGGCATGGTGAAACGTTCGCAAGGTATGCTGCAGCCATAAC
CGTTTCGGGGTAATCGGATTGCGTGCGGAGTATGGTGGCGAGGATCCAGACAGTACGAAG
AGGACTGGCACTAGACAGCATGCACCAATGAACACTAAGAACGTCTTCATATTGTACGAG
TTGTGATAGATGCACATCAAGTGGTCATCACAACTGCTACACTGAACGCTGAGAGGAGTG
CAATCACCAACT
>cap3_Contig657
CGGTTTACTACTGCTATTCACATTATCTCCCTTATTATTATCACCACCATCATCTCCCTT
ATCCTCATTGGAATCATCTCGACAAATCTCCGTTTCGTCAAAATCCAAATCGAGTGATTC
TATCGAGGAGTCGAGTAGAGTATCTGATTTTGAACGAATGTCTTTATGCGTTCCCTCGAT
ATGTTTTTTTAAATGATGTTTTCGTGCAAACCTCTTTTCGCAATGGTCGCACGGGAACGG
CTTCTCACCCGAGTGAATCAATAAGTGTTTCTGGAGGTTCTGTTTCCTCGTAAACGTCTT
TTCGCATTCCGTACACGAGAAGGATTTGAGTCCATTATTCTGCGATTTACGTGACTTTTT
ACGCGACACTTTTGCATCGCCATTCGTAAAGGCGTCTATGTCTAAACAATCTAATGATGT
CATTATATTTGGATTATCAATCAGTAATTCATCCATTTTTCCCATTCTCATTAACAACAG
GGATTAAAAGAATTCTTCGCTCTTCACAATCATGGCTACCATTTTTAATATTACGATTTG
TAGTGACGTCATCGTCATCCATTTGAGTGATTTCGACCTCACTATTCTTGCCCATCGAAC
ACTTACAGTTTGATGAGAAAAAGGAAAATAAGATTCGCCTCAGACTCCCAAGAGCAATTT
GTATTGATCAGGTACGAATCCATCTTACGTTTCT
>cap3_Contig658
AAATATATCAACAATCAACACAGCAGACAAGACTGGTTGGACAAATTAAAAAAGCGTGTG
TAAATCAAAACCGAAGATTCGACATTTGATTCCAACCAAAAATCATGATCAGTAATTACG
ATTGATCTTCTAACGTCACGGCACCGATTACTTTTCTACGGCACCGATTATTTAAGTTCT
TTCAAACAAAACGCCAACAACTCATTTCAGGATTTTGTTCGGTGCGTGATCGATTGATCA
TGACGTCAAAATTCTTTATTATATTTCCTCGTTCCTAGTCTTCTAGCGGCGTCTTCTATC
ACGTGATCTGGAACGGTGAGGGGAACGAGGAGGCGAGAACGATTTTCGGTCACGACTTCG
AGAACGTGGCGATCTGGATCGTTCTCGTCGCCGTCTTCGTCCGCGATCGTAATCACGATC
ATAATCGTTGCCGCCGTGACGCGGTCTCGCACCAGGTCTTTTTGTACTAATTGTCCTTCA
AGACCTTGTAAGCAGTCTTGTAATGATTGAACGAGAACTTGAGCAGGTTCCGTATTCGCA
GTTGTCGATTGTTTGATGAGTGAAATCGCTGTGACGAGCGTCTCGATACCGCTTTCGAAC
TCACCAGCGTTCGCATCCGTCATGGCACGTTGTATCGCAGTACTTGCGACAGCTTGATTT
CGACGCATCGATTCAAT
>cap3_Contig659
CGGATCGCGGATGCGACCGGCAGCAACGAGTACGCCAGCACCAACACCAAGTTGGCAACT
ATGAAAGTCCGTTTCGCGCCGATCCGCGTCGTGAGGTTCGGAATGACGGTAAACTGGGGC
ACGAAATATATCGCGGGGGCGATCATCAAAAGGGTCCCGATTTGTGACGGCGTGAAGCCC
ATCCCCCGGTACGCGGCACTCGTGCTTGTGAGGACGGGGAGGATCTCGTTGTACCCGATG
TCCACCATGGAGAAGAGCGCGTATAAAAATGACGTCATCACCGCTTCTTTTGTGCAGCAG
ATCTGCATGAACTTTGAGTTTTTTGAGTTTTCCGGAAACAACCCCCCGTGGAGGAGTGTT
TCGAGAATTCGATGTCAGAGCTGGTGCTGCTGCCACTTGTGTCATGCGCGTTGACACTTC
CGTATTTTTGGACGTACGCTGACGAAACTAAACTCCGCGTTTCCTCGTCTTTGGCTCCTT
CGGCTCCTTCGTCATCGTTACGC
>cap3_Contig660
ACCGGTTGCCAGCTATCGCGGATCCTCTCCAAGTCTGACAAGCACGTGTTGATGTAGTCC
ATATCCTCCAATAGGTGGTTGGCGAGCTCTAAAATATTATGTATGGTTCGTTCCCATTTG
TTCGAGTTATCGTTGAGTTCGAGCCACTGCGACTCGACATGTTCGAGTTGGACTTGGAGG
TTGGCAGCAGCTCGTGCGACCAGGTTCTCCTCTTGTTTGGCGTAAGAGGGGTCTTCCGTC
TGCGCTTGATTCTTCAACAAGAAGTTGTGTCCGTTCGAAAGGGCCTGCTCGATGACCAAC
TTCCTTGCGTTCAATTTCTCTTTGAACTCTTCATGACTGTCACTTTGTTGCTGTACCGAT
TCGATGTACGGACCAGCAGGCTGTTGCGATTTCAGTTCTTTATCAGCTCGTTCCAACCAG
TCCTTGATGTCTTGCATATCAGACAACAATTGGCGCCATTCGCCTGTGCCGTCGATCCTG
TCTCTGATGTCGACCATATGTAGTCCAAGACTGTTCCATCGATCGTTCATGTCGTCAAGC
TTCGACTGGAGTGCTGTTCTAACGTCGCCCTCTTCGAGTGTCGCCATAATGGCGTTGCTG
GTCGCGTTCAATCGCAAGAACATCTGTTGATGGGTCGATATGTCCGCTTCCAGTTCGTTC
ATTTCTTGTTTGATTCCTTGCATGTCTCCTGAATCTTCTGCATGGCATGCTTCGACGAGC
GAGTCTAATCCAGCCACTCTCGACT
>cap3_Contig661
GGTAAATTTATTTTTATTCTGTATTCTTGTATTCTGCAAACGGTTTTGGTACATTCTTCA
AATCCAAATGATGGCATCATTGATGTGATAAAACATTTAGCGGAAAAGATAAACATCTTG
GAACAAAAACTCGATGAAAGATTCGAAAGAATTGGAAAGATTGGAAAGAAATTCGATGAA
AAAATTGGATAAACTAGAACAAAAGATTGGAAAGAAATTCGATGAAAAATTGGATAAACT
AGAACAAAAGATAAAAAATGATGAAACGAGAATTTAAGTTCGATAACAGAAAAATGTCGT
GGCATGATGCAGAAGCTTCTTGCGTTGCATGGGGAGGGCATCTTGCCACGATCAAATCTC
ACAAAGAAAATGAATTGGTTTATAAGGAAATGGGACAAAGGGGAATCACATTTTATTGGA
TCGGTCTAAACGACATTCGAATGGAGAACCATTATGAATGGGTGAGTGGTGAATCCAGTG
CTTACAGAAACTGGTCTCCAGGTGAGCCAGGTGGAGAACGTGATTATGATTGTGTTTTTG
TGGGTTATGGTGGCACATGGCACGATTATCAGTGCAATTATCGAAGGCCTTTCGTTTGCG
TGAGATGAACACTGAAAAGCAAACTCGGACAATAAGAAGTATAAGTAGAGTAA
>cap3_Contig662
CTTGTTCATCTTCATCATCTTCTGGGGCCTCGTCATCTTCATCTTCATCATCAGCTGCAG
CTTCCTCTTCATCTTCTGCATCCACTTCATCATCTTCGTGATCCACTTCTGGATCTTCTT
CTCCTTGCAATTCTTCATTTTCGGTGACGGTAGTTTCGTCTTGTTTTGGGGCTACAACAT
CTTGAGTTTCGGCGGCTACATCTTGTTCTGCCGGTGCAGCTGGTTCGGCGTTGACTGCAT
CGGCTTTTGCTTTTGTATCGGCGGCTTTTTTCTCGTCAGCGGGAACTCTCTGGTAGATGA
CTTTCTCGTAAGTGACTTCGTGGGTGACGGTTTGGTGGTGGACGGTGCTGCTCCCACCGT
GGTGAACTGTGTGCGAGGTGTGGGAAGCATGGTGCGAAGTCACGTGTCCTCCTCCGCAAG
CGCCACCTGTTGCCTTGTGGCAAACGGCCGGGTGTTTCGAGTTGCAGTTCAAATCGTTCC
ATCGTCCCACGCTGGAATA
>cap3_Contig663
TTGATGATGAACTAAATTATATGGAAGACATGCCAGCGTTTATGGATGATAGTGATGATG
ATGATAGTGATGATGATGATGACTATAATGGTGATGAGATTGTCGGGGAAGAGTTTGTTA
AGGCTGTCAAGGTTGTTGATGTCGTTGATGAAATAGTAGTTGATGAACTAAATAAAGACA
TGCCAGCATTAATGTATGATATGCCATTTGGTCTGTCTAACTGCCCTTCAAGTTTTAGTA
AAATGATGCAGAAAGATCAACATGATTTCCTTGTAGACATGACGCAACAAAGTCTTGCTA
TTGATGATGGTATTTTTAAGGTCAGCCCTAACCACTTTAAACAACATCTTTGTATTCATC
TATAATGATGCAAGAAGGACGTACACATGCATTTCCAATANCTTTAT
>cap3_Contig664
ATTTTGTTTCCATTAGCAACAAAATAAACATTACCAGCATTTCCCTCAAGGTGAGAATTT
TGATACAACATAGCACATCTTTGTTTCGACAGTTAATCATAAACAATGGTCTGTTAATAT
CGTTGAATTCTAAATTTTGATTGGTCGACATTATGATGATATCAATGATATCACTCCAGT
GATAATCAAACTGGATATTAAAATCAATTTATTTTTCGTTATCAATGAAGTAAAGTCTTT
TATGAAAAGAACGTTGTATTTGAGTTGTAATTATTATAACTCAAAATACGAAATTTTAAT
TTTTCTCCATTATATAATCAATACACTACCAATGTGCAATAGCATGTCTTTGTTCGTTCG
TTTTGTAACAACATACTGCTATCATGTCCTCAACATGTATTTTTTCACTGTGTCTTTATC
TACAACTAAGTCACTCAATCGGATAAGATTGAGCGGTTTCTCTAATAATGCATTCTGGTC
GATTTCACGTTTTGTTAATAGAAATGGATAATTGCGACGTATTATTCTGTTGTATTTTAT
TGTGGGATATATAAAGGATAAGTCCTTGGAGTATTGACTTGTACTATAAGAGCTAAACGC
GTGACATAATATTAGGAATGCCAATATCGTCTGTCTTCTCATTGCAAGAGTAATGGGTTT
GCCCTTAGAGAATGGGCGTCCTTAGGCAGAAAGCTGAAGCAGGCGAGTAAAGGAAAGAAC
CTACTGCCATCTAAAGTTCTTCTTCCCTCTCAAATTTGTGCGTATGTATAGTATATATCC
AATCTTCAAAGA
>cap3_Contig665
CTGATCCTAAATGGAAATGCTATACTAAATGGAAATTTGACAACAGATGAGACACGACGA
TAAACAGAAATTTCTTATTTTCCTTCGCCGTCAGCCGACGCCTTCATTTTCTCTTGACGT
TGTCTCTTTTTTTCAAACCACTCGTCACTCTTGTCTCCTTCCATCGCTTCTTTCAAGAGA
GCATCTCCTTTCGGATCAACTTGTGACAAATCTCGGAAACCCAAATCTCCAACAAAACAA
ATTTCATGACCATCCGGGTCGGCAATAATGACCACTTGTACAGTCGCCTTTCCAGGAGTA
TCTAGACTGATGAATGGCGTCAACAACGTCTGTTTGTTGTCGTTCATTTTTCTCTCGATC
GTTTTCAGTTCGTTACTGTCCGAACAGCAAACGCAATCCGGGCGTAAGCTTCTGCACGGT
CGAGTGGTTCTTTGATAGCTTGTAGTTTCAGATGACACTGATCCTTTGCATAACCTAATG
TGACAGATGTGTCTTTCTTCTCGTATATC
>cap3_Contig666
ATAAAACATCTACACTTAACAATACGGAACAGATAAGAACATGTGATTACAAATAATTTA
AAATTTACAGATCTAAAAAAAATCAGCTATCAGCTATTCTCAGTTTTACCTGAAATACCA
GCCTGTATGACAGCCTCGCAAAGTCGAATATTGGATAAATTAAATTCACTACTTTCTGGT
AAGTTCAATTTAATAACAACTTCAGTTAGTTCCGAGTTGAGAGACCTGATAAGTTGTATA
AACTCAGTATGTATTTTGTTGGAAAAAGATTGTATTTCAGAGTTCAACATATCGGATGCT
GCTTCTAAGTCTTTGGATAATTCTATAACTTTTTCGGTAATGTTCGTATATTCTACATCA
AATTTATTTACTGCTATATCGATATCCGATGATAATTCTTCCAATTCGAGTTTCACAGTA
TTTAAAATATTTTCAACTGTTATTGTATTTAAAAACCTTTTGTAAAGCCTTTCGACCCAC
CTTCGATGTAGAATCAAATCTATCAACAAGCATTTGTTCAAAGTAAGATGCAAATTTAAT
ACCATTGACTTGCACTTTAGCACCTTGTTTTAAATGTGTTTCATTTGGATTGTCTTTACT
AGAAGAATAAACAAGCTTTTCACGAGCCATTAACACAGAACCGAATGTATAGTTTACAGT
ACGCATAGTCATCTTTTGGTTTGCCAAGTCTACTTCACTGTGTTCAATCGCATAACACAT
TTTCAGGGAGCCCTAGTAATTGAGTAATTAAATATGGGAAGCTGAAGTGAGAACCAAATA
ATCTAGTTGTCACCAACTTTCCATCTTCTGTTATTCTTCTTTCAATGACATCAATGTGTG
CAACATTTTCATATCATCATTTGGATAC
>cap3_Contig667
AGCACATTGGAAGTAATATTATCTTTAAAGAACACTGAAGCCGCCGTTGTGACAGATGTC
GAGGCAGAATTAGCACCATCACCCGATCCTTTCTCAAAAAGGGTTTTATAAAGTGTTAAC
GATTTGTTGACAGAATCGATTGGTGAAGTCAACGGTTCATTTGTCGTACCGAAAGAAATG
GAAGAAGACGATGCTGTGCTATCAGGAGATAAGCGATTACCAAACAGTGATTTCTTCAAT
CTTTCAAAGGTCGTCATGGCATCATTATCAGTGCGTGTCTCAGACTCACTGTCACTTCCA
CTCACTGTTTTCTTTTCAGCCAGTTTCTGTTTCCTCTTCGCGCGCATCTTGCGCAGACGT
TCACCTTTGATCATCTTCAGCATGAACTCTGTGACAGTCGCGTTGAATGAGTTCATGACG
TCATCACTTGCTTTCCGATCTATACCATCATTAGAAGTGTCTTTTGTTGCATCGTCATCC
GATTGTTTCTCCTGATCGATGTCCGTTTCGGGAACTCGAGTGGATTTGATCCAATCAGGA
ATACTGCTTGTATCATTATCTACCAAATGATATCTAGTTTATGGTACTTCTATTTA
>cap3_Contig668
AGGAAACCTGTCATTGAACTTGCTGAACCAACATTGGTCAATCCAAGTTCACTTGAAAAC
GTGAAGAAAGTGTTACAAAATATTGAAGAACAGTCTTTTACTACTGTTTCAAAACGAAAA
TGGGTCAGTGTAATGTGTGATGGAGTTCCATACACTTTTGCCGCTCAAATGCAAGATACG
ATAAAAAAATGTTCACAATATGTTGTGAATTTATTGAAACTTCTAATATGGATGAACATA
GAGCTATTCATGCTCCCCAAATCGTCTCCTTTTTTCGCCCTTTTCCAAATCTTGTAGTTC
GTCCAGGTCCAGGGCATATTGAAATGAACATGGCCCGTAAATTACTTAGTTTTCTTTGGG
TACCCTTCATGAAAACTATTGCCTTAGAATTGGGATTTCGGACAGAAAAGGCTCAACGCG
TGTTTAGATGTGGTGTTGACCACCATCGTTCAAGACAAGTGCTGGAATCATGCCTGGAAG
CCTTGTCCAAGGAATTGGTACTTCCTTTTATACGTCATTCAATCCAAAACGACGAAGAGC
CACAGCTATAGGATATAATAAAGTGGTATGAATG
>cap3_Contig669
AACAAAATCAAGGGATTTTTGGGAAATTTCTGTCAGAAATCAAAATCAATAATTAAAATA
ATTTTCATTCAATTGTCTATTTGTTAAGGATTGAAATTCCCCCACTGAAAATCTAAAACG
AGGGAGCAGAGGAGCGTAGTGCTACCGCTTTATGCTCATATTGTAAAGCAGCTGTAGTTT
TAGGGTCTCCTCAATGGGGTCGTTGGCAAAACAACAGGAAATTTTGAGATTTAAAGACAT
CTAAATGATTGAAATATTTTCAAACTGAAATTAGTGAATTCTCTGAGGACTGGCATCCCC
TTACAAATTAGCACTATGTGTCCTAACAATATATACTTGAAATAAAAAAAACAAATTTGG
ATAGTTGTACAAAAATTCCCAAACTTTTGCCCTGTTCTTTTGCGGCATTTCACAATATGT
ATGATTGTAAGGTAAAATTAGTAGTAATGT
>cap3_Contig670
ATTGTTCAAGTCATAATATTGCCCTTCGTAAGTCTCACTTCTAACCATGCTCATATCTCC
ATGGTGATTACCGTTCTCTTGTAAAACATATGCCTGCCCGTTCATATCATCCATCATGAC
GACATTTTCCGAGTCTTGATTCATATCGAGAGTTTGGTTGTTTTCATTCTCTTTTTCTTG
CTCATAGATACCAGATGAGTTGCTATAAATTTCGAGACTATCGTCTTCATCAAGTTGACG
CTTTTCTTCGATTTCATCTTGATAATTGTTCATGTCACTGTTGGGTGATCGTCTCTCTTT
ATCGGGTGAGTTAAGAGAAGAGTTTCGGTAATATGGATGCGTCAGTTTGTTTTTATCAGC
ATTTGATCCAGATGCTTCCCCGTCATCATTCTTTTTCTCGGCTTCCGATAGATTTGACGA
CGTATCTTCGTAATCCATTGATTTTTCTTCTTCCTTTGTTCTGGCATCATCAGATGATAT
ACTGGACGATTTGCGATAAATTATGGACTCATCTTCGAGTTGACATCTCTCTTCACTTGT
TAGATTACGTTCCCGGTCAATAATAGTTACACTATTTTCCCCATTACCTTCCTCAAAGAA
CGTTTTTCGCTATCTGCTGAGTTAACTCTCGACCTTTCACCTTGAAGATCATTAGAGCTG
TATTCATTTTCGTTTTCGACATCAGAAATCTTCTCCGATGGTTTGTCTTTATTTTTCGAA
TAATCGTATTTGCTGAAGTCGTTGTTCTTGAGATTATCGTCCATTTTAG
>cap3_Contig671
GATCAATCAACTTTTCGCGTGTCTCCTCGAGCAACTCTTCTCTGATACATTGTCCAAAAC
AAAAACTCTTTATTCGATGACAATTGAAAAATGTCATGCGTTTTTTTTATTGACTCCATC
ATGTTTTTTATCGATTGCTCGTCTTCTGGTTGGCAACTGCTCGCAACTAGAAGACTCAAA
GCGATGTGATGATGCAGAGTTAAAGTACAATGCATTGGGATATTCGGCAGTGATTATGCT
GGCGACGTCCGGAAGAACCCTGGATATATTGCTGGCTCCGTCATAACACTGTCCGACACA
CATCTTCATATCGAGTTTGTATTTATTGTTATGGTGTCCAGAATCAACTCAGCAATATCA
CAACTTTCCAAAGATGGACATTTTATAAACTCCAAGAAGTCCTCACGAATTCTCCACTCT
TGTCAATAAAACGCAGCAATAAGGCTAGCTGCCCCTNATTGCTTGAATCAGACTGCCTCG
TCGGCT
>cap3_Contig672
ATTCCTCTGGGAAATACCCTTACCGATGGTCCGTGGATTTCATTGGGGTTTCGTTCATTG
TATATTAGAAATCGTGCGGCCCGAGGAAAGTATGATATTAATGTCACGTGACCTGATGGA
ACACTTTATATTACAGGATCCGTTTTCTATGCGATGTCATCCGTGGGCTGATCAAATGAT
TGGCGTCTGGGTGACGGATTTAGGTGACAATTATATATTTCGACATGATGATCGACTACA
TCATGCTCCGATTGTCGATCAAATGCCGAAATTGAGAGACGTACGACGAGAAATGCGCCA
AGTATATTGGTATTCACGGCACGTATCCCGCTGACATGCGCCTGTTTTGGAAACAGAAAG
GAACTATTATTATAATTTTACGTCAAATGAAGATCGTATTAAACAATTAGGTGATTTAAC
AACGAACTCCGCTGTATGCGAACTAGTACATTAATTTTAATTATTTGATATTT
>cap3_Contig673
GTGACATGAAATCATTCCATTATACTCAACTTTACCTCCTAATCTTCAACAACGTATTTT
GGAACGGCTCCGCCAAATAAACCAAATGGTGGAATTGGTCGAAAAGTTGTTGTTTCTACA
AACATTGCTGAAACATCATTGACAATTGATGGTGTTGTTTTTGTGATTGATCCTGGATTT
TCAAAACAAAAGGTATACAATCCTAGAATTCGTGTTGAATCATTGCTTGTTTCTGCTATC
TCGAAAGCAAGTGCTCAGCAAAGAGCTGGTCTGCTGGAAGAACTCGCCCTGGAAAATGTT
TTAGGTTATACACCGAAAAAGCTTACAAGTCAGAAATGCNAGATACATATA
>cap3_Contig674
ATTGTACTTTTTGGAGCTTCTTCATCAGTCGGTGTTTTAGTCTTTCCTGTCATTTCGATA
GCATCATCATCCTCAATAATTTCACCTTCTAACTTTGCTAATCCTTCAACTGTAAACGGT
TCCAAATCAAATTCTCTTGGAAATTCAAAATAATCATTAAATTTAACGGCACAATCTCTT
TCCCAATCATACTCAAACCGTTTCAATTGAATTGCTAAAACTTTTGGTAACTTCTTTACG
CACATTCTCTTTACTGTGTCAACTTTCTTGTCACATCTTTCACAGAAATATGCATTGGCA
CCTTCTAAGAGATCTCCTTTCACATACTGTTCCAAACTATCAATCAAAGTATGATGGTTG
CGGACATCAACATTTAAAGCTGTAAATGGTGTTTCACGTGAGTATCTGTGAGGACATTGC
TTACATTATTTTTGAATCAGCAAATGAACCACCAAGTACATCAGCACAAAATGTTTGTGA
CCAGCAGATTTCAAGCCCTCATCAATATTATCAACTAGAGT
>cap3_Contig675
ATTTAATTTGGTTCTGTTTTTCCTTTGTTTTTTCTTTAAATTGATATGAGGATTACTACT
GTAAGTAAGACTACTATTTGGACCGTTGTATGTTTTGCTCTTAGGTGATTGAGCTCTCCT
AAATTCACTTTGATGAACTGAAGATATATGAGGTCTGTTTCTTAATTGGACACCAGTGAT
GCCGTTTTGCACTCTTAGTGGAGTTATGCCATCGTGTCTTGCATCACCAGCTAATGAACC
ATCGGAAACCCTCTCAGCACGAGCTGCAGCTGCTGTTTGGGGTTTAACTTGCGCTTTTTG
TCCAGCAAGCCTAGCATTTTCTGCGTTCTTGATGAATTTAGCTCTTTTCTTATTTTTGAA
TCCAATACCGCCTCCGCCTCCATCCAAACCACCAAGAGCGCCGCTGCCTCCCAACCCCAC
CGCCAA
>cap3_Contig676
GTGACGTTCAAATTTGTCAGTATCTTTTAGACTGACTGGAAATTTCAACATACTGAAGTT
GGGTGCATCGTGTGTTTTCTTTGTAGTTAGCATATGATGCTACTCGCGTTGTGTGTGTAG
TTGGTGTGAAGAGACCAGCTAGAACTGCATACTGGAAGCACTTTTGATCAGTAATTTTGA
CATTGATTATACATGACGTATTTTTTAACCATGAGGCAAGTTCGTGGTATGACGTTCCTC
GGAGCTGATCCAGCTTCCATATGGTCACCTCGAGTGCAACATAATCGGCTATGACCCATC
CACTTCCCACCAGCTGATAGCATTATATTCTGTATATGATTTGCTTTTCAGCTTCAGCTA
GCTTTTCTACCTATACTTGTTGAGCGGTATATTTCGAACTGCTCAGTAACTAACGTTATC
GGTGGGTTTGTCTGGTATTGATGGATCGCTAGCCTGGACGAAGTTC
>cap3_Contig677
AGGTAACAGAGTTAACTGATGACATTACTTAAAACTTTACTTGATATTAAAAAAGAACAT
CAAAAAACATTATACTTTACATGTTTCAAAAGAAAGATGTGTTTCAAAAGAATGACACCA
CAGAGGTTCTTGTATTGACCAAGAGCAAGGTTTATACCTAGTTAATGAAACCATGTCAGG
TGTCCAGCACCCAATACATGTGCAGAAATTGATCATACCTGGAAAAAACCCAATATTATT
TTGTGAATCTAGGAAATGCCAAGATAGTTTTAATGCTCACGGTATAGCAGGTATTGGACA
TTTTGAATGTGATCACTTGCTGTCGACACAATTTTTGAATTACACAATCAATTGAATTAG
ATACATCTGTTCTTGATGAATTAGTTGAATCGTTACGTATATCTGTTGAAAGAAGGTTGC
TTGTAGCCAAGA
>cap3_Contig678
GAAAATAGTGAAGGTGTAGGTTCTAAGAGTGCTGTGAAATCCGCCATGCCGAAGGCTCCG
ACGACACAACCGCCTACTTTACGCGTTATAACGACTCCAAAGACTCGTAATATAACTGAT
AATGGCACATTTATTTTACCATCGACTCAAGACAATGCAAAAGAGTTTTATAATGAACTA
TGGTTTATCATTTTATTAGCAATAATTTTACTTATAATTATAATACTTCTTCTTATATGC
GCCATTTTGAATAAAAGCGGTGGGAAATACCCAGTTGGTGACAAGGAGAAGAAATTCGGA
GGTTGGGATAATCAGCAATTGCAAGATTATTCCGATAACCCAATGGAAAAACCAATGGGT
TACCTTTCAAAGACACTCCGAAACGACATGCGAGCGACAGTTCGATCTCGAAACCGATTA
TCGACGACAACGATGATCCCGACAACGACAGCCTCGATTTCTACGGCGAAGACAATAAGT
TCGAAGAGGACGGTTCTTTTATCGGTGAATATGGAGATGATAAAAAAGTATAACAATGAT
ATTTATTATTCTTAGGTA
>cap3_Contig679
CCAGTCTTTAAAAGTTAGTGGAGTTAATTTTCCCGTCCAGACTCAAAGTCATGCGCTCTA
ACCACCTTTCCAGATTCTGATATCTAACAAAGCTTAATCAAGGTGTTTAATAAGCTACCA
ATAAAAAATATATTTTCCATTATATTAATTTATCATTATCAGTTTTGAAAGTTCTTATTC
TTATTCTTGGATCATATACCTAAAATAAAAAAAATGCACTATGAGGTCTTGATAGTTACT
TCTGTTTCTGGGCACAAAAAGATGTACCAGGTGCGACCAAAAAAAAAACACCCTGTTTAA
AGCAAAACTTGAGAGAAATCGTACATTTACAAGCTGGACAATGTGGTAACCAAATTGGTG
CCAAATTTTGGGAAGTAATCTCAGATGAACATGGTATTGACCCCACTGGTACTTATCATG
GAGATTCAGATCTTCAATTAGAAAG
>cap3_Contig680
AAATTTTTGACGATACCCTTAACCTTTATGATTTTCATATTTTCATATCTTAGGTGAAAA
TCAGGAAAAGCAAAGAAAAGTTTAACAGACAACTCTAGTCCCTGAAGACTAAAGTCCCTT
TATGGGAACAAAAAAGGACCACTTTTTTCCAGATGAAGGACCAAATAGGGACCAAAATAT
TTTTTTAAAAAAGGGACCTCCAGCAGAGTCTGAAAGGAGACAAAAGAGGAAAGATGATAC
CAGCAATTTTAATATATTGCCAATACGGATTGTTTAAAATTGATAAATCTGCTTAGCTAT
ACTGAGGTAATCATCTCATATCACCTGAAATTGAAAATACTGGAAATGATGAAATTACCA
TGCATTTACAGTGCAAATAAAAAAATACAGACAATAATTTTTTTTGGAAATTTATATTTT
TAGAAAGGGATCAAAATGCCTTTTAAAGGACCTTTTTGTCACCACTGCTTAAGTCAGTAG
AAGTTTAGCTTTGCAAAAC
>cap3_Contig681
CGATTCCTTCTGGAAGAATCTTTTCGATCATGGATTCATTTCGGACACCGATCTTCGTGA
GGTGGAGCGCCGAATCTTGCAATATATTGAAAAAGCAGAAAGCATTCATTCGATACCGAT
CGCAGAAGCTCTCATAACGTTTAAATCTCATGATGGGGAATCTTCTCAAGAGTTCATACC
GTTCATCAATGAAGTGCGTCTCGGCTCCAGCGAATCGTGTAAAGAATCAGACACAGCTGA
AAGCGATTCGCTGATCAGCAGTGCCACGTTCTCGCCGAAAGAATCGAATGGCTCCACTGA
ACGCCACAGAGGGGATGCAGTGCCCCTTGTCGCAAGTCCCAGGAACGAGTATTCTGACAC
GCGTGCGCATCACAGAGAGACCCAGGGTGAGCGTGTGAACGAGACTTTAGATCTGGTGGT
GGATTACTGGCCGCTGCAACTCGCACAAGCTGTCCAACATATGAAGAGAGAAGAAAAGAA
AGAGATT
>cap3_Contig682
ATAAAAACGACAAATTAAGAGTATTAAAGGTTTGAAGTTAAAATATACCTTTTCAAGGCA
AAAAAACGTTCGTAAGTGTATACAGACCTGTATTCGTAACGTACTGCACACACTTATAAC
TAAACGCACAACACCAAATTTAAAAATTCTTAACAAATTTTCTCCTTTAAAGTCTGACAT
ATATGTTGACGGAAAGCGTTTAACAAGCGCTTCGAAAAAACTTAATTTTCTTATTGTAAT
AGAAATGAAGCGAACTTCTTCCATTTATTTCGTGCATCCTTATGAAAATTCGACCTTTCC
CTCAACTTTTTAAACATAAATGCCATAGTAGCGTGAAGTCATTTATTTAGATGTTTAGCA
ATTCAAAGATCGAAGGTTGAATAGACAGCAGCGTACTTGTCGAGTCAGCATTAACCAGCG
GGTAGTAATTCGCAAAACTCGACTCTACCAGTACGGGCAGCTTTCCACTTTTTCCGCATT
ATTAAATCCATCAACCCCAAACACACACACACACGAGGTAC
>cap3_Contig683
CTGACATCCATCCTTACTTAAACTACTTCGTAATTATATTTGAAGAAACATTACAAAGAG
AGTATGTCCTCTTTTATGATATACTTTAGATTCTTATTTAATCTTATTTATTTTTTATGT
ATACATTTACACATTGTAAAAGCTATATTACATTTCTGTGTTATTTTGTTTATTAATGTA
TTAGTGTATGGTCATTAAAGCTTTAATTAAAGATAAAATGTTTAAAGCTTTGCTGTCCAT
GGTGTATCTTCTTAATGGGCAAAGGTTTTCAGGGCAACAATGTTATGTGTCTTACTTCCT
TTATTAAAAGATGGACCTGACAATAATATATGATGTATTAATTTATTGAGTACTGCAAAA
AATACCATACCTTTCTTTCTTGATAAATATTGCTGTTTTATGGTTTTGTGTTATTTGAGT
AATTACTTTTTCCTTTCTTGATCAATGGGATTGAGTTCATGG
>cap3_Contig684
ACGATGTAATGGAAGTTTCTGATCCTGAAACTCAAAAGGAGAACGAGGATGGTGATCCGT
CTGCTGCGATTGAGGAATCATCTGTAGTGGAACCTCTTGTCGTAGAGGAATCAACCTCTG
TAGAGGAATCACCTGTAGATAATGATGATGGTAGCTCTAGCGATGAGGTCACTGAAGTTT
GCGATCCGAATGAGAAGACCGGGGAAGAAAAAAGTCCTGCGACAACTTTGATTCCAGAAT
CACCTGAAAAAGACAACTTCTTTGAAAACACAGAAGATAGTTCAGGGGACGAGGTGACCG
AAGTATCTGATCCTGCAGCTGCGGAGAATGAGAATGATAAAGATGGAAACGTTACAGCAG
ATGAATCACCCGCTGTAAATGAATCGTTTGCAACAGTCGAGGATTCGAATGCAATGGACG
GATCACTTTT
>cap3_Contig685
GTTCTCGCGGTCGAAACTCATTGAAGAAGGTACCTCTCAGCCGAGGGCCGAACTGATTGC
TGCCATGTTAAATGCGCACACCGGTGAAGTTGTAAAACGCAGCTTTGGAAAGTATCACTC
AGAGTCAATCAAGTTGGGTGATAACCAAATTGTATTGCATTGGATCAACAACGACCATAA
AGGTTTGAAACAATGGGTGCGCACCCGTGTCATTGAAATCCTGAGATTTACGTTACGAAG
TCAATGGTACTATATTGAAAGCAAAATTGTTAATTGCGGACTTGGGCACGAGAAGGGGTG
CTAAGTTATCCGATGTTGATATGAACTCAGCTTGGATAAATGGTTTCGAATGGATGCATA
AGGAAGCAGCAACGTTCCCGATTTCAAGTGTCAATGATTTGAAGTTAAATGAAGTGGAGC
AAAACCAGTTATCAGAAGGAGTTATTTGCGCCATACCACAAAAAAAGATCTCACAAGTTT
TGAATGGCCCCAACCACGCGCATGTTTAATGACTTCATCATTTCTCCAGAACAAAGATAA
GAATCCTGATCTTAATGACGCTAAAATACGTAAAATCTTGG
>cap3_Contig686
GCCAAGAATGCAAAAAGTATAAAACAATTATAATGATTTGTGTGCACTGAAAACATAACT
AACAACTTAACAAAACAAAAGTAAATAAAAAACAGAACTATAAAGAACTAAATTGTTTTT
ACGAAGTTAACAATGTTTTTTTCTGTTAAGGTAAGTAAAAGTTCATCAAAGGAATTAAAG
CGTCTTTTATTTCTTCCTCATTCATTTTACTTACTTCTGGAATAAGTGACAGAAGTTCAT
TTTTAAATATAGTAGCATCTATTTTTTTGTTGTGCATCTGACATGAAAGTAAACTTAACG
TAGAGTGAATTGTCACAAAACTTTTTTTTTCATAGAGTTTTTTACAATAAACACATTTCA
CAATCTTGCTGCCATCTTCTTGAATCTTTTTATGACAATTTCACGCAGATCAGATATTTG
CCAATGGAATTTTATTTTAAAAATTTCACCT
>cap3_Contig687
TGGAATTTGAAGTAAGGTCTGTTCGAGCTGTCGTCGCAGGGCAGCTTTAGCTGCACTTTG
TTTCTGTTCTGGCGTTTGTTTTGGTGGCGGGGCTGGTTTGGGTGGTTGCGGCGGCTGGTA
ATTAGAATGTGAATTTGGTGTACCTCCATTCGAATATTGATAAATAGGACCACTTCCAGC
GGTACCAGGTGGTGGCGCAGGGACCAATTGATTGCCAATTTGAACGTAATATTTTTGGAC
TGGAGCAGAATTGGCGGCGGGTTGAGCTTGCGATTTGTTGCTCTGGTATTGCTGCTTAGG
TGCTTCTACCTTAGGAGCGATCTGTGCAGGTGGTTTCTGATGCAAACTAGGCACTGGAGG
CTGGTGTTTTGTCGTAGACTTATAACCGTTCTTGCCGCGTTGAGATTCGATTAATTTACG
CAAATATTCAACGTCGCTTCTTCGCATCGCAGATCCTCCTTCAGTTGTTCGATCTTTTCG
AGCTGGCGGGTGATGCGCGAAGCTTTCGTCACTTCAGCGCCGCCATCGAAATCTTTCACC
AAAACACTAATCTTCTGGCACTAACGATTTCACTACTTTGCTAAGT
>cap3_Contig688
ATGACATGTTTAGGCTTAAAGTTAAGGAAGCACTACACATCAATTGGATAAAACCAGAGC
TTAATAAACAGGTAAAGCATTTAGCGAGGTGAAATCATACAGATATGGATATGGATAAAA
GTACAATGGATATACTCGACAAGCTCGACAGACGGTTACAAACTTTCGAATTTAAATCAT
CAACACTTCCATTTTGTGTATGGAACAGGACGTCTGTTGCGAGAAAAATATATAGTCGAG
AGAAATCAAGAATTTATAGAACAAAAGAAGACCAGCTTCTTTACAGAATGGAATTGTGGA
TAAACGCGTGCTATCTGAATGCACCAAAGAGTGGTAAAAATAAAGGACGGTTGTCCTATG
TCGTTGGCCAGTGTAAACCTAAAACAAATATGTTGAAACAGACTGCGAGTTTAGAATCCA
TAGCTATTCCATCTATGATTACATCGTCACACCCAAAAACTATAGAAAATATACAGCTAG
AAAGCGGAACTAAAAG
>cap3_Contig689
GTATCTTGTTCTTTCACCCTTCTTTTTCCTTACAATTTGATAAACTTTCTTTGTTTAGTA
GCATGTCCTCCCTAGTTACGATGTGTTGTTAGCTTAGTTACCAAGGTACTATCAACATTT
TCATTCGGATAGAACTTTTTGTATACAAATTGTTTGACTGTCAGTTTTTTTATATGCGAG
AAGGTTCATGTAATTTTGTTGGTTTTATAGTTAATATTTATTAAATTCGCTTCGTGTAAA
CTCAAAATGATTATCCGTACTCGATTTGAAAATACAAATGACACTGTGTTGAGGTCGAGG
AGTGAAAATTGGTCACTGTTTGTAGTAGCAGATTCGTGTTCGTTAAGAAATATTGTTGAC
GGAGTTTTGACGGGTACTTTATCCCCTAAAGTCGACTTAACGTGGGCAGATGTAGCAGCA
TGTAAATATTTCGTAGCAGTAACCGGTAAAGATTTACCTGAAACTAATGAATTTAGTGAA
GCTTCGAAGGGAAGTTCGCACACAAGATTTATATGAAAAGAAATCGGCGTATTTTCCNGC
GATGTGTCAT
>cap3_Contig690
CAGCGTGTAACGTATTATCTGCAAGGAAAATGTCGACACACAAGCAAGTAGACATATCGG
AAAGAGCAAAGGAAATACCTGAAAGTCTTTGGGTTAAAACTGTTGGCATGGTACTGAAAT
ACAACCCAATAAACCTTGGTCAAGGTTATCCAGATTTCCCCGAGGTTGTCCCAAGAAGTT
TACACGATGCTTTAATTAAGACTCAGAGTGCAACTGCTGATGTTGGTTTAAACCAATATA
CTCGTGGACAGGGACATCCATCATTATGTACAGCTATTTCTGATGTCTATGGCCCATTAT
TTGGTAGAGAAATTGACCCTATGAAAGAGATTATAATGACTGTTGGGGGCTATGAAGCAT
TACACTGTGTCATTTATGCAGTTACAAACCCAGGGGATGAAGTGATTATGATTGAACCAT
TTTTTGATAGTTATTCAGAAACAGTAAGAACTTGTGGTGGTGTTGCTAAATTTATTCCTT
TAAAACTCAGAGAAGGAGGCACTAAGTCATCGGATTTTTATCTTGATCGTGATGAATTGA
TCAAGATGTTCAGTGACAAGACAAAAGCAATTATTGTGAACACTCCACACAACCCTACTG
GCAAGGTGTTTACACATGAAGAGATAGAATTTATTGCTGATTTGTGTAAGAAGCATAATT
CATTATACATCAGTGACGAAGTATATGAATGGCTTGTGTATGATGATAACAAACATATAC
GCGCAGCAACTCTTCCAGACATGTGGACCGCACTGTCACAATCTGTAGTG
>cap3_Contig691
CTTCAACATGGTTTCCAGTCCTTGAAGGCGTCAATGTTATGTTGGAAATGTCTGAAGCAA
TTCAACAGAAATTTGGTGAATTAATTGTACACAATCAAGAATATTCTTTTCGGCATAATT
TTGAGAATTTTCTCTGGAAGTTGGCGTTTTACAGTATCATTGCTAAATTCAGAGCTTTTC
TTGAAGATCAGGATGTTCCTCACTCAGCTATGCAAAAGATCGGTATTTTGTACTGGGATT
TCTTGCAGAACGGGATTCAATTTCTCGATTCAATCATAGTGCAGTTACAAAAACAAGCAC
ATTTCGATCTCAATGATTATCTGAAAGATCCAATAAAGATTGGAAGTTGTAATAAACAGG
TCAAGTATGCATTGCGTAGCTGTCATCTTCTTCTGATCTTCATGGGTGACTTGGAGAGGT
ATGTTTCACAGTTTCTACAGCAAGAAGATTACCGAAATGCTAAACGATATTACCAAGAT
>cap3_Contig692
GTTTCATTGGGGGTGCCAAGCATTCTAAATATTTTGAAAAGTTGATCGATTTCAGAATCA
CCAGGAAAAAGAGCAGTACGTGTCAACATTTCGACGAATATACACCCGATGCTCCAGATA
TCAACCGACGTAGAATATATTTTACAGCCAAGTAAGATTTCAGGAGCTCTGTACCATAGC
GTCACGACTTCATGCGTGTAACAACGAACAGGTAAACCAAAGGCACGAGCCAATCCAAAA
TCAGCTAGTTTGATATTTCCTTCGGTGTCAATGAGTAAATTCTGTGGTTTCAAATCACGA
TGTAGAACCCGATGAGAATGACAGTATGCAATCCCACTTAACAGTTGATACAAGTAACTC
TTAACTAAAGCAACATCAACTGTTTTACAAGTGTCCATATACTTCTTCAGATCTTGATTC
AGGTATTCAAAAACAAGAAATAATCGAGTGTGACTGTGAATAACATCTAGTAATTGGACT
ATATTTGGATGCGTCAATTCACGTAAAAAGAGCAATTTCTCTGATAGCTGTACTTAGGTA
ACTACCTTCTGTATCAGTGTCTAAATCGAATTTTCTTGAGTGCTATTACTCTTTCCAGTT
TGTCGATCTTTTGCTTTGTAAACAACGCCATACGTCCCTTCTCCAATTTTTTC
>cap3_Contig693
GGATACCCTGTAGAGACCTCACAGCAAGGAACCAAAACGCAGAATATGACAGTGTTTACA
AACCTTCACCACATGCATTCGTATATTACAATCCATCATATGGATATAAAATCCTCAGAG
AGTACTATAAGACATGGTTCAAACCAACGTGTGCGTTTTCTGTGTCTCATCCTTTCCCCT
TACAGCTGATTCCGTCGGCACACACGCGTTTTTCTTTGCGCCATTTGCCCCACACTTCGT
CGAATACGTAAAGAGCGTTACATTGGGCGTTAACAGCGAACATATAACGTGCGCCCGGAA
CATCTACGCCGCAACAAGAATCGAAGTTTATATAGTAGTGGAACGGACTTGTGTCATTTA
CACATTGCGGAGGACCATTCAATCGATGGGGTCGCCTGAAGAATGGCCTTCGAGAGAATG
TCTTACCCCAAACAACTTCACAACTTTTGAAGCGGTATCCAAAATATTCTCCACCCTGCG
TCCAGAACCAATACTGTGCTGATCCCGTGTTCCCTTCTTTACACAGATACTTTCTGTACA
TGGAGCATGGAACTTTGACTTGATAAATGATCGTTCCAATGATGCTCAGCCCAATGAGCA
TTGCGACTGCAAACATCACGAAACACTTTCTCGATCGCACAGTGTTGAACCGTATGGAGT
GTTTGAGGGAGGTTTCCAGAGCTGACAGCTGTCGTACACAAAGGTCCTGCCCTGCACTAC
CGATGATGGAAACCAGAGCTTGCACTTCGTTCAACTCATCTTTCTCAGCATCCACTCGTT
CGAATGCGTACCCGATGTGTGCCTTCATTTCACCGGAACCGTATTGCTTTCTCAGAGACT
GCTAGTCCGGGATCGTTGTGACGCAT
>cap3_Contig694
AGGAAGAGAAAATTGAAAATGTAAAAAACGCAAATGATAAAGTTAAGACTCGTTTCTATT
TTCTGTGTGATTCAAATGGAACATGGGTAAATGATAAAACTGGTGCTCATGGTGGATCAA
GGGCACCACAACCTTTGGTATCATTTGATGACCAAAAATGTCAGCTAACTTTAAAATTCA
ACTACACTGGAGCATGTTGGAAACCAGGTCCAAGTGATTCAATTGTGAAGGATATTAGCT
TGGGAACATTTGCAATCATTTTATTTTCCCCTGGTGTGCTTTTGTACTTTCTGATGGGAG
TACTATACAACAGATCACGTGGAATTGAAGGTGCAGACGCCATTCCACATCGACAAATTT
TAGAAGATTTACCAGAGCTCATACTGGATGGATTTATGTTCACTGTTTCTATGGTAACTT
GTAGTCATGAAGACAGATATGCTCGTGACTACGAAGAAGTCTCTGGTACCGGTTAAATAG
ACTAT
>cap3_Contig695
AGTTTGTGTGTGAAATTTCTCAAAACATCTTATATCAATATTGTTTGGCAGTGTTATGGT
TTGCTATAATTGCTGGCATCATCATATCTCTCTTTGGCCTTATACATTGTCTGCTTATGT
ATCTGATTGATTTTGCCGGATTAAGATTTCAAAAAGATGACGTTGACTTCTCAAATCTAC
ATATTCGTGATCGAGAATTGATGGCCTATATCCACGAAAAAGATAAACAGACTTTCGTTG
AGTGTGTTCAAATGCTGCCTAAAAATTCCGATAATCCACCAAAAAAAGGCGTATAACACC
CTTGAGTGATATCTATTTGCGCATTAGTGATTGGGTATGAAGTACCATATCGACACAACA
GAAATTTTTAATGTAGCCGATATTTGGTTGCATACACTTTAGCCTGCACGATACTTGTTC
GATATGAATTCGTTTAAAACTTGAAATTTTATATTCCTTTTATGACGCAAAACTGACTTG
ACTTTGTTGTTTCGATTTCAAGTTTATTTAATTTCAGTTATAG
>cap3_Contig696
GCTTCATACGATCCAGCTAATTTTGCATATGCTTTTTCTAGAAGAGCACTCCAAAATTCA
TGTCGATCTTTGGATTTCGAATAAACCAACTCATTGTCAATTGTCGGTAATCTATCATCA
ACAACCACTTCAACCCATTCACCAAATCGCCAAAATCGAAACCGAAAGAGACCTTGGTAA
GCATCATAATCATCCGACACTATTGTTGCAGTCGAATGATCTGGAATCACCTTGTCTAAA
ATCTTTGGACGTTGAGAGAGAGAAGCTGCAGCAGCCACAAACCAGCAGTTACCAAGACTA
CCTTGAGAAACATCAGAAGTACTTGCACCATCAACAAAGAAGGCAGCATTTTCATTAATC
TCTTTTGGTCGTTTCCATATTGCTATTTATCGTACTTTTGTAGAATAAAACAATGAACTG
TCTTCTGC
>cap3_Contig697
CTTAGAACTGGTACGGACAAGGGGAATCCGACTGTTTAATTAAAACAAAGCATTGCGATG
GTCGGAAACGATGTTGACGCAATGTGATTTCTGCCCAGTGCTCTGAATGTCAAAGTGAAG
AAATTCAACCAAGCGCGGGTAAACGGCGGAGAGTAGTTTTGAGAGTTTGGATTATTCGGA
GACGGATTCGTCCGCTGAGCGTCTTGAGGAAGGCTATCAGAACCCTGCATTCGTCGACAA
GAACACCGACCTGTTGTTCTCCTTGTCGGGAAGCGAAGAAGACGTTGCATTGGAGCACTC
CTCCCTCGTCACCAGTCCTCCGCAACTACAGCCTTATGAACGTCACGTGAAACGATTTCC
CTCTCCCATCGGAACCAATCAGTTCACTCATAATGATCATGATGATGATGGAGCGCCTGA
TAATAATACGCTTACACCCCAAGGGGGAGAACAGCAACAGCTGCAGCACCCTCCATCGCA
GATGATGGAAAAGTTCGACACGACGTGTGGACCGTTTTACACTCCTTCGTGTGAGCTGGA
ACAGGTGCGCAAACACCCTCCTTCCATTATACGCAAGA
>cap3_Contig698
GAAGAAATAGTAAGGAGCATATAAAATTTGAATAAACAAGGTATCTGTAACTTGTGCCAT
TGGAATTTTTCCAATTAATGAGTTTTCAACCATTCGACGTAAAGCTTTTTCTTCTTCCCT
ATACGAAAGTTTTTTGAAATTTCCCTGTTTGATACGTTCTTCCTGAAGTTTATGTAAACA
TTGGTTTCTGTTTTTTGTATTTTTCATTTCCATTAGAACAGCATTGCTGTACATATGTTT
TTTATAACAATACTGAAGAACTGAAATAATAATAATACAGAGAACAACTACTCGTTGAAT
ATCGACATTCGGTAGAACATTATGTTTGAAATAAAAGAAGTAATTTTGCGGTATATTGTA
AGGATCATCTATCATTATATCATAGTCTCTTCGTATTTCTTCATCTTTTAAAACATTGTA
T
>cap3_Contig699
AAAACGGACACAACGAAGGCGGACAATGGACAGAAGCGGACACTCCTTTCGGACGGTAGT
GATTACAAGGAGGTGTTACAAACGTACCATCGTTATGTGAACCAACTGGCACCGCAACGT
GATTGGATGAAATACAAGTTCGGATTAAGAATAAGGGATCTTCTCGACGCGAAGAAAAAT
ATCAAAGTCCTCTCCATTGGTAGTGGATCTGGCGAAGTCGATATCGATTTCCTGAACGAA
ATCGTTCGCTGCGGAAAAGAGCGCCTCGGCGACACTGGGTACAACGTCGTGTATCAAGTC
GTTGAGCCAAATCCGGCAAACATCGATTTCTTTCGAAACACAGTCAAAGAGAACGCCGCG
TACAAACAAATCAAATTCAAGTGGTACCAAGGAACTTACGAAAAGTTTTAGCGCAGATTT
CACCAAAACGAAAGAAAGCGACGCGAACAAATTTGATTTCGTGCATTTTGTTCGCGTCTT
TTACCATATAGACAGTTCAAAAGCGTTCGATAAGACATACTCGTGTCTTCTCGCGAAAAA
CGGGATCATGTGTGCGGTGGGTGAGCACGAAGAGGCGTTCTGGCCGAAAATGATGCATTT
CCTCGCGAAATATAAAATGGCACACGAGTGCTTCTCATGTTCAGGCCCAGTCTCTCAAAA
TTATTTTCTGCCCGGTTGGATCCGCCAAGCGCG
>cap3_Contig700
GTTAAGAGTACAAATAGTGAACAATTTAAGAAAGTTAGTCAAGAATCTAGTGAAGAAGAT
GTATGGAGAATTCCTGTTAGTTGATGGCTTATTGACACTATTATATATTTAATATTGTAT
TTCGTTTAGATATGTCTGCATTTGAAGTTACTAAATAATATTCAAACGACATAATTGTTT
ATGGAGACATCTTATAAGGGATTCTTGCACTAATCTGGTATTGATTGATCAAGCCAACCA
TTCAGTGTTCAATCGCTGACTGTCCATAAGTAACAGATGATGTAGAGGCAGCAATTGCTG
TAGTATTTCTCACCATTCACAACAACACCCATGTCACAGTTGCTCCTCCAATCAACCGTT
CATGTATCTCATAAGGTTGCAATGAAGTCTCTTGGAACACTTTCCAGACAAGATGGACTC
TATTTATATGAGAAGATACAGCATCTATTCCAATGCTGTGATGGAG
>cap3_Contig701
CGCAAAAACAAAAACACGAAACGCGCGACAACGACGGAAGAAGAAACAAATGAAGTCATA
CTCGCCGGACGAAATATCGGTATTTTTGTCGGCTGTTTCACCATGACTGCGACATGGGTC
GGCGGAGGGTACATTAACGGTACCGCCGAAGCTGTCTACAAAAGCGGTCTCGTATGGACC
CAAGCTCCATGGGGTTACGCCATCAGTTTATCCATGGGTGGATTCTTTTTCGCAAAGCGC
ATGCGTGAAAAGAAGTACGTCACAATGTTGGATCCTCTTCAACATCAATACGGAAACATC
ATGGGCGCCATCCTATACATCCCTGCGTTTTTAGGGGAGACATTTTGGTCTGCTTCGATC
CTTTCAGCTCTTGGCGCCACTCTTTCGGTTATCCTTAAGATCGACATGACCCTGTCGGTA
ATTGTGTCGGCTTGCATTGCCGTTGGATACACATTCTTCGGTGGTTTATACTCTGTTGCA
TACACAGATGTCGTGCAGCTTTCTGTATCGCAATTGGATTGTTTTTGACGTCTCCCGTTT
GCATTGAAGCATCCAAATGT
>cap3_Contig702
GGAGCCTCAAGATTGTTCGTTTGAGGACAACCTGGATTGGTGGTCAAAGTATTACGCATC
GGTTGGCGAGACGACAAAATGTGGCCACTACCTTGAACGAGGGTACACTCAAATGAGAAT
TTACCCCAAAGAACTGGAAGAAGTGGAGGTGCACGGAGGGTTGACAGATTTCGTCCAATC
ATATCAATTGGAGAGGGGGAAGCAGGACGAGCAAGATGGGGAAGACCCAGAAAGTAAAGC
TGGTGAATTCAAGGGTAACTTCAGAATATATCCTCTTCCACTTGAACCTGGAAAGAAAGA
ACAAGGCGCTCGCTACTTCACATCGATCCGAGACAGCAAACCAATCGAATGCATCGTTCG
CGTCTACGTCATCCGCGGAATCGAATTGAAACCCGCGATCCCGA
>cap3_Contig703
GTTCCATTGGATTTTTTCTCTTTTTCCCACTTCAACATTGAATCGGTGTAATTGATGCCA
ATGTTTGTGCAAAGATTCTCCAGTACTTCTTTTGGATTCTTCAAAAGATCATCGGCATCA
AAAACCAGTGGTTGTTTGCCGCCTTCTCTCCTTGTTATTTCATCATAAAGACACTCGAGA
TCCGGATAGTTCAGCCCGGCCCCTTTCCAATAGTACTCGAAAGCTTCTACAGCACGGTCG
GCACTAACGGTTGAAGCCAAAACACGGTAACTTGAAGTGAACACACGAGCTGGATGTCGA
ATGAAAAACACGTGCTTGTAACCACGTGGCAGGTACGACCAGTCCCCCTTTAAACTGAAC
GGAAAATCCTTCACAAATATTAACCGTTTCCATGGAATTCCGATTCCAGTTTATCTTTGA
TGAATGCAAAAGTTAAATGGTACGATAGTGGGATGATCCACCCCCAAGTACCCTCTGTGT
CTGTGAGGACCGCAAATAGCGGCAGCGGAATATGGTTCAAGGATGAGTTCTGCATGCGGC
ACGCATTAC
>cap3_Contig704
GTTTTTATTAATCGAAAAGCTTATCAACTTTGGTAATTAATCTCTGACTGCACGTGAAAT
TGGAGAACTTTTGAAATCATGCTGCGCTTTTTACGATTCAGCAGAACTTTTCTGTCTTCC
TTACCGATCATAAAAGCATTCTTTCATTCAGGACAGCCTCAAAGTGTGGCAAATTCAATC
ATTTTGATTGGTTACAGTAATGTCCCTGTGGGAATCTAATTAGTCAATTGTGAAACAGTT
GACCATCCAACTGTATCTTTCAAAATAAACCAATCAAATCCTTTAAGATGTAATTCTTTA
ACCAATCAAATGATAGATCCAGCCAATTATTTTGAGACTGACAGCTGGACAATGATCATG
GATCAAACGTCAAACAATTGTTAATGACATTCAGTTCAATCGTCGGCATTTCCTGAATCG
TCATTGTCAGAATAATTATTATCCTCGTCGTCATCGTCGTCTTCATAATCGTCGTCATCG
TACCAATCGTCGCCACATAGGTCAATGTTGTCGGAAGACGAACCGATAGGGTTGGTGTTT
TATACAATATTCTTCGACAGTTGACGGGATTTTGATTCCTTCTTTTTCAGCATCAGCACG
TGATTTGGAAACTTGTTTACTAATAATACTTTC
>cap3_Contig705
AGAGATTTATATAAGAGTCACGACCAGTACTTAACACTTACAATATATACGACAACACTC
ATTGAATATATATAAAAAAGAAGAATTATGTACAACTTTTAAGATGATCTCCTTGTCATT
CTCCAAAGTTTTCTCTAAAACAGATTGAAAAAGAAAACTTAAGCCAGCAGGGTTGTCACT
CTTTTTAAGTGATCGTAACGACGACAAAGGAAAGGGATAGATCATATCGGATAACTTTTA
ATCGTTACGGCGCAAATCATTATGGCATTGTATGGGTGGTAATTAACATTCTCTTATTGT
TTAAACAAAGTGCGATGAGAATGTTATTTATCATCCATACAATCCCATAATGCTTTGTGC
CGTAAAGATAAGAAAGTTATCCGATATCATCTATTTCACACTTTTTGAGGTGGCAACCTT
GCTGTCCCACAACGAAGAAACCAATACAACGGAACAGAAGGAACCCAGAAGCTCTAATTA
AACATTCTACATATTCGACTATTAGAAAATAAAATAAAAGATGTAGAGGTAGAAGA
>cap3_Contig706
TTCAATACAGAAGATGGAGAGAATTTTCAGAATTGTGTAAGGAATCTTGCATACAATCTT
GTATTGAAGGGTGCAAACTATTCAGTGTTTGAGCAATCAATGTACACAAAGCTTGAACAG
GTTGAGGAAAAACTTGACCACACCAAGAAACTTCACGATGCCAAAGTGCTAACAGATGAT
CATAATATGTTGGCAACCAAGTTGTTATCTGAGTATTTGGATCCTCTCTAATCTCACTCC
ATGTTCTTGACAATGATGACTTGTGACAATTACTGTAATACGTTTGCAACTGCGATAATC
TATTGAGTTCTGAAAAGATTTTGACGTAATATCTTGCATTCTCTAAATCATGTTGATTGA
AAGTCTGCACAATTTTAGGACTCAGTGAAGCTTCTAATTTCACTTTAAGAGTTTCTAGAA
ATCTGTGACGTTCAGTGTAATCAGGAACATCTTTC
>cap3_Contig707
GTGGTCCAAAAAATCGACAAGCAGCTCGTCTTTTGATTTCACCAGGAACTTCCTCTACTT
TTGGTTCGATACTTTCAGAATCAGCAGCACTGGTTGTTGGTGGATCATTCATAAGTGACT
TTGGTGCATCTTTTTTGACAGAATCTGTCTCATCCTTTGATAAATTAGGTTGATCATTTT
CAGGTTTCTTTGGCTCATCCTTTCCATCTTCGTTATTCGGATTAATTTCAGGTCCTTTAT
GAGGGAATTTGTCATCTTTCTGAGGTATATTGTCAACTCTTTCACTGGGAAATTTATCAT
CTTTATTTGACATATTTCCAGGTCTATCATGAAAAAATTTGTCATCTTTAACTGGCATAT
TGCCAGGTCTATCATGAGGAAATCTATCATCTTTATGCAGC
>cap3_Contig708
CGTCACATGCATACATCAGCAAAAATGATATTCTAACGATTTGATTGGTAGGGTTTTTTT
ATCCAATTTCCCTAGTCTTACCATCACCAGCAGGAATTTTACACACGGGAGAGAATTTCC
CAAATAAAAAAACCGGCATATTTTTGCTGATGTCAGCATTTTTTTAACGATGTCTACTTA
CGCATGCGTACTTGAAAGAGTATCTCTGTGAAGAATTTATCGAGTATTTTTTTGCTGACG
TTAGTAAAAAGATTCGTTGAAATTATAATCGTACGAGAGTTACTCTTGACAGAATGTAAA
CATGCGCGATATAAATTGCTTCTTGAACGAATTCAGCGAGCAATGGTGAAAATGAAAAAA
GGTAAACAAGACAAAATGCGGGTTAAATACTGGTGATATTACATTACAAGAAGTAGTTTA
AAATACATCGAACGGTAGAAATAAAAGACTAGAAACTTTATAATACATCTTGTCAATTCA
TTACTTGGCTCATGTGTTTTAG
>cap3_Contig709
CCATTTATTACAGGCAGCATTGAAACAGTTGTAATTAGTGCTTTTTCGGCAAGCAGAGAA
TTGTAGGCGGTCCATGTCGATACTTGTTTACTAAAGACAGGAGACAGTGTTTTCAATAAA
AACCAAGCTGTGTCATTTCTGACTGACCAATCAGTAGTTGAAGAAGAAAGTTCATCAAAA
TATCCCCAATAATTAAGATTTGGGATAATTGGTTCAGAACACAGATAATAATCGTCTATG
AACGTCATAGTTGATTTCGTATTTCGTTGTATCTCGATTGAAGGCTAAAAGAGGAGAAAA
ACTATTTGAACTCTAGACAAAACTGAATCAGAAAAAAGTGGTACCGACTTTCGCAGTCCT
TTTTGATTAGCAAATACTTTTCATCCAAGTAATCAAAATCAATATTAAAATCAAAGATAT
GAAAATATAGTCAGATATACTTACATTCTCAGTGTTCTGCTTTAATTGGTATGCTGCTGT
AGTCTGTTCTGTGCTAATTTTTTTACCATTCTGTGTATCTAATTTT
>cap3_Contig710
GTTGATTTTCATCGGATATTTTCCCGACTTTCTGTTCTGTCTCCCGCGCCTTCCCGACTG
TCTGATCTTTCATCTTCTTGTGATTCAAGTCGATTATATCCATCATCTCTTGTAGATCGA
TGCGTTCCTCCTTCTCCTTTTCGAGGGTGTAATGGAGGATGTGGTTGGTTTTGGTGAGAC
CTTCGATCTGTTCTTGGTAATTTTTTTTCCTTTTAATTGCAATCTGCAAGCTCTCTTTTA
CTGTGAGATGAATATTCGTCATGTTTTGTAAACGATCGATCAGGTCTTGGTGCTCGTTCT
TCGTTTTGGAGAGCGACGACTGAAGGGCTTCTTTTTCCTCAGCTTCCGTCTCGAGCTCAT
ACTGCAGTTCATTCTTGTCTTCCAGAAGTTTCCTTTCGTTGATCTTTAATTGAAACAAGA
TCTGCCCGGTCTCCTCAAGACATTCCTGTAGGTACTCTTTCTCTTTGATCTCTTTCTGCA
GTCGATCTTTCAACGTTTCGCCCGCGTCGCTCAACTTTTCGATGATCTCTTGTGAGTGCG
AGATTTGCTCCTGGAGTTCTTCTTGCTCGTCGAGAAGTTGTTTCCGCTTCTTCTCCAAGT
GTCGAATCTTCTCCTCCAACACATCTTTTCGTCTTGA
>cap3_Contig711
TTCGTGTTTTTAATTAAGAGTGTGTGCGCATGTGTGTTTATACGCTCGATATGCCATCCA
TATGATCATAGTGGTGCGAGCGGAAACCGGCGAATCAAAGATCAATGTTCAAGGTATCAG
TCCAAATGCGTAAATTGTGGGAATATACGAAATGATATCTTATTATGTGAAACCTAAATT
CAAGTAGACTTTTTAACAGCTGCTACGATGCTTTCACAATGACACGAATGTGAAAAAGAT
TTATATGTTATGTGGAAAAATATATATTATATGAATATAGTAAATCAGCTCAATTTCTTC
TAATCTTTCAATCTTTCAATGACCTCAACGGTTTTTAACCCACTACTACCTACCCATTC
>cap3_Contig712
GTGGAGATGTACATGAATTATCTTATCTTTAATGATTTTATTCTTTTAGAGTTCTCACCA
ATAGAGTTACAGATGAAGCTAATATTGAAAATGAGTTAAAACAACGTATTGAGGCTGAGA
GGTTTTTCTTCAATCTTCATCATGAAGCTGAGTCAAATGAATACCAAAAAAAGTTATTAA
AATGGAAAAAGTATCAAAGATCGAAGAAAAAAGCTTCAGTTGGTGATCAAGGTATCAAAG
AACAGGAGGAAATCCCCATAGGTATTTTAGTATTTAGGTTTAAATATTATTATTTAAGTG
TAACGACTTAAGTACATATATGAGAAAATAACGGCTAGTAGACACGACCAAGAACGAAAT
TGCAAATTTTGTATTACTATACTAGTCTGCTGCTCCAGGGTTGAAAAAAAACATAAGCTT
TGCAGGAGCATGAAAATTCTGTCAAATATTTCCGGCGAGAATCAAACAAGTTTCAAAAAT
CGGACAATCCTTCAATTTCCCCTATA
>cap3_Contig713
TAAATCCAGGCTTACATGAACATTTGAACGAACCACGAGTGTTTGTACAGATCTGTTCAC
ATTGCCCGTTTGCTATCGCACATTCGTCGACATCATTGCAAGTGTGTTTATCTGCTGCTA
ATGCGTAACCAGGGTAACACGAGCATGTGAAGTCTCCAACACCGTTCCAACAAATTTGGT
CACAGTTGTGTTGCCCGCTCGTGCATTCGTTTGTGTCTGTACAAACCTTTCCATACTGCA
GCGTGTAGCCTTTACTACATTGACATCTGTAACTCCCTGGTGTGTCGACACATGTCGCTT
TGCAGCCTCTGCTAGCGGAATCCGTCCCCGGTAAACAACTGCACAGCTCCTTACCAGACC
CCTTTGCAACTGCACATTCATCGACGTTTCTACATCCAGGGTCTGTGATGCTCGTCTCGT
TGGTTTTCACAAAGCCTTTGTGACACGTGCATGCAAACGATCCCCACAAGTTGGTGCATA
CCTGGCTGCACGAGGGGTA
>cap3_Contig714
AATATTTGTACACATTTCATCAAGTAGGAGTTGACGTCTCAATACTATTTCCATCCAGTC
TATTATTTTGATTATTACTATGGTTACTATTCGACTCGGATAAGTTCTTCAATGCATTGT
CCTCCTTATCTTTTGTCGCTTTATTATGAATGTATCGCTGTACTTGCTGGATAACGGACG
GAAAGAATGTAGTTTCGCAAA
>cap3_Contig715
ATTTGCGATTGCAACAAACTATTGGATTGAGTATATAGCAAAAGAGCCTGCAGATGCGGA
CGATGTATCTTTATTCAACATTGGATTGTTTGAAAAATGTCAAACCTATCGTTATGACAT
GGAAGGGGAAGAGGATCTAGGATGCAACGACTTTACTCCTGATGTAGATGGCTACACAAC
GACGCGATATATTCTTGTTGGAACATACATCATAGCGTTGTTACTGACTCTTGTGGCGTT
CATATTTGTAACTGTTTATTGCGCTACGGGGAATATTATTTCCCCATCGGTCGTGTTGCT
ATTTGCTTTGTGGCTGCCGCTGTTTGTGTCATGGCAGGTTTGATTTCGTACACAATTAGC
GTTACAAAGATACTCGAAACGCCACCTTCTCTTGGTCATATGGTGCTGGGTGGTCCGCCG
TTGGGATGTACATTA
>cap3_Contig716
AGCTAGGATGTCACAAAAAAAAATTGTAGAGTTGCGAAGAGTTTTACGAGAAGTGACTAA
AAAGTTTTCAATTACAAAAACAATGAAAATTGCTGCATATTTTGTTGTTTTATGGGTTCT
TGCAACATTGATGTATCAGGAAGCTTTATCACAAACCTCTGCTGCTGTAACGAATATCTT
GTCATCAACATCTGGAATATTTACTCTTGTTTTGGCAGCCATCTTTCCTAGCTCACTAGC
TGATAAATTCAGTTTATCGAAATTGATTGCGGTTTTTGTTTAGTTTTGGTGGTATTTTTC
TTATATGCTGGACAGATCCAAATCGGGAAGCTTCAAAGTTCAACTACGGTGAATTATTTG
CGTTATTTGGTGCTATGCTGTACGCTTGTTATTTAGTGCTTGTACGTAAGAAAGCAGGGG
AAACGATAAACTTGATATCCCCTTATTTCTGGGTTTTGTTGGACTTTTTTGGATTTATTA
TTGTTCTGGCCTAGTCTTTTTTTATACTA
>cap3_Contig717
TCGATCGTTTCTTTGGCGTACAATACCCACTACAATACAAAAGCTGGGTAACAAAGACAC
GCATGTTACGTCTACTAGTCTTGATATGGGTTTACGTGTTTTTACTGTGTTTGTTACCGT
TTCTACCGCATGGTAGCAACCATCATTGTTACTATTACCAACCAACAGAATGGATTCTAG
GGATGTTGATCATGCATATTCTAATACCACTCATTCTCACGTGTATATGTTACGCAATAA
CGTTCCAAAAAATGATGACGTTAGCACGCCGACAAAAATTCCGAGAATTTGCGTTGAAAG
CATCAGCTATAACTGTCGGTGGTGTTGTCGGTAGCGGCTCCGAAAATGGTCGGCATGATG
TTCGGAGTAATAGTAGTAGCGAACGTTACGAGAAGAAATTAAAAAATGTAAATTCACGCT
GCTCATTGTCGGTGTTTATATCTTGACATGGGTTCCGAACTTGTGTTACGACTTGTTGCT
GGTGATGTGCAAAGTGAAATGCTTCCCGACAAATTATTACGACAAGCAT
>cap3_Contig718
GATGAAGATAAAAATTAAAAGAACAAAATTCTAACGCATGCGTTCATTAGAAGAACAATA
ATGTAAACAGAGGAACAGAAGACAGAACACATTTTTGTTAATTTTGTATCAAACTATAAT
ATAATGCAAAATACTCTTGATATCTCGACTACACAATTCGTAAAAAAAGGGTTGTGAATG
ACTTCATGACGTCATCATAATAATTCTTCATTTTCAATCCCTTAATCAATTCATCTCATT
GGAGACCAGGGCGTGTGTTTTCAATTGCCACACACACACAAACACAAACGACACGCGGTT
TTATTCCGATTCTCCGAACCTCATCTTATCGGATTTCTGGGATTCACGGACAATGGAATA
ACACGTCACCTTAACGTCGTTGTCGTTAGGTTATCCATAACAACACGCGTGTTTTTTGTT
TACACATCTTTTCCATCATCCCGCCACCGCCATTATGGAAACTTTACGCGCGCACGTAAT
CATAAC
>cap3_Contig719
CTTGTTGGATTTCCTCAGCAACCATTTCACGACATTTCGTTTTGTGACTGAGCCAATCTT
TCTGTTGACAAAATTGACCACAGTAGTAGGAGCGATAGCAACCGGTACACTCCAAATATG
CCTCCCGCCCACAGTTCTGACAGATTTTAGACACTTGGACCATATATTGCTGTGCAGGTG
CAGGTTGTTGTTGTTCAGACGTACTAGTTATAGGTGTGTTTTGGAGAATATGTTGTAATT
GACCTCGACGGACAAGTGATATTGCTTCTGCTTTATCGCTCTCAGCTTGTATTTTGGCTT
GAGTAACAGCACTATCTTTTGTGGCTTCAGATTGAACTTTCACTTGCTCAATCATCAGTT
TTAACTTATTAGAAATACTCACTAAATTTGTTGCCATTTCTTCAAGTTGAATCCAATGTT
GCTGACTATTGATGTCAGCTTGACTTTGAATCTTTGTTGAGGCAGGTGGTGGTAAAGCAT
ACTGACTGCTTGACGATACAGCAGCTTCTGGTTTTGTTGTAGTTAGAGTAGCACTGTTAT
TTGCAATGCTTATATTTTGAGTACTACCTGATGAAGGAACTTGTAAAGTAACAGACTTTG
GAGGCGAACATGATCTAAAG
>cap3_Contig720
CCTGTCTAAGAAAAGCAGTTGTGAATGGTTTTACCACCTCCATTATCAATTTGTGGAATA
AAGCATTTGGTGAAGAATATATACAGCCAAGAAAGGTTGTGCAAGATAAAGTAAGAAGAT
TGCTTCAGACTTACTACAATGATGTTACCAAAGCTGCAACAAGCAAGAAAAGAAAAGTTG
ATGACTTAGGAAAGAGCAAACGTCAGCTCTTTGCTAGTTGGCAAGAGAAGCATAAAAAAT
TGTTCTGCCTGTTAAAAAAGGATGTTAATTTTAGAGATTTTGATTATGAAGAAAGAACAT
TTTATGAAAATCAGCAGTTGCCAGAAAGAGTAGGATATATATCAGCTAAGGTAGATGACA
GCTATCAGTTTCAAAGNGAGGAACTTGTTGATAATGAGACTATAGAAGAAGTGAGTGATG
GTGATGATGATAGTGAGATGGAATCGA
>cap3_Contig721
GTCGTCTACTCCGGACTTCATAGTATCTCTAAGAACGCCGGAACAGTTATTTTTCTATAA
CAACTTGCTCACAGAGAATAAAATCTAAAATTATTTGATATAAATTATTCGCATTCATCA
TGCAGAAATTACCTCATTTGTCGAGGATTAAAATTGTTCGAATATATATTCTTTGCGTTT
TGGTAGTTTTACCCAGCATTCATTGCAGTGTTAATCACATTATCAACATGTGAATAATGA
ATAATGCCTATGTATGCTGTTCATGGTATCCACGACGTAGCAAATGGCGGCAAAAATATA
TCAAGCTACGAGAGTGTTCCATCAACATAGAGCAATAACGTCATTACAGCACAGATATCA
TGAATATCTATAATCTTAACCCGTTTAACTGAGCATAGAAGTATTTTTTATTTTGATAAT
AGAATTCTTAATAAATCTAACAGCGCTAGATTTTCTTCTATGAGTTTTGTGCATGGTACT
TTATATGATCTAT
>cap3_Contig722
CATGCGGCTCCATTCCTTATTACTATATAGGATATATCAGGTATTTAGGAATTTTCGCTT
CGATAAATATTGTGCTGACAATGATATGTTTGATCGGGGCTGTCATTATATACAGCATTT
ATTTGAAACCTTCGAACCGTATACTGACGCAGATGTCAAAAAGGCAATTCACTATTGCAG
AAAAAGCGCGACAGGTACAGTCCGCAATAGAGCAGATACACTAAATAATGGAAAAGCAAG
TCTCCAACTTCCAACGGTAGAATTAACAGGAATCCAGCTAACAAAAAAACCCTCAAAAGA
CACAGCTAAACCATCCGTGAAATCGTTAGAAAGAAGCGCGAACAAATCCTTTCTCCTCAT
GTTGGTCGTGTTCCTGATAACGTACATACCTGCTATCGCCATGACAATTTATATGAACGC
TTGCTGGCACTGCGATTGCGTCATAGTTCATTGTTGC
>cap3_Contig723
GCGAGCTGTATACAAGGGGTGGGTAATGACGATGATGATTGGGCGTGATGTGATGCGAGT
GCGGTGACACAGCAGCATGAGGTGATTCCGATGATAATGATTTAGGTGGAACGACTAAAG
GCATTGCTTTATCTGGTGATGCGCGATGTTGATCAATTGATTTAAATTGTTCTGAATTCA
ACAAAGTGTCATATTTTTTCGAATCGGATGATGATCTCACTTCTGATTCATTGACCATTT
CATCGATGTATTCAGTGTCATTGCTCGATAATGTGCTGTTGCTTTTGACCGGTGATGTAG
ATTCGGAGTTCGCAAGACGATGTCTTTCTCGTTGCCGTCTCTTCGTTTCTCGTTCTCGTT
TTCTTAGTCGTTCAAGTTCGTCGGAAGGTAATAATGTCGGCGGCTGAGTCTTCTTCTTTC
CGTTCTCTTTCTGGTCTTCCTGT
>cap3_Contig724
GTTGAGACGAGGAGCGTACAAACGGACATGCGTTGGGTGGACGTACGCAAACTGCTGCCA
GACAATATGTATGACCTTGGTGTGGACGGAATGAAACGATTGCTGTACCGGTTGAAACTT
GATTTGTTGGGAATCTCTCATCCGATTCCATTTGACGGCAGCAGCAGTTCTGACGACGAC
GACGAATCTGAGCAATCGCTTGCTAACCTCTCCTCGGAGGCCGAAGATGCTGATGAAGAA
ATACCACTCTCTGTTGACACGTGCAAGCATCACGGAGAAGAGGGCGATGGAGATGGGAAG
GATCCACCCAAAGATCGATCACCTGAAAACATACAGATTCAAGTCATCCAAGAGAATGGA
GAAGAGATAAGAG
>cap3_Contig725
GTTTTATGAGCAAGTCCAACAAGCATGGGGTATTTTGTTTAGGCGTTATATAAATAGTTA
GGTAGAATTCTCGAAGAAACTTTTTTCAAGAAACTTTTTGCTGGAAATTTACATATTAAA
TAATCTCAGCCCTACACGTATTTCTTTTATTATCTAATTCAGTTTTGTTGAACAACAATT
CACAAGAAACTTGAACCCAGGCTGGCAACATGACAAGATTTAAAGTTACCTTTTCTAGAA
AAAAATGAAAATTGGAGAAGACCAAATCAATTCGAATTCGAAAAAACAGATGGCGATATC
TTGACTTGCTGTCGTTGTTTGTTAGTGTCAATGTCAAAAGGAGAGTTGGGAATAAATTAA
TCCTATTTTGGTTATTATGATCGTGGAGGGAAACGTATGAGCCAACAAAAAGGATATAGA
AAAGCGAGGAGATAATAACTCTGGTGTAGATAATAAAACACTCACCATCTCTATCGTCCC
CATCAGTTCATCCAGCATCTTTCTCTATTTCGTCACTCATGGTGGCGATTTGTTGATTTG
T
>cap3_Contig726
CCAAAGAGTGGAAGGGACGAGCTTTGGACAGGAAGTTTGATATTATTCAGTAAACCTGAT
GGAGGCCAAGAAGAAACCATGAAGTTATTTTCATCATTCACTTTCGTGGCGTCAGGCTCA
TTCATCAACTTCTCCATTTCGATCGATGAAACAGAGAGAAAAGTTTGTCGCTCTTCTTTG
AACGTCGAAGTCGAACCGAACGCTGCTGCATCTTCTTCACAATCCTCGTCGTCGTTCGTC
GGTGCAATGTGATTTTCGTTTTATCGATAACCATGGTGCTTCCACACTCGGTACAATACA
AGTTCTCCAAACAGTCAGCATTCATCAGGAAAACATTGGAACATTTCAAACATTCGCAAT
GCTTCATTTCTGCGATCTTCTTCTGATAGTTCTTCACGGCTATGGGTTGAACGTTATCCA
TGAACGAGTGCAACTGCTCCTCCTGATCAAACACATACTCCCTGTGCTGCCAGTCAATCC
GCATCAGATCGAAAGT
>cap3_Contig727
ATGGCGTTTTTCTTTCTTCCTTTTTCCCACTGGCTGTAGTTGGATGGTTGGGTAAGACTC
TCTCGTGAGATTTACAAATGGTATTGATAGGAGTATGGTAACCATTTTTAAGATTGCATC
TTGTGTCCCAAACCATGATGTTGCCATCTCTTGCACCAGTCAACAGTATACGACTGCTTC
CTGGTTGCACTGCTATGGACTTTAAACTACATGTATGTCCACGAAAGTTTCCAATATTTT
CACATTTTTCAATATCCCATAATCTTGCTGTTTGATCACCCGATGCAGTAACCATTTTCG
ATTCCTTTTCTATCCAAGCAAGATCAAAGATAGCATTTGAATGAGCAGACCAATCTTTGA
GTATAGATGATTCTTTTCTCTTTGATGTATCAATAAGTTTCACACGTCCATCTTCATCAG
CAACCCCCAACATATTACCATGGAGTATGTCTTTACTGAAGCATGACAACAAATGGTGGC
AATGGCAT
>cap3_Contig728
GTTTGGGAGCAAGGTCGATTGTGAAATAAACTGTTTCGGTGATCTGGCATTATCTTCCCC
AACTTAATGTACATTGACGACCAATTATATGAAAAAGCNGAAAAATGAATTCTGTCGTGG
CGATATTTGCATCCCATTAAAAGAGGTTAAAGATACAGTCCACTGCTTCTTTCCAGCTGG
GGTAGATGATGATGATAAGCCTCTTCTGCCCTTGTCTAGTCTGCTCCAGTTTGAATCAAG
TGTTCTACCTCTGAAAGGGTCCAACCAGGATTCTCAATTACCATAAAAAAAGGGAAGTAT
GTGGACTATGTTAGCTTACCAGTTGGTCATGGCCTAATGGAAGGGGATGATTTGGTGGTC
AGAGGAAAAAGCTACAACATTATAGGTATCTCTGATGATGATTCATCAACATTAGTTCCT
TTCACTAGGAATGTAATAAGGGTAAACAGGGACTTTACAAACAACTGCTCCAATCAAAAG
CTCCGATTCAAGAAAAACCCAACAATTGCTGGTAAGATTTTGGAAGTTTCGCGAAACCAA
TTGCGACCACACCACAAAGTTCTGGTTACTTTCAAACCAAACTCTGATGGAAATGATCAT
GGTGTTGTTGAAATCACATTTAATAATGTGATCTTTAACTCATCTGGCATTATAACACAA
GATCGAGCCATCTCAATTGCTACATCAAAGAATTGAGCATAATCATAATCATTATTTTAA
CTTGGCAACGTTAACTTTACTGAATAATTAT
>cap3_Contig729
CAGAAAATGATGAAACAATCGACACAACAACTGATGAGCCTTCAGATGATATCGAATTAG
AGACAGAGACAAAAGAACTCTACTCTACTCAGGATATTGTCGATAACGAATCAAGTGAGA
AATTAGAGACTGTTGAAACTGAAGAGAAAAAGGAAGACGGTTGAAAGAATTCTTCGTTGG
TTAGATTTGAAAAAATATATGCGATTTAATTCTTTGAAATTTGTCATTTCCTTCTCATGA
AAAACGTTTTCTGCTCCGTTTTATCATATATATTAATGAAATTGTTGTGTTTTGTTCTCC
CGTGCATTTTCCCATGCTTTGTTTAATCTTGGTTCTCTGTATTCTGTTTTTATGGTAATC
TGGTACTAAGTTATCTAGGTTTTACTTTTCAGAGTCATGTACTGGTTTAACGGAGGTTAC
CATTCCTCTTCTGATTGTCCTTGATTGAGACTATTCTTGACGTTG
>cap3_Contig730
GTCATTCTTATCTAATTGCTTAGAAAGAGGGTTCAAAGGGCCTGTATAGTGGTGTTTGTA
TAGGACAAACCCATTTTTGGTAACTTACCAATAGAGGCATGTATATCCATGTTCGAGTAA
ATCCAAAAACTTCTTGATATGACATGTGTTTACGTGTCAGCGCATGGAGTACAAATAGAC
ATAATTGACCACAGCAATGAGTATGTATTCATTGTACAATATTACTATTTCTCTGTATTA
CCCCTTGAATATATTCACTTTTTGTTTTCAAATAATGTTGCAACTCTATAGGTGTATCGT
GTACCAAACGAATCAAAATATATCCGCCGCGACTCATCCTTTAAATAAGACACCCAATGT
GACCTCAATGTAGAATGTTTTCCAAGATTAAAAATTCCAGTCTCGAGTCGATGGGGTCGA
CTTGGTAATTCATCGCGCATAAACACACCTCGAAAATTTGGAATTTCAAACTCATGCACA
CATTTGAGCAATTCAAAATTAAGTCATTGCCTCATCGCTGGCAAATTTTATAACC
>cap3_Contig731
AAAAGGGTTAAAAGGATACTATTTGAGGGTAATAACAATATTTTAAAAAGAACATATTTC
AGGGTTTTTTTACCGAAGAGTGGTGATGGGTCGGATGCCCAGATTTACCTAAATTAGGTA
GGCACGAGATTCCTTCCTTTTTCTAACTGATTTTATTTTCAAAAATGAATATTTATTTAT
TCTTCTCTTTTGAGAAGTTGTCAGATTTGCGATGCATTATCCATTCAAATAATTTTAAAA
TTTCCTGGTACTAACTGAATCATGTATGAAGTTAACTCTTTGTCACAGTTTCTTATAGAC
ATTATGAAGACGAATGACATTCTGTCAAGAGGAACTCTTATCAATTATTCAAACTGTTTT
TTGTTACTATTAAAATATTTTTCTATATACTTCTTCTTCCTCTTTTTTTTTATATCTTTC
TCATCTGGTTCGTTTTTATGCATTTTGATTTTGAAGAGTTGAAATCTTTGCTTATTTTAG
GGATGGGGGTTTATGATGTGTTGCTTATTGAATTCTTTCTG
>cap3_Contig732
GTGTTCTTGACGGATTGATGGCAGCTCTCGACTCAGGCTCTGCTTTCCGTGATCCCTCTA
GACCTCAAAGAAGGAGGCAACCAAGAAAAATCGCAATGCTCCTGATATGTTGCAACGTAA
AGGCACCCGCGTAAACATGGTACCTATCAAAATGTTAAGTCCTGGTGAGAAGCTCACGGA
GAAACTCAACAGTCCAACTTAATAGTAGTAGTCGCACTACCAAATAAAAAATATAAAGAA
TAATAGGCCCGCGTGGTGTTCTAAATGCTTTCTCTATAACAACGTGCAGTAACATCACAC
CGATATCAAGCATATTTCCAAGGGCGTAATTCGCGTGGAAATTAGCCAATAACATCATCA
CATCCCAGTCCTCGCGGAAGGGATGTTTCAGCTAAATGAGATCTTAGCGAATTCGTTGTC
GGCGTTAGTAGTACGTAAATAGTAACGAGGGTATTCGGTGAATCATCAGTTTGCATTCGG
TCATAATGTTAACT
>cap3_Contig733
GTTTGATTCAGTTTTCAAAAGCGCAACAACAATACCGGCCGCCGAGACAGACATGCGTAC
AACGTTTGCTTACGAAGGAGTAACATCAGAAAGAAAAAAGAATCCAATTACGCTGACAGA
CACTTCAACTCCAGACGCAAAATTATCCATAGCAATAACAACTACATATCCATCGATAAC
AAAGGAAAGCAAAACGGCCTTAGTTACAGGAAATACAGACAACACCACGCTTGCAAACGA
GTCCGCGTCAACTCTAGTAGTAGACACAATTCCAGTCTTAACAACGCCTGTAAACACGGA
CGCAATGACAACCCTAATAACAAACAAAAAGACAGTCCCGGGATTAAATAGAAACACGAC
GTCAGCAACGCTGTATTCAACCCTAGCAACTGATATATTCCTAAACAGCTTATTGTTTAC
AAGAGGAAAACCCTTTGACAGTAAACATGCGGTGCGCGCAAGACAATAGGCATGCACAGG
ACAATAGGTGGGGATGATGTTGCTACAAAACGAACGAATAACTCAACAACAATGACAACC
G
>cap3_Contig734
GTCCCTTCCCACTAGGACCTTACTACCTTACCACAAACCTCCTGGTTCTTTCACAGACAT
GAACTTTTCACTCGACTGTCAGGTTCTGTATAAAAAGTACTGGTTGATTTCTTATCAACT
CACACATATCTATATATATTATTTGTTGAATATGAATAAATAGATGTAGAGAATAATATT
TTTTATATTATCATTATTATCGTGGAGGTTCACTACCCCACATTTCACGATAAATATGTT
TTTGCGTTTGTTTAATTGTGCAGTATTGAAACCTGGATGAGAAGCGGACATTCTTGAATA
ACAGCCAGCCAGTGGACCAAATTTACCAAATTTACTTTATTGATGTGTCCACGAGTGGAG
AACCAGATACAAGGCATGGTGGATAATCTAATGTACGGACATTTATTATAAGGTGTCCGG
TGCTAAGTGTCCGCTTTTTCG
>cap3_Contig735
CGGATACGAGTTGTAGAGGAAATCCAACACAGCACGTTCATCGTGCGAGCCTCTTAATCG
AGACAAGCTTGATAGCGTCTCGTTTATTTCTGCTTTATTTTGGTATACTTTGAAGGAAGA
CTTTTTGATTTTCGACTCACCATACGTGAGGAGCCCGATTTTCGTCAGTTCGTCGCCGAC
AAACTCCTGCATGAAGAGTTGTACGAAGTGTAAGGTGTTTGCCCATGTGACGTCATCAAC
ATGATAGCAGGAATCAATCGCTACTGCAATGTCTTTTCCTGAAAACCTGTAAGCACCTTT
TACAATTGCTGCTGGTACCAACTGCATGTCTTTCCACATATCAACACTCTTCCTGAAAGT
GAGCACGTTCTTCTCTTTGTTCAACGACGCCAAGGCCAGAAGCTCGTTCCTATCAACACT
CGACCCAACTCCCACAGCAACTGAATGCACGTGCAGCATTCGAAGGTTCACCGATTGATT
GCG
>cap3_Contig736
CTTGAGTTGAATCTGCTCGGTTGCTGACTCATCGAGTAACTCAGACTACACAAACTCGTT
TCAAAGTCTTTGCGAATGAATACCGTTTCTTCACGTGCTACGAGCGTACTGGCCATCATT
TGACACAATTTTGCTATATTTTCACCAGATTTTGCACTTGTCTCAATAAATATTGCGTCA
TTATTTGTTGCTAGTTCTTGCCCCTTCTTCTCCGAAACCATTCTCTTGTGATGCATATCG
GATTTATTACCGACCAAAACAATGAAGATGTCTTCGTTTGTATAGTCATGTATCGTTCGT
ATCCACGTTTTTGCGTTTATAAAGGAGACTTCTTCAGCGATGTCGTACATCAGAATGACG
ATGTCGGATTTACGAAAGTACGACGGTGGTATACTGTTGAACCTTTCTTGTCCAACTGTA
TCCCAGAGTTTGAGTTTGATCGTCTGTCCGTTACATTCGAGTTCTTTCGTCGAGCAGTCG
GGTTCCATTCGTTTCTTCTCGTTG
>cap3_Contig737
GCAATATTAAGAATTTCACATGCATTTATATCAGGTCCATCTTTGTTATGTAGTGCAGTG
GGAAACACATTAGTCGTAGTAGTTTTAGAAATTTCTCTTAAGTCATATCCATTCACTTTT
ATCCTGACAACATTTTCTAAATATGTCATTGTCATATCTGGTAGGATCTTTTCGTATCAC
AGTTAGTTTGAATTCTAACTTGAAGCAAATAGTGCATTCATAGTCAGGTCCTTGTTTAAA
AGCATTGAAAACTTCTTCACTTAAAACCGCATATGCCTCAGTATCAAGAATCGGTGGATC
AACCATACTCATTCCTTGGACAGCTTTAAATGCTGTACCTTTTACCATCTTAGCATTACT
TCGACAAGTTTTATGCTTTTCAGTATTATCTAGCTTTAATTTTAGCTTGTGTCCTCATCA
AGGTTAGAGTCGTTTAACTTTTCTAGT
>cap3_Contig738
AATACGTAAAAAACTAAGTCACCAAGCCCAGGTTCAACGAGTTTGTAGATTTTGAGAAAT
TATCAAAAGGTCGGCCATATGCCTCTACTGTTTATAGGACGCTAAAAATAGATCCTTAAG
AAAATGATTGTGACGTTAGAATCATTGGACAGTAATCATAACCAGTTGTTTAAAAAGTAA
AAGAATTCCAGCTCAATAAAAAAATAACGTAACCTTACCGGTCTTAGTATTAGATACATA
AAAAATCGTTTTAACATTAACAGATGAAAAATTAAACATACTATATAACATAATATTTCC
ATTTACAAATTCAACTCGACGACACTCTCATTTCTCCTGTCAACGATACAATTTGGTTAT
TTTATTCCCCATCAGAAGACCGGCACTCATTCGAGGTGAAATCTTGTCATGAGCCGAGAA
AGCACGAATTGCATCCGTATGCGATCTAGACGCTTCAAGNTTTAACGTCGATGTGAGATT
GACGGGTCGTGTGTCGGATGCAAACTGATAGACGACAAGCAAACAATCACAGCATAACTT
TACCACTTCACGACAAC
>cap3_Contig739
GTTTGATTCAATTCAAAGCCCAGGTATCGGAATGAATTTCCATCGATGTAACCATCAACT
CACCAGTAGACGCACGGCGTCGGATTCTTTGTGCATCTTGACGATACTCATGACGTAGCG
GGAAAAGAGTTGATTCATTTCGTTCTGGTAGAGAGAATTGTTAGCAGCCAGCCATTCTTG
TAGTTTACTTCGAATATTATGCTTCACGACTTTTGACGCAACCTCTAAAATTTTTGAATG
CGTCGAGTCTGGTAGTAACATCTGCATGCTTATCTTGACTTTTTTCTGAAAGATAATTCT
TAACATATTCATGTGCGACCTTCGAGGTCCCATCTCTTCCCTCATCGTACTGTTCTTTAT
AAACATCACTGTTGTTCGACTTTAATTCTTCTGGAGTAGCTAATCCTATCTCGCTGATTC
TGAACTTTGATTTGATTTTCTCAAGAACATCCTGACAGCTGGTTGGTATAACAACTTCAC
TGATATGGTACTTTATATTGG
>cap3_Contig740
CAGATGAAAGTGATTCCTATAAGATTATGCAATCAATTGAATCAAATCATGCTGATATGC
CTAATAATGAAATGTTTGACAAATCTACAGAATACAGCAACTTTGCAAAAGAATCAAACA
ATTTACCANACCTTGATGCGACAAATGAGTGTAACAGAGGGAGTGAAAAACCTGATTGTA
GCCTAGATAAACTAACAGATATATTGCTAACGGATGCAAGAATAAATGCTGACGACAAAA
TTGTCAAGTATTGTGCCGAAACAAGCCACCGTGATAAAGAACCTGCATCGCCAAATAGAC
GGAAAAAGAAAAAGACCAAACGAGGAAAACCCTGGAACACTAAAGTTATTTCGTTTGATA
AAAGAATAAGCAAACTAGAAATTTCATAGATAAAATTTTAACATCTGATAAATCGCATTG
CCAAGAAGGCAATGTGTACTATGATATGTGGAAGACAGATCACCCAACACAATTTACATC
TGATTTATTGCTGATGATTTCAAATAACGATACCAATATCCAGTGCCAAAAATTAGAGGA
AACTAACTATCAATTGTTAAAGTTCAAGAAAAATATCAAAAGTTCATTTTTTCCTGACGA
AACTAATGATTCAGAGGAAAATATAACAAATAGTACAAAAAAATTGCATTGTGAATGAAA
ATGGGACAATTGATCAACTTAATTCCA
>cap3_Contig741
GTGTTTCTTAAAGTTGACATATTTTATGTTTACCGTCGAATAGCGAATATTAGCAACTTC
GGTACTATCTCCTTTCATCCCTTCATACATGTAATCATTATACAAAGGTTCCATTAGTTT
CCACTCCACTGTCCCGTTCAATACACAAGTGAAAGAATTAAGCATGTCTTTGCGAAGCAT
ACTTTGATGTTCCCCGGTGCTAATCTTCATGTCTACTTCAACGAGAGAATCTTTCAACCC
AGCGCATCCTAAAGGTGGAGGTATTTTTACGTATTTATACAATGGGGTTGGAAGCTCAGA
GTCGACAAATTTGTTTATCTTTCCATCAGTGTAAGTGTGCAAGAAATGTGCCAACGTATC
TCGCCCAAGACATACATCCCCTTGTGGTGGACGATCAGCAGATTTATTCTTCACCCGATC
AATTTTCATCTCTAATATCCCATAATGCTCCAGTAAATATTCGTCAGTCCACTTTGTGAA
GGCCGGCCATGTTTTTGCCACCGACCGTAGTATGAGAGGGGCGGGCGTTACATCGAGTAG
GGACACGTGTTCATTGACAAATGCCTCGGAATTTATTGATTCGAGTTCTTTCACCTTCTC
TGTAGTAACACCCTAACACATTTAAATTGTTAACACTAAAATTCAAACAGATGTAAAGCC
TAACTGCAGTCTAATTTCTTATATCGCTATATCTTTAAAA
>cap3_Contig742
GAACAACTAAAACACCTAGTGCTGATATGCAAAACAGAATGCATTTGTTTTGAACAATAG
TGTTAAAGAAAAACAATTCGAATGTTTGTGTCGCCTAGAATAATTGACTAGATGAAATAA
AAATCTTTTTATATTTATCATTGTTATTTATACATACGTTTTTTATCTAATATTAAGGTC
GTCCAATATATAATAACCATTTTCCTGGTAAATTCCAAAGCATGGTTGATTTTTTATTAT
ATAATCATCATCTACAAAAATATATCTTTCAAGCGAGCCGTTACTGAACGATTTCCAGTG
AAATTATTACATTATTCAGAAGTTGAGTCTAAACAATTTTAGGACTCATTTTCTAAACTC
CAAGAATGGAGATTATAGTCATTCTACTTAACGGGTCTATGATAAGAAGGTAGCAAATAA
ATAAATATTCAGTTTTGGAAGATTGGTTAGTCAATTAAAAATCAAAGTTTTTTTTGTATT
TCGTTTTAAATGCAATTTATTTATTTATTTAATTTTTTTT
>cap3_Contig743
ATTCAACTGTACCCAGCCATTGGTGAACCCTTACCTCGAAATCTATTGTGCTGTATCCCT
CGCACGCTTCTTCGCTTTCATCGGACCCGTCACAACAGTTCTTATCCAGATCACAGATGG
AATCTAGCGAAATGCATTGTTTCGAGATGCTACACGTGAATTTCGTGTGTTTGTCGCATG
ACGTCGAAGGTGGTTCTGAGCAATGGAATTTCCAATCGTCGATCGAAACGTCCGTGTGTG
TGTTCCAGTAGTGATCCACTTCAAAGATGATATTGAAGTCACGTGGGCAGTGCGGGAGGG
AAGCCGTTCCTTCCCTCCATTTAATCCCAGTCGTGTTGGAGTCAACCCAAACCTTCGAAT
CACTCACATTGCCTTGTTTGTCACGTGATCTGTAAATAACACTGAGAATGGCGTCGTTTT
TATCAGCAACCTCATCGTGATACATGTTGTACCAGAAGGAGAGGTTACAGTGGTACGCGC
CATGATGGAACAGCGGGCTGAGGAAGTAGGCCTTCGGGAAGTTGCTTCGGACACGGTGCT
GAGCGTCCACGTACATGTAATGGCCTAGTATAGTTTTCTTCGTGTGATCGTAGTGGGGAC
CTGTTTGTTATCAGGGCCAACCCTGGTGTATCTCCACATGAGGTGACTCTCTTCCGGGTT
CTCATTCTGCCACCCGCACGTCGCTCTCCTCGAATCACATGA
>cap3_Contig744
GGCTTTGGGCGCTGATAAAGTGTTTGGTGCGTTAGTTGGTCTAGTTGGAGTAGTTTTAGG
TTGATTCGATTTAGGTCCACTAGGTTGATTTGATTTAGGTCCAGTGGGTTGATTTGATTT
ACACCCAGTGGGTTGATTTGCTTTTTGTGCTATCGATTGGTTTGTTTTAGGTTCAATTTG
TTGATTAGAATTAGGTCCATTGAAATTAGGAAGTGATATTTTAGGTTTATTAGATCTAGG
TTGATTAGATTTACTTTTATCACTTTTACCACCCCCTATAGGGACAGAAGACGGGGTGTT
CGCTGGATGATCGATAATCTTGATTTCTTCTTCCTCCCTTTCGACTGCTTTCTTCTTCAG
AGCATTGGTAATATCAAGTATACTTCGTTTCGATGGTTTGCTCAACTTGTCTGGAGATTC
GGGTCGTTCTTCTCTATCATCTTTTGACATAGGGACTGGGACATCAGAACCATCAACATC
AGTAATGGATGAAGTTACTGTGCCGTTGGTAACTTCAACTTCCTCGTCGTC
>cap3_Contig745
GTGACTGATTATTTGGATCCAATCCCAACAATGCCAGAAGATGATTACCTACAGCCTGTT
GATGATTCGTCCATGCCAAGACCAAAGTTGGTTCAGGATGAGCATGATTATGATATTGCA
TTACTACCGATGTCATCAAATGGTGCTTGCAAAGCTGTCCATTCTGAAGATGCAGATGAA
TATGTCGACCCTACTAACACCAGTGAAGAGGATTATCTTACAGCTGTTTGAAATCATTTT
TTTTTTAATTTCTCTTTAATTTGTGTAAAACTAGTTTTAATTTTTTTTACTAATTTTTGT
TTATTGTGTCTATTCGTAAATATCTTTCTAAAATATTTATTTGTGG
>cap3_Contig746
TTTGGTTTTACAGAAGAATGTTTCAATGCGAAATACATTTATTTGGTATGATTGATCTTC
ATGTTCATCATTCCCTCCTGTTGGAGCATCATCTTCCATCTGCCGAACGTCTGTACTTTT
CCTACAAACATTGGCCAGATGTCCTATTTTGCCACACTTTTTGCATTTTGCAGATGTTGC
GGCACACTTACTACGATGGAGCCAAAGATTTGATTTCCACAGCTGTAGCAGTTGATGATT
CTCTTCTCCTCGGATTGTTGAGTCCTCTTGCCTTTTTTTAGGGCTTGATAAGAGTATTCC
CCATCTTGTTAACTGCAAGATCACCGCTAATCTCAG
>cap3_Contig747
CTTGATACACAAAGAAATTAGGAGCCTCGTTTTCATGGCGCACGTCACCCCCTAAACCAA
CAAGAGGCTGACCATGACCACGTTGACTCGATTGGTATTTGAGTTGGCTGAGAACAGCTT
CTTTCGGATTGTAAATGTCCTGTTCATATGACGTCATATAAGTTTGGATTTTGACGTCAC
CTTGTGTTTTCTTGAAGCGTATTTTGAACTCACCCAGGGTCGGGTTGCGTCCATGAAGTT
CCTTTAGTTTACCATCACTTGCGATGCGTGTTATTTTTCCAGAACCTTCGTTGGCGAATG
TAAACATTAAGGAGACAGCTTGGTGAGAATCCTTGCGAAACCTGGCTTCTCCTTTGACGC
GAGCAGTCCAATCTCCACCATGATCACCAGTGACACGTTTCAAGAACTGTGTGGTGAGAA
TGAAATCTTCATCGACGATCTCTTGTGTACCAAACATCTTCCCGTCGTGTTGTAGCCAGC
CGTACTTGGGGGAGGTTGTCGCTCTGCTCACACGAATACCTAACTTTGATCTGTCCATCT
TCAGGATATTGTGACAAACCAAAGCATTCCAAAGAGCAGTGATTCTGG
>cap3_Contig748
ATTGTTTCAAACCATACAATAATCAATTCAATTTCCATACTAATTCACCCTTCAAATCAG
ATTTTTCGACTACAAATCGTTTTGGTTGCTTGATGTAAATTTCATGGTCTATTTCTACAT
TCAAGTAACTGTTTTGACATCTATTTGATGAATTGTTAAATTGAAACTGAGCAGCTGGTG
CGAAAGTTTCAGAATAGCTTCCTGAGTGTATCCCTTTGCAACATATTGAGCCTTGTAAAT
AATACCTTCACCACTCAAACCACACTTCCATGCAAACACCCATCTACCACCAACTAAAGT
GTTACCATGGGGTAACTTTATTTCATCAAAAGTATTCTTCTTCTTTAATGAATTCATCTC
TTCATTCATTGCTTCTTTCCATAAATCAGATTCAGGACTCCTCACAGTTTCTTCATACAT
CTTTGGTACATGAACACTCTCAGCTCTGTAACAGTAATTTATGACATAGACTATCATTTA
CAACATATTCATTCAAATGATCAGGTTATCTTCT
>cap3_Contig749
CCGAGTTCTTCGTTCATTTTAATTTCGTCGGCAATCTCTTGCTCTTGTTCTCGCAATTCG
CTAATCTTTTCACGCATACTGCCGACAAGTTTCGCCTTTTCATTATCAAGATCTCCAGGT
CTCGGGCTGTGCATACTGTCTCGCCGACTGTTCTCCCCACTACTCAACAACGACGGCGAT
TGTGTCAACGACCTGTCGTAACTTTTACCCAACAACTGATAACCGGCGCTCTTCGCTTCC
TCGTGGCGCTCCGGTGTCGACATCAATCGCGAGTCGCCTTCAAGCGCTGCAACGTCTTCA
TCGAGCGTTTCCCGCGATCCGTTCAAATCTTTATAATCAGACGAATAATTCGACATTGGA
CTCGCCCGTTGACTTTCGGAAAGAACGACGATGCCAGAATCAATGGTATTCGTCGAATCG
GTACTGACACAACTGCCATGCCGACTATTAGCGAGAGAAGAATCTTTCTTACGACGATTT
ATGGTCGTTTACGTTGCGACTTTCTTTCTCGTTACTGTCTTCGCCTTGATAGTCGTACGT
CAAGATATCGTTATCATATTGTTTATAAGAGAGGTCGGAATAATCTTGTAAGCTGTCGGT
ACTTATGTTGCTGAGTCCTTTCTCGTGAGTAAATCTGGGCTGACTCATCACAGGC
>cap3_Contig750
GAAATGGCGAAATGGTGAACAGAGAAGATCTGATGTCAGAAGGTTGGTTGAAAACGATGA
AGAATCCCAGTAATGCCGTAGATTCGAAAGAGATGCTTAAAGTGAACACGCTCTTTCTCT
TCTTTCCTGGAAATCCTATACGTATTGTGATGCATAAGATTGTCTCTTCGAAGTACTTCG
ACAACATCATCTTGTCGTTCATTCTCATAAGTAGTGCATTCCTTGCGTTAGAAGATCCAA
CAGATAAACAAGCGAAAATCAACACCGTACTGAGGGGTTTCGACTTCTTCTTCACATCAA
TATTCGCTATGGAAGTCCTAGTAAAGATCATCAATTATGGCGTCATCTTACATAAAGGAT
CGTACTTTCGAGATGGTTGGAATTTCATTGATGCTCTTGTTGTCTGTTGTGCTATCGCCT
CTCTCGTATTAGACTCCAATGATTCTGGTTCTAAAGTTTC
>cap3_Contig751
CGGACTCGAGCACTTAATAAGATTCTGCTTCAAATAAACTATCAATGAAGTCAAAAATAC
GTTGGCATGAATTTTCGATACAAATTCAAACGAATAACTTCTCTCAGTTAAAATATTCAC
TAATAATAAAATTTACATATATACAACTGTTTGCACTTCGATACAATATCTACGGTTTGT
CATTATTCTCTCGTGATGTTATGCTCATTCAAGCTTTTGGTTTATTAACGCATGCTTTAC
TTTGAACATTTTTCACGAAGTCAGCATTCAGTAGATCTTTGAAAGATGTTGCACTAAGCA
TGTTATCCTTTCCTCCAGCTATCTTCTCTAACTCAGCAGGATTAACACCAGCTCCCATAC
CGACTACAATGAGGTTAATTCCAGCATTTCTCAATTCAGCAGCTATTGCTGCTGGGTCTT
CGGCATCGTTTGTCGCTGTTTGAGATCCATCAGTTAACAATATAAGTATTTTAGAAGCCC
TGCTCTAGCTCCATTAGCTTCGA
>cap3_Contig752
CTACAAGTTCTCCTGTTTCATCAAAGACCTGCTTGCAGTTCATTGTCTCCACCAGCCACT
CCACATCCTGCTGGCCGAAAAAAATACCGCGCAATGCGGATTGCGAGAAGAACGCGTACC
GCGACGCGTATTACTACGACCGTTCGAACCGTATCTTGTATTTGCGTCGCGCGCAACTCG
AGAACGTCGGCGTGTTCAACCTCGTGCTTGTCCACACGCTGTCGCATATACACGTCGGCG
ACATGACGGACGACGCCGATCCGACGTTTGTGAAGGAGTTCTACAAGTCGTTGAGCGTCG
TGTGTTCTGATCTCTTCTTGTCGCGTTACAAACGCGCCAACGCGCTCAATGAAGCCGTGC
TGATGACGGCACAAGAGGAGGGTGAAGGTGGTGCGTCTCTCGAAGAGGTCGGCAAGAAAG
TGTTCGAGAACATCTTCGACGACGCGCACGACGAGATCGATCGAAACAACGTCGTCAACG
ATCTGCTCGACACGAAACTTTTGCGCAACAAACGGTTCGAGAGCGACGACTTCAATCGCG
AGTTCATGTTCCAGCGATTGAGAAGGTACACAGACTTTATCGTGGGCAGCAAGCTGAAGA
CCTTCCTGGGGGATGTAGAAGACAAGCTCAGTGGGGTTAAGAAACAAGGCTCGCATATCG
AAGTTGAGAAGAGGCTCAAAGAACTGCAAGTACCGGTGAACGACTCCCGTCCTGTCACGC
AGTATGTACCTCATCGAAACCGCGACACGATGCTCGAAGTCGCGCGTCAAAACAGTCGCA
ACGTCGCCTTGTCT
>cap3_Contig753
TAGAAATATTATGTTTAGAATACTGGAAATAATGCTTGGTAACGAGAAATTCACAAATCT
[truncated: 14,251,907 more chars]
